# Supplementary material for: A Comparative Multi-System Approach to Characterizing Bioactivity of Commonly Occurring Chemicals
Source: MDPI journal article supplement (doi:10.3390/ijerph19073829), 2022-03-23
Supplement: s1 [file s1]

**Supplementary Material: A comparative multi-system approach to  
characterizing bioactivity of commonly occurring chemicals**

Brianna N. Rivera, Lindsay B. Wilson, Doo Nam Kim, Paritosh Pande, Kim A. Anderson, Susan  
C. Tilton, Robyn L. Tanguay



## Contents:

### Figures

- S1: Correlation matrix investigating co-occurrence of real-world chemical concentrations
- S2: Concentration response curves for cell viability in NHBE
- S3: Concentration response curves for cytotoxicity in NHBE
- S4: Concentration response bar plots of bioactive chemicals for cell viability in NHBE
- S5: Concentration response bar plots NHBE Equi-Mix and components in NHBE
- S6: Concentration response bar plots of bioactive chemicals for cytotoxicity in NHBE
- S7: Concentration response curves for Any Effect in zebrafish
- S8: Concentration response bar plots for each morphological endpoint in zebrafish
- S9: Zebrafish embryonic photomotor response movement versus time plots
- S10: Zebrafish larval photomotor response movement versus time plots

### Tables

- S1: Description of morphological endpoints screened in zebrafish
- S2: Percent incidence of each morphological endpoint in zebrafish
- S3: Percent cell viability and cytotoxicity in NHBE
- S4: Lowest effect levels for each chemical across NHBE and zebrafish screening
- S5: Exposure concentrations of BMC mix components in each model system
- S6: Summarized zebrafish embryonic photomotor response movement data
- S7: Summarized zebrafish larval photomotor response movement data



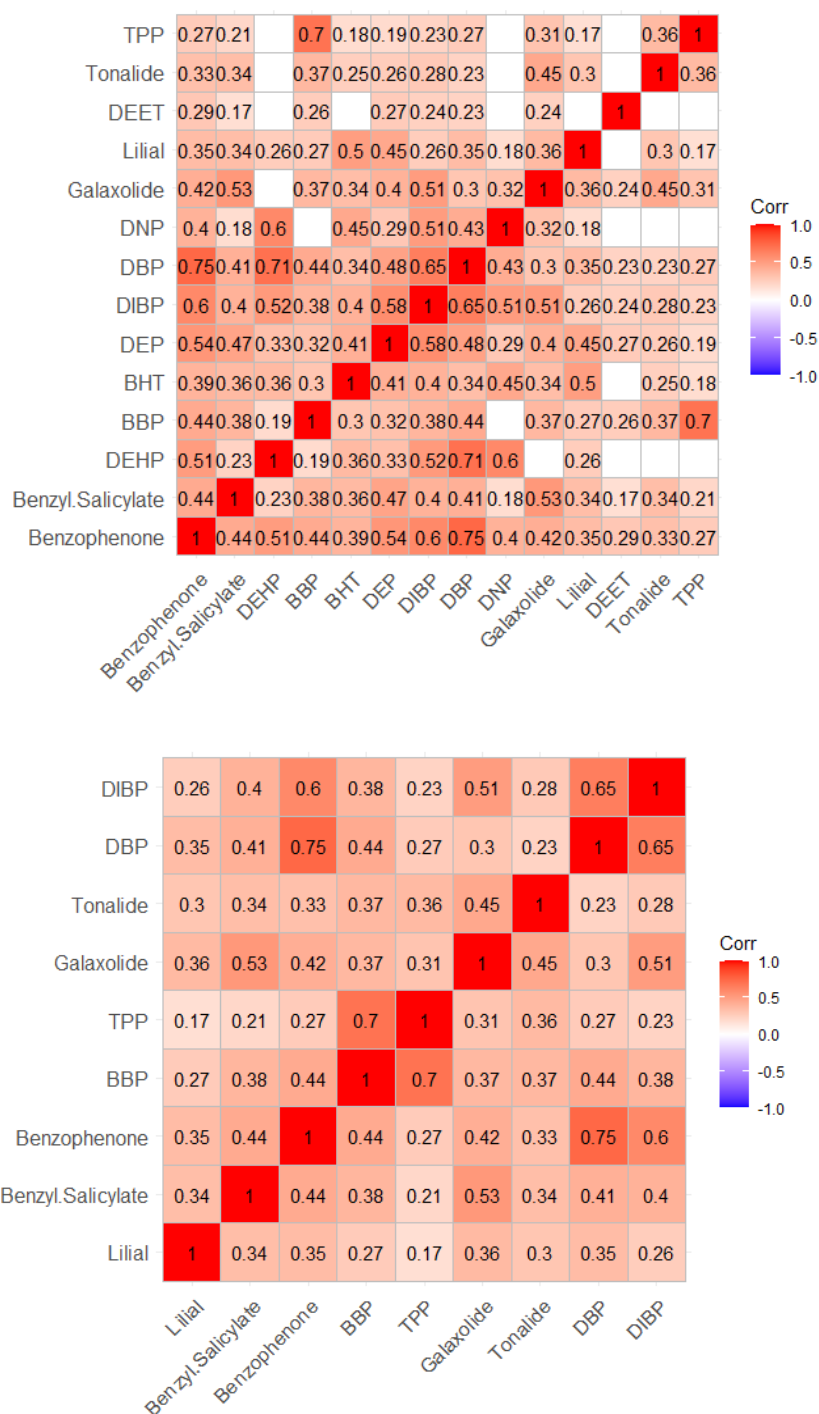

**Figure S1.**

Correlation matrix investigating co-occurrence of real-world chemical concentrations for A.) all G14 chemicals B.) all bioactive chemicals in zebrafish, using exposure data from Dixon et al 2019, labeled with correlation coefficients. Only chemicals with significant correlations ( $p < 0.01$ ) are shown.



AHTN best fit model (gamma)

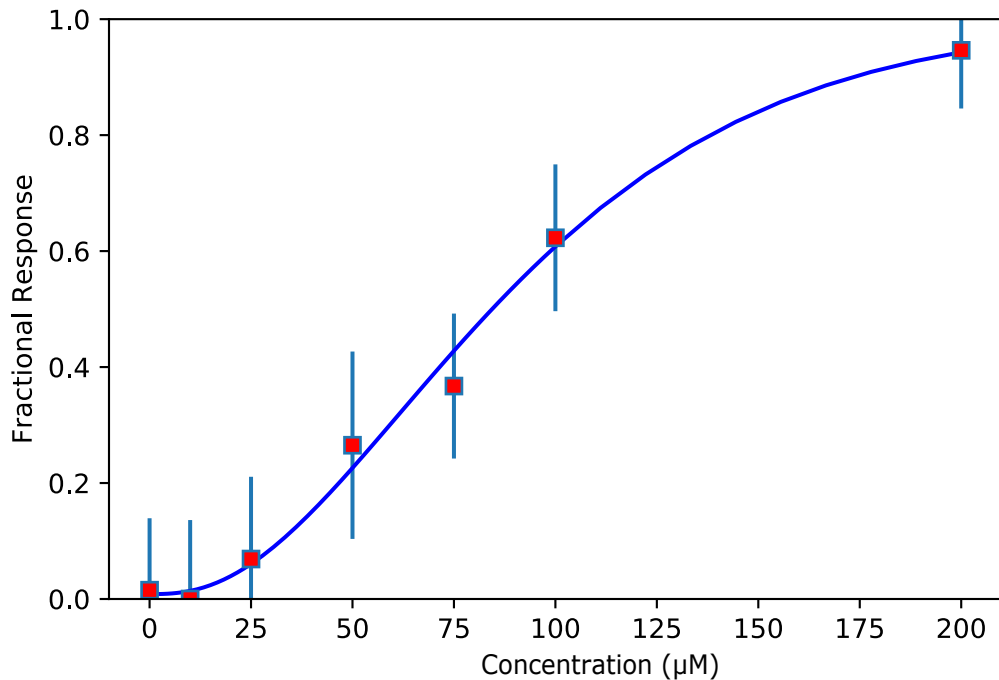



BHT best fit model (logistic)

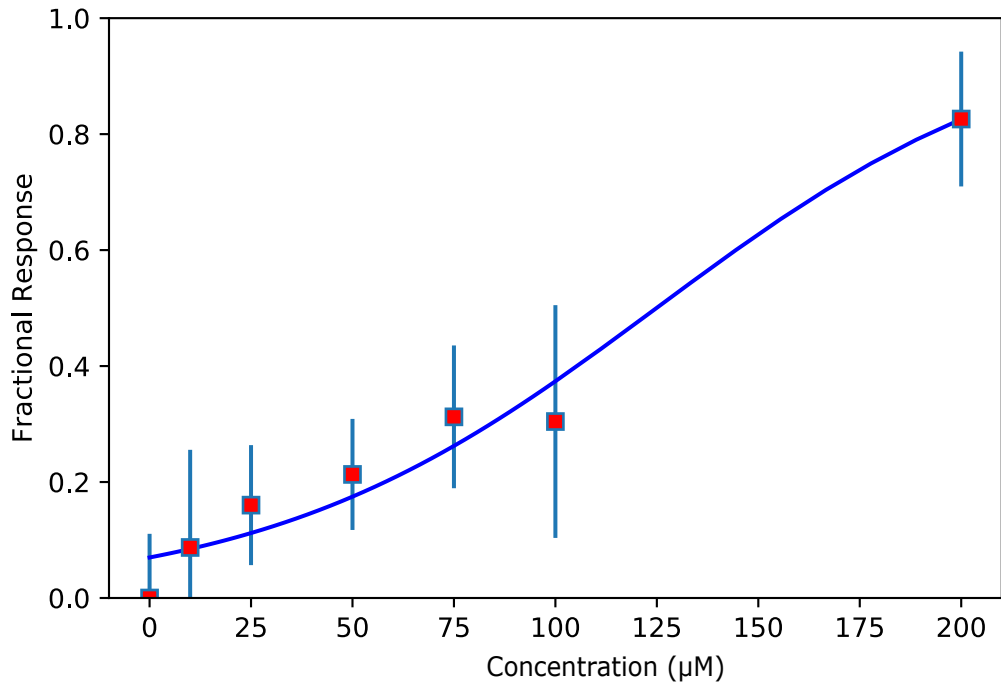



HHCB best fit model (gamma)

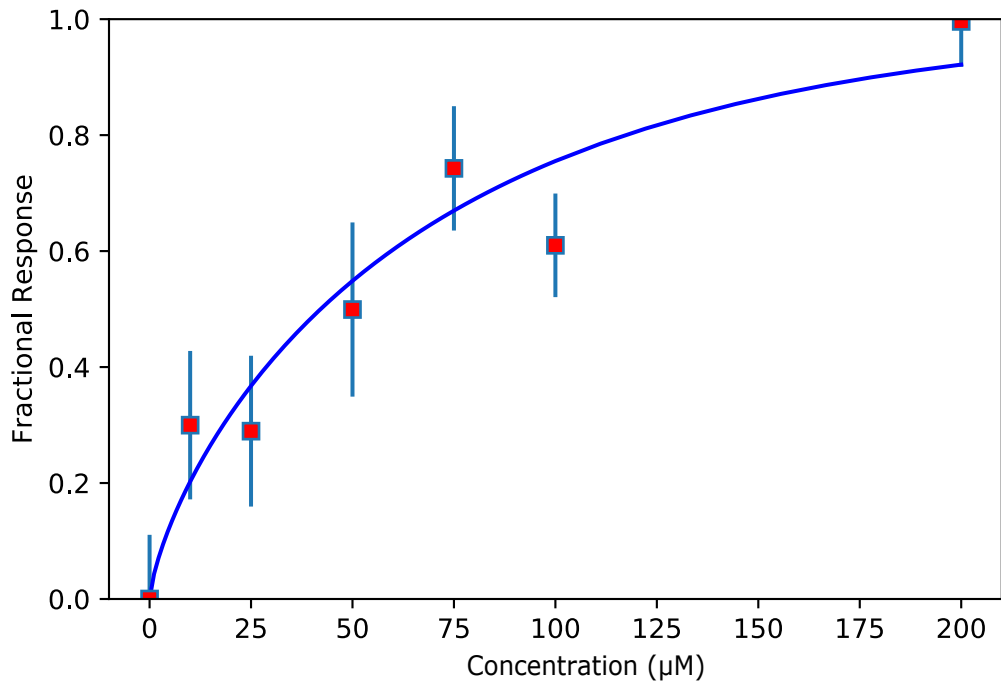



NHBE Equi-Mix best fit model (weibull)

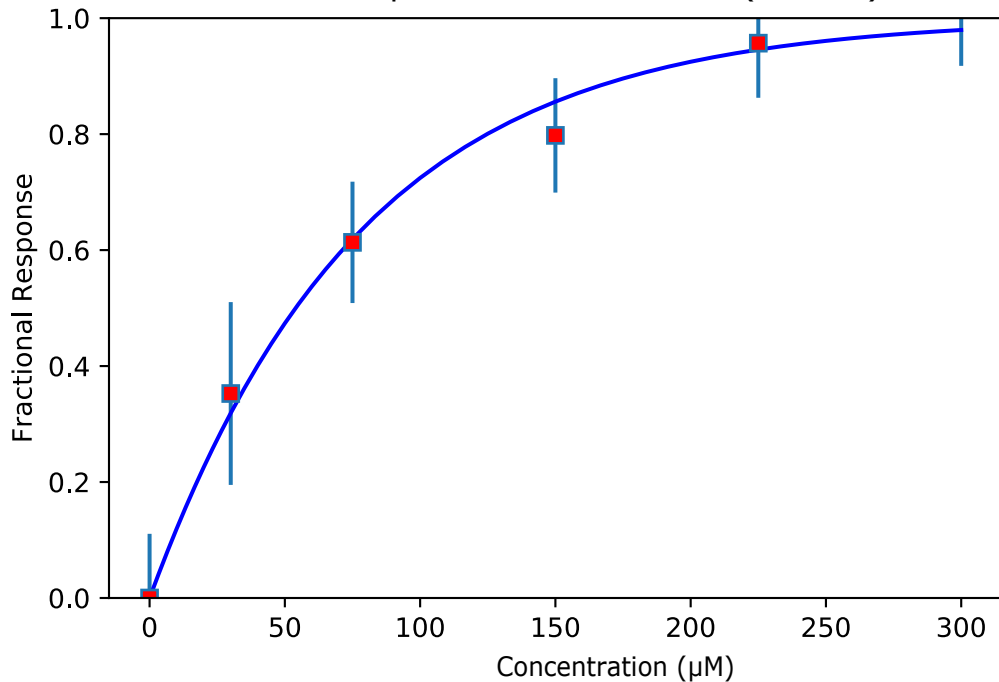



NHBE BMC Mix best fit model (log logistic)

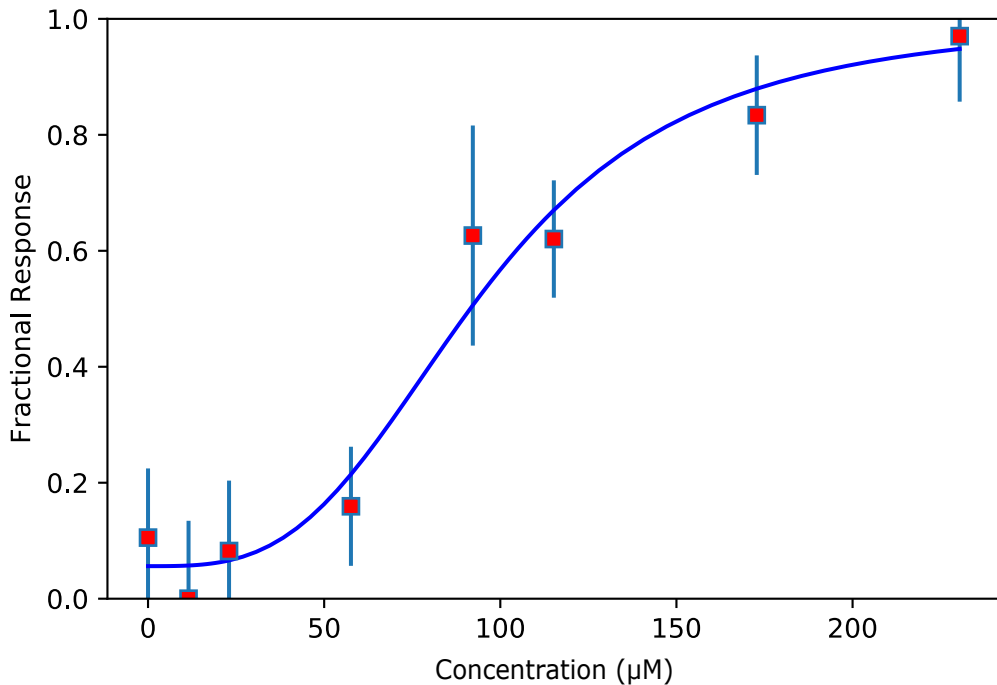



G14 Mix best fit model (log logistic)

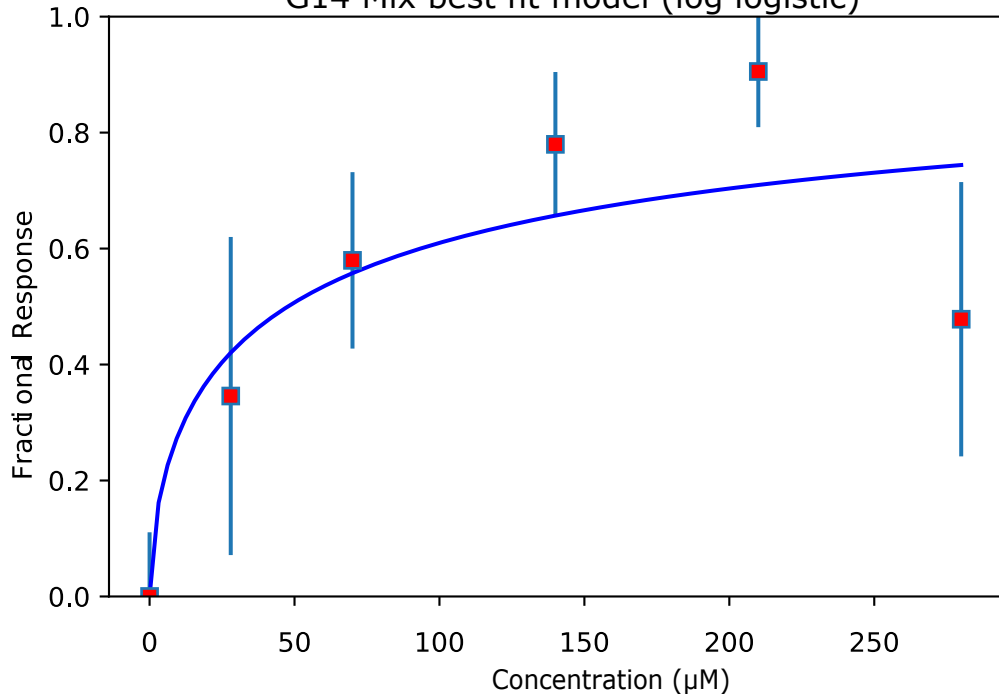

**Figure S2:** Concentration-response curves for each active chemical and mixture for cell viability in NHBE.



AHTN best fit model (logistic)

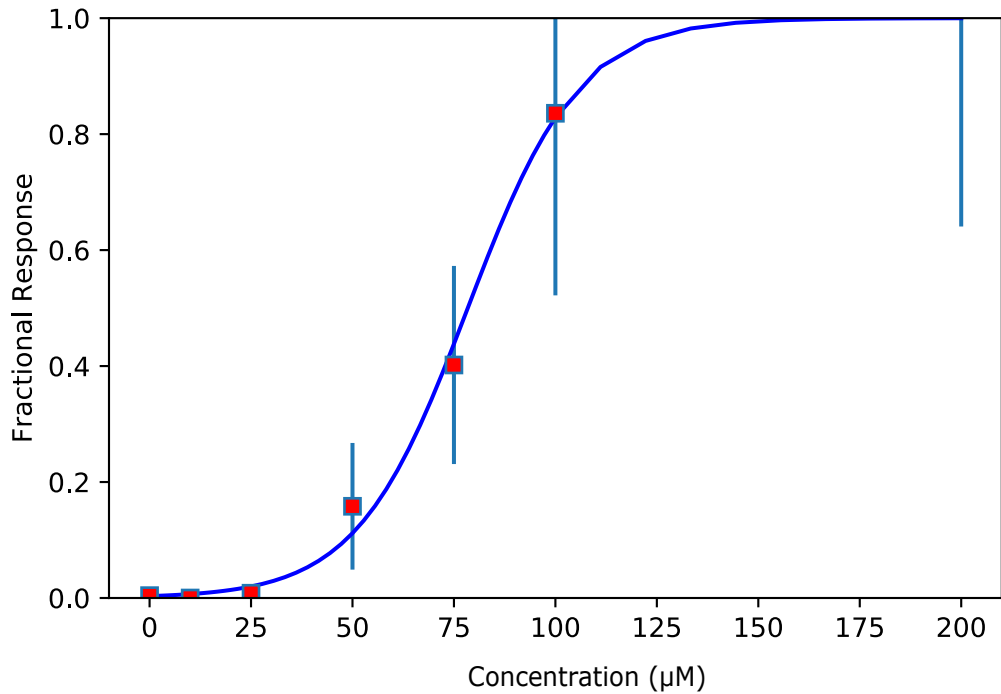



BHT best fit model (log logistic)

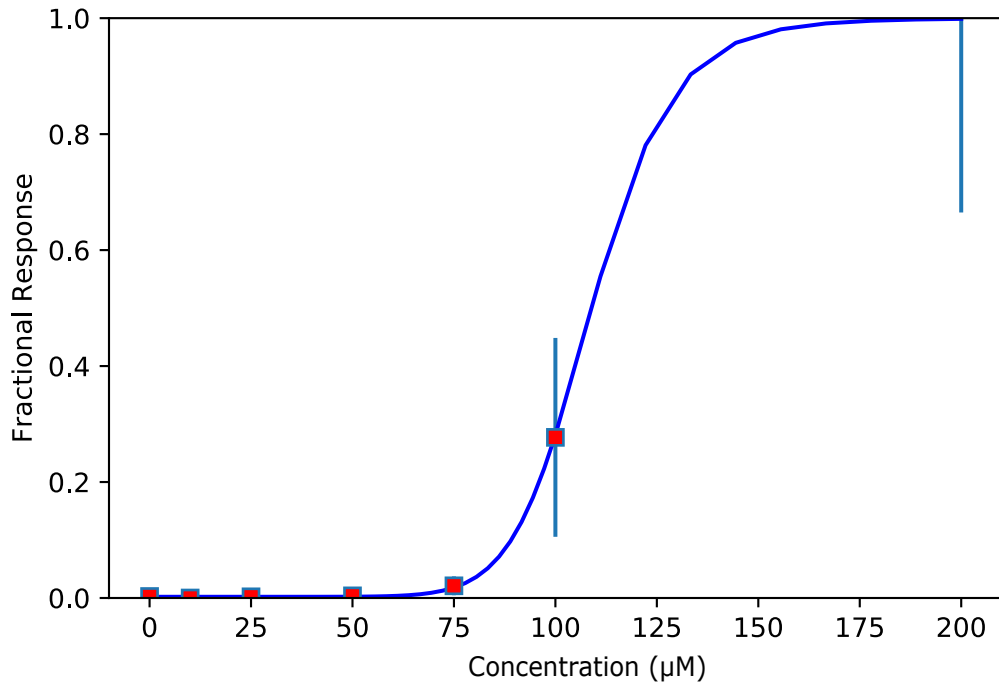



HHCB best fit model (logistic)

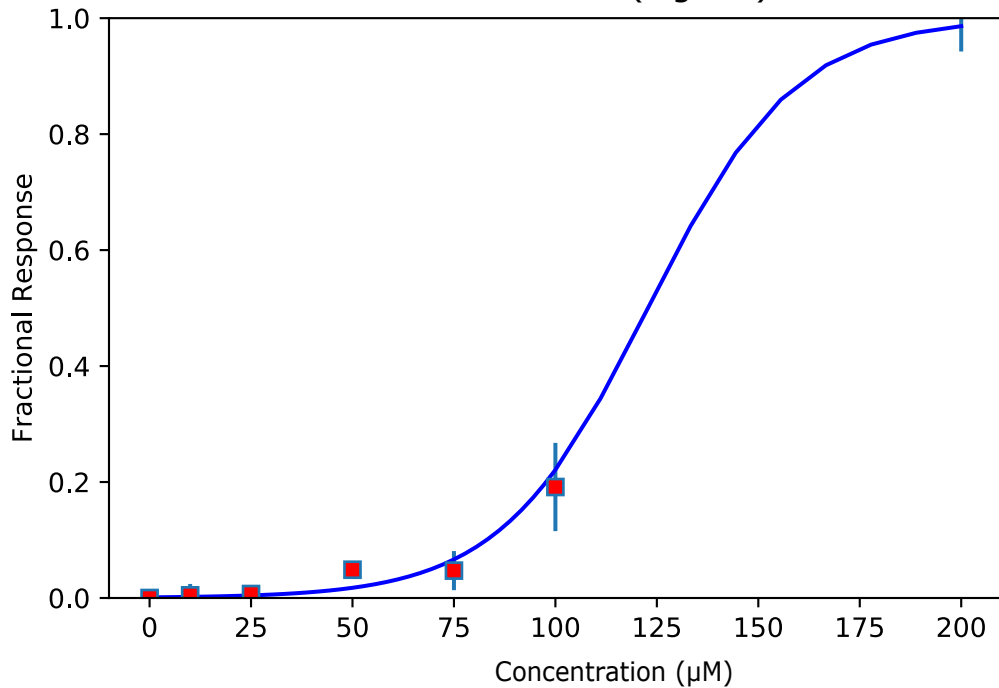



### NHBE Equi-Mix best fit model (log logistic)

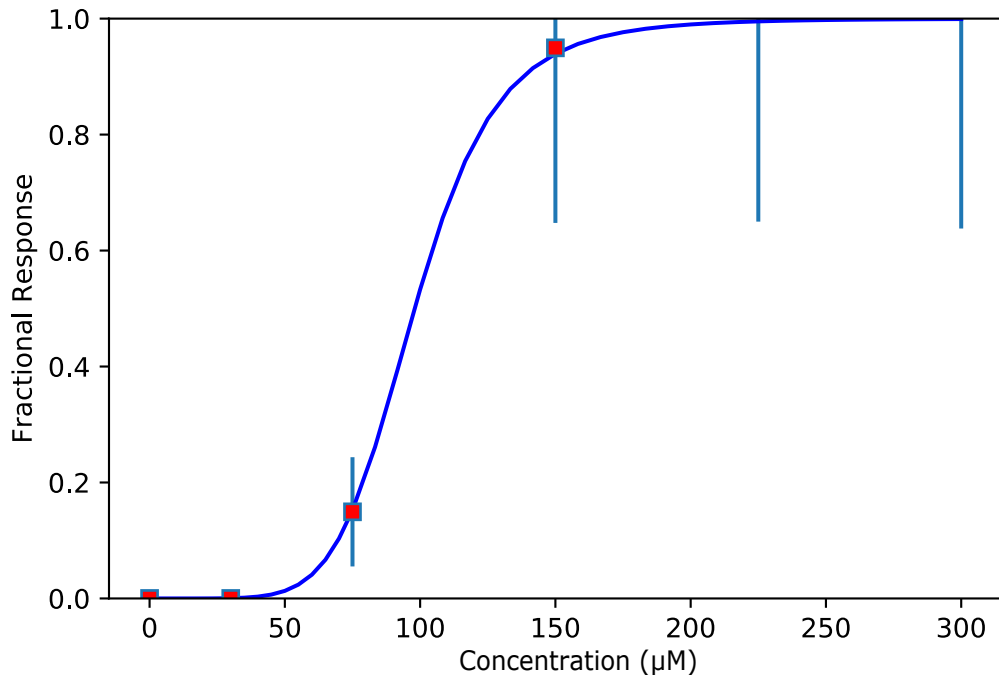

**Figure S3:** Concentration-response curves for each active chemical and mixture for cytotoxicity in NHBE.



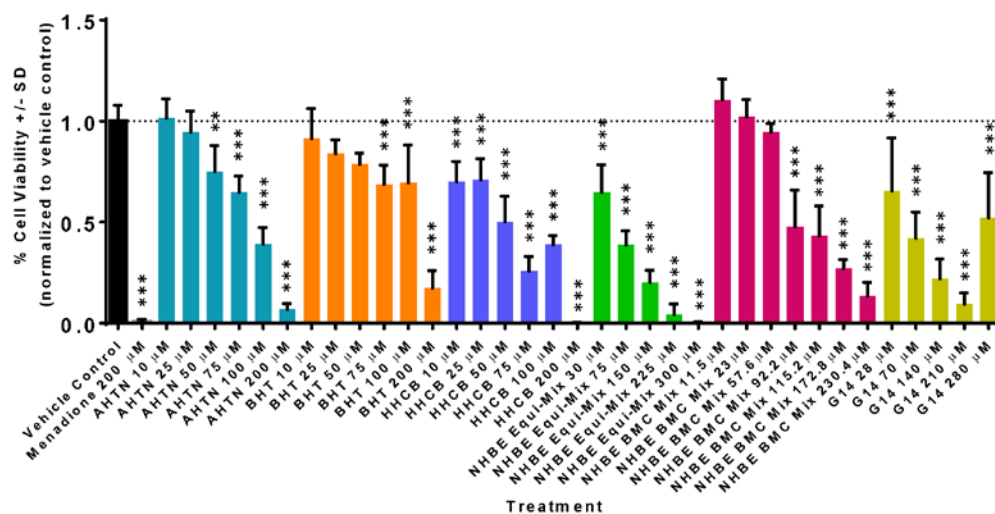

**Figure S4.**

Concentration response bar plots for cell viability in NHBE. Significantly different responses from control were analyzed using one-way ANOVA with Dunnett's multiple comparison correction. \*  $p < 0.05$ ; \*\*  $p < 0.001$ ; \*\*\*  $p < 0.0001$

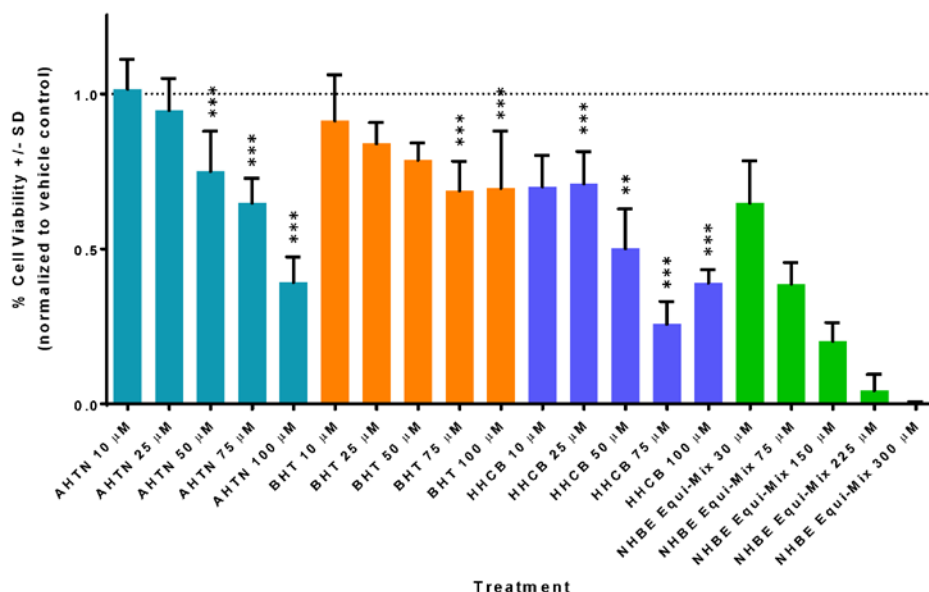

**Figure S5.**

Pair-wise comparison between NHBE Equi-Mix and individual components for cell viability. Significantly different responses from control were analyzed using Tukey's honest significant difference test. Chemicals significant different from control (Figure S4) were compared to their respective concentration in NHBE Equi-Mix. \*  $p < 0.05$ ; \*\*  $p < 0.001$ ; \*\*\*  $p < 0.0001$



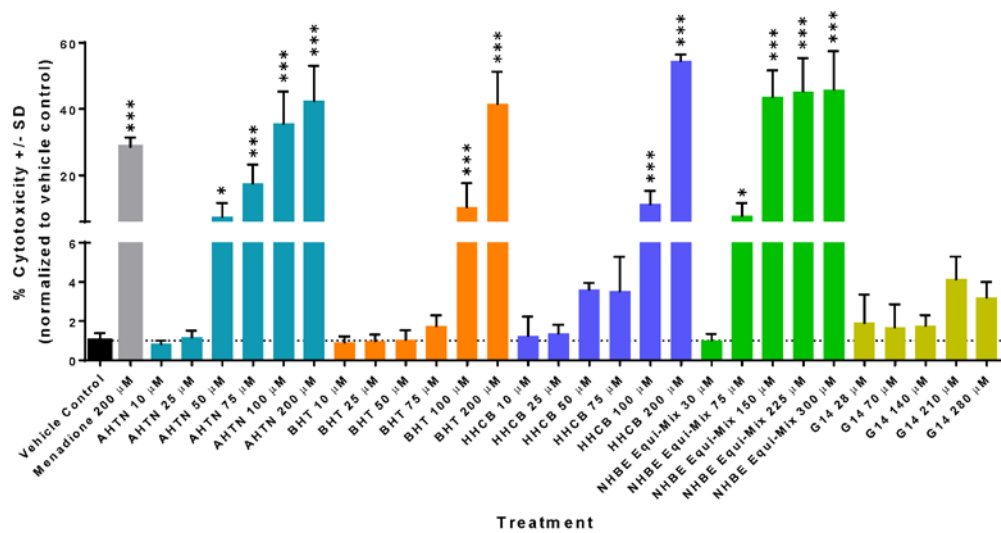

**Figure S6.**

Concentration response bar plots for cytotoxicity in NHBE. Significantly different responses from control were analyzed using one-way ANOVA with Dunnett's multiple comparison correction. \*  $p < 0.05$ ; \*\*  $p < 0.001$ ; \*\*\*  $p < 0.0001$



**Table S1.** Description of each morphological endpoint screened in zebrafish

| Endpoint ID | Endpoints in phenotype atlas              | Description                                                                      |
|-------------|-------------------------------------------|----------------------------------------------------------------------------------|
| MO24        | ---                                       | Mortality at 24 hpf                                                              |
| DP24        | ---                                       | Delayed developmental progression at 24 hpf                                      |
| SM24        | ---                                       | Spontaneous movement at 24 hpf                                                   |
| MORT        | ---                                       | Mortality at 120 hpf                                                             |
| CRAN        | eyes, jaw, snout                          | Malformed or missing eye, jaw, and/or snout at 120 hpf                           |
| AXIS        | axis                                      | Curved or bent axis at 120 hpf                                                   |
| EDEM        | pericardial edema, yolk sac edema         | Pericardial and/or yolk sac edema, heart and/or yolk sac malformation at 120 hpf |
| MUSC        | circulatory system, somites, swim bladder | Lack of circulation, malformed or missing somites and/or swim bladder at 120 hpf |
| LTRK        | trunk, caudal fin                         | Malformed lower trunk and/or caudal fin at 120 hpf                               |
| BRN_        | brain, otic vesicle, pectoral fins        | Malformed or necrotic brain, otic vesicle, or pectoral fin at 120 hpf            |
| SKIN        | pigment                                   | Abnormal pigmentation at 120 hpf                                                 |
| NC__        | notochord                                 | Malformed notochord at 120 hpf                                                   |
| TCHR        | ---                                       | Lack of response to touch at 120 hpf                                             |
| any.effect  | ---                                       | Incidence of any of the above morphological effects                              |



AHTN best fit model (logistic)

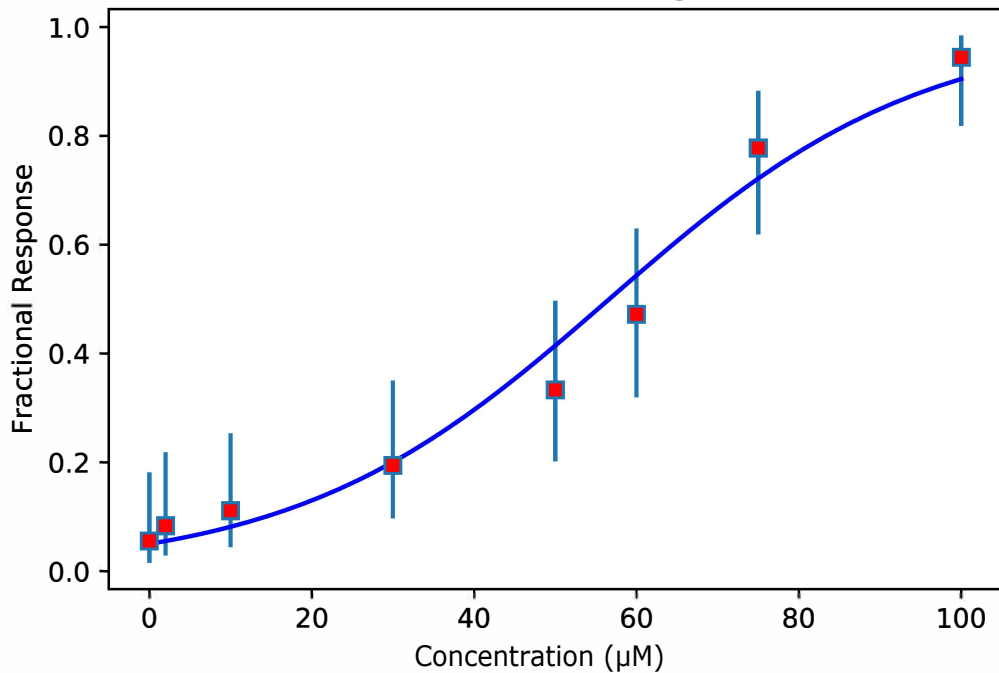



BBP best fit model (log\_logistic)

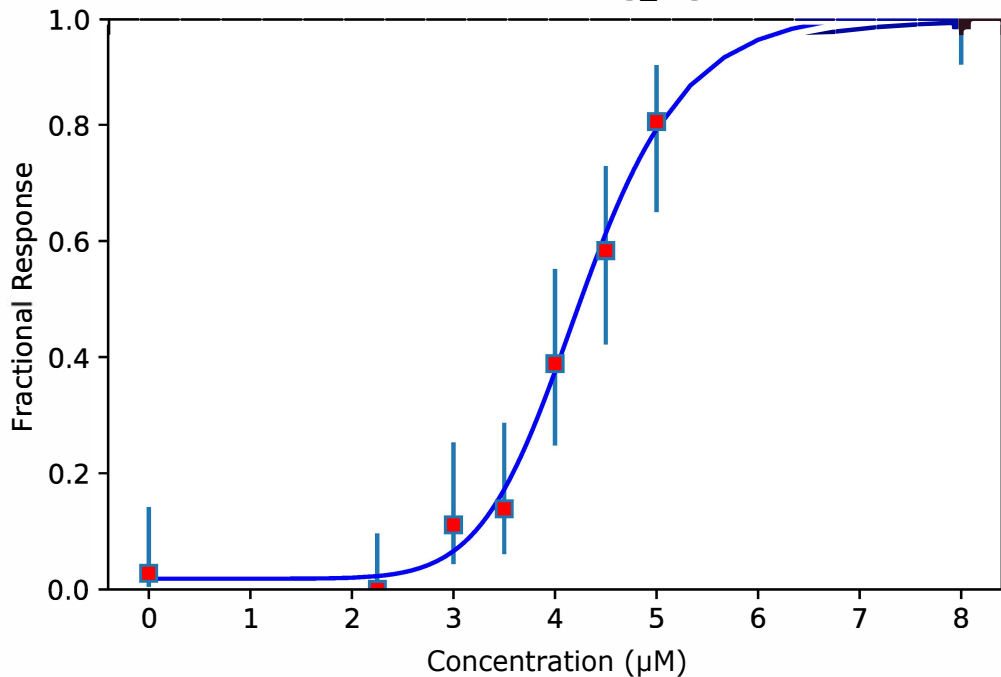



BP best fit model (log\_probit)

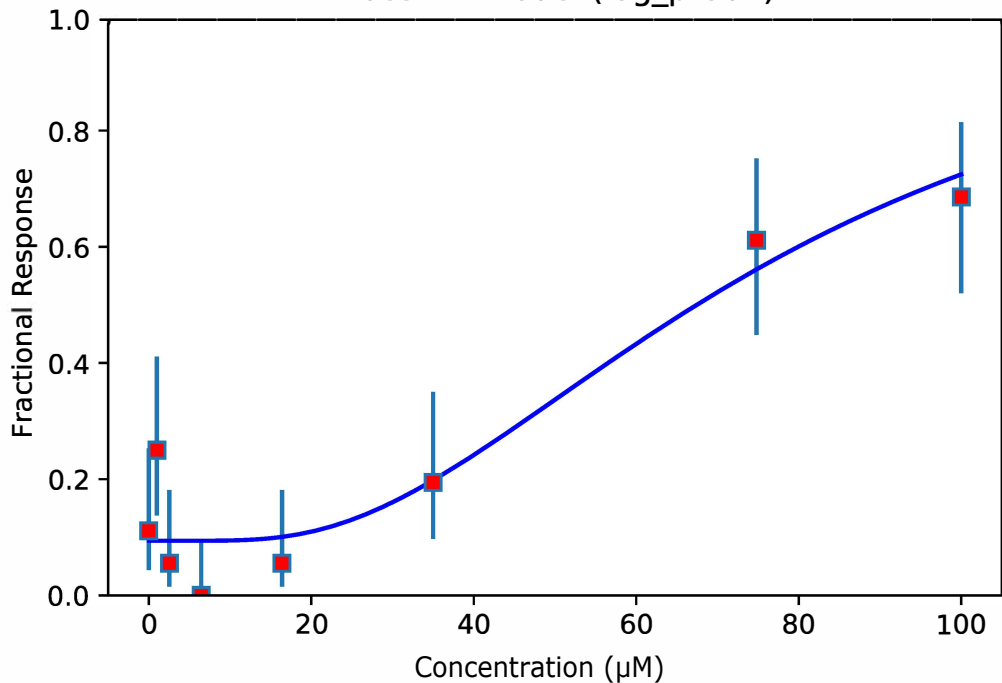



BS best fit model (log\_logistic)

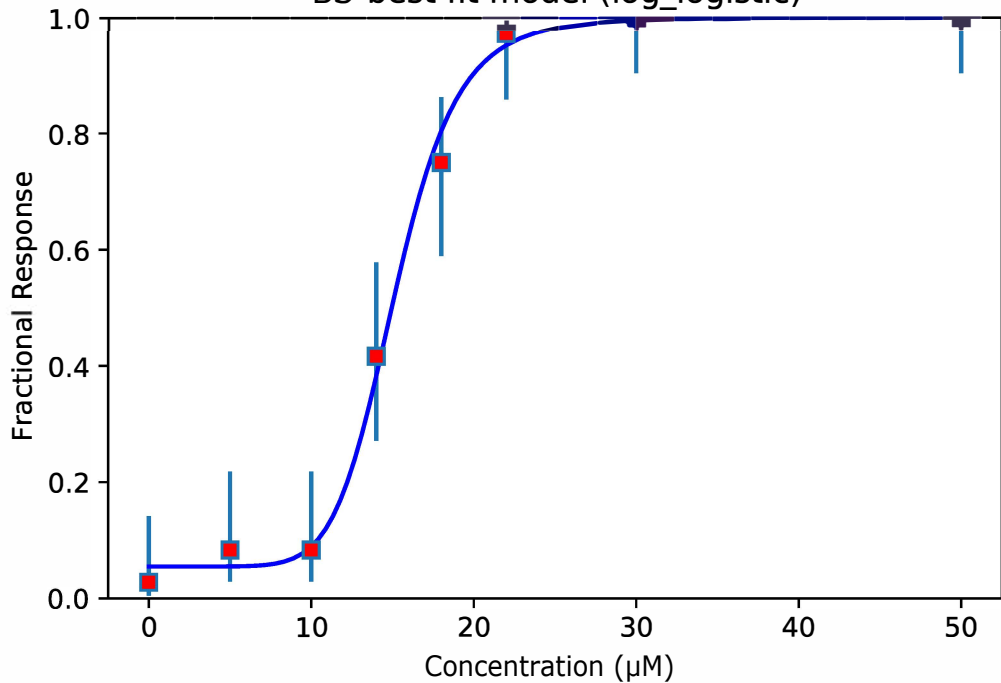



DBP best fit model (log\_logistic)

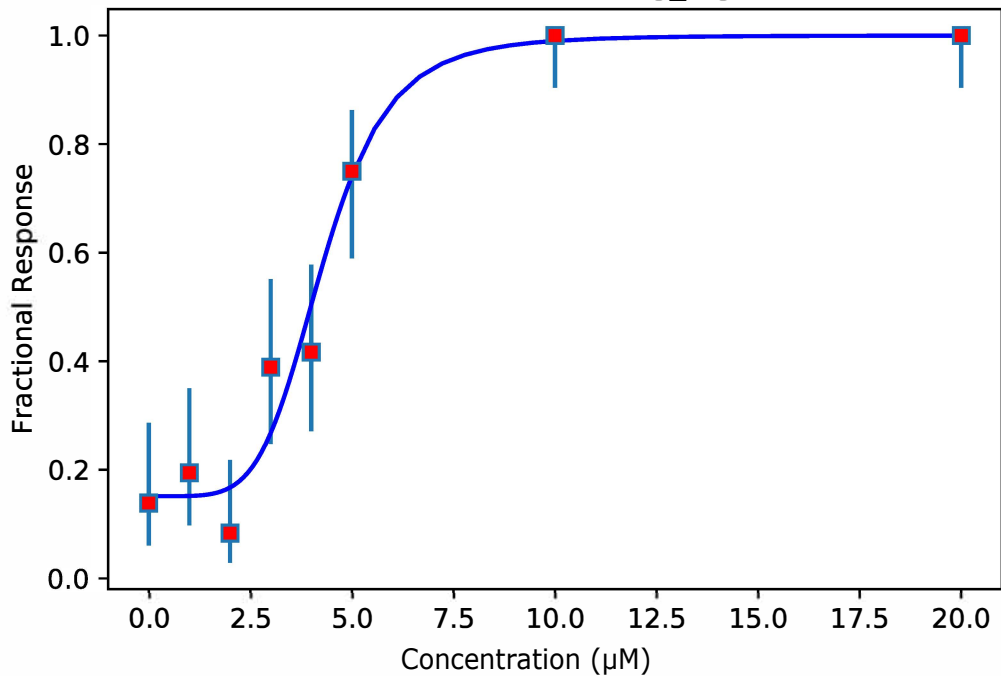



DIBP best fit model (logistic)

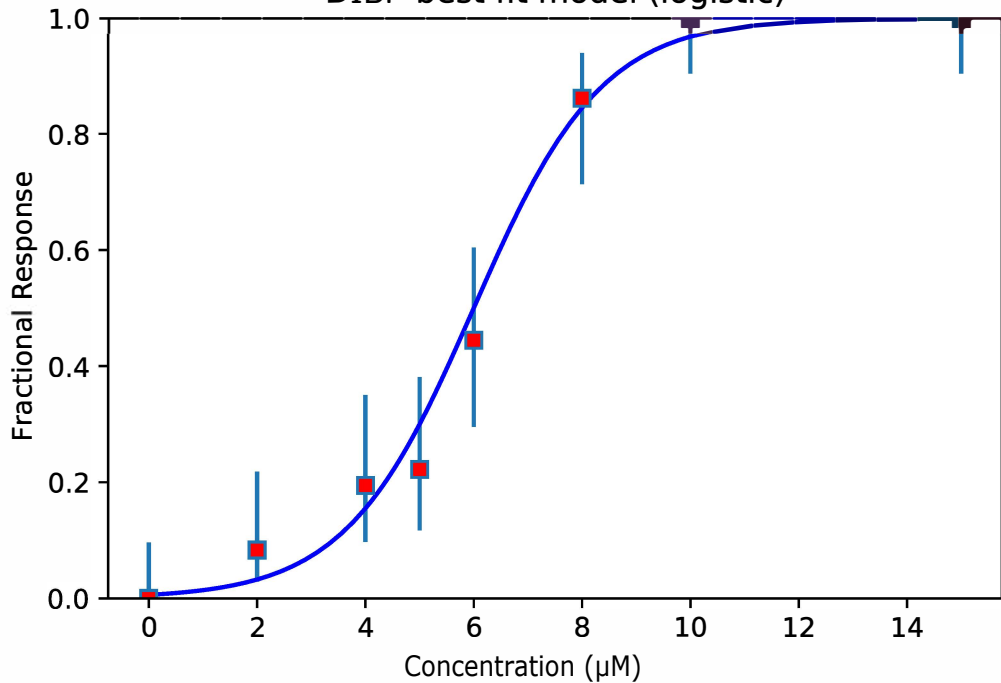



HHCB best fit model (log\_logistic)

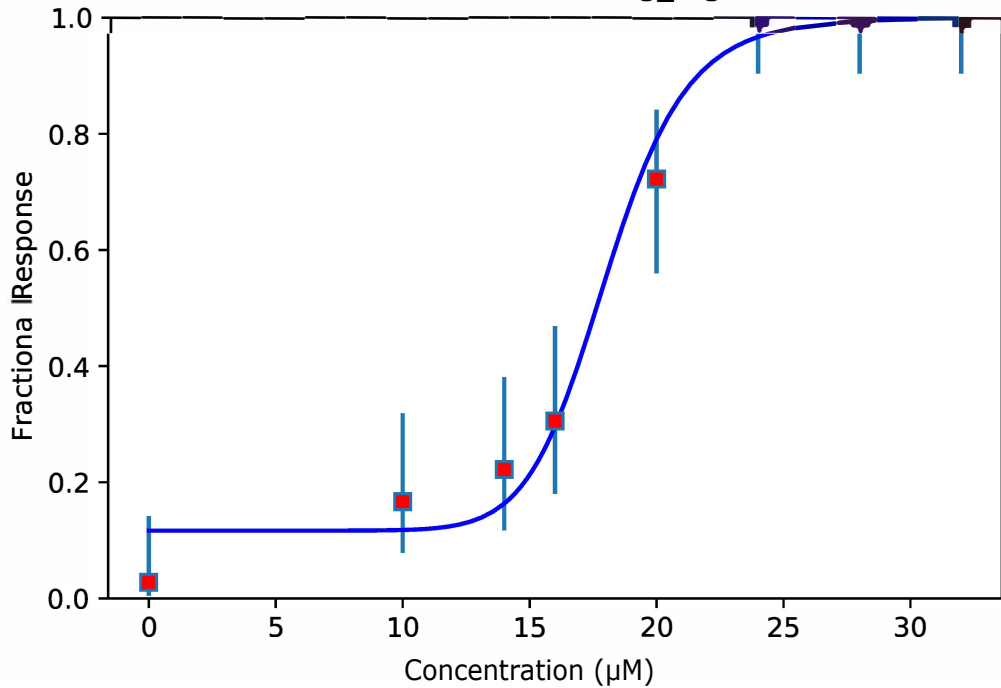



Lilial best fit model (log\_logistic)

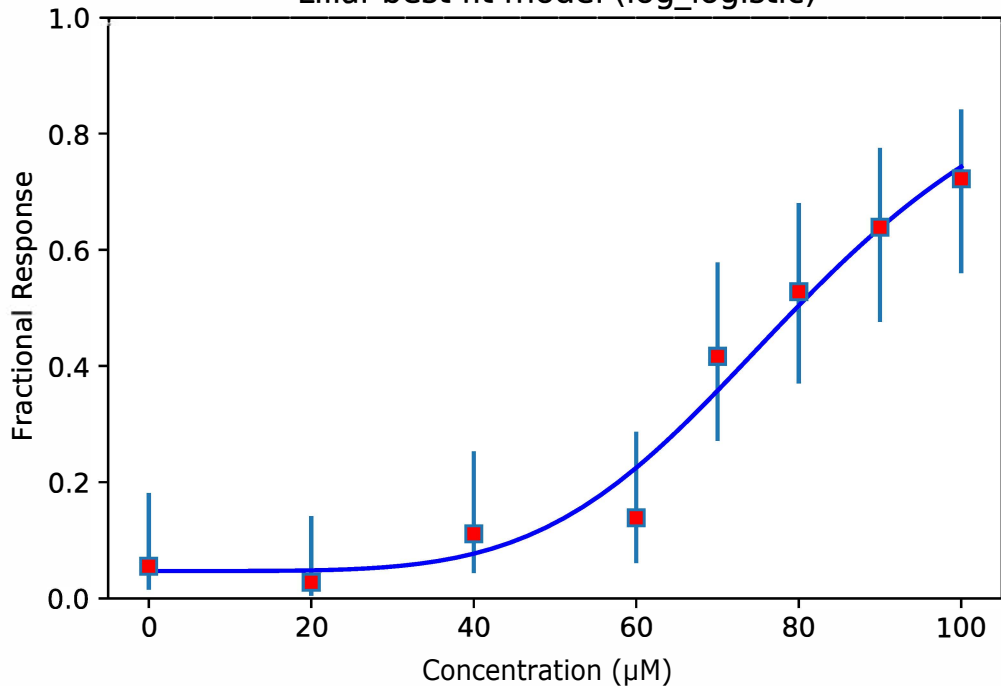



TPP best fit model (log\_probit)

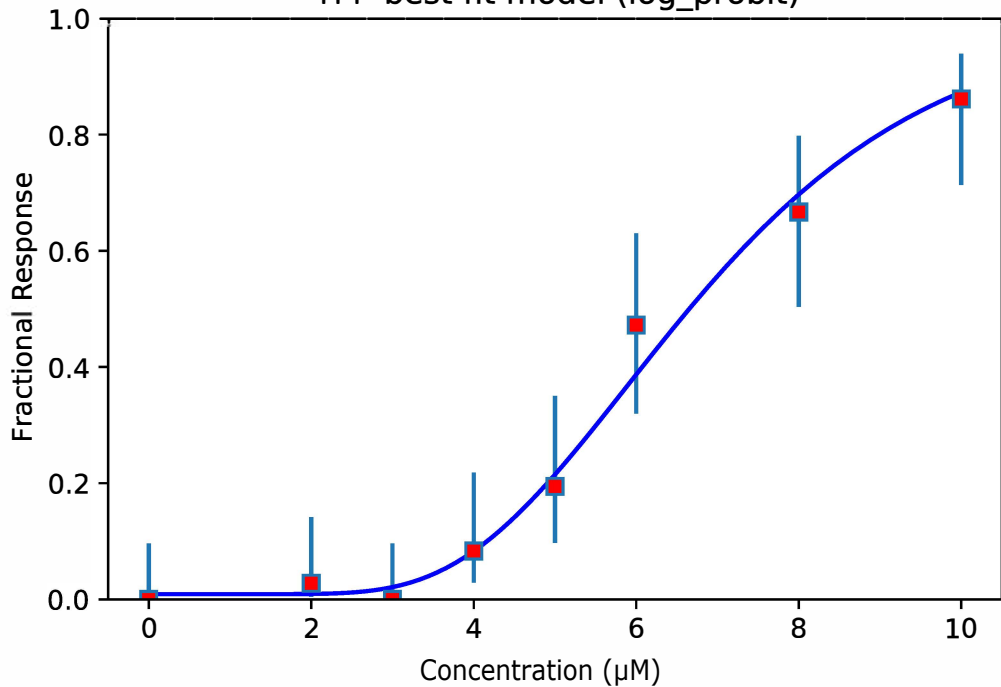



G14 Mix best fit model (weibull)

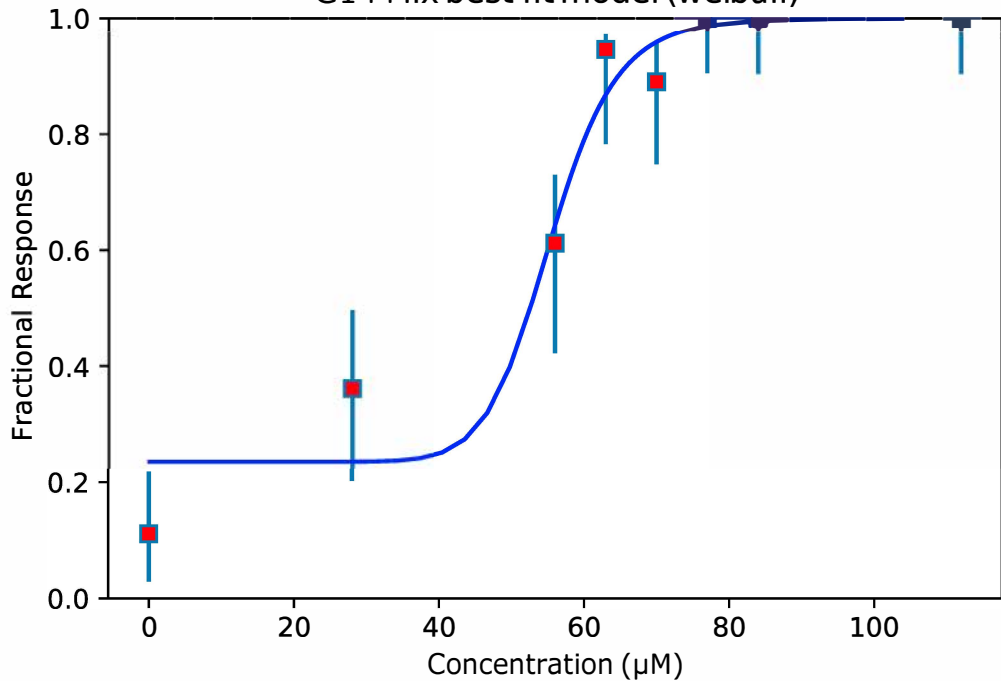



ZF Equi-mix best fit model (log\_logistic)

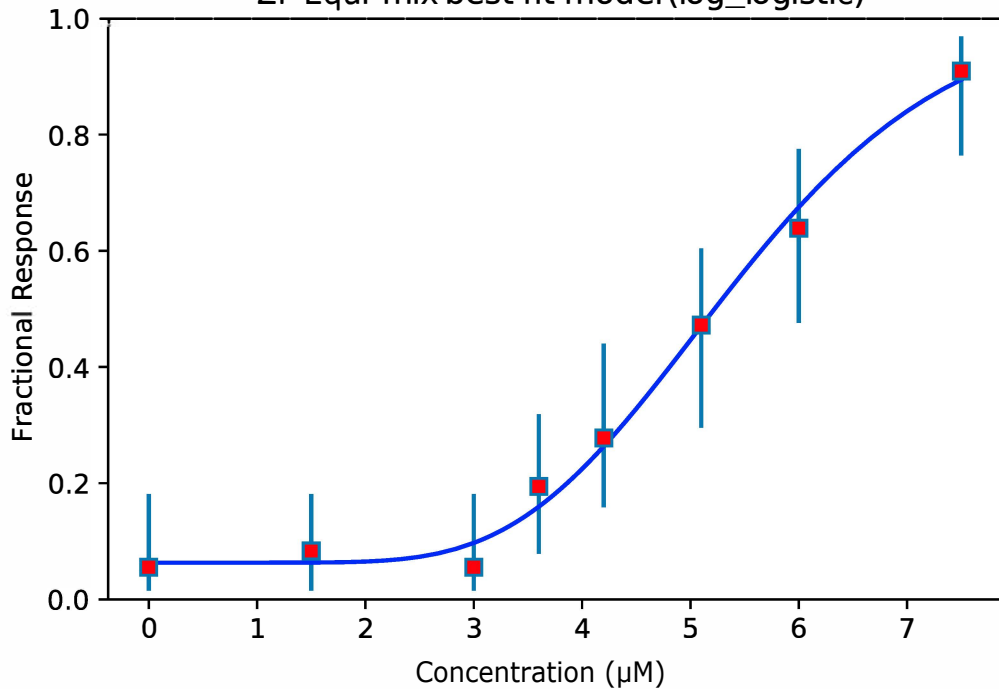



# ZF BMC Mix best fit model (weibull)

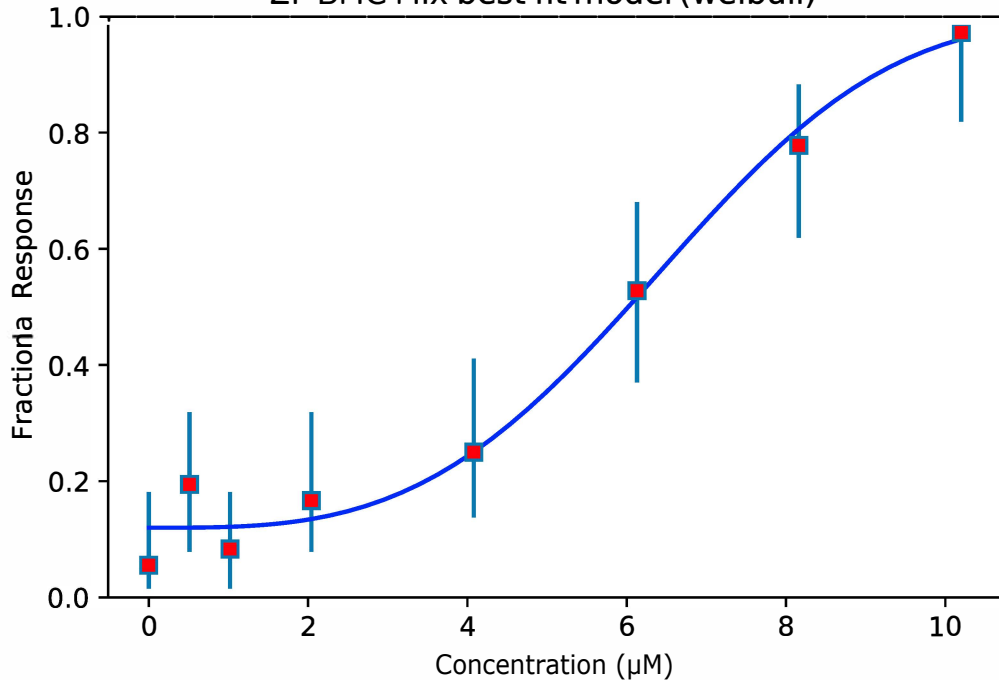

**Figure S7:** Concentration-response curves for each active chemical and mixture. Curve represents any effect in zebrafish morphology screening.



**AHTN**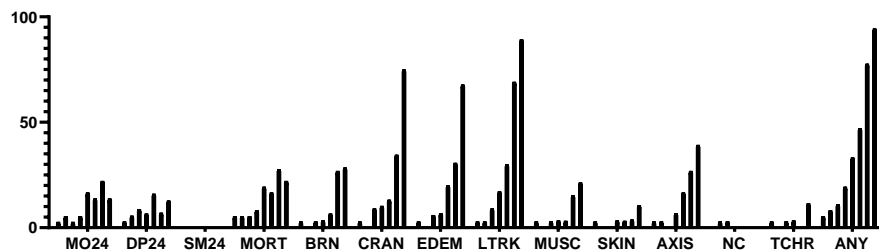**BBP**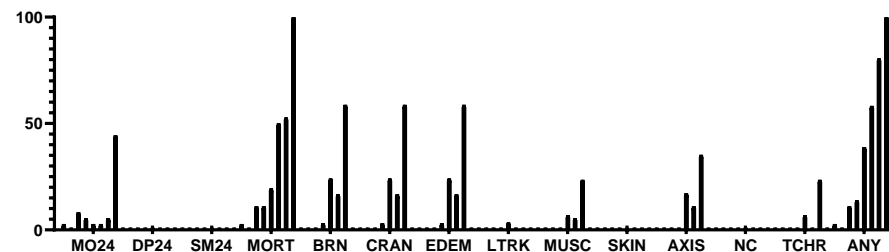**BHT**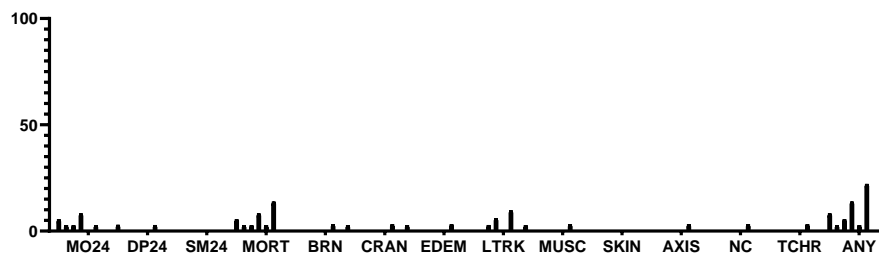**BP**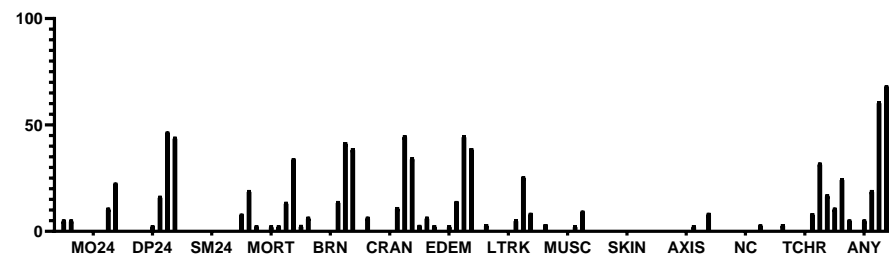**BS**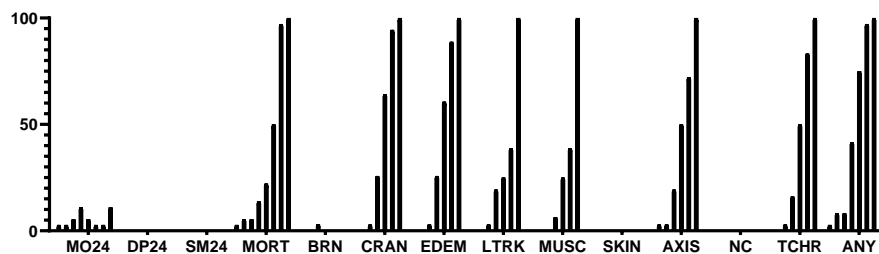**DBP**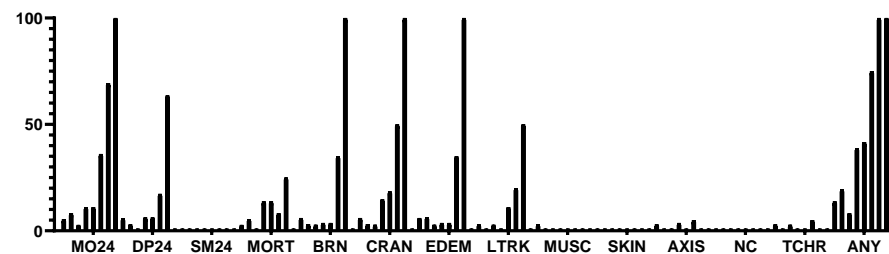



DEET

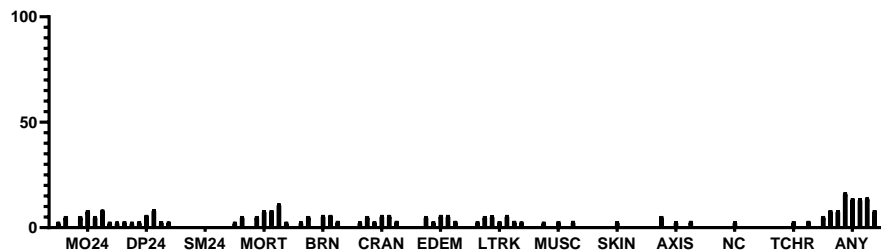

DEHP

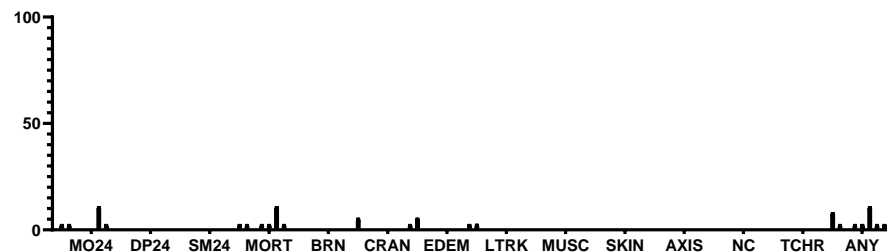

DEP

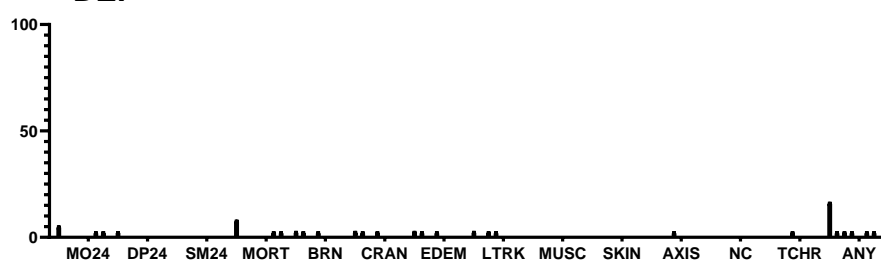

DIBP

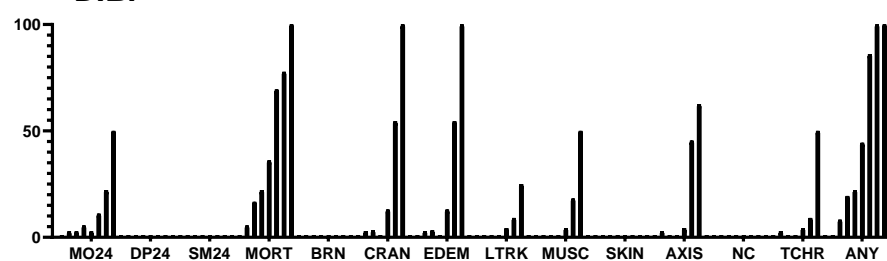

DNP

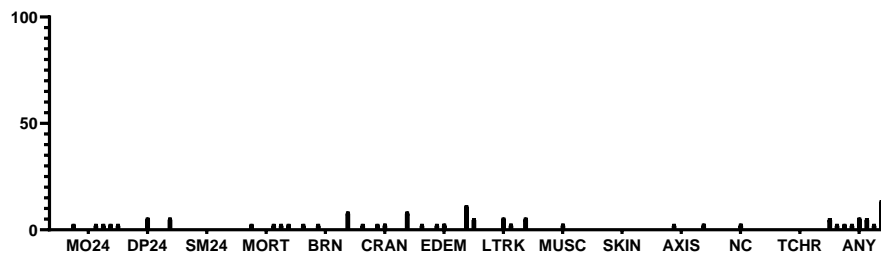

HHCB

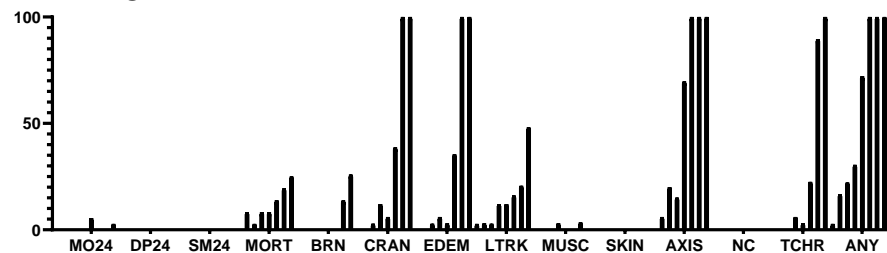



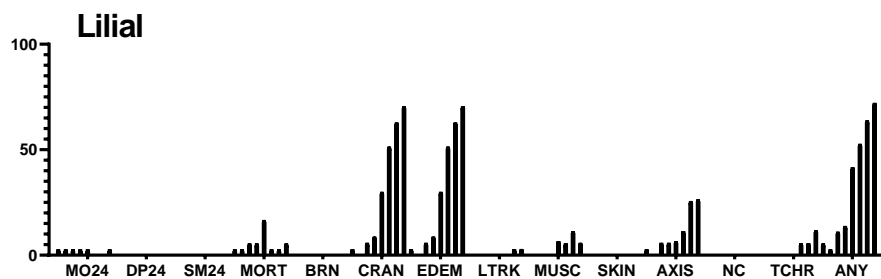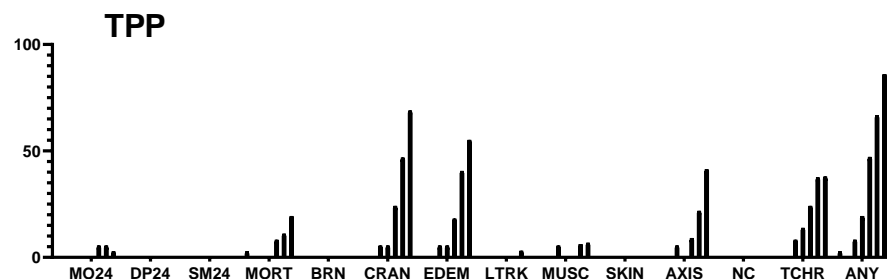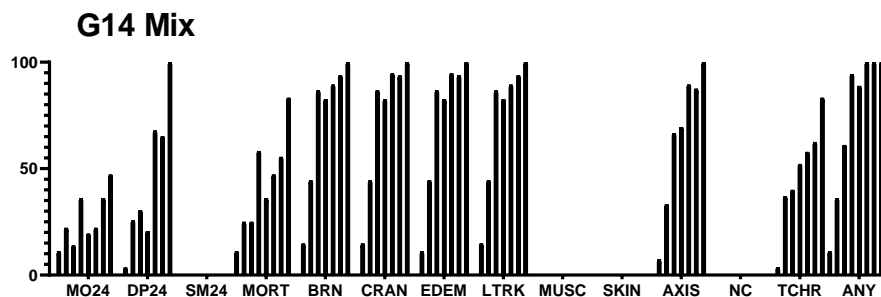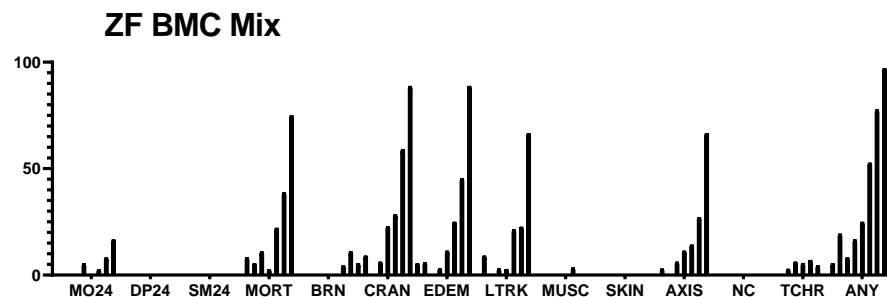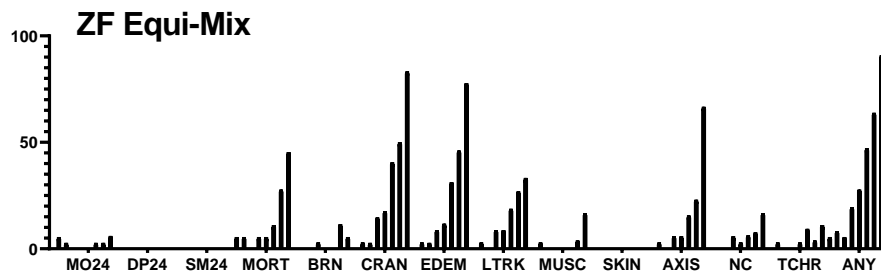

**Figure S8.** Concentration-response bar plots for each endpoint for each chemical from zebrafish morphology screening. The y-axis represents % of animals effected. See Table S1 for description of column identifiers. See Table 4 in the main text for concentration lists for each chemical.



**Table S2:** Percent incidence of each endpoint from morphology screening. Table shows data from three replicate plates (n=12 each) for each chemical. See Table S1 for description of column identifiers.

| chemical.name | concentration (µM) | MO24     | DP24     | SM24 | MORT      | CRAN     | AXIS     | EDEM     | MUSC     | LTRK     | BRN_     | SKIN     | NC__     | TCHR     | any.effect |
|---------------|--------------------|----------|----------|------|-----------|----------|----------|----------|----------|----------|----------|----------|----------|----------|------------|
| AHTN          | 0                  | 2.777778 | 0        | 0    | 5.555556  | 0        | 0        | 0        | 0        | 0        | 0        | 0        | 0        | 0        | 5.56       |
| AHTN          | 2                  | 5.555556 | 2.941176 | 0    | 5.555556  | 2.941176 | 2.941176 | 2.941176 | 2.941176 | 2.941176 | 2.941176 | 2.941176 | 0        | 2.941176 | 8.33       |
| AHTN          | 10                 | 2.777778 | 5.714286 | 0    | 5.555556  | 0        | 2.941176 | 0        | 0        | 2.941176 | 0        | 0        | 2.941176 | 0        | 11.11      |
| AHTN          | 30                 | 5.555556 | 8.823529 | 0    | 8.333333  | 9.090909 | 0        | 6.060606 | 3.030303 | 9.090909 | 3.030303 | 0        | 3.030303 | 3.030303 | 19.44      |
| AHTN          | 50                 | 16.66667 | 6.666667 | 0    | 19.444444 | 10.34483 | 6.896552 | 6.896552 | 3.448276 | 17.24138 | 3.448276 | 3.448276 | 0        | 3.448276 | 33.33      |
| AHTN          | 60                 | 13.88889 | 16.12903 | 0    | 16.66667  | 13.33333 | 16.66667 | 20       | 3.333333 | 30       | 6.666667 | 3.333333 | 0        | 0        | 47.22      |
| AHTN          | 75                 | 22.22222 | 7.142857 | 0    | 27.777778 | 34.61538 | 26.92308 | 30.76923 | 15.38462 | 69.23077 | 26.92308 | 3.846154 | 0        | 11.53846 | 77.78      |
| AHTN          | 100                | 13.88889 | 12.90323 | 0    | 22.222222 | 75       | 39.28571 | 67.85714 | 21.42857 | 89.28571 | 28.57143 | 10.71429 | 0        | 0        | 94.44      |
| BBP           | 0                  | 2.78     | 0        | 0    | 2.78      | 0        | 0        | 0        | 0        | 0        | 0        | 0        | 0        | 0        | 2.78       |
| BBP           | 2.25               | 0        | 0        | 0    | 0         | 0        | 0        | 0        | 0        | 0        | 0        | 0        | 0        | 0        | 0          |
| BBP           | 3                  | 8.33     | 0        | 0    | 11.11     | 0        | 0        | 0        | 0        | 0        | 0        | 0        | 0        | 0        | 11.11      |
| BBP           | 3.5                | 5.56     | 0        | 0    | 11.11     | 3.12     | 0        | 3.12     | 0        | 0        | 0        | 0        | 0        | 0        | 13.89      |
| BBP           | 4                  | 2.78     | 0        | 0    | 19.44     | 24.14    | 17.24    | 24.14    | 6.9      | 3.45     | 0        | 0        | 0        | 6.9      | 38.89      |
| BBP           | 4.5                | 2.78     | 0        | 0    | 50        | 16.67    | 11.11    | 16.67    | 5.56     | 0        | 0        | 0        | 0        | 0        | 58.33      |
| BBP           | 5                  | 5.56     | 0        | 0    | 52.78     | 58.82    | 35.29    | 58.82    | 23.53    | 0        | 0        | 0        | 0        | 23.53    | 80.56      |
| BBP           | 8                  | 44.44    | 0        | 0    | 100       | 0        | 0        | 0        | 0        | 0        | 0        | 0        | 0        | 0        | 100        |
| BHT           | 0                  | 5.555556 | 2.941176 | 0    | 5.555556  | 0        | 0        | 0        | 0        | 0        | 0        | 0        | 0        | 0        | 8.33       |
| BHT           | 1                  | 2.777778 | 0        | 0    | 2.777778  | 0        | 0        | 0        | 0        | 0        | 0        | 0        | 0        | 0        | 2.78       |
| BHT           | 2.54               | 2.777778 | 0        | 0    | 2.777778  | 0        | 0        | 0        | 0        | 2.857143 | 0        | 0        | 0        | 0        | 5.56       |
| BHT           | 6.45               | 8.333333 | 0        | 0    | 8.333333  | 0        | 0        | 0        | 0        | 6.060606 | 0        | 0        | 0        | 0        | 13.89      |
| BHT           | 16.4               | 0        | 0        | 0    | 2.777778  | 0        | 0        | 0        | 0        | 0        | 0        | 0        | 0        | 0        | 2.78       |
| BHT           | 35                 | 2.777778 | 2.857143 | 0    | 13.888889 | 3.225806 | 3.225806 | 3.225806 | 3.225806 | 9.677419 | 3.225806 | 0        | 3.225806 | 3.225806 | 22.22      |
| BHT           | 74.8               | 0        | 0        | 0    | 0         | 0        | 0        | 0        | 0        | 0        | 0        | 0        | 0        | 0        | 0          |
| BHT           | 100                | 0        | 0        | 0    | 0         | 2.777778 | 0        | 0        | 0        | 2.777778 | 2.777778 | 0        | 0        | 0        | 2.78       |
| BP            | 0                  | 5.555556 | 0        | 0    | 8.333333  | 0        | 0        | 3.030303 | 0        | 0        | 3.030303 | 0        | 0        | 0        | 11.11      |
| BP            | 1                  | 5.555556 | 0        | 0    | 19.444444 | 6.896552 | 0        | 6.896552 | 3.448276 | 3.448276 | 6.896552 | 0        | 0        | 3.448276 | 25         |
| BP            | 2.54               | 0        | 0        | 0    | 2.777778  | 0        | 0        | 2.857143 | 0        | 0        | 0        | 0        | 0        | 0        | 5.56       |
| BP            | 6.45               | 0        | 0        | 0    | 0         | 0        | 0        | 0        | 0        | 0        | 0        | 0        | 0        | 0        | 0          |
| BP            | 16.4               | 0        | 2.777778 | 0    | 2.777778  | 0        | 0        | 2.857143 | 0        | 0        | 0        | 0        | 0        | 0        | 5.56       |
| BP            | 35                 | 0        | 16.66667 | 0    | 2.777778  | 11.42857 | 2.857143 | 14.28571 | 2.857143 | 5.714286 | 14.28571 | 0        | 0        | 8.571429 | 19.44      |
| BP            | 74.8               | 11.11111 | 46.875   | 0    | 13.888889 | 45.16129 | 0        | 45.16129 | 9.677419 | 25.80645 | 41.93548 | 0        | 3.225806 | 32.25806 | 61.11      |
| BP            | 100                | 22.85714 | 44.44444 | 0    | 34.285714 | 34.78261 | 8.695652 | 39.13043 | 0        | 8.695652 | 39.13043 | 0        | 0        | 17.3913  | 68.57      |
| BS            | 0                  | 2.78     | 0        | 0    | 2.78      | 0        | 0        | 0        | 0        | 0        | 0        | 0        | 0        | 0        | 2.78       |
| BS            | 5                  | 2.78     | 0        | 0    | 5.56      | 0        | 2.94     | 0        | 0        | 0        | 0        | 0        | 0        | 0        | 8.33       |
| BS            | 10                 | 5.56     | 0        | 0    | 5.56      | 2.94     | 2.94     | 2.94     | 0        | 2.94     | 0        | 0        | 0        | 2.94     | 8.33       |
| BS            | 14                 | 11.11    | 0        | 0    | 13.89     | 25.81    | 19.35    | 25.81    | 6.45     | 19.35    | 3.23     | 0        | 0        | 16.13    | 41.67      |
| BS            | 18                 | 5.56     | 0        | 0    | 22.22     | 64.29    | 50       | 60.71    | 25       | 25       | 0        | 0        | 0        | 50       | 75         |
| BS            | 22                 | 2.78     | 0        | 0    | 50        | 94.44    | 72.22    | 88.89    | 38.89    | 38.89    | 0        | 0        | 0        | 83.33    | 97.22      |
| BS            | 30                 | 2.78     | 0        | 0    | 97.22     | 100      | 100      | 100      | 100      | 100      | 0        | 0        | 0        | 100      | 100        |
| BS            | 50                 | 11.11    | 0        | 0    | 100       | NA       | 100        |
| DBP           | 0                  | 5.555556 | 5.882353 | 0    | 2.777778  | 6.060606 | 3.030303 | 6.060606 | 3.030303 | 3.030303 | 6.060606 | 0        | 0        | 3.030303 | 13.89      |
| DBP           | 1                  | 8.333333 | 3.030303 | 0    | 5.555556  | 3.225806 | 0        | 6.451613 | 0        | 0        | 3.225806 | 0        | 0        | 0        | 19.44      |
| DBP           | 2                  | 2.777778 | 0        | 0    | 0         | 2.857143 | 0        | 2.857143 | 0        | 2.857143 | 2.857143 | 0        | 0        | 2.857143 | 8.33       |



|      |      |          |          |   |           |          |          |          |          |          |          |          |          |          |       |
|------|------|----------|----------|---|-----------|----------|----------|----------|----------|----------|----------|----------|----------|----------|-------|
| DBP  | 3    | 11.11111 | 6.25     | 0 | 13.888889 | 14.81481 | 3.703704 | 3.703704 | 0        | 0        | 3.703704 | 0        | 0        | 0        | 38.89 |
| DBP  | 4    | 11.11111 | 6.25     | 0 | 13.888889 | 18.51852 | 0        | 3.703704 | 0        | 11.11111 | 3.703704 | 0        | 0        | 0        | 41.67 |
| DBP  | 5    | 36.11111 | 17.3913  | 0 | 8.333333  | 50       | 5        | 35       | 0        | 20       | 35       | 0        | 0        | 5        | 75    |
| DBP  | 10   | 69.44444 | 63.63636 | 0 | 25        | 100      | 0        | 100      | 0        | 50       | 100      | 0        | 0        | 0        | 100   |
| DBP  | 20   | 100      | 0        | 0 | 0         | 0        | 0        | 0        | 0        | 0        | 0        | 0        | 0        | 0        | 100   |
| DEET | 0    | 2.777778 | 2.857143 | 0 | 2.777778  | 0        | 0        | 0        | 0        | 0        | 0        | 0        | 0        | 0        | 5.56  |
| DEET | 1    | 5.555556 | 2.941176 | 0 | 5.555556  | 2.941176 | 0        | 0        | 0        | 2.941176 | 2.941176 | 0        | 0        | 0        | 8.33  |
| DEET | 2.54 | 0        | 2.777778 | 0 | 0         | 5.555556 | 5.555556 | 5.555556 | 2.777778 | 5.555556 | 5.555556 | 0        | 0        | 0        | 8.33  |
| DEET | 6.45 | 5.555556 | 2.941176 | 0 | 5.555556  | 2.941176 | 0        | 2.941176 | 0        | 5.882353 | 0        | 0        | 0        | 0        | 16.67 |
| DEET | 16.4 | 8.333333 | 6.060606 | 0 | 8.333333  | 6.060606 | 3.030303 | 6.060606 | 3.030303 | 3.030303 | 6.060606 | 3.030303 | 3.030303 | 3.030303 | 13.89 |
| DEET | 35   | 5.555556 | 8.823529 | 0 | 8.333333  | 6.060606 | 0        | 6.060606 | 0        | 6.060606 | 6.060606 | 0        | 0        | 0        | 13.89 |
| DEET | 74.8 | 8.571429 | 3.125    | 0 | 11.428571 | 3.225806 | 3.225806 | 3.225806 | 3.225806 | 3.225806 | 3.225806 | 0        | 0        | 3.225806 | 14.29 |
| DEET | 100  | 2.777778 | 2.857143 | 0 | 2.777778  | 0        | 0        | 0        | 0        | 2.857143 | 0        | 0        | 0        | 0        | 8.33  |
| DEHP | 0    | 2.78     | 0        | 0 | 2.78      | 5.71     | 0        | 5.71     | 0        | 2.86     | 0        | 0        | 0        | 0        | 8.33  |
| DEHP | 1    | 2.78     | 0        | 0 | 2.78      | 0        | 0        | 0        | 0        | 0        | 0        | 0        | 0        | 0        | 2.78  |
| DEHP | 3    | 0        | 0        | 0 | 0         | 0        | 0        | 0        | 0        | 0        | 0        | 0        | 0        | 0        | 0     |
| DEHP | 5    | 0        | 0        | 0 | 2.78      | 0        | 0        | 0        | 0        | 0        | 0        | 0        | 0        | 0        | 2.78  |
| DEHP | 10   | 0        | 0        | 0 | 2.78      | 0        | 0        | 0        | 0        | 0        | 0        | 0        | 0        | 0        | 2.78  |
| DEHP | 20   | 11.11    | 0        | 0 | 11.11     | 0        | 0        | 0        | 0        | 0        | 0        | 0        | 0        | 0        | 11.11 |
| DEHP | 40   | 2.78     | 0        | 0 | 2.78      | 0        | 0        | 0        | 0        | 0        | 0        | 0        | 0        | 0        | 2.78  |
| DEHP | 80   | 0        | 0        | 0 | 0         | 2.78     | 0        | 2.78     | 0        | 0        | 0        | 0        | 0        | 0        | 2.78  |
| DEP  | 0    | 5.555556 | 2.941176 | 0 | 8.333333  | 3.030303 | 0        | 3.030303 | 0        | 3.030303 | 3.030303 | 0        | 0        | 0        | 16.67 |
| DEP  | 1    | 0        | 0        | 0 | 0         | 2.777778 | 0        | 2.777778 | 0        | 0        | 2.777778 | 0        | 0        | 0        | 2.78  |
| DEP  | 2.54 | 0        | 0        | 0 | 0         | 0        | 0        | 0        | 0        | 2.777778 | 0        | 0        | 0        | 0        | 2.78  |
| DEP  | 6.45 | 0        | 0        | 0 | 0         | 2.777778 | 2.777778 | 2.777778 | 0        | 2.777778 | 2.777778 | 0        | 0        | 2.777778 | 2.78  |
| DEP  | 16.4 | 0        | 0        | 0 | 0         | 0        | 0        | 0        | 0        | 0        | 0        | 0        | 0        | 0        | 0     |
| DEP  | 35   | 2.777778 | 0        | 0 | 2.777778  | 0        | 0        | 0        | 0        | 0        | 0        | 0        | 0        | 0        | 2.78  |
| DEP  | 74.8 | 2.777778 | 0        | 0 | 2.777778  | 0        | 0        | 0        | 0        | 0        | 0        | 0        | 0        | 0        | 2.78  |
| DEP  | 100  | 0        | 0        | 0 | 0         | 0        | 0        | 0        | 0        | 0        | 0        | 0        | 0        | 0        | 0     |
| DIBP | 0    | 0        | 0        | 0 | 0         | 0        | 0        | 0        | 0        | 0        | 0        | 0        | 0        | 0        | 0     |
| DIBP | 2    | 2.78     | 0        | 0 | 5.56      | 2.94     | 2.94     | 2.94     | 0        | 0        | 0        | 0        | 0        | 2.94     | 8.33  |
| DIBP | 4    | 2.78     | 0        | 0 | 16.67     | 3.33     | 0        | 3.33     | 0        | 0        | 0        | 0        | 0        | 0        | 19.44 |
| DIBP | 5    | 5.56     | 0        | 0 | 22.22     | 0        | 0        | 0        | 0        | 0        | 0        | 0        | 0        | 0        | 22.22 |
| DIBP | 6    | 2.78     | 0        | 0 | 36.11     | 13.04    | 4.35     | 13.04    | 4.35     | 4.35     | 0        | 0        | 0        | 4.35     | 44.44 |
| DIBP | 8    | 11.11    | 0        | 0 | 69.44     | 54.55    | 45.45    | 54.55    | 18.18    | 9.09     | 0        | 0        | 0        | 9.09     | 86.11 |
| DIBP | 10   | 22.22    | 0        | 0 | 77.78     | 100      | 62.5     | 100      | 50       | 25       | 0        | 0        | 0        | 50       | 100   |
| DIBP | 15   | 50       | 0        | 0 | 100       | NA       | 100   |
| DNP  | 0    | 0        | 2.777778 | 0 | 0         | 0        | 0        | 0        | 0        | 5.555556 | 0        | 0        | 0        | 0        | 5.56  |
| DNP  | 2    | 0        | 0        | 0 | 0         | 2.777778 | 0        | 2.777778 | 0        | 0        | 2.777778 | 0        | 0        | 0        | 2.78  |
| DNP  | 10   | 2.777778 | 0        | 0 | 2.777778  | 0        | 0        | 0        | 0        | 0        | 0        | 0        | 0        | 0        | 2.78  |
| DNP  | 30   | 0        | 0        | 0 | 0         | 2.777778 | 2.777778 | 2.777778 | 0        | 0        | 2.777778 | 0        | 0        | 0        | 2.78  |
| DNP  | 50   | 0        | 5.714286 | 0 | 0         | 2.857143 | 0        | 2.857143 | 2.857143 | 5.714286 | 0        | 0        | 2.857143 | 0        | 5.71  |
| DNP  | 70   | 2.777778 | 0        | 0 | 2.777778  | 0        | 0        | 0        | 0        | 2.857143 | 0        | 0        | 0        | 0        | 5.56  |
| DNP  | 80   | 2.777778 | 0        | 0 | 2.777778  | 0        | 0        | 0        | 0        | 0        | 0        | 0        | 0        | 0        | 2.78  |



|             |       |          |          |   |          |          |          |          |       |          |          |   |   |          |       |
|-------------|-------|----------|----------|---|----------|----------|----------|----------|-------|----------|----------|---|---|----------|-------|
| DNP         | 100   | 2.777778 | 5.714286 | 0 | 2.777778 | 8.571429 | 2.857143 | 11.42857 | 0     | 5.714286 | 8.571429 | 0 | 0 | 0        | 13.89 |
| G14 Mix     | 0     | 11.11111 | 0        | 0 | 11.11111 | 0        | 0        | 0        | 0     | 0        | 0        | 0 | 0 | 0        | 11.11 |
| G14 Mix     | 28    | 22.22222 | 3.571429 | 0 | 25       | 14.81481 | 7.407407 | 11.11111 | 0     | 14.81481 | 14.81481 | 0 | 0 | 3.703704 | 36.11 |
| G14 Mix     | 56    | 13.88889 | 25.80645 | 0 | 25       | 44.44444 | 33.33333 | 44.44444 | 0     | 44.44444 | 44.44444 | 0 | 0 | 37.03704 | 61.11 |
| G14 Mix     | 63    | 36.11111 | 30.43478 | 0 | 58.33333 | 86.66667 | 66.66667 | 86.66667 | 0     | 86.66667 | 86.66667 | 0 | 0 | 40       | 94.44 |
| G14 Mix     | 70    | 19.44444 | 20.68966 | 0 | 36.11111 | 82.6087  | 69.56522 | 82.6087  | 0     | 82.6087  | 82.6087  | 0 | 0 | 52.17391 | 88.89 |
| G14 Mix     | 77    | 22.22222 | 67.85714 | 0 | 47.22222 | 94.73684 | 89.47368 | 94.73684 | 0     | 89.47368 | 89.47368 | 0 | 0 | 57.89474 | 100   |
| G14 Mix     | 84    | 36.11111 | 65.21739 | 0 | 55.55556 | 93.75    | 87.5     | 93.75    | 0     | 93.75    | 93.75    | 0 | 0 | 62.5     | 100   |
| G14 Mix     | 112   | 47.22222 | 100      | 0 | 83.33333 | 100      | 100      | 100      | 0     | 100      | 100      | 0 | 0 | 83.33333 | 100   |
| HHCb        | 0     | 0        | 0        | 0 | 0        | 0        | 0        | 0        | 0     | 2.78     | 0        | 0 | 0 | 0        | 2.78  |
| HHCb        | 10    | 0        | 0        | 0 | 8.33     | 0        | 6.06     | 0        | 0     | 3.03     | 0        | 0 | 0 | 0        | 16.67 |
| HHCb        | 14    | 0        | 0        | 0 | 2.78     | 2.86     | 20       | 2.86     | 0     | 2.86     | 0        | 0 | 0 | 0        | 22.22 |
| HHCb        | 16    | 0        | 0        | 0 | 8.33     | 12.12    | 15.15    | 6.06     | 3.03  | 12.12    | 0        | 0 | 0 | 6.06     | 30.56 |
| HHCb        | 20    | 5.56     | 0        | 0 | 8.33     | 6.06     | 69.7     | 3.03     | 0     | 12.12    | 0        | 0 | 0 | 3.03     | 72.22 |
| HHCb        | 24    | 0        | 0        | 0 | 13.89    | 38.71    | 100      | 35.48    | 0     | 16.13    | 0        | 0 | 0 | 22.58    | 100   |
| HHCb        | 28    | 0        | 0        | 0 | 19.44    | 100      | 100      | 100      | 3.45  | 20.69    | 13.79    | 0 | 0 | 89.66    | 100   |
| HHCb        | 32    | 2.78     | 0        | 0 | 25       | 100      | 100      | 100      | 0     | 48.15    | 25.93    | 0 | 0 | 100      | 100   |
| Lilial      | 0     | 2.78     | 0        | 0 | 2.78     | 2.86     | 2.86     | 2.86     | 0     | 0        | 0        | 0 | 0 | 0        | 5.56  |
| Lilial      | 20    | 2.78     | 0        | 0 | 2.78     | 0        | 0        | 0        | 0     | 0        | 0        | 0 | 0 | 0        | 2.78  |
| Lilial      | 40    | 2.78     | 0        | 0 | 5.56     | 5.88     | 5.88     | 5.88     | 0     | 0        | 0        | 0 | 0 | 0        | 11.11 |
| Lilial      | 60    | 2.78     | 0        | 0 | 5.56     | 8.82     | 5.88     | 8.82     | 0     | 0        | 0        | 0 | 0 | 0        | 13.89 |
| Lilial      | 70    | 2.78     | 0        | 0 | 16.67    | 30       | 6.67     | 30       | 6.67  | 0        | 0        | 0 | 0 | 0        | 41.67 |
| Lilial      | 80    | 0        | 0        | 0 | 2.78     | 51.43    | 11.43    | 51.43    | 5.71  | 0        | 0        | 0 | 0 | 5.71     | 52.78 |
| Lilial      | 90    | 0        | 0        | 0 | 2.78     | 62.86    | 25.71    | 62.86    | 11.43 | 2.86     | 0        | 0 | 0 | 5.71     | 63.89 |
| Lilial      | 100   | 2.78     | 0        | 0 | 5.56     | 70.59    | 26.47    | 70.59    | 5.88  | 2.94     | 0        | 0 | 0 | 11.76    | 72.22 |
| TPP         | 0     | 0        | 0        | 0 | 0        | 0        | 0        | 0        | 0     | 0        | 0        | 0 | 0 | 0        | 0     |
| TPP         | 2     | 0        | 0        | 0 | 2.78     | 0        | 0        | 0        | 0     | 0        | 0        | 0 | 0 | 0        | 2.78  |
| TPP         | 3     | 0        | 0        | 0 | 0        | 0        | 0        | 0        | 0     | 0        | 0        | 0 | 0 | 0        | 0     |
| TPP         | 4     | 0        | 0        | 0 | 0        | 5.56     | 5.56     | 5.56     | 5.56  | 0        | 0        | 0 | 0 | 8.33     | 8.33  |
| TPP         | 5     | 0        | 0        | 0 | 0        | 5.56     | 0        | 5.56     | 0     | 0        | 0        | 0 | 0 | 13.89    | 19.44 |
| TPP         | 6     | 5.56     | 0        | 0 | 8.33     | 24.24    | 9.09     | 18.18    | 0     | 0        | 0        | 0 | 0 | 24.24    | 47.22 |
| TPP         | 8     | 5.56     | 0        | 0 | 11.11    | 46.88    | 21.88    | 40.62    | 6.25  | 3.12     | 0        | 0 | 0 | 37.5     | 66.67 |
| TPP         | 10    | 2.78     | 0        | 0 | 19.44    | 68.97    | 41.38    | 55.17    | 6.9   | 0        | 0        | 0 | 0 | 37.93    | 86.11 |
| ZF BMC Mix  | 0     | 0        | 0        | 0 | 0        | 5.56     | 0        | 5.56     | 0     | 0        | 0        | 0 | 0 | 0        | 5.56  |
| ZF BMC Mix  | 0.511 | 0        | 0        | 0 | 8.33     | 9.09     | 3.03     | 6.06     | 0     | 9.09     | 0        | 0 | 0 | 0        | 19.44 |
| ZF BMC Mix  | 1.02  | 0        | 0        | 0 | 5.56     | 0        | 0        | 0        | 0     | 0        | 0        | 0 | 0 | 2.94     | 8.33  |
| ZF BMC Mix  | 2.041 | 5.56     | 0        | 0 | 11.11    | 6.25     | 6.25     | 3.12     | 0     | 3.12     | 0        | 0 | 0 | 6.25     | 16.67 |
| ZF BMC Mix  | 4.018 | 0        | 0        | 0 | 2.78     | 22.86    | 11.43    | 11.43    | 0     | 2.86     | 0        | 0 | 0 | 5.71     | 25    |
| ZF BMC Mix  | 6.13  | 2.78     | 0        | 0 | 22.22    | 28.57    | 14.29    | 25       | 3.57  | 21.43    | 0        | 0 | 0 | 7.14     | 52.78 |
| ZF BMC Mix  | 8.16  | 8.33     | 0        | 0 | 38.89    | 59.09    | 27.27    | 45.45    | 0     | 22.73    | 4.55     | 0 | 0 | 4.55     | 77.78 |
| ZF BMC Mix  | 10.2  | 16.67    | 0        | 0 | 75       | 88.89    | 66.67    | 88.89    | 0     | 66.67    | 11.11    | 0 | 0 | 0        | 97.22 |
| ZF Equi-mix | 0     | 5.56     | 0        | 0 | 5.56     | 0        | 0        | 0        | 0     | 0        | 0        | 0 | 0 | 0        | 5.56  |
| ZF Equi-mix | 1.5   | 2.78     | 0        | 0 | 5.56     | 2.94     | 2.94     | 2.94     | 2.94  | 2.94     | 0        | 0 | 0 | 2.94     | 8.33  |
| ZF Equi-mix | 3     | 0        | 0        | 0 | 0        | 2.78     | 0        | 2.78     | 0     | 0        | 0        | 0 | 0 | 0        | 5.56  |



|             |     |      |   |   |       |       |       |       |       |       |       |   |       |       |       |
|-------------|-----|------|---|---|-------|-------|-------|-------|-------|-------|-------|---|-------|-------|-------|
| ZF Equi-mix | 3.6 | 0    | 0 | 0 | 5.56  | 14.71 | 5.88  | 8.82  | 0     | 8.82  | 2.94  | 0 | 5.88  | 0     | 19.44 |
| ZF Equi-mix | 4.2 | 0    | 0 | 0 | 5.56  | 17.65 | 5.88  | 11.76 | 0     | 8.82  | 0     | 0 | 2.94  | 2.94  | 27.78 |
| ZF Equi-mix | 5.1 | 2.78 | 0 | 0 | 11.11 | 40.62 | 15.62 | 31.25 | 0     | 18.75 | 0     | 0 | 6.25  | 9.38  | 47.22 |
| ZF Equi-mix | 6   | 2.78 | 0 | 0 | 27.78 | 50    | 23.08 | 46.15 | 3.85  | 26.92 | 11.54 | 0 | 7.69  | 3.85  | 63.89 |
| ZF Equi-mix | 7.5 | 6.06 | 0 | 0 | 45.45 | 83.33 | 66.67 | 77.78 | 16.67 | 33.33 | 5.56  | 0 | 16.67 | 11.11 | 90.91 |



**Table S3:** Percent cell viability and cytotoxicity in NHBE. Table shows data from two replicate plates (n=6 each) for each chemical. X = not tested.

| Treatment Group   | Concentration (μM) | % Cytotoxicity<br>(normalized to<br>vehicle control) | SD       | % Cell<br>viability<br>(normalized<br>to vehicle<br>control) | SD       |
|-------------------|--------------------|------------------------------------------------------|----------|--------------------------------------------------------------|----------|
| BBP               | 10                 | 84.93464052                                          | 13.47355 | 89.9803728                                                   | 39.91846 |
| BBP               | 25                 | 93.03921569                                          | 45.98058 | 90.9794952                                                   | 45.37218 |
| BBP               | 50                 | 81.37254902                                          | 43.93242 | 105.565117                                                   | 14.63564 |
| BBP               | 75                 | 99.70588235                                          | 47.84519 | 106.855072                                                   | 9.574055 |
| BBP               | 100                | 82.48366013                                          | 38.86088 | 100.321745                                                   | 9.444511 |
| BEHP              | 10                 | 119.0147059                                          | 92.27305 | 103.610893                                                   | 8.047967 |
| BEHP              | 25                 | 65.5                                                 | 39.05772 | 112.360227                                                   | 9.016499 |
| BEHP              | 50                 | 77.26470588                                          | 73.61252 | 119.521371                                                   | 11.88143 |
| BEHP              | 75                 | 50.29411765                                          | 23.05114 | 114.097602                                                   | 8.348966 |
| BEHP              | 100                | 65.20588235                                          | 34.57175 | 99.7306459                                                   | 19.54669 |
| benzophenone      | 10                 | 76.66666667                                          | 33.83066 | 82.9328401                                                   | 40.74113 |
| benzophenone      | 25                 | 88.9869281                                           | 14.01949 | 101.286086                                                   | 6.305546 |
| benzophenone      | 50                 | 73.9869281                                           | 26.75897 | 113.526937                                                   | 3.742786 |
| benzophenone      | 75                 | 108.8562092                                          | 84.89643 | 90.6760432                                                   | 44.66076 |
| benzophenone      | 100                | 76.07843137                                          | 6.820599 | 103.184381                                                   | 13.61852 |
| benzyl salicylate | 10                 | 62.61437908                                          | 5.859651 | 110.463106                                                   | 6.054533 |
| benzyl salicylate | 25                 | 70.65359477                                          | 26.33609 | 107.107725                                                   | 9.469752 |
| benzyl salicylate | 50                 | 63.23529412                                          | 10.65682 | 90.4030113                                                   | 44.47676 |
| benzyl salicylate | 75                 | 103.1699346                                          | 60.8678  | 72.2764167                                                   | 56.80649 |
| benzyl salicylate | 100                | 77.18954248                                          | 12.79638 | 104.805201                                                   | 10.28514 |
| BHT               | 10                 | 89.5021645                                           | 31.80139 | 91.2866605                                                   | 14.91296 |
| BHT               | 25                 | 97.8219697                                           | 32.91195 | 83.9832077                                                   | 6.767774 |
| BHT               | 50                 | 104.586039                                           | 49.01575 | 78.6898805                                                   | 5.51769  |
| BHT               | 75                 | 175.1352814                                          | 54.24609 | 68.7577369                                                   | 9.50328  |
| BHT               | 100                | 1218.295455                                          | 644.672  | 69.5670553                                                   | 18.4819  |
| BHT               | 200                | 4164.109848                                          | 965.0683 | 17.3965904                                                   | 8.595863 |
| DEET              | 10                 | 84.83660131                                          | 20.06091 | 105.285534                                                   | 15.51583 |
| DEET              | 25                 | 69.01960784                                          | 9.460657 | 109.840339                                                   | 16.25336 |
| DEET              | 50                 | 69.21568627                                          | 25.18978 | 103.464348                                                   | 13.2821  |
| DEET              | 75                 | 77.61437908                                          | 21.63463 | 109.49146                                                    | 9.077438 |
| DEET              | 100                | 85.71895425                                          | 17.99373 | 100.866135                                                   | 12.08429 |
| DEP               | 10                 | 72.05882353                                          | 16.87539 | 105.984607                                                   | 9.101288 |
| DEP               | 25                 | 74                                                   | 18.68778 | 108.833245                                                   | 13.61769 |
| DEP               | 50                 | 57.19117647                                          | 19.30869 | 110.03181                                                    | 16.33637 |
| DEP               | 75                 | 66.85294118                                          | 19.07888 | 110.063558                                                   | 8.788537 |
| DEP               | 100                | 94.30882353                                          | 45.72756 | 105.641017                                                   | 21.66387 |
| DiBP              | 10                 | 36.34090909                                          | 36.89292 | 121.00094                                                    | 10.53565 |
| DiBP              | 25                 | 52.0530303                                           | 58.01729 | 110.099155                                                   | 9.889056 |
| DiBP              | 50                 | 51.94848485                                          | 63.59185 | 97.9606036                                                   | 9.919028 |
| DiBP              | 75                 | 43.36212121                                          | 57.44561 | 104.918257                                                   | 4.678393 |
| DiBP              | 100                | 65.12121212                                          | 79.63776 | 90.9451539                                                   | 17.78272 |
| DiBP              | 200                | 184.1257576                                          | 192.7245 | 72.3858922                                                   | 15.36599 |
| DnBP              | 10                 | 70.64705882                                          | 15.42253 | 109.610767                                                   | 19.20243 |
| DnBP              | 25                 | 119.7058824                                          | 36.9975  | 111.557907                                                   | 14.00782 |
| DnBP              | 50                 | 104.8235294                                          | 53.0042  | 104.391442                                                   | 12.75152 |
| DnBP              | 75                 | 100.5441176                                          | 42.60428 | 111.471932                                                   | 2.972936 |
| DnBP              | 100                | 69.91176471                                          | 21.45818 | 106.104978                                                   | 7.793492 |



|                 |     |             |          |            |          |
|-----------------|-----|-------------|----------|------------|----------|
| DnNP            | 10  | 109.3409091 | 35.66491 | 118.546957 | 7.514615 |
| DnNP            | 25  | 127.8636364 | 67.94964 | 110.913996 | 13.08799 |
| DnNP            | 50  | 83.54545455 | 33.8554  | 116.973114 | 10.65444 |
| DnNP            | 75  | 91.31818182 | 34.23272 | 111.826255 | 5.638591 |
| DnNP            | 100 | 143.2045455 | 31.9265  | 106.554618 | 10.60331 |
| DnNP            | 200 | 125.8409091 | 25.77733 | 107.436102 | 15.04415 |
| G14             | 28  | 191.1661255 | 145.0558 | 65.4303339 | 26.29084 |
| G14             | 70  | 168.655303  | 117.2286 | 42.0348925 | 13.04575 |
| G14             | 140 | 177.0427489 | 53.32214 | 22.0275328 | 9.716909 |
| G14             | 210 | 413.6498918 | 116.9145 | 9.46150464 | 5.556503 |
| G14             | 280 | 321.4150433 | 77.95441 | 52.1853239 | 22.32214 |
| galaxolide      | 10  | 124.6482684 | 97.64068 | 70.0204211 | 10.12609 |
| galaxolide      | 25  | 136.8235931 | 45.16144 | 71.0542457 | 10.38532 |
| galaxolide      | 50  | 360.8901515 | 34.58411 | 50.0791698 | 12.82163 |
| galaxolide      | 75  | 352.732684  | 176.0609 | 25.7330948 | 7.329411 |
| galaxolide      | 100 | 1124.512987 | 403.3889 | 39.0061233 | 4.307021 |
| galaxolide      | 200 | 5452.083333 | 214.1784 | 0.39176959 | 0.175241 |
| lilial          | 10  | 76.14379085 | 29.78396 | 112.473206 | 10.38678 |
| lilial          | 25  | 85          | 24.11677 | 109.237487 | 13.04749 |
| lilial          | 50  | 74.64052288 | 13.62352 | 106.39943  | 10.49225 |
| lilial          | 75  | 81.2745098  | 35.21009 | 106.893491 | 6.131873 |
| lilial          | 100 | 139.7058824 | 120.7183 | 106.971888 | 6.409457 |
| NHBE BMC Mix    | 12  | X           | NA       | 110.536908 | 9.501224 |
| NHBE BMC Mix    | 23  | X           | NA       | 102.313311 | 7.562011 |
| NHBE BMC Mix    | 58  | X           | NA       | 94.598601  | 3.89933  |
| NHBE BMC Mix    | 92  | X           | NA       | 47.906738  | 16.43097 |
| NHBE BMC Mix    | 115 | X           | NA       | 48.5063998 | 3.482424 |
| NHBE BMC Mix    | 173 | X           | NA       | 27.1470688 | 3.99436  |
| NHBE BMC Mix    | 230 | X           | NA       | 13.5151029 | 6.120792 |
| NHBE Equi-Mix   | 30  | 100.0405844 | 35.06959 | 64.7342761 | 13.68268 |
| NHBE Equi-Mix   | 75  | 771.3338745 | 384.8537 | 38.6674364 | 6.946066 |
| NHBE Equi-Mix   | 150 | 4366.734307 | 803.8349 | 20.219014  | 6.004913 |
| NHBE Equi-Mix   | 225 | 4536.539502 | 1004.149 | 4.31157289 | 5.243164 |
| NHBE Equi-Mix   | 300 | 4593.249459 | 1149.5   | 0.3952752  | 0.272452 |
| tonalide        | 10  | 82.98160173 | 16.0918  | 101.519964 | 9.62639  |
| tonalide        | 25  | 117.3160173 | 33.81512 | 94.626949  | 10.41703 |
| tonalide        | 50  | 741.8425325 | 422.7325 | 75.0003136 | 12.97595 |
| tonalide        | 75  | 1756.953463 | 570.3399 | 64.7954273 | 7.973607 |
| tonalide        | 100 | 3565.354437 | 963.4538 | 39.224567  | 8.219308 |
| tonalide        | 200 | 4248.660714 | 1058.274 | 6.89529211 | 2.82307  |
| TPP             | 10  | 74.49545455 | 121.1037 | 101.622347 | 8.174006 |
| TPP             | 25  | 80.34393939 | 143.1379 | 93.1422202 | 7.59722  |
| TPP             | 50  | 49.24090909 | 49.71872 | 105.588877 | 16.42341 |
| TPP             | 75  | 51.51515152 | 58.96488 | 101.378472 | 9.074086 |
| TPP             | 100 | 106.8757576 | 111.0092 | 75.1920659 | 7.114982 |
| TPP             | 200 | 92.32272727 | 96.04242 | 72.9138189 | 6.676885 |
| Vehicle Control | 0   | 100         | 11.63325 | 100        | 11.56468 |
| Vehicle Control | 0   | 100         | 30.45223 | 100        | 13.5849  |
| Vehicle Control | 0   | 100         | 19.87257 | 100        | 10.18003 |
| Vehicle Control | 0   | 100         | 38.48331 | 100        | 7.826078 |



**Table S4:** Lowest effect level (LEL) for each endpoint across zebrafish and NHBE screening platforms for each chemical and mixture. Concentration units are in micromolar. X = not tested. See Table S1 for description of column identifiers.

[illegible]



**Table S5.** Nominal exposure concentrations of individual components in BMC mix for each model system (μM)

| Chemical               | Zebrafish |       |       |               | NHBE |      |       |              |
|------------------------|-----------|-------|-------|---------------|------|------|-------|--------------|
|                        | BBP       | DBP   | DIBP  | Zfish BMC Mix | AHTN | HHCB | BHT   | NHBE BMC Mix |
| Exposure Concentration | 0.165     | 0.172 | 0.174 | 0.511         | 4.2  | 2.1  | 5.2   | 11.5         |
|                        | 0.329     | 0.343 | 0.348 | 1.02          | 8.5  | 4.2  | 10.3  | 23.0         |
|                        | 0.659     | 0.686 | 0.696 | 2.041         | 21.2 | 10.6 | 25.8  | 57.5         |
|                        | 1.32      | 1.37  | 1.39  | 4.08          | 34.0 | 16.9 | 41.2  | 92.0         |
|                        | 1.98      | 2.06  | 2.09  | 6.13          | 42.5 | 21.1 | 51.5  | 115.1        |
|                        | 2.63      | 2.75  | 2.78  | 8.16          | 63.7 | 31.7 | 77.3  | 172.6        |
|                        | 3.29      | 3.43  | 3.48  | 10.20         | 84.9 | 42.2 | 103.0 | 230.1        |



# AHTN

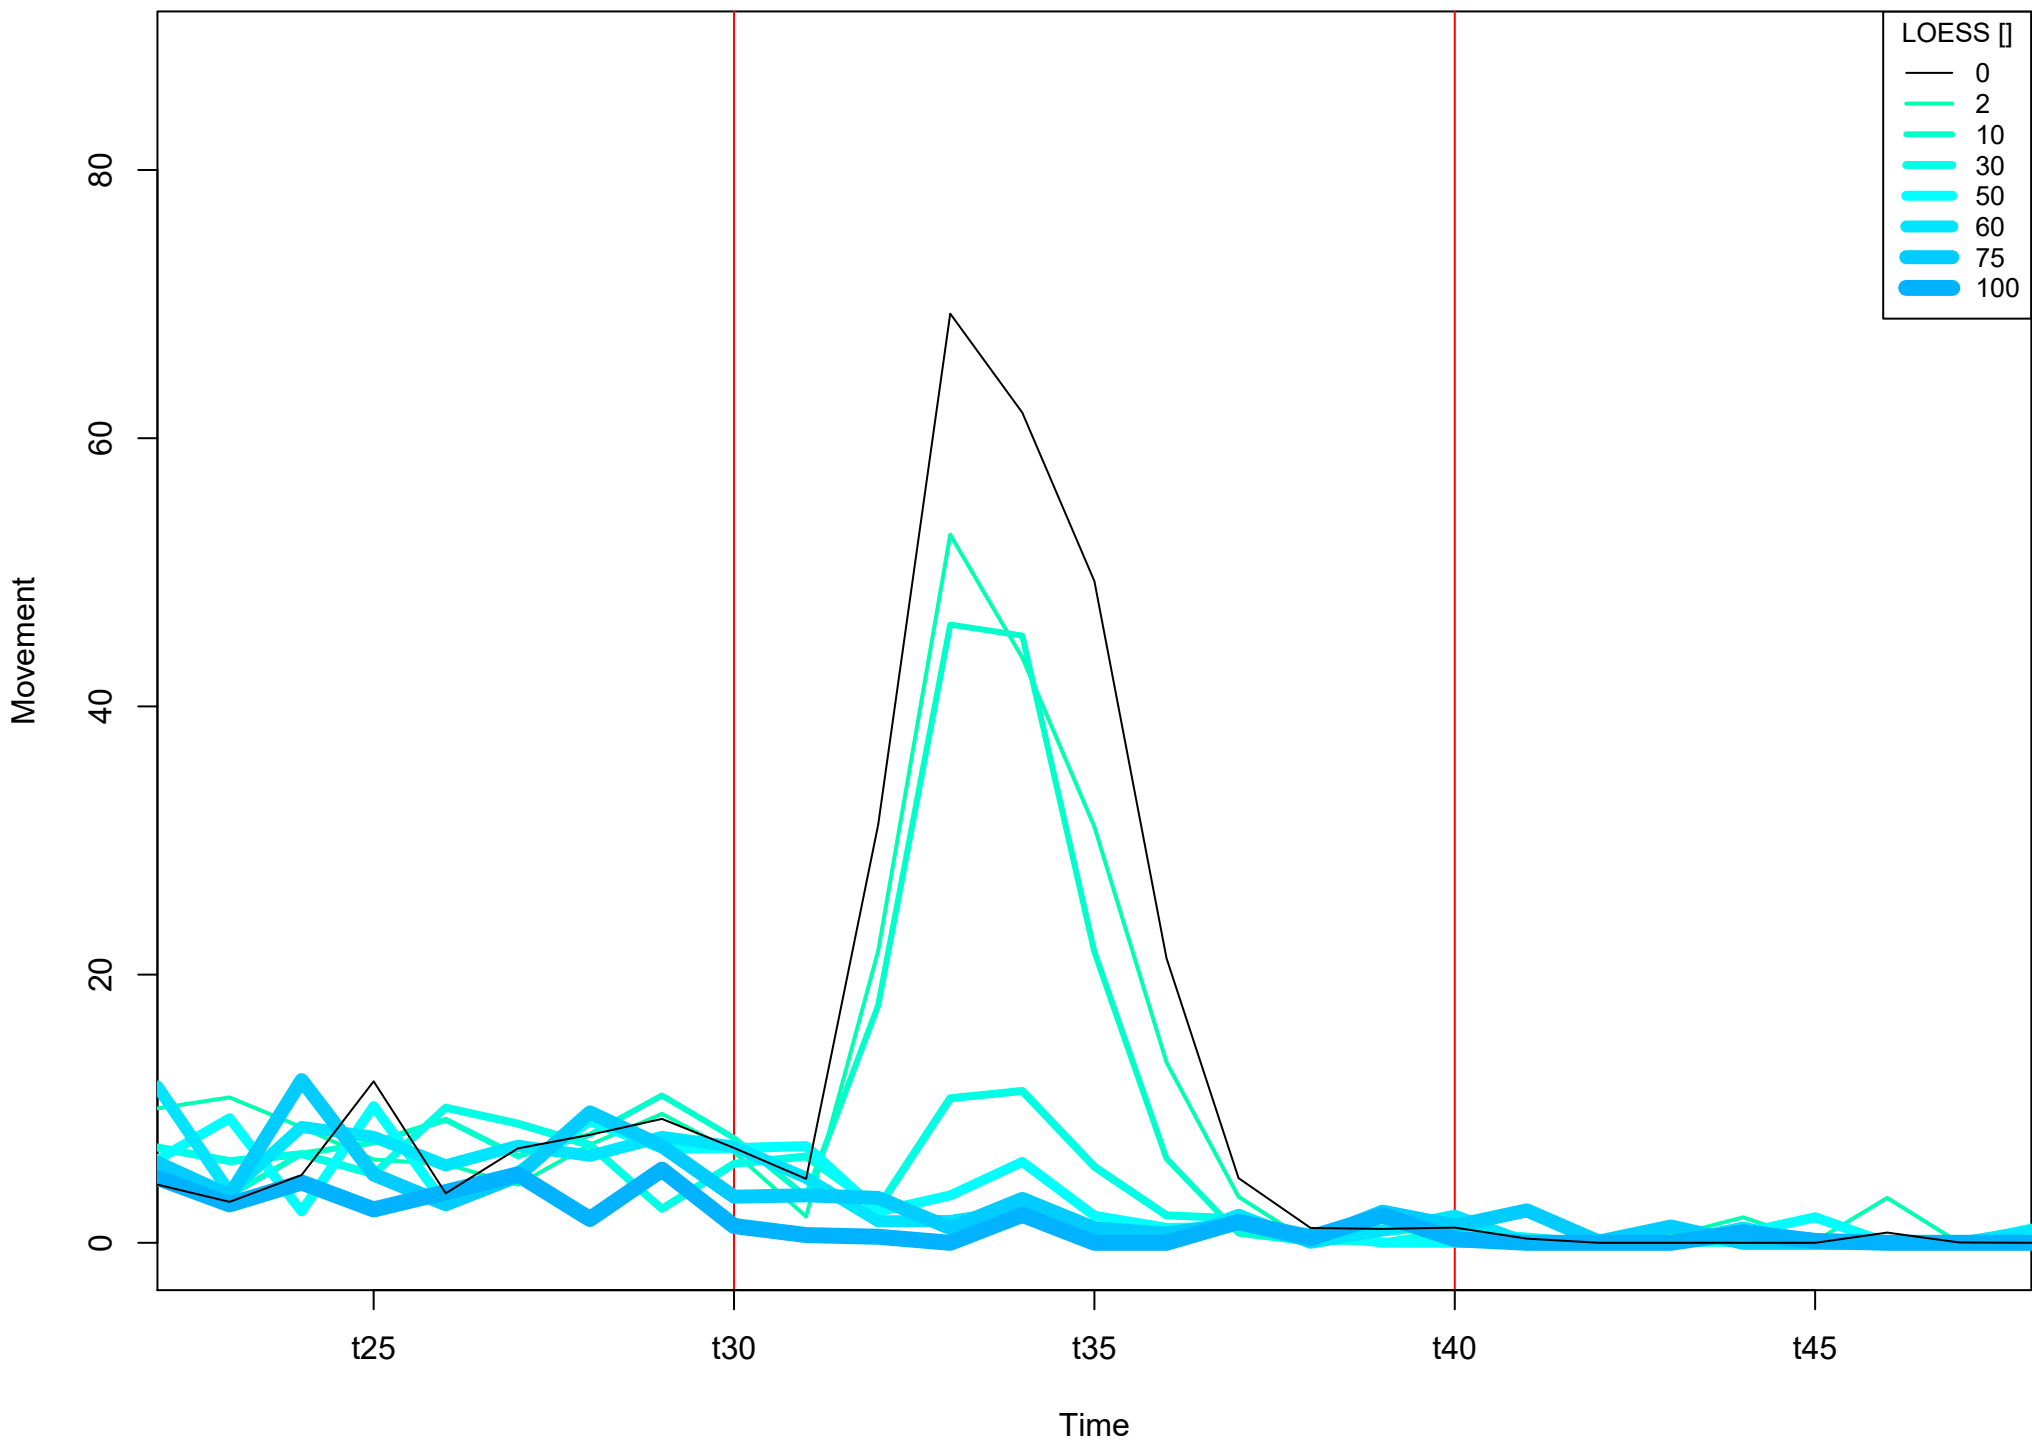



## BBF

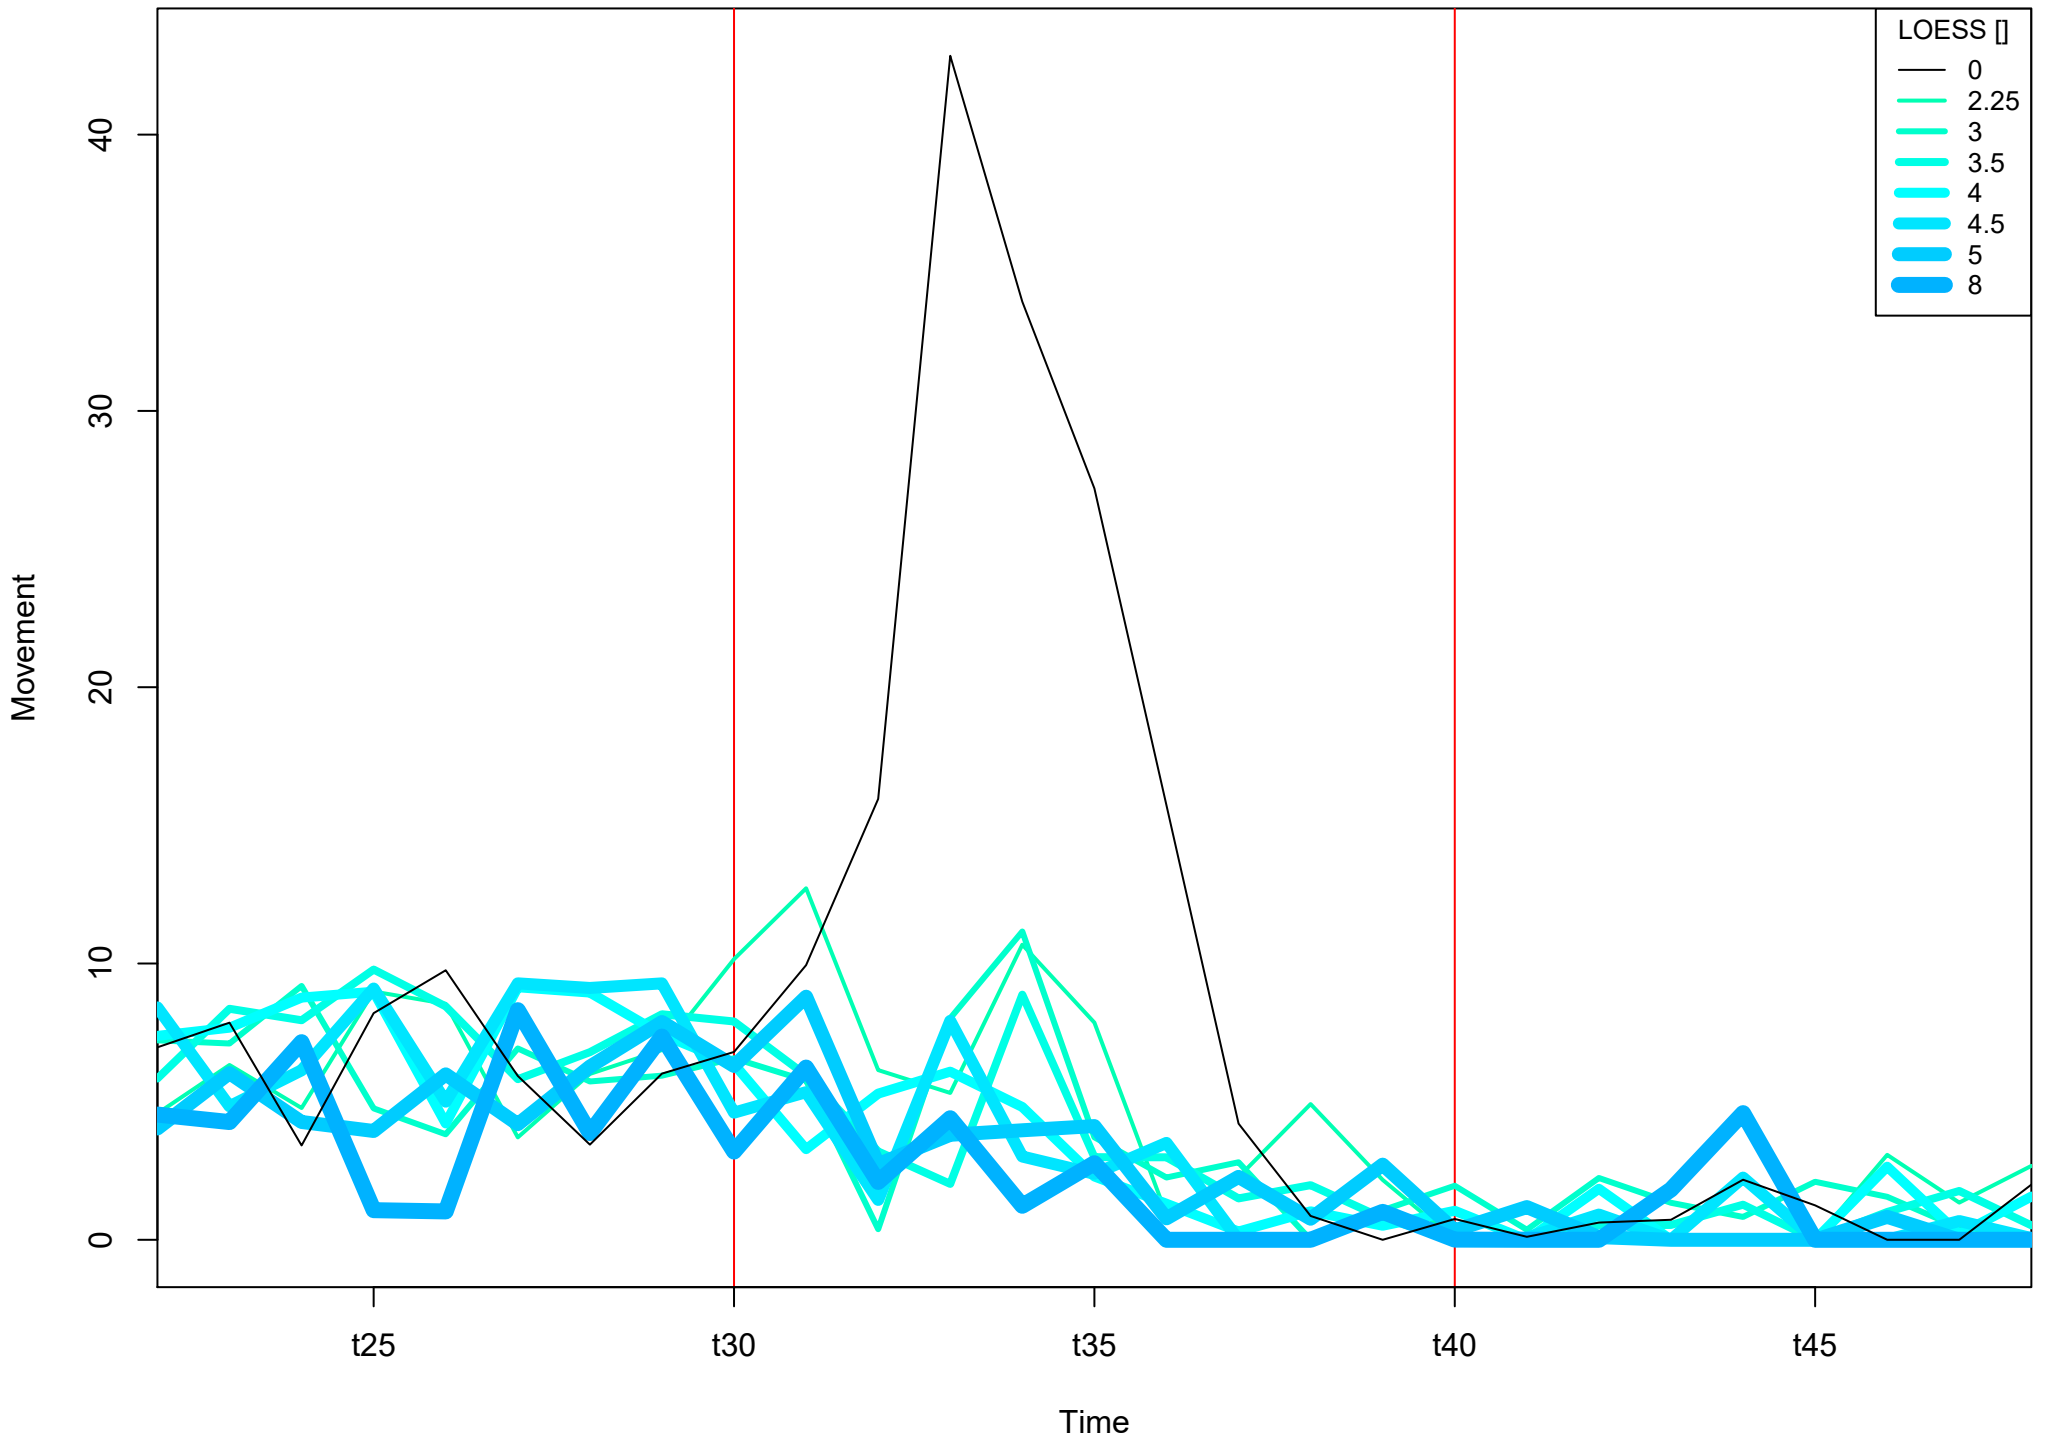



## BHT

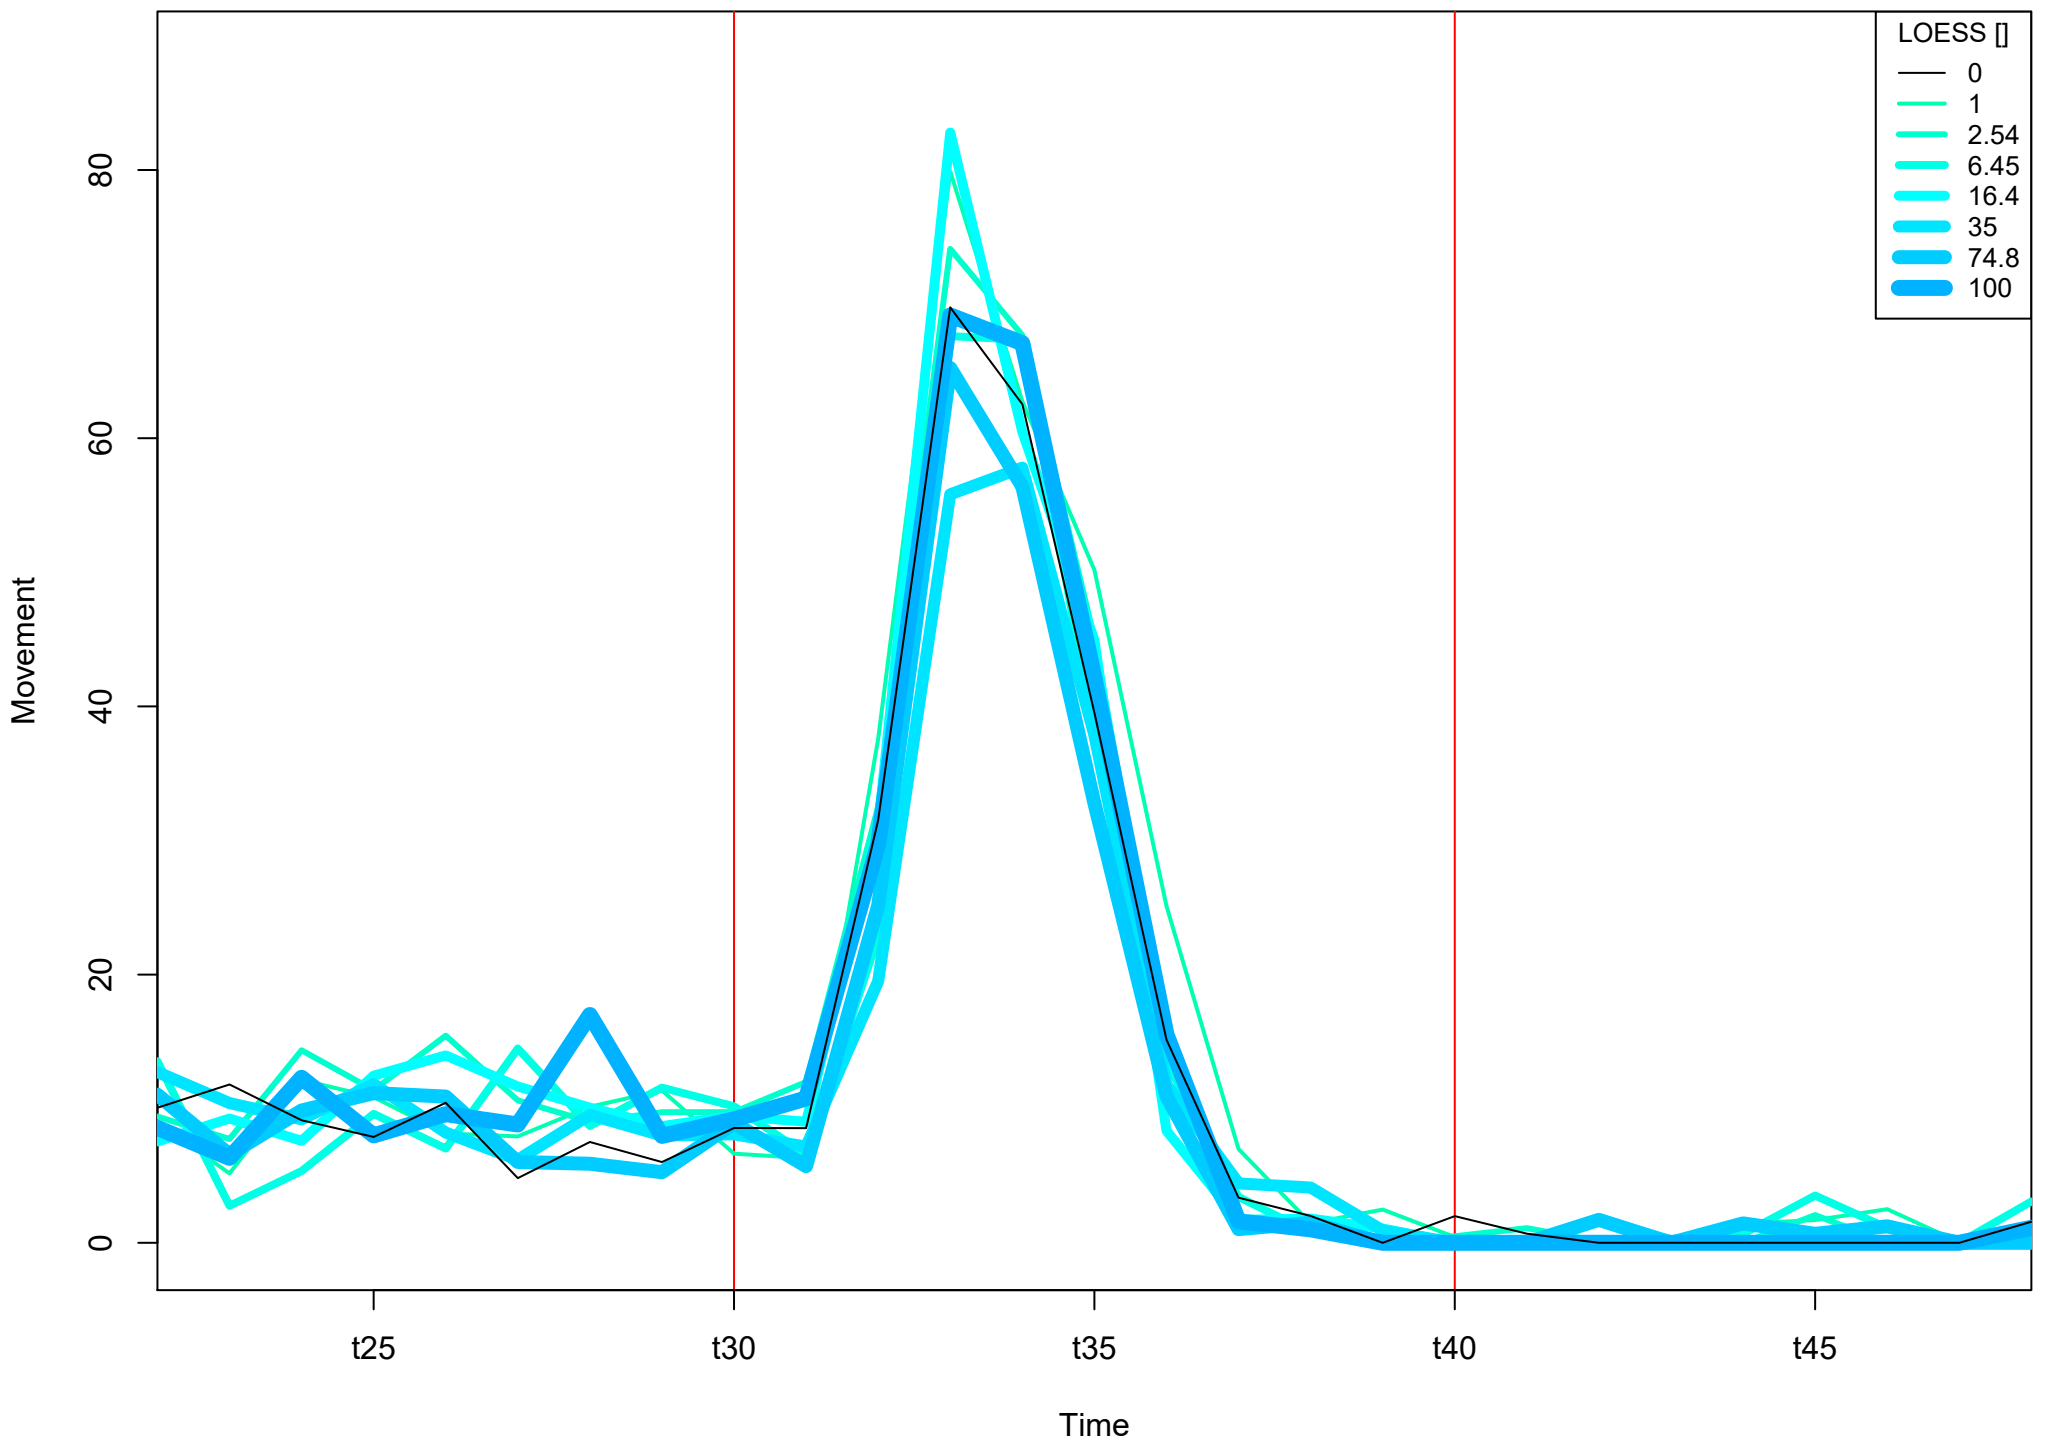



**BP**

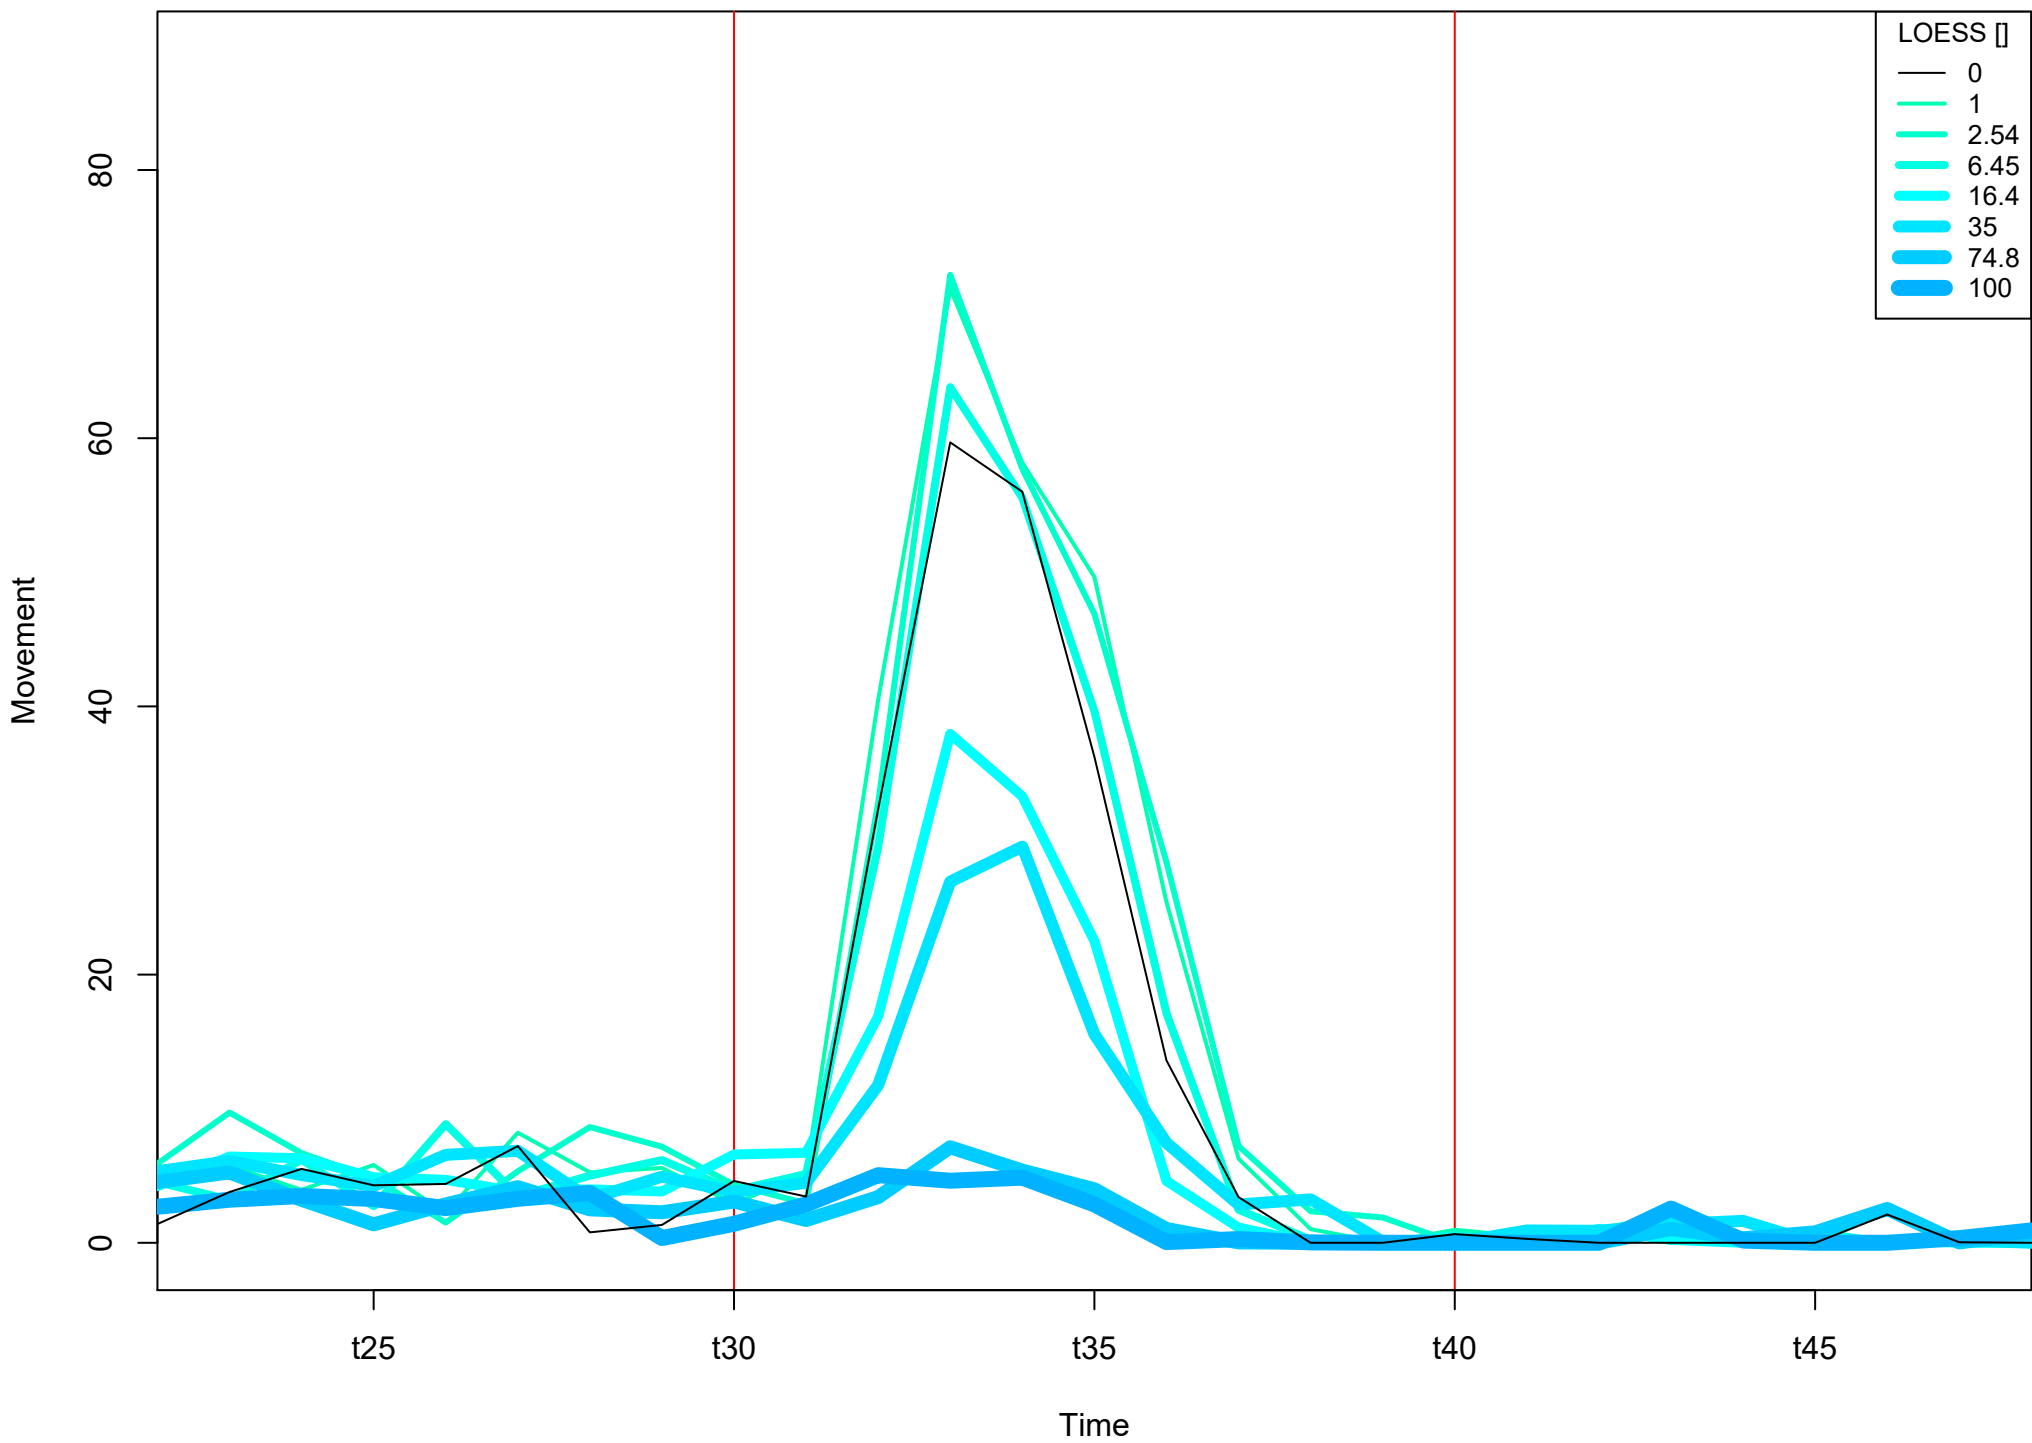



BS

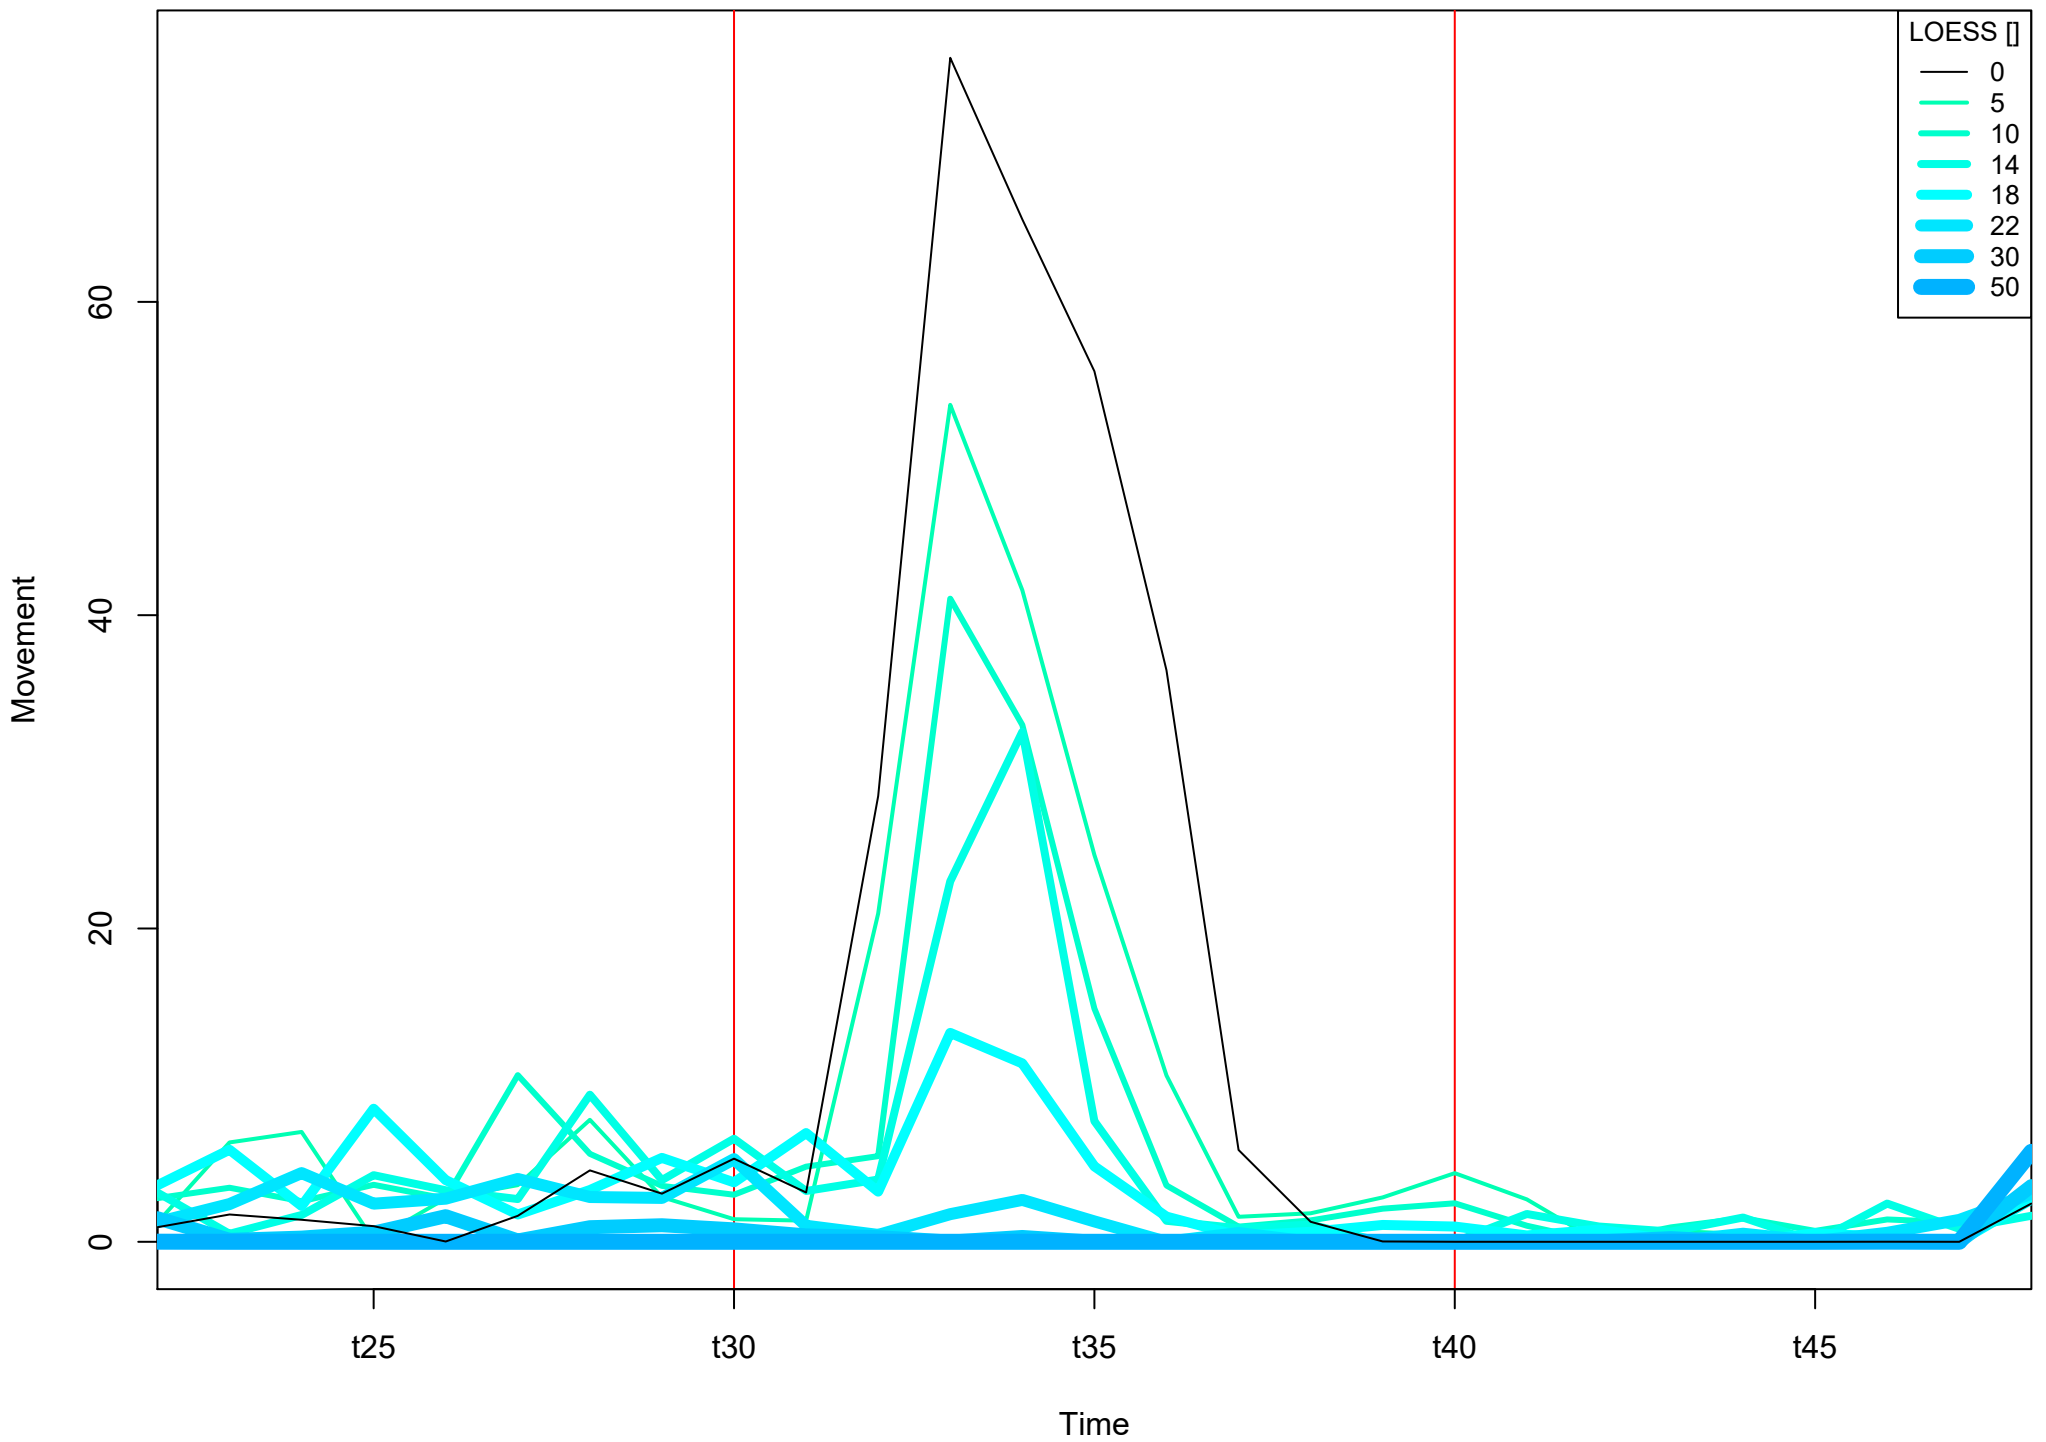



## DBP

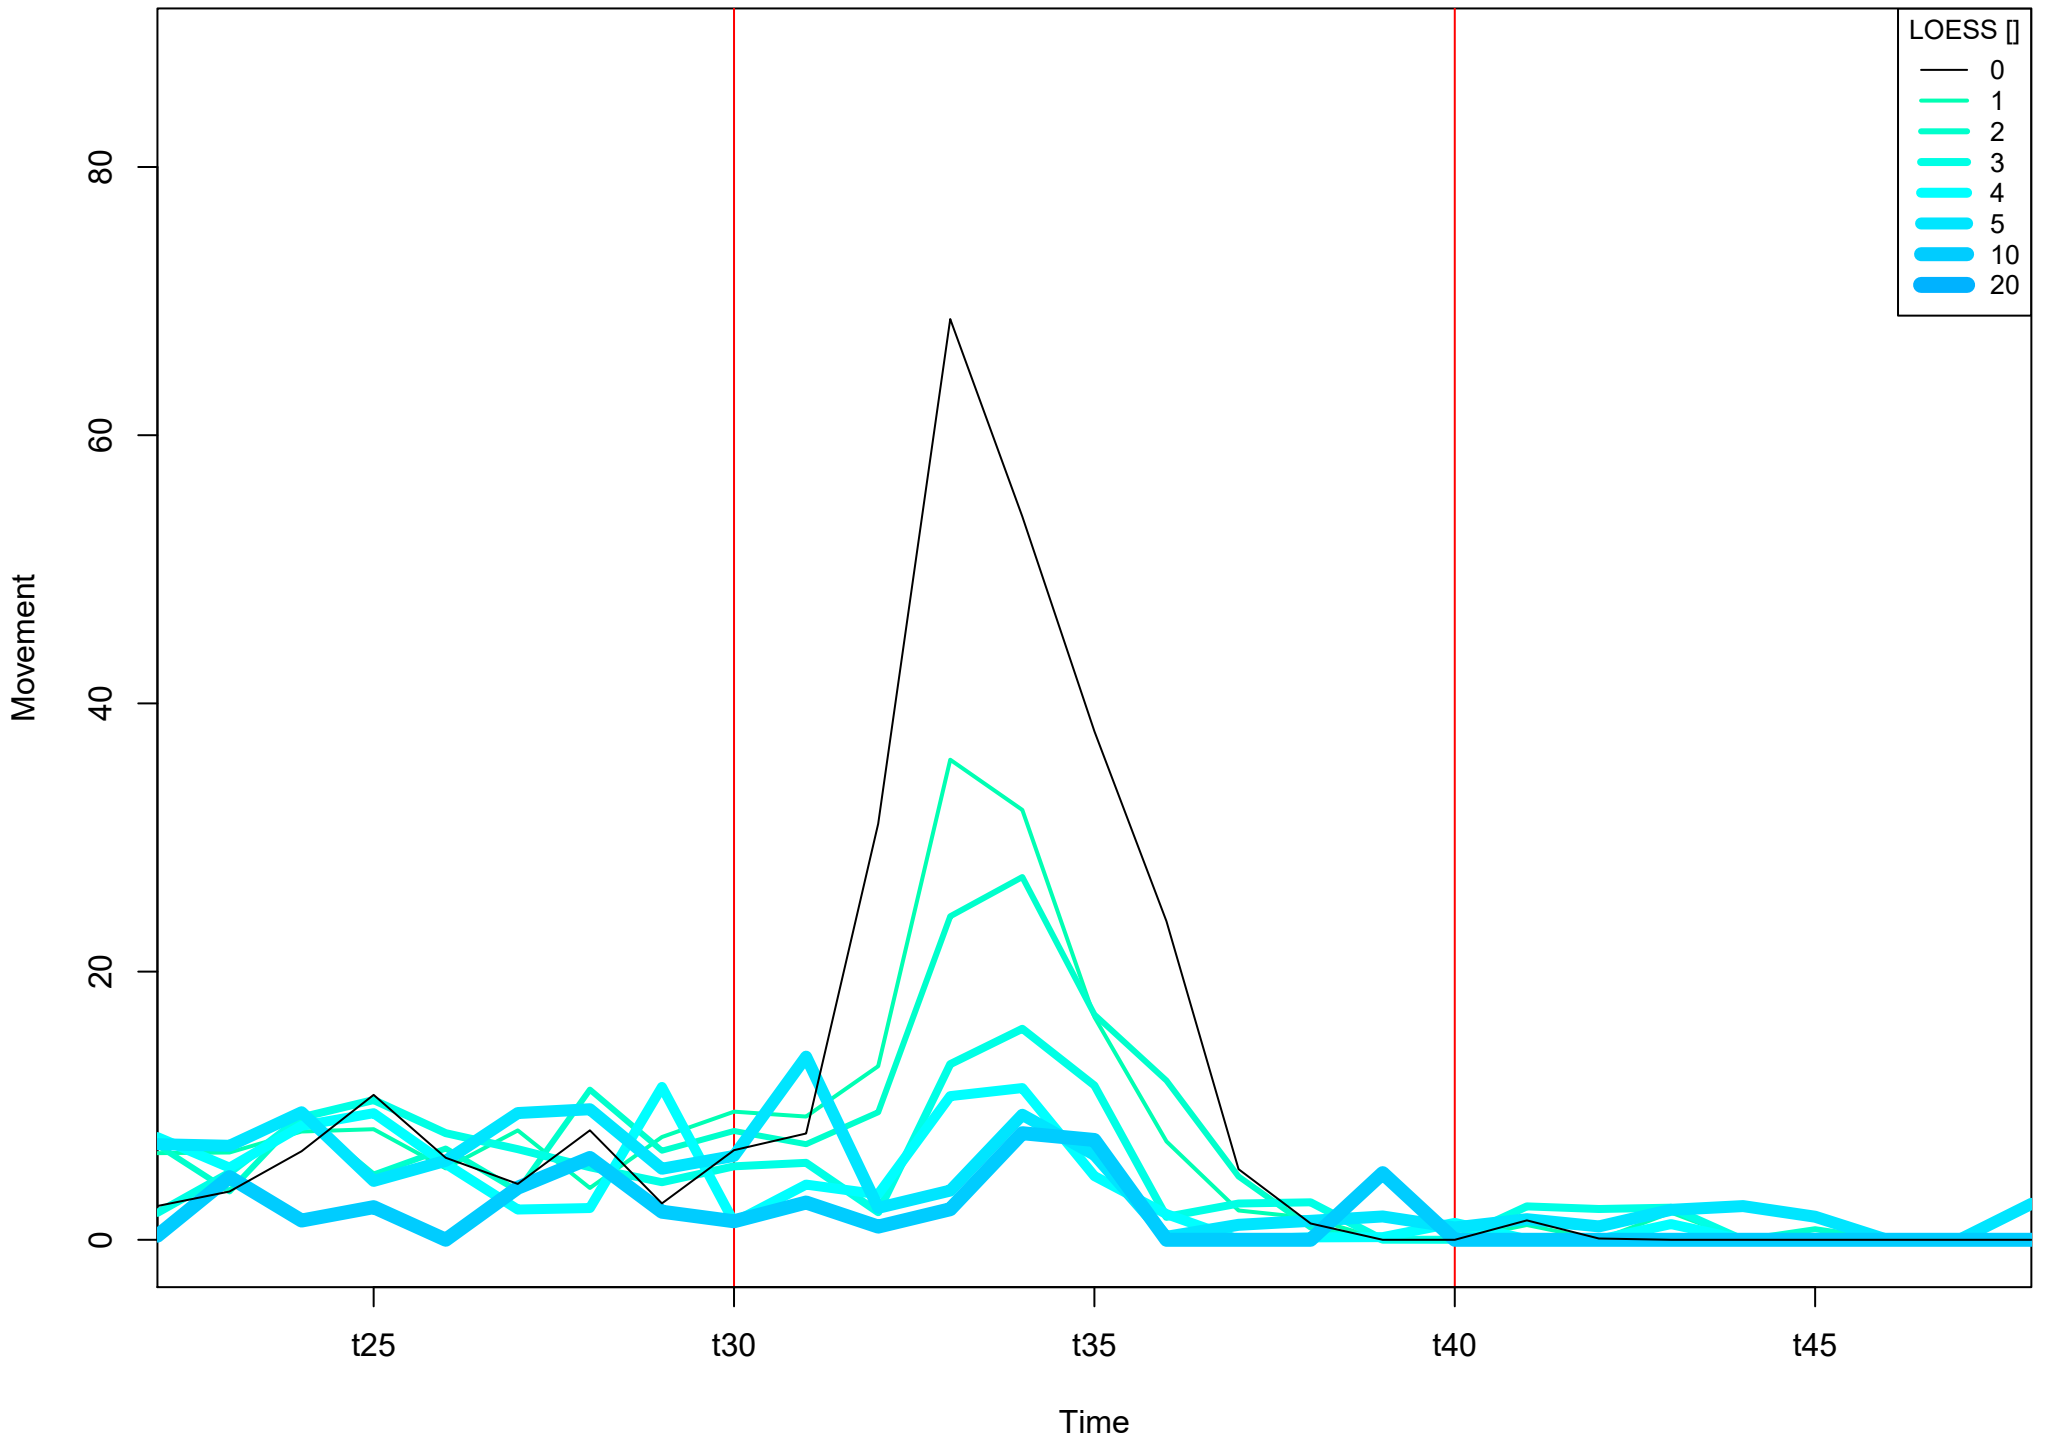



# DEET

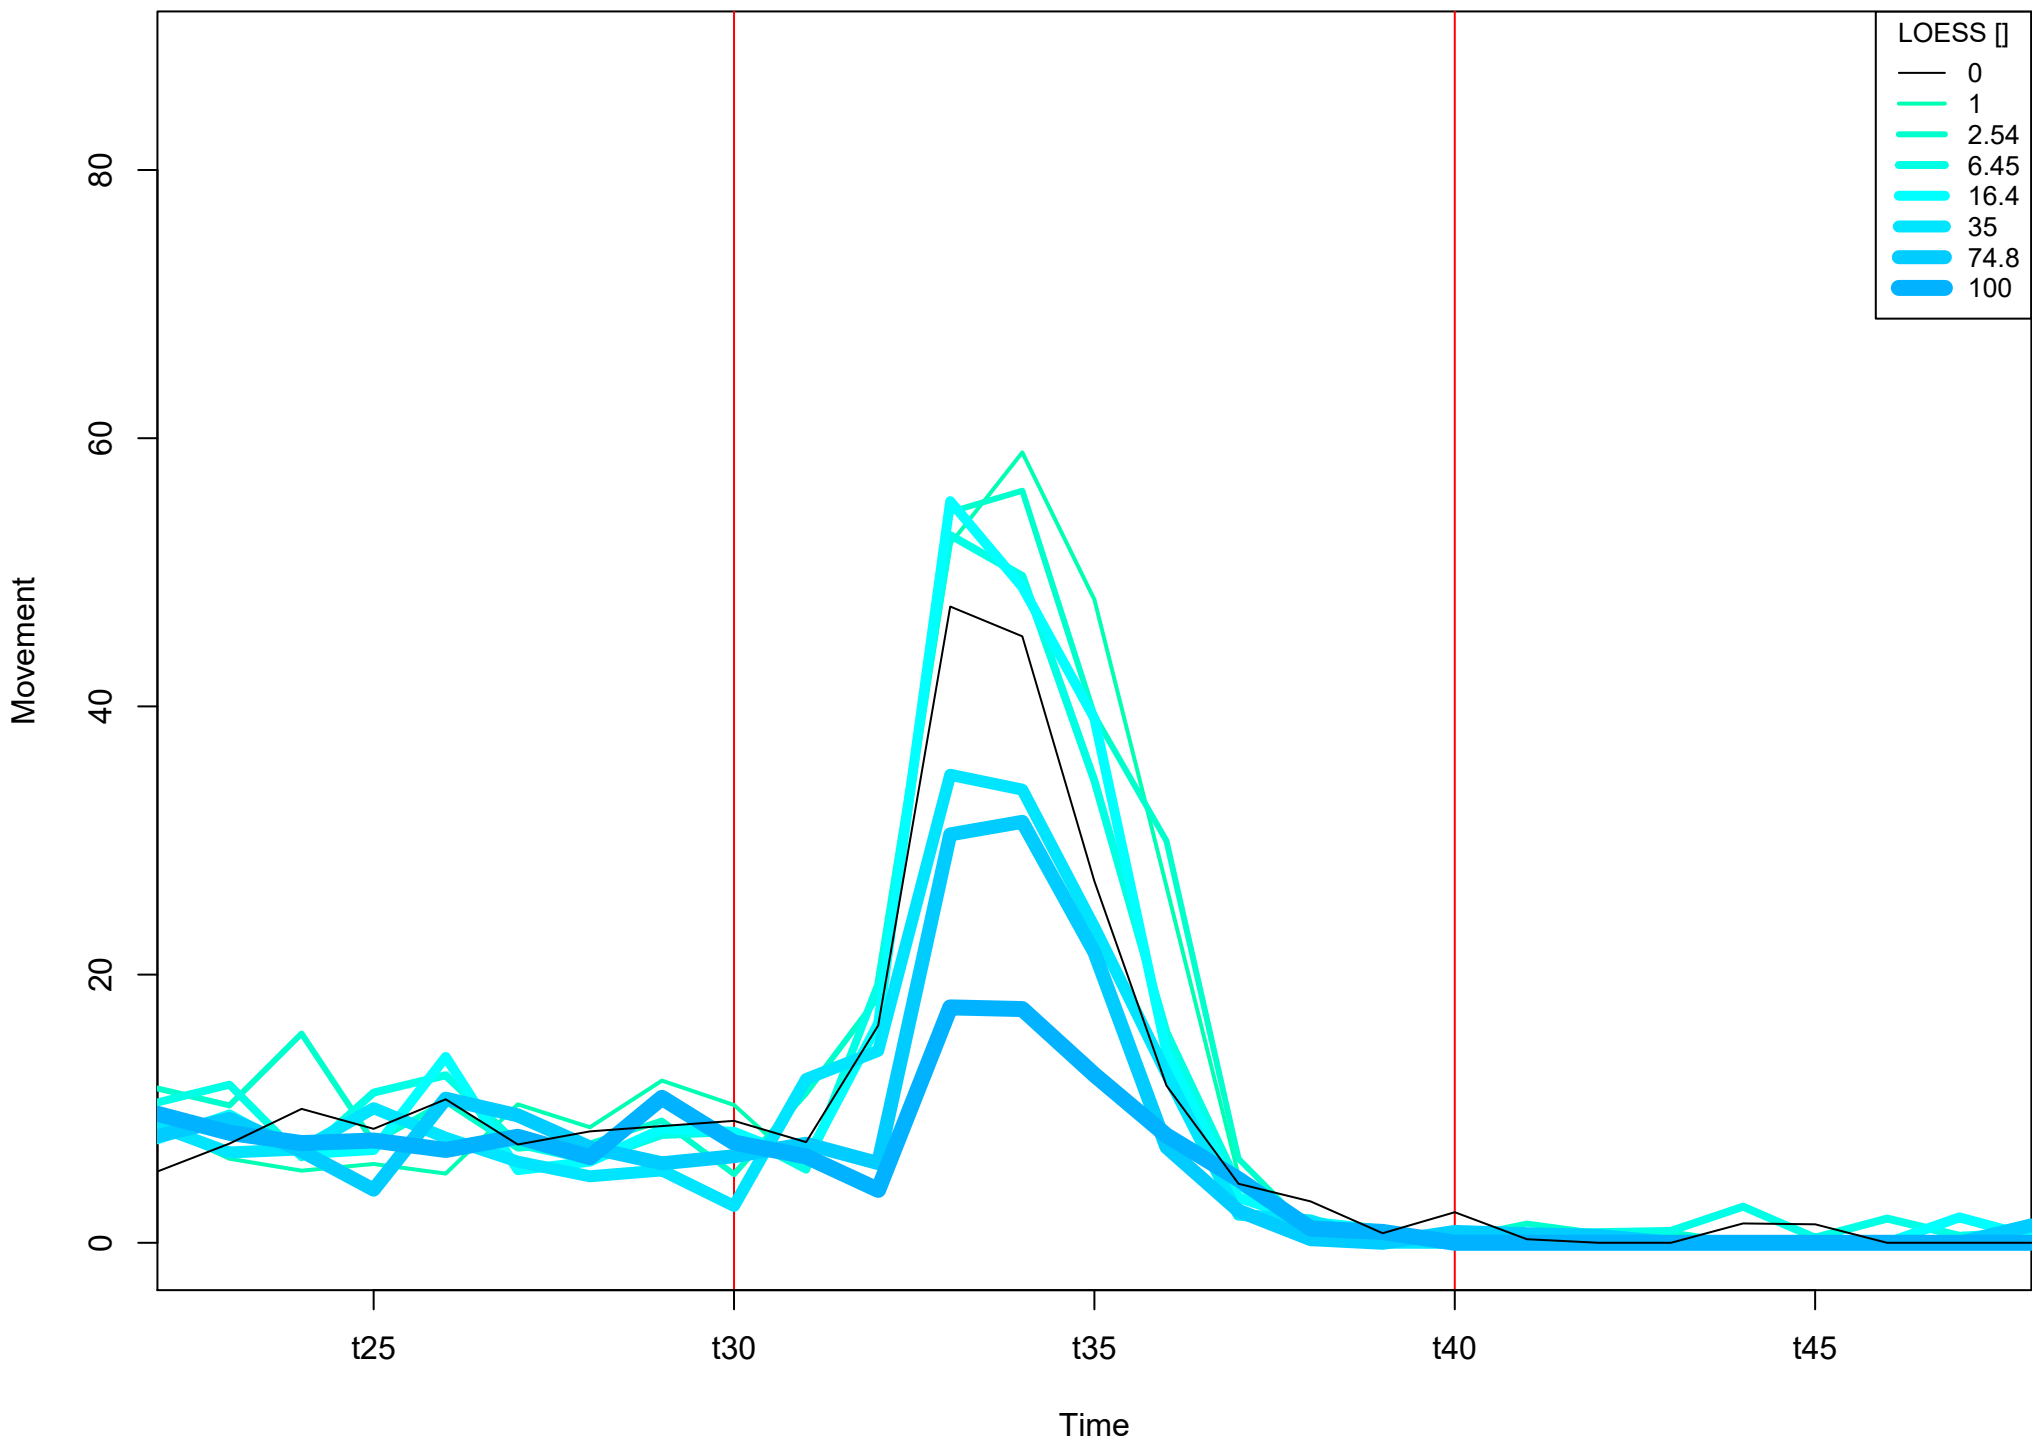



# DEHP

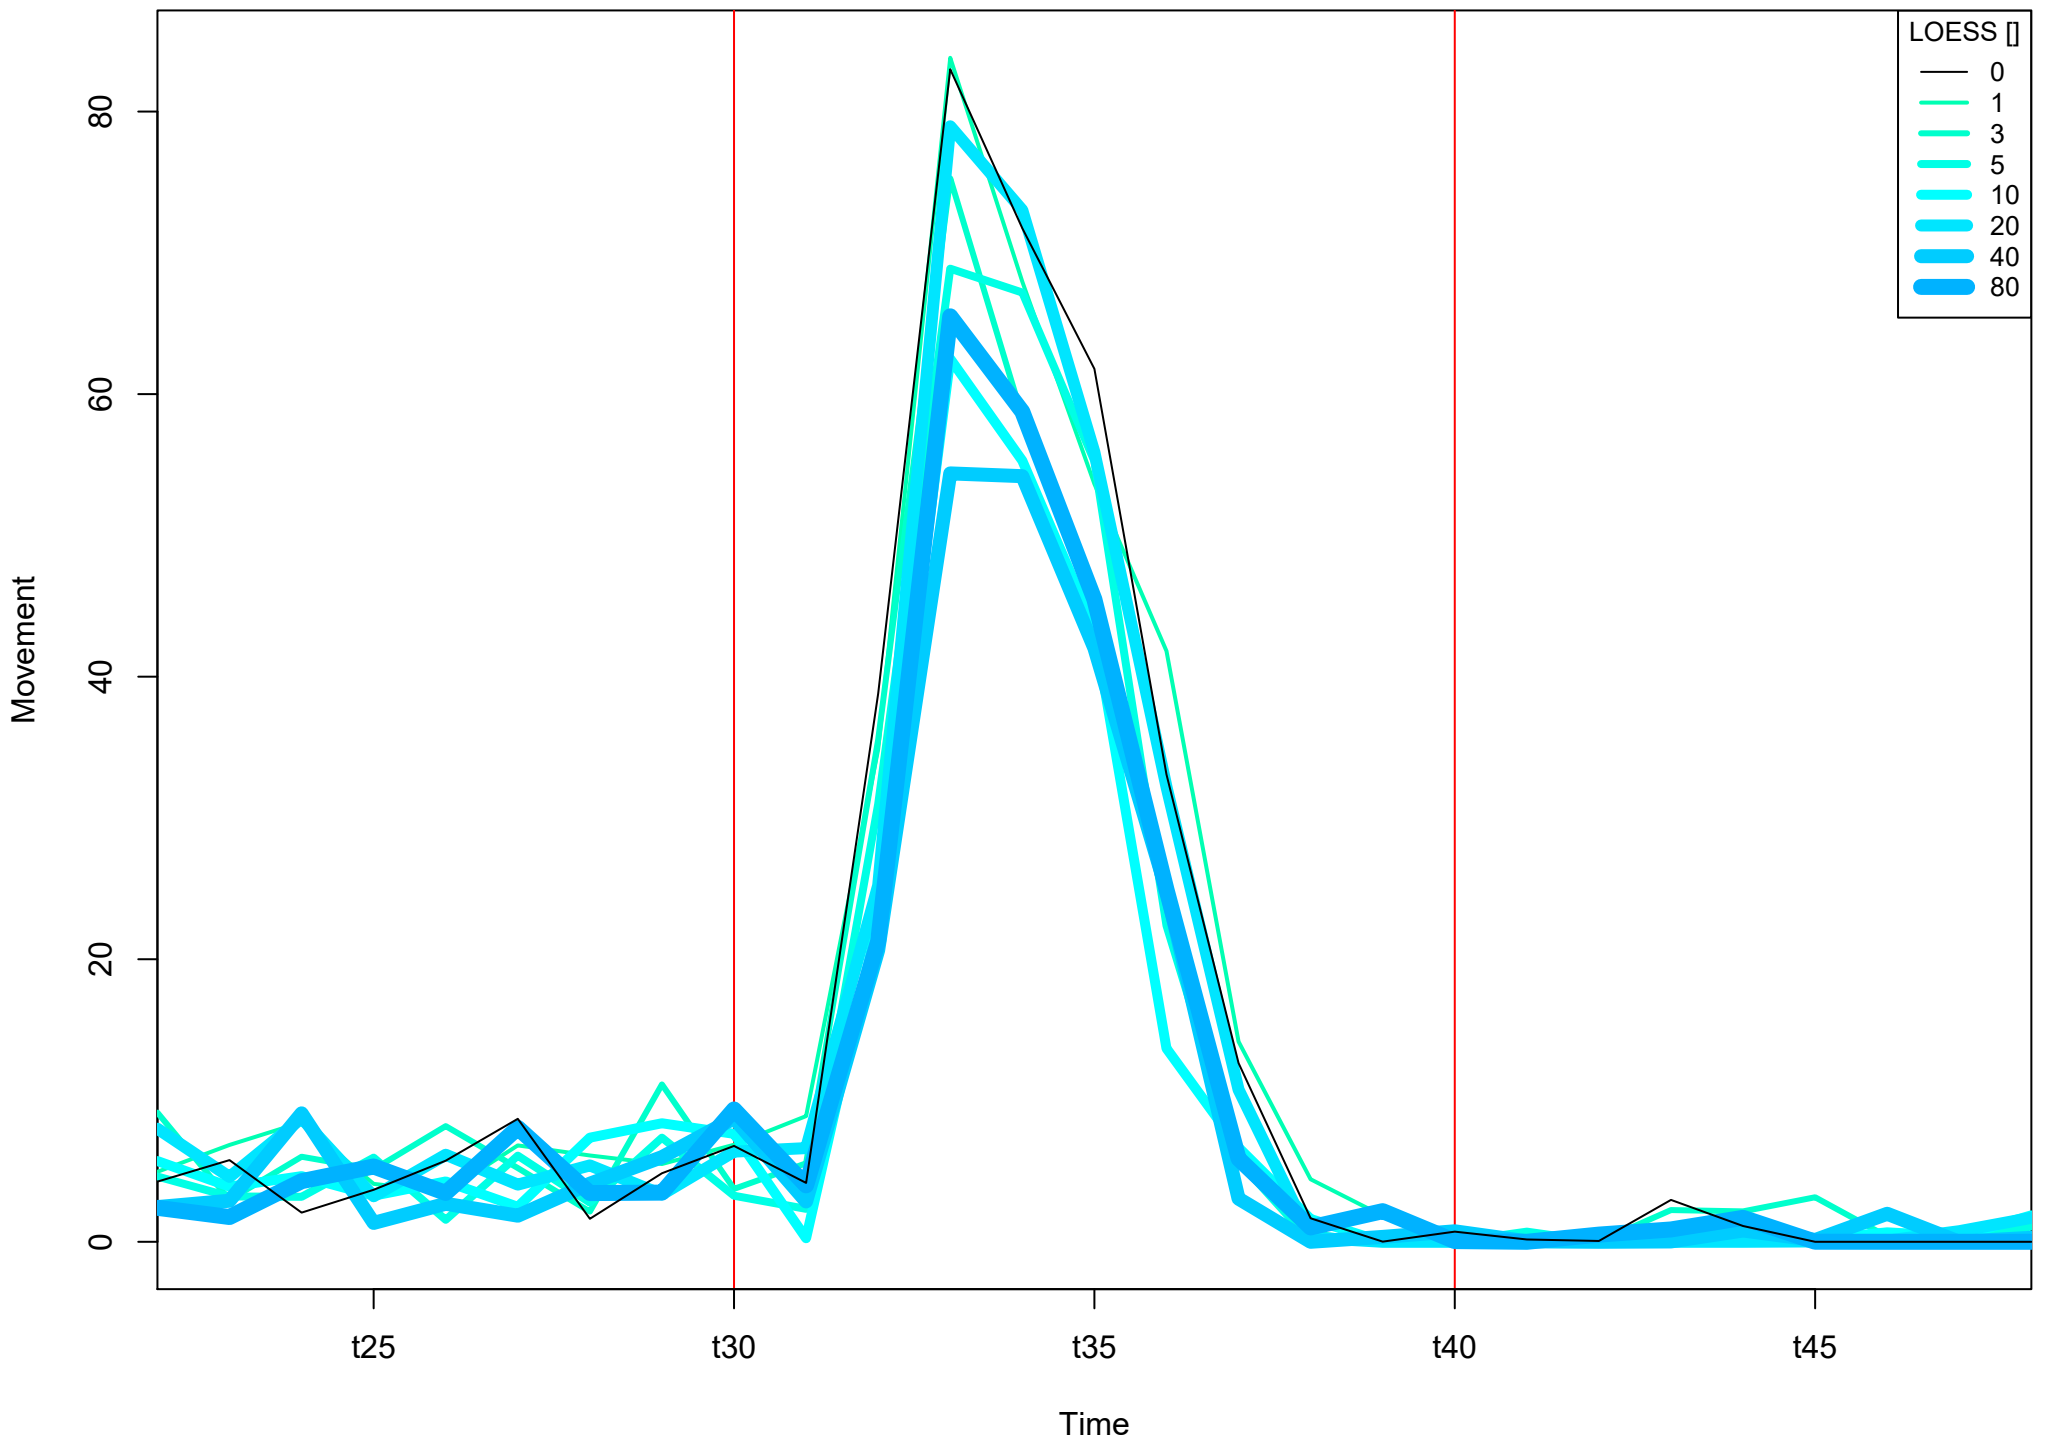



# DEP

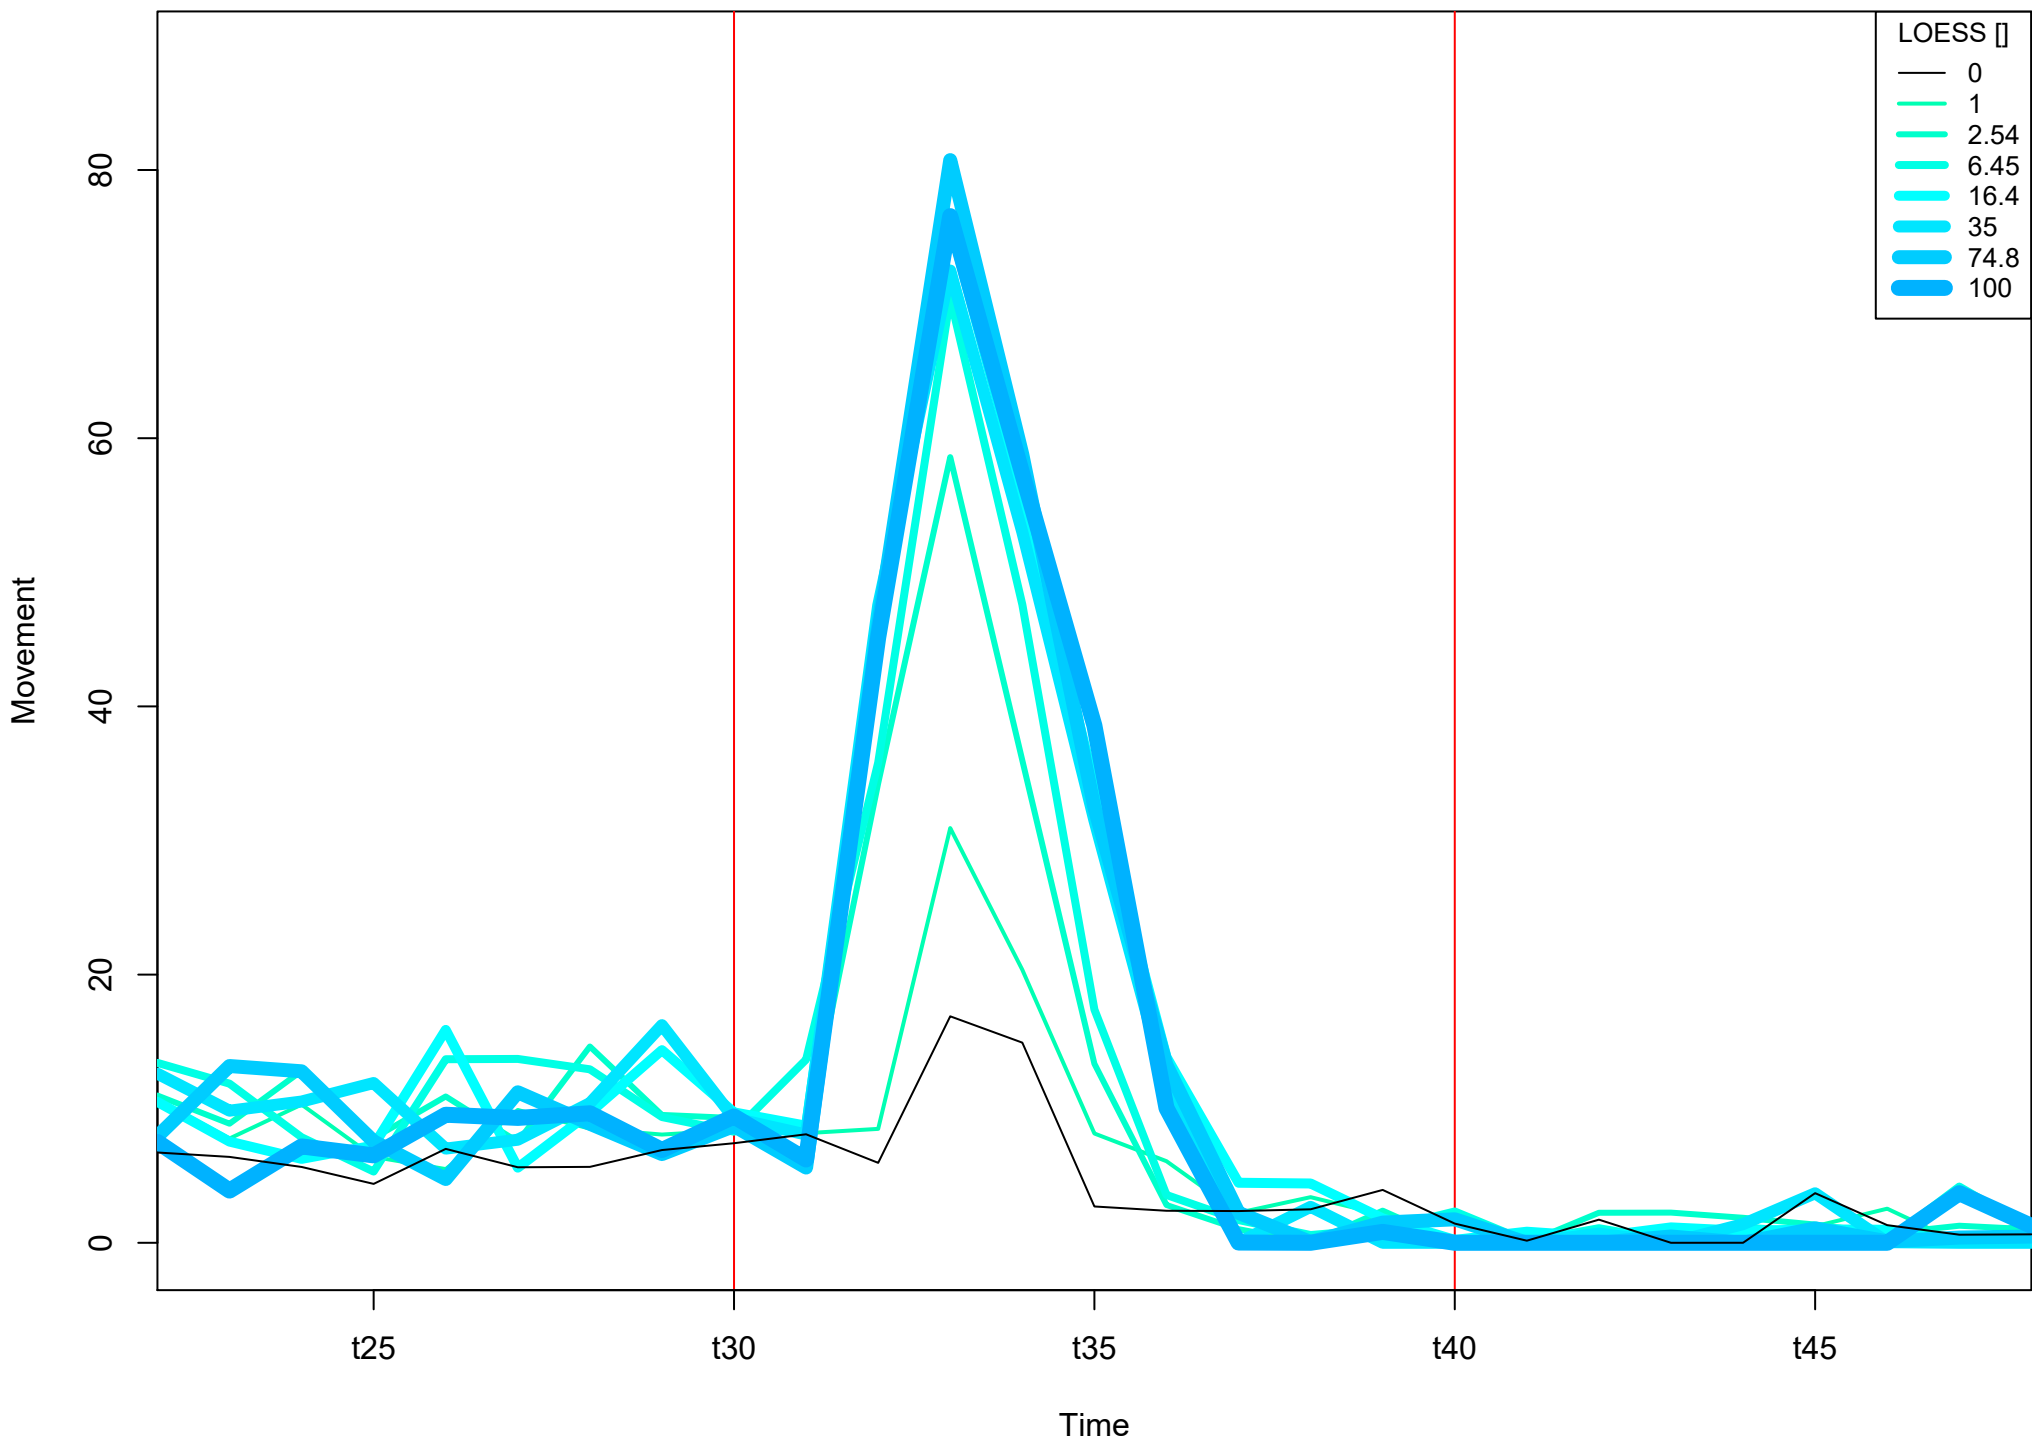



# DIBP

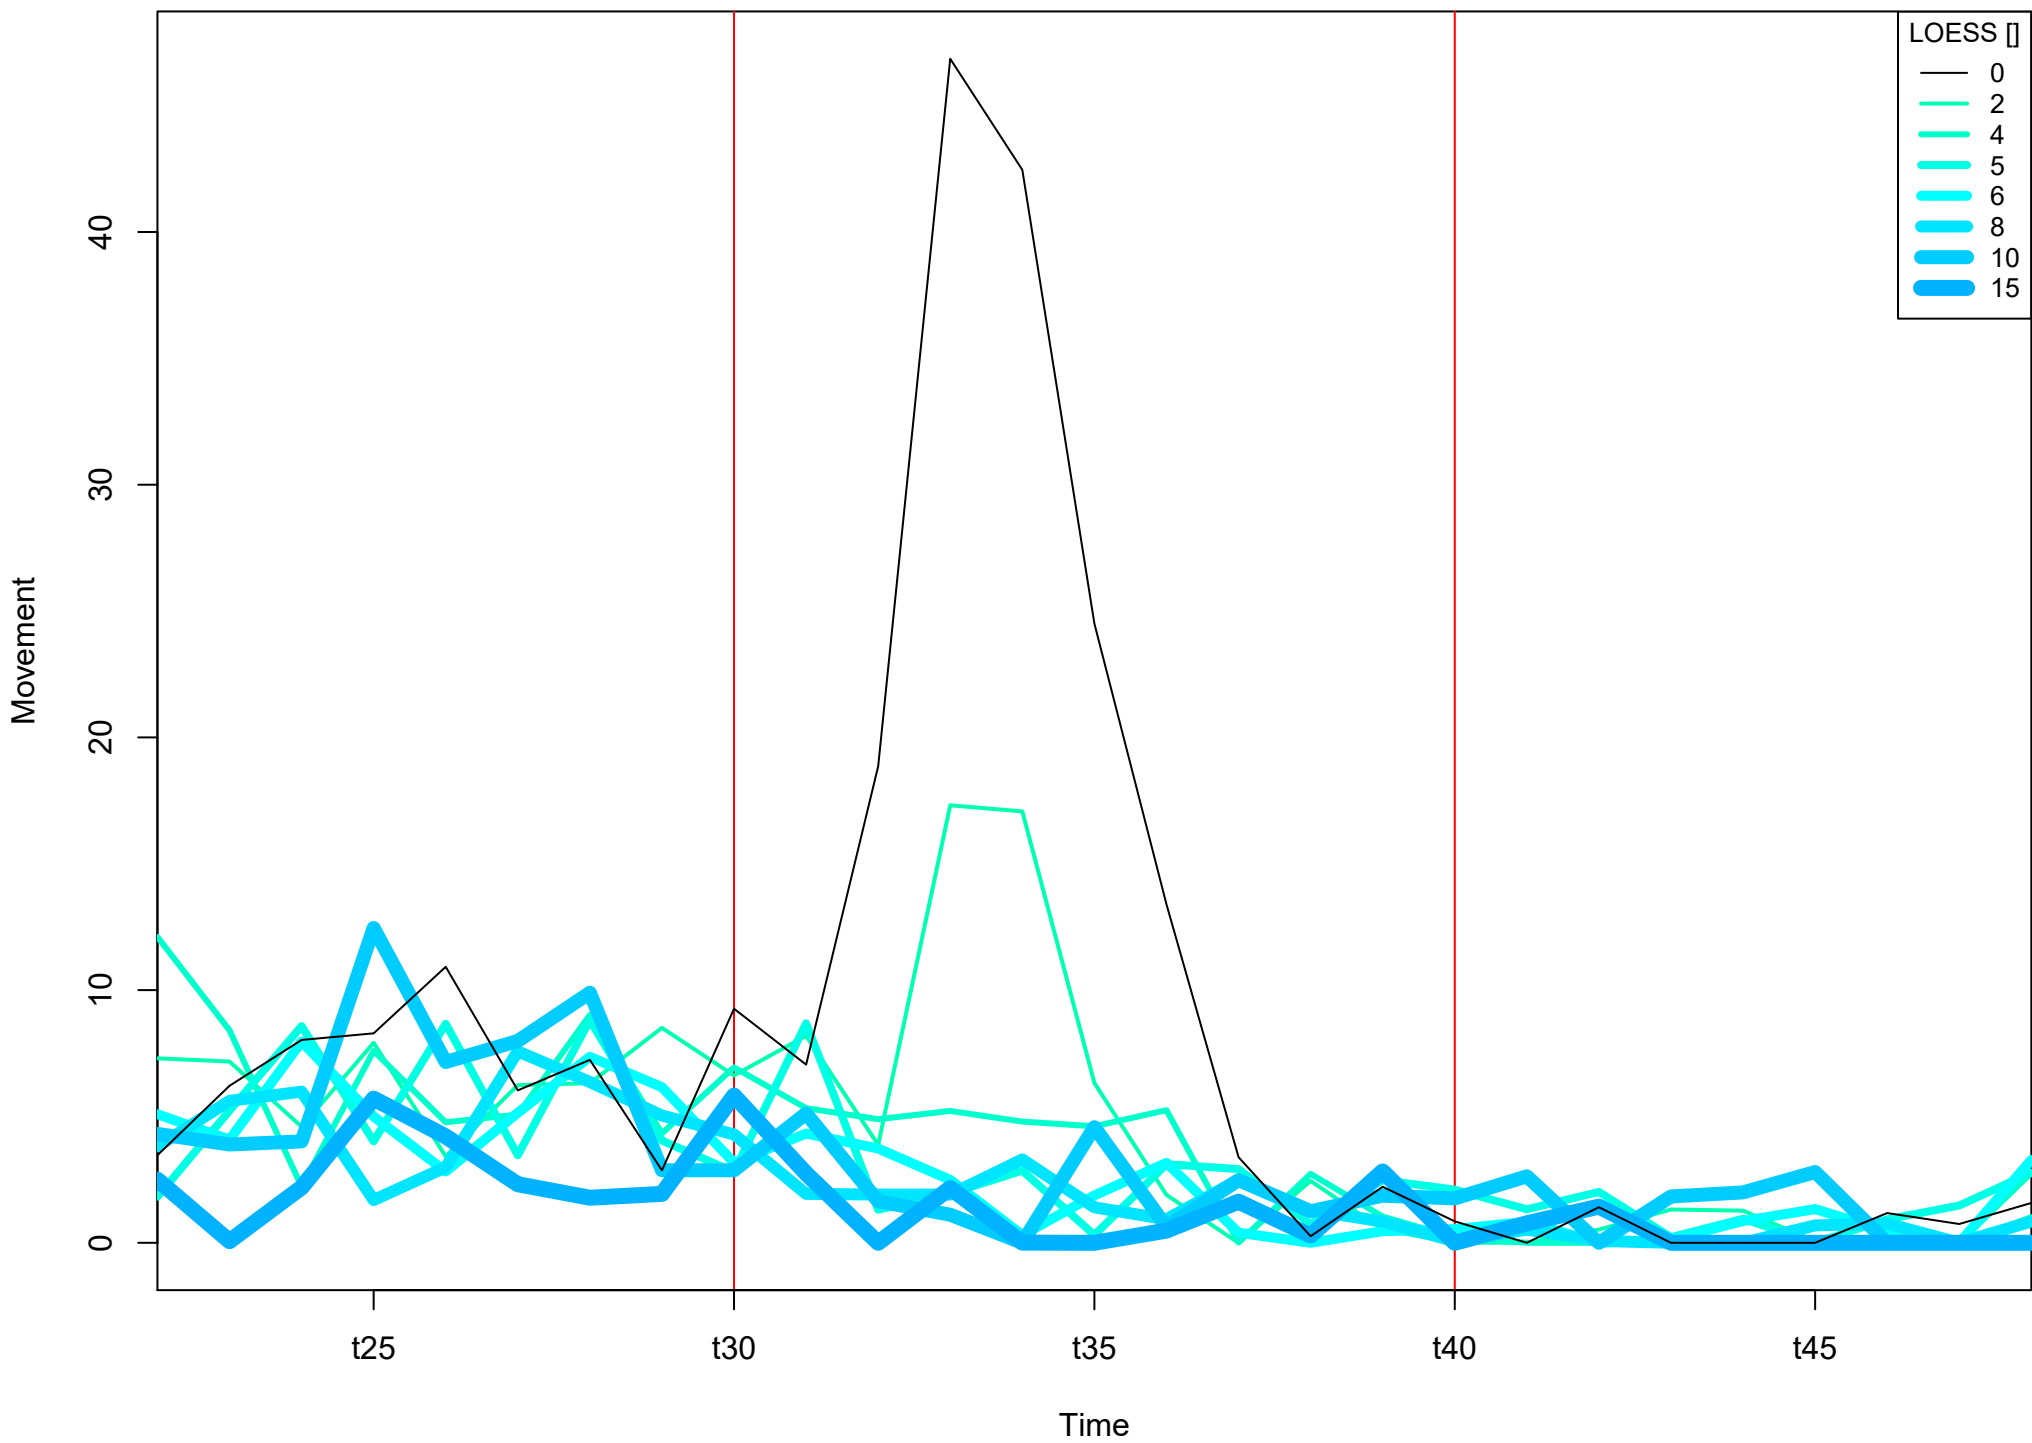



# DNP

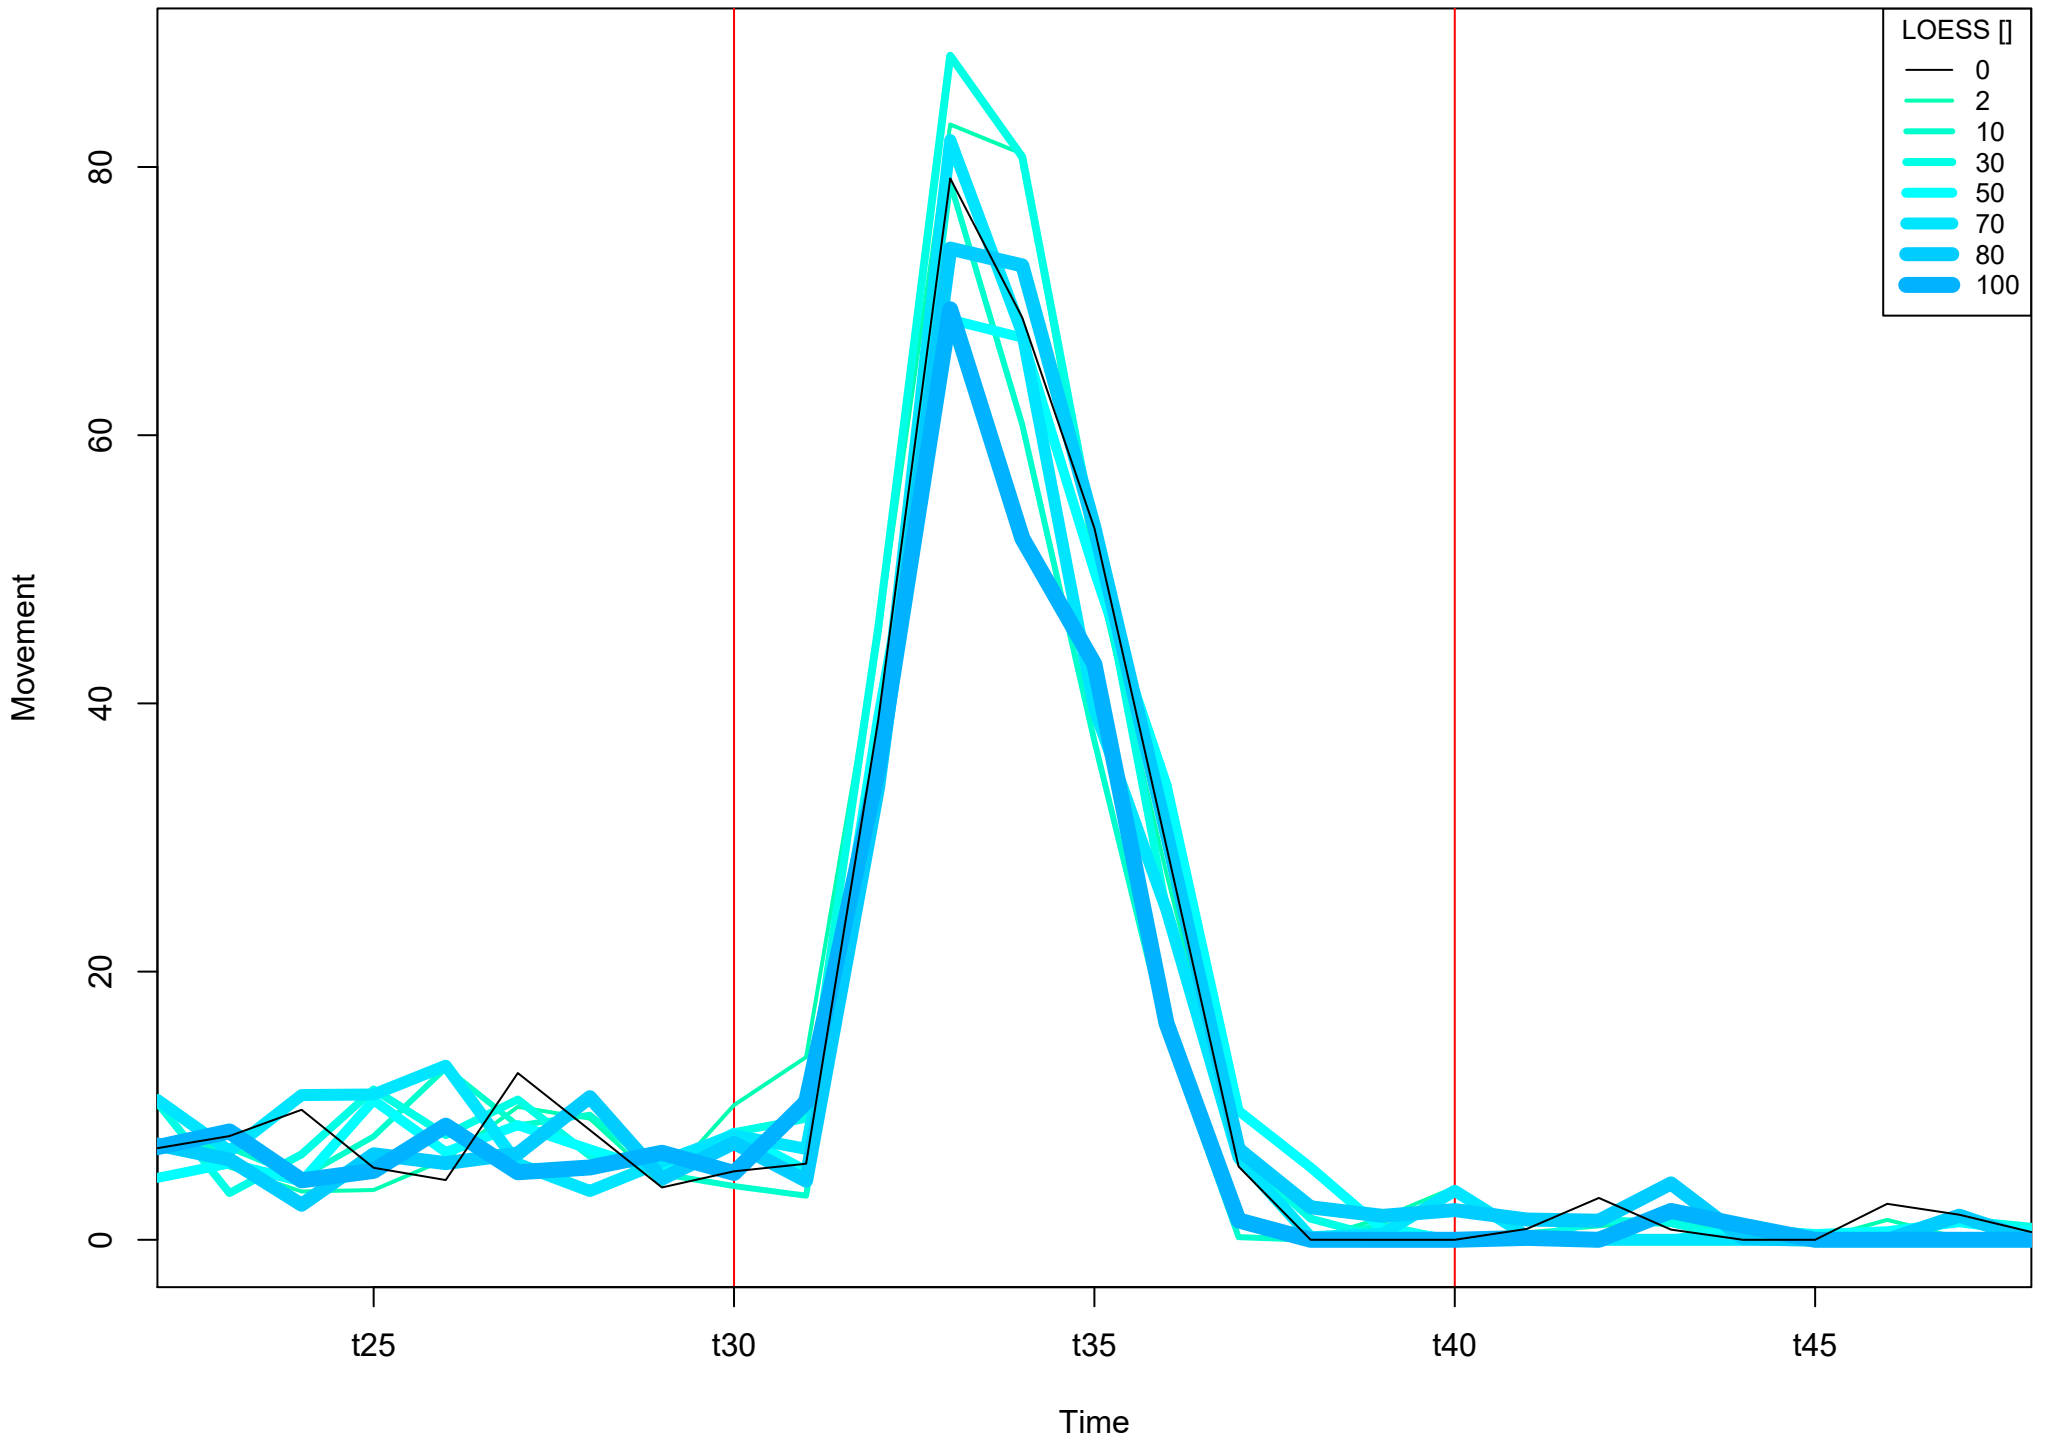



## HHCB

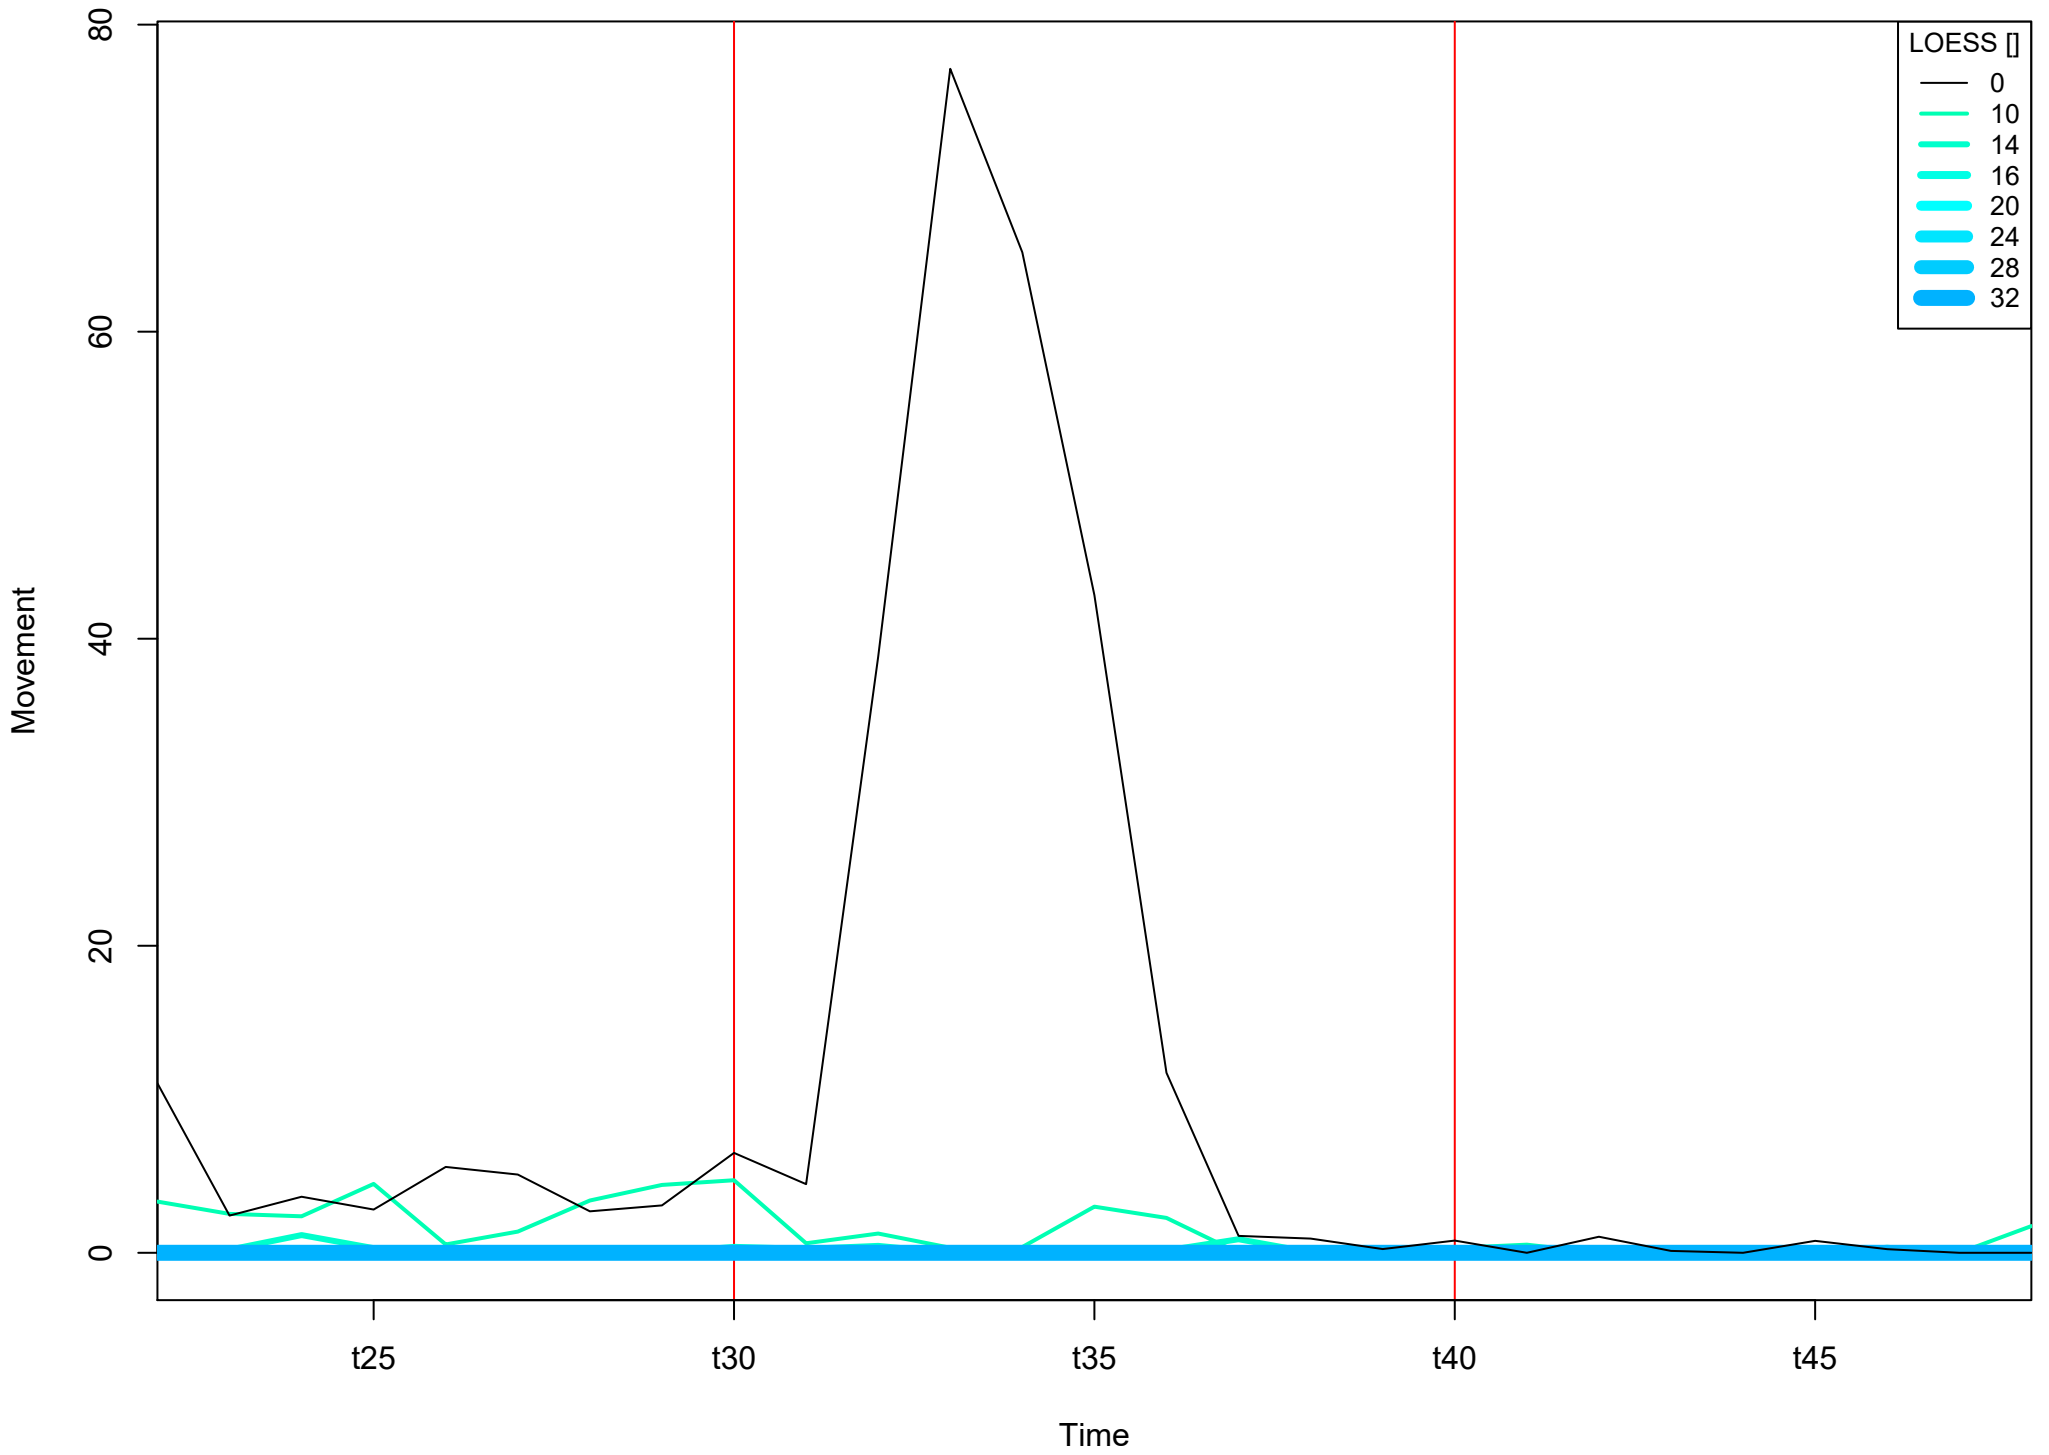



## Lilial

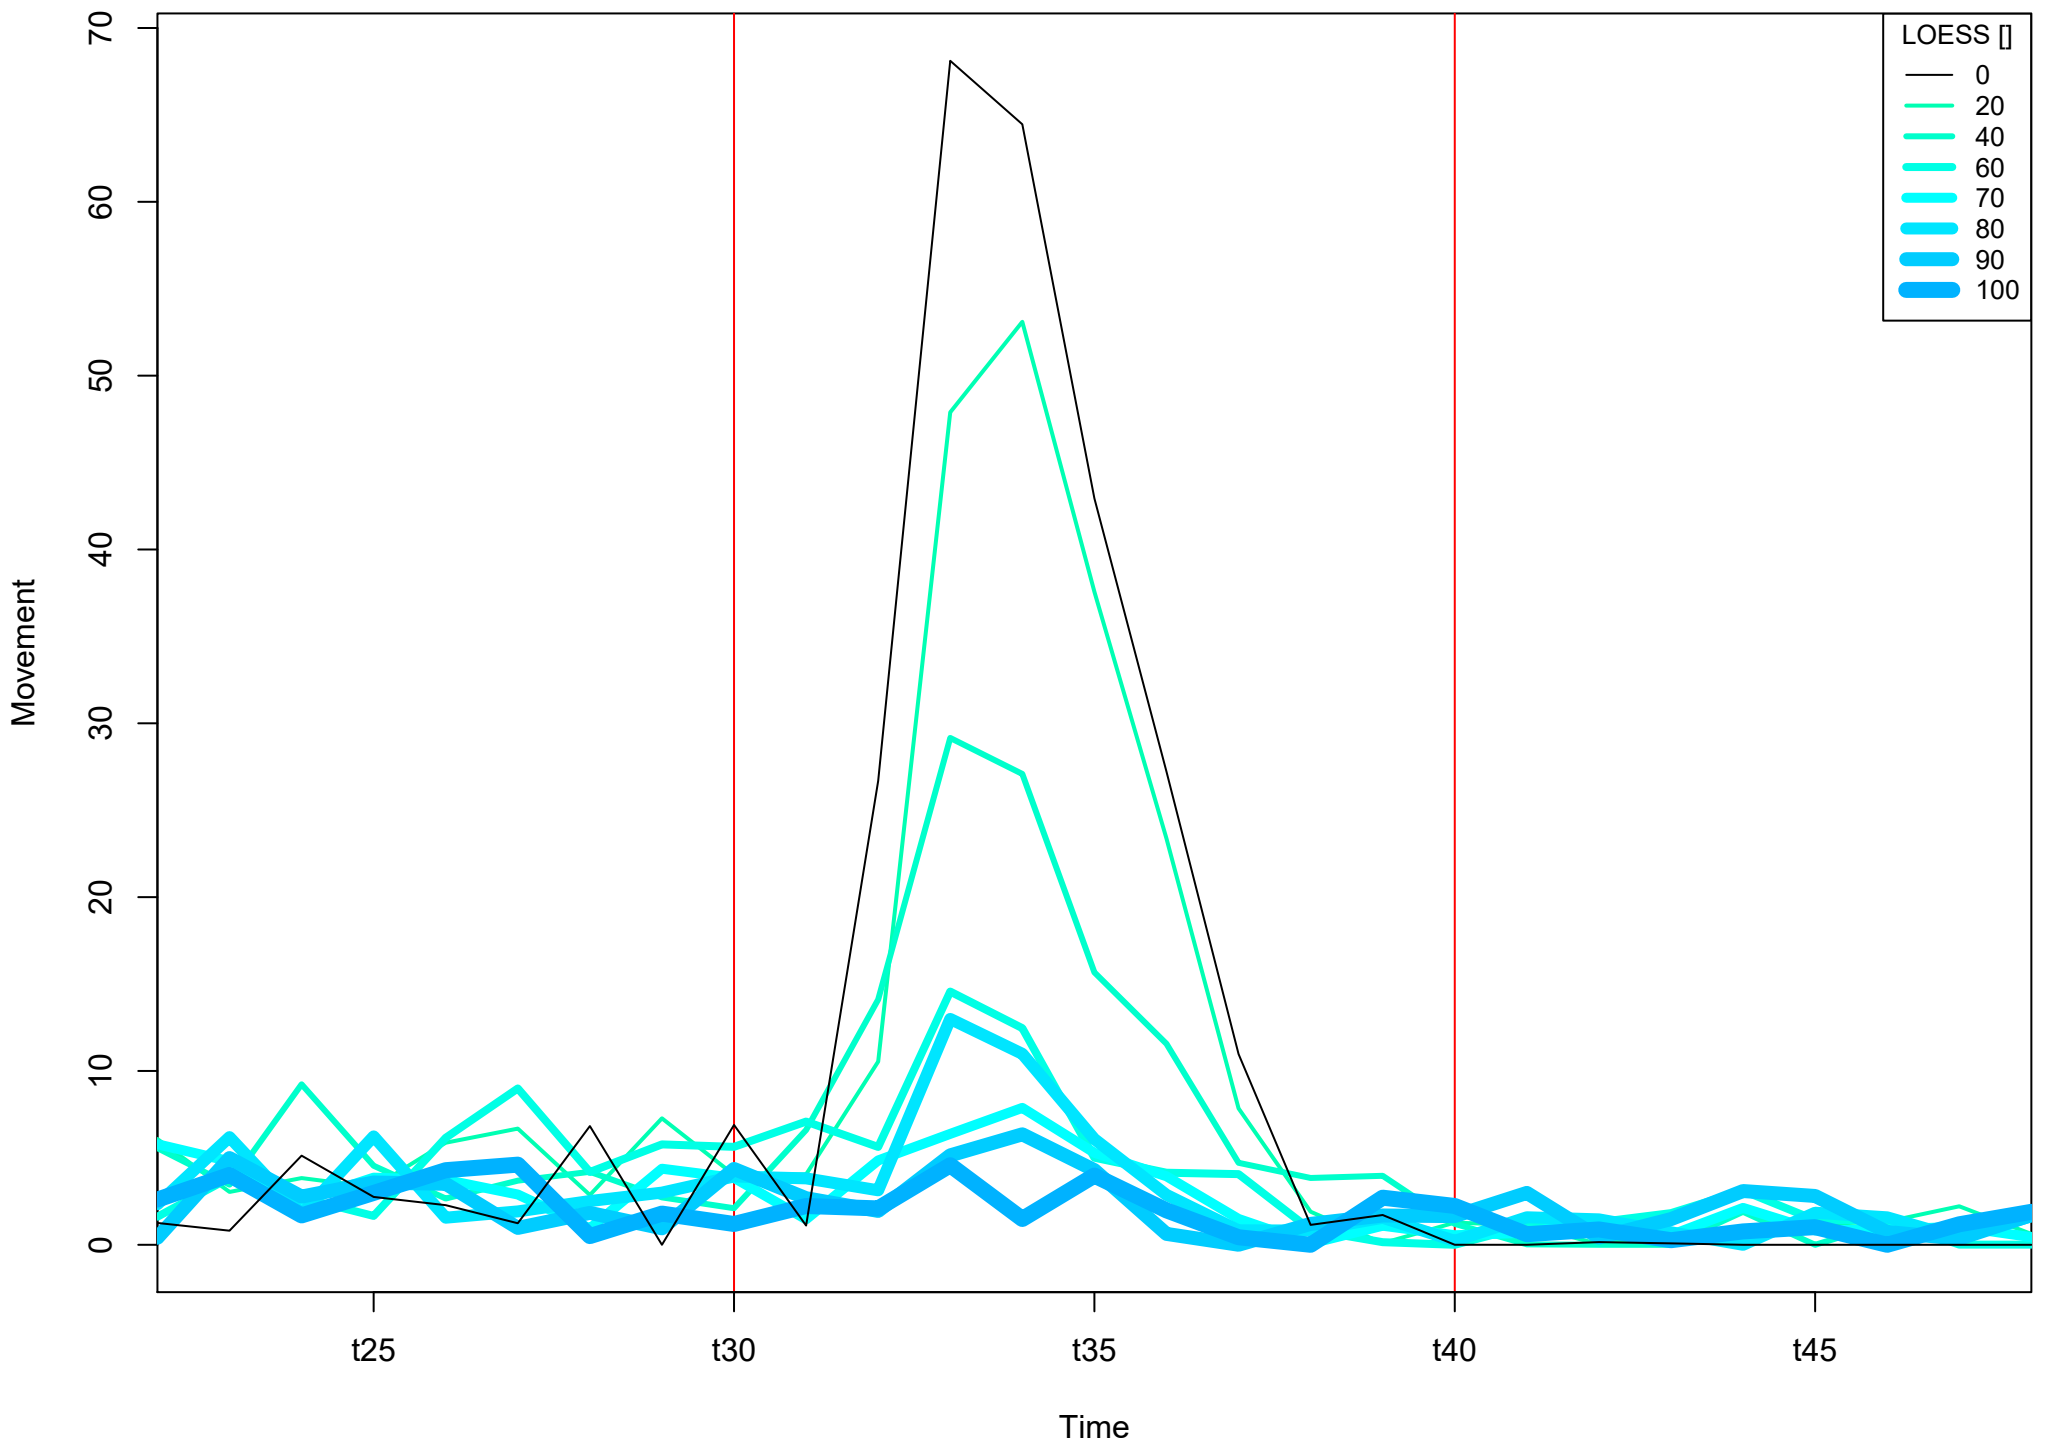



# TPP

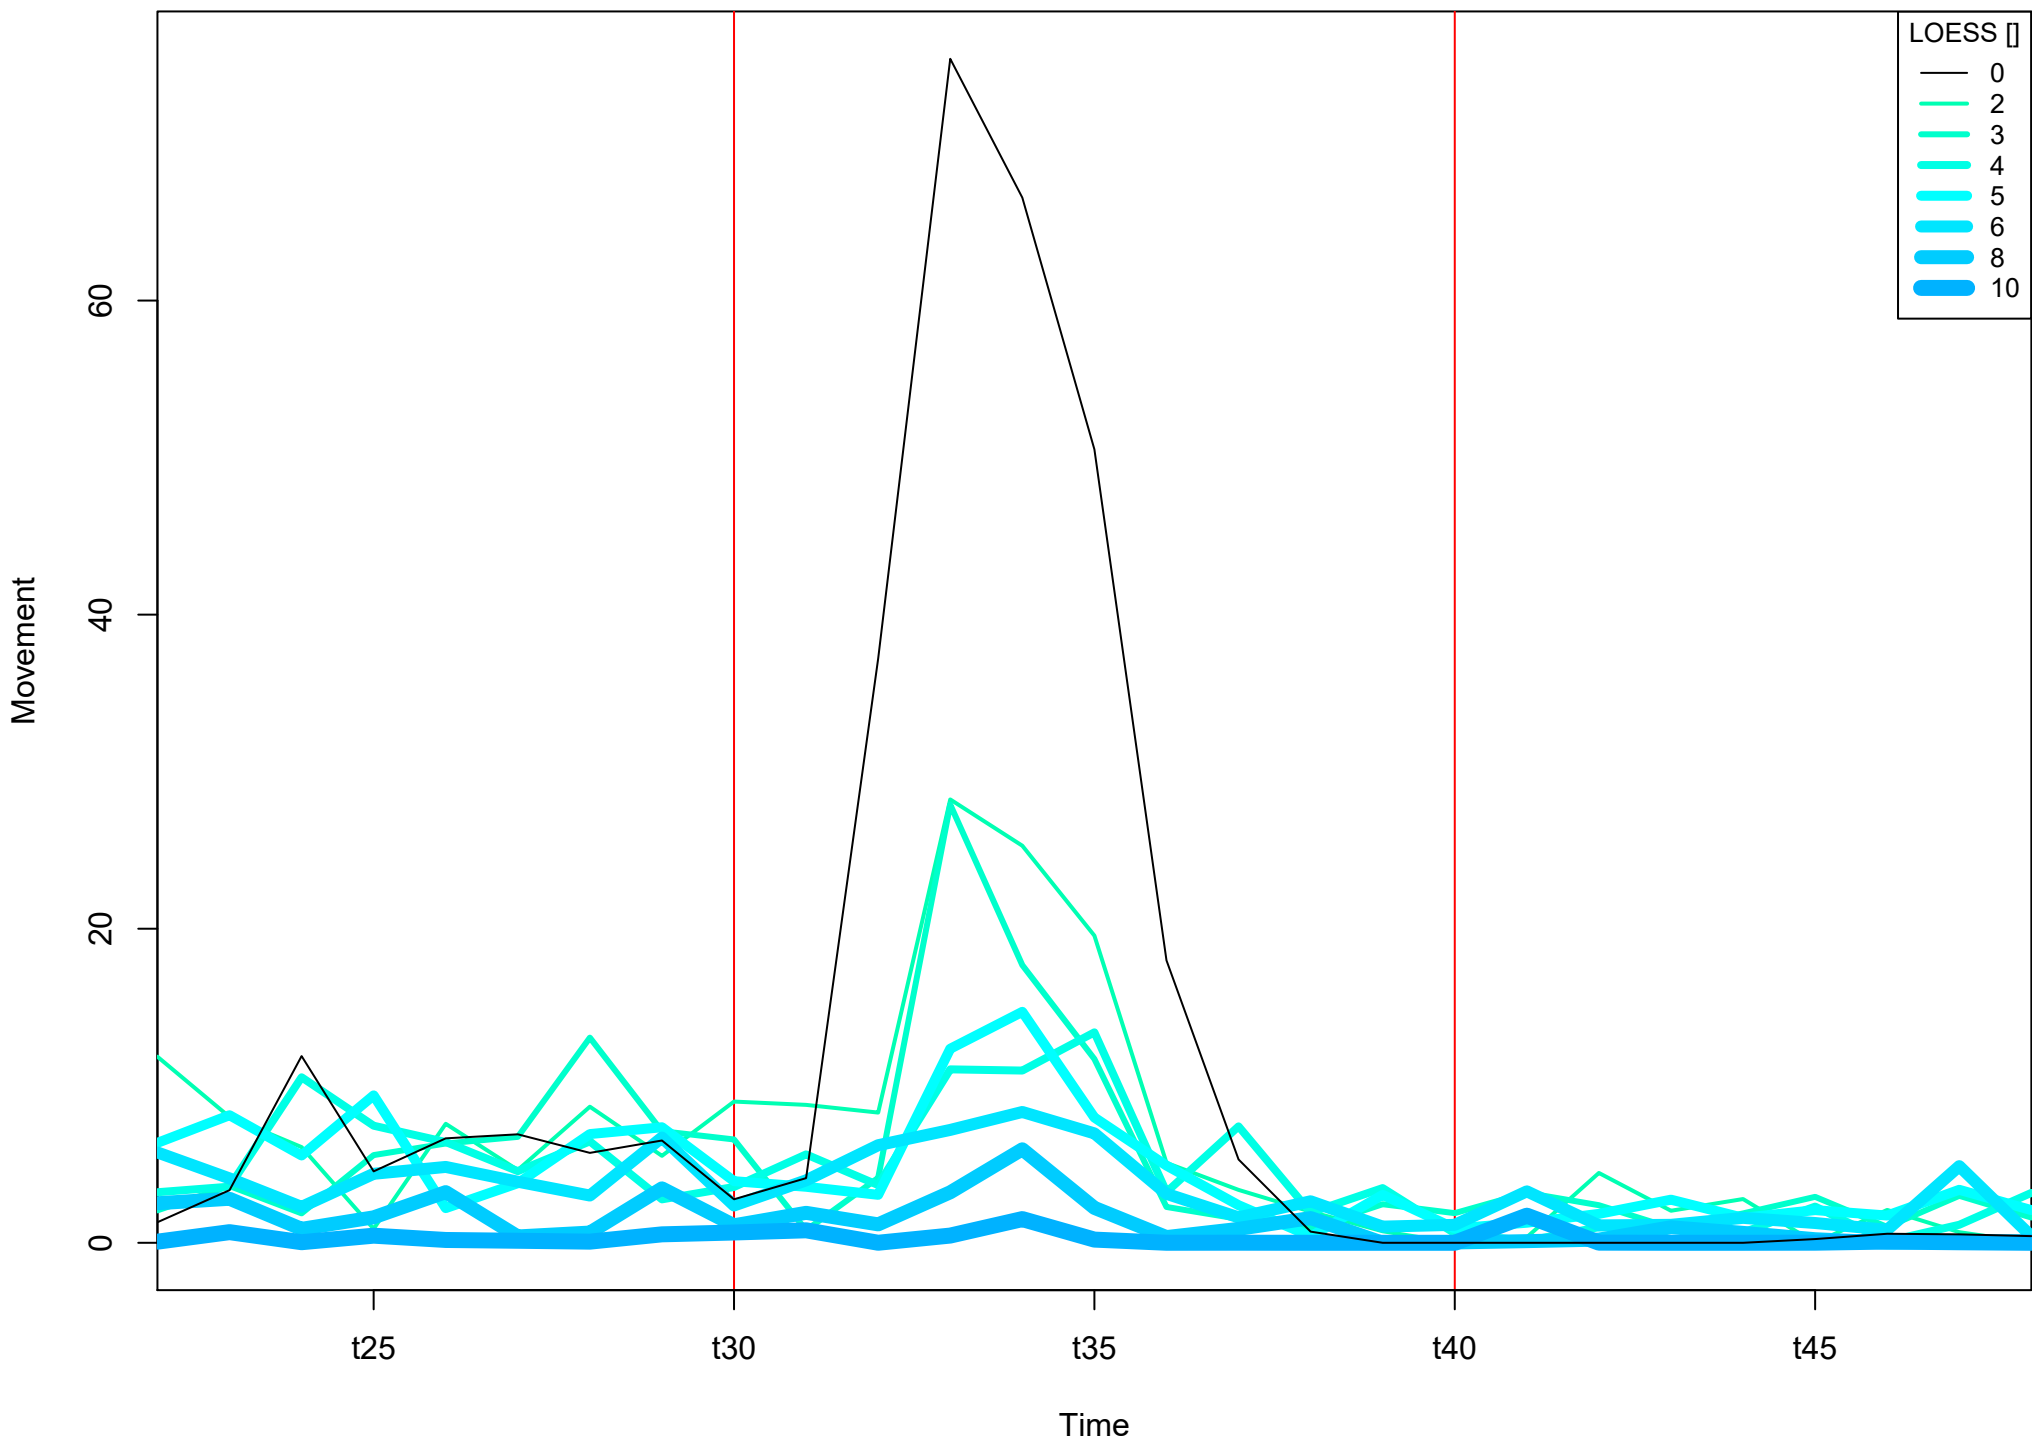



# G14 Mix

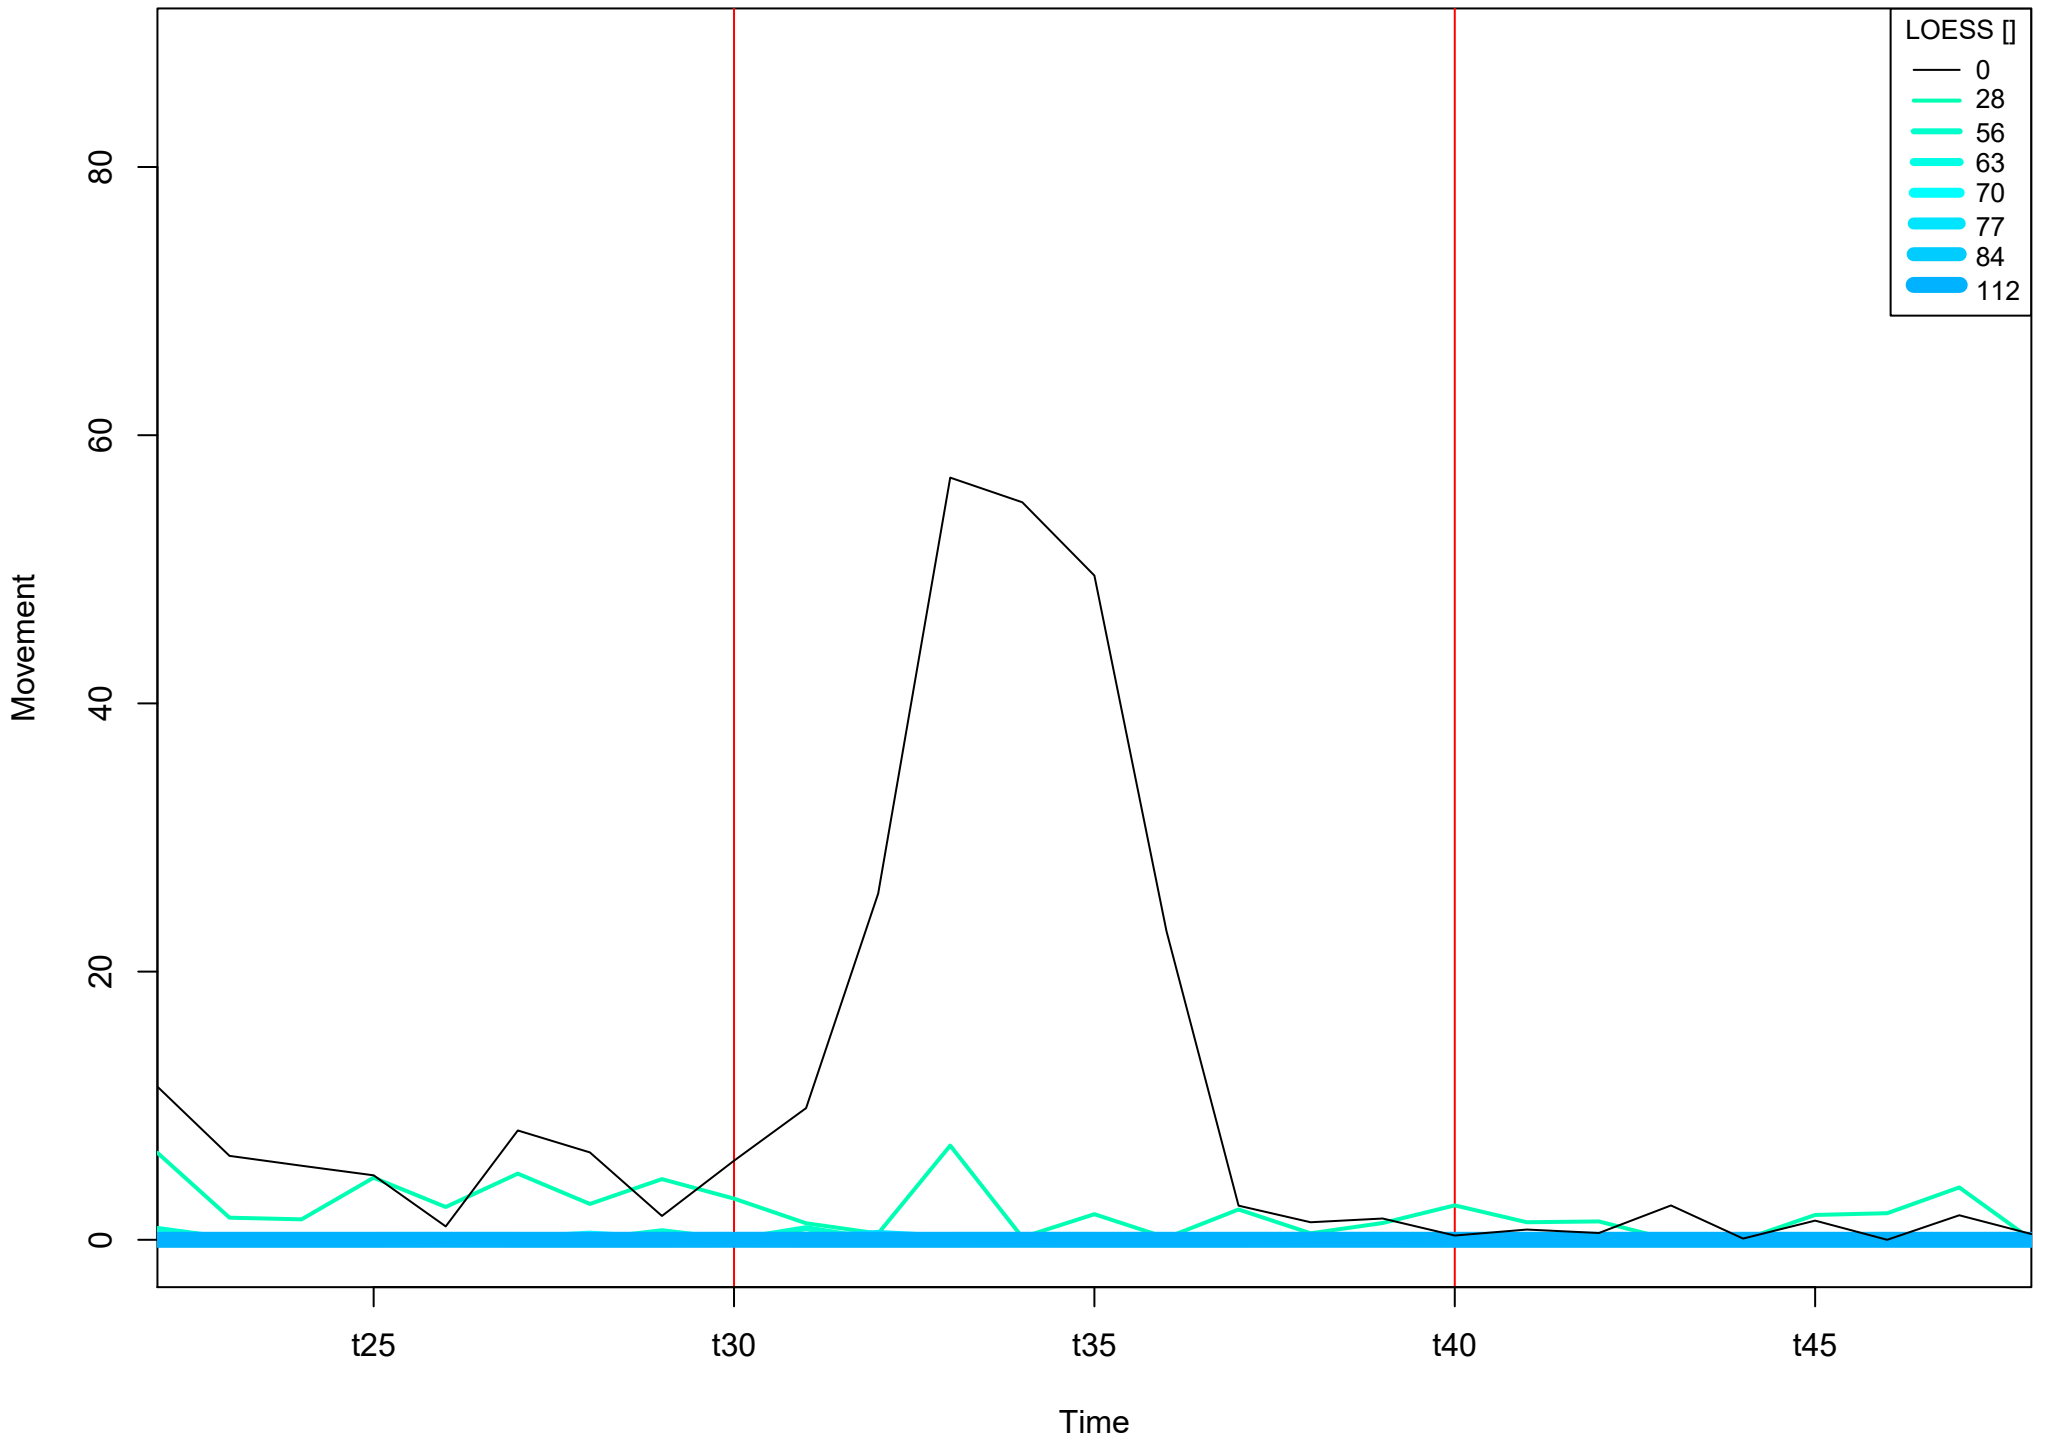



# ZF Equi-Mix

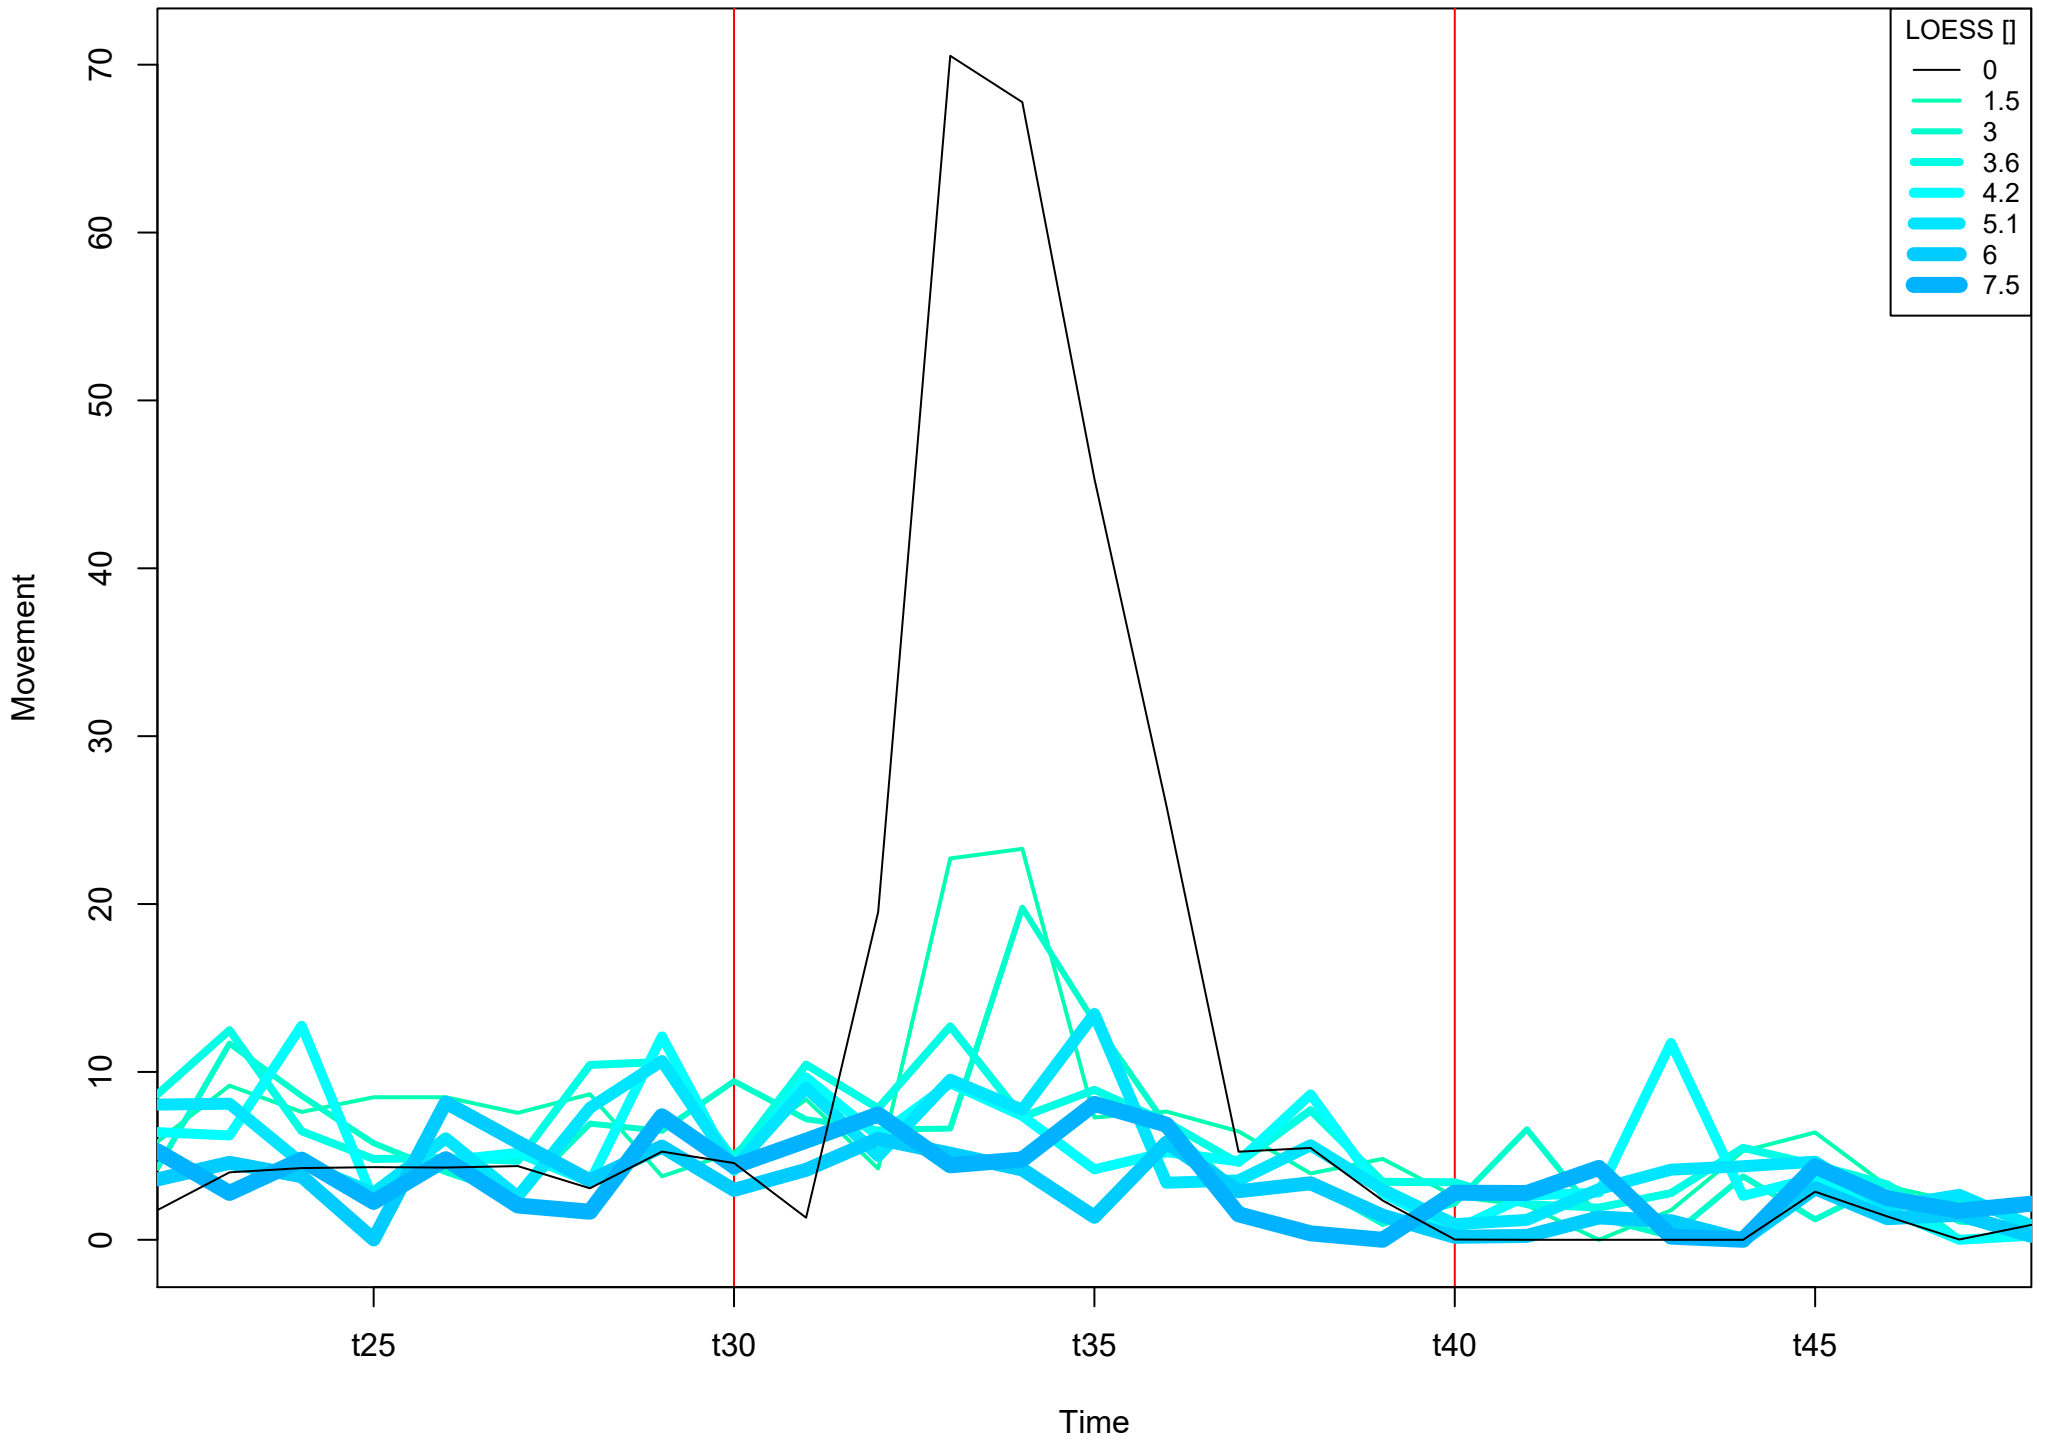



# ZF BMC Mix

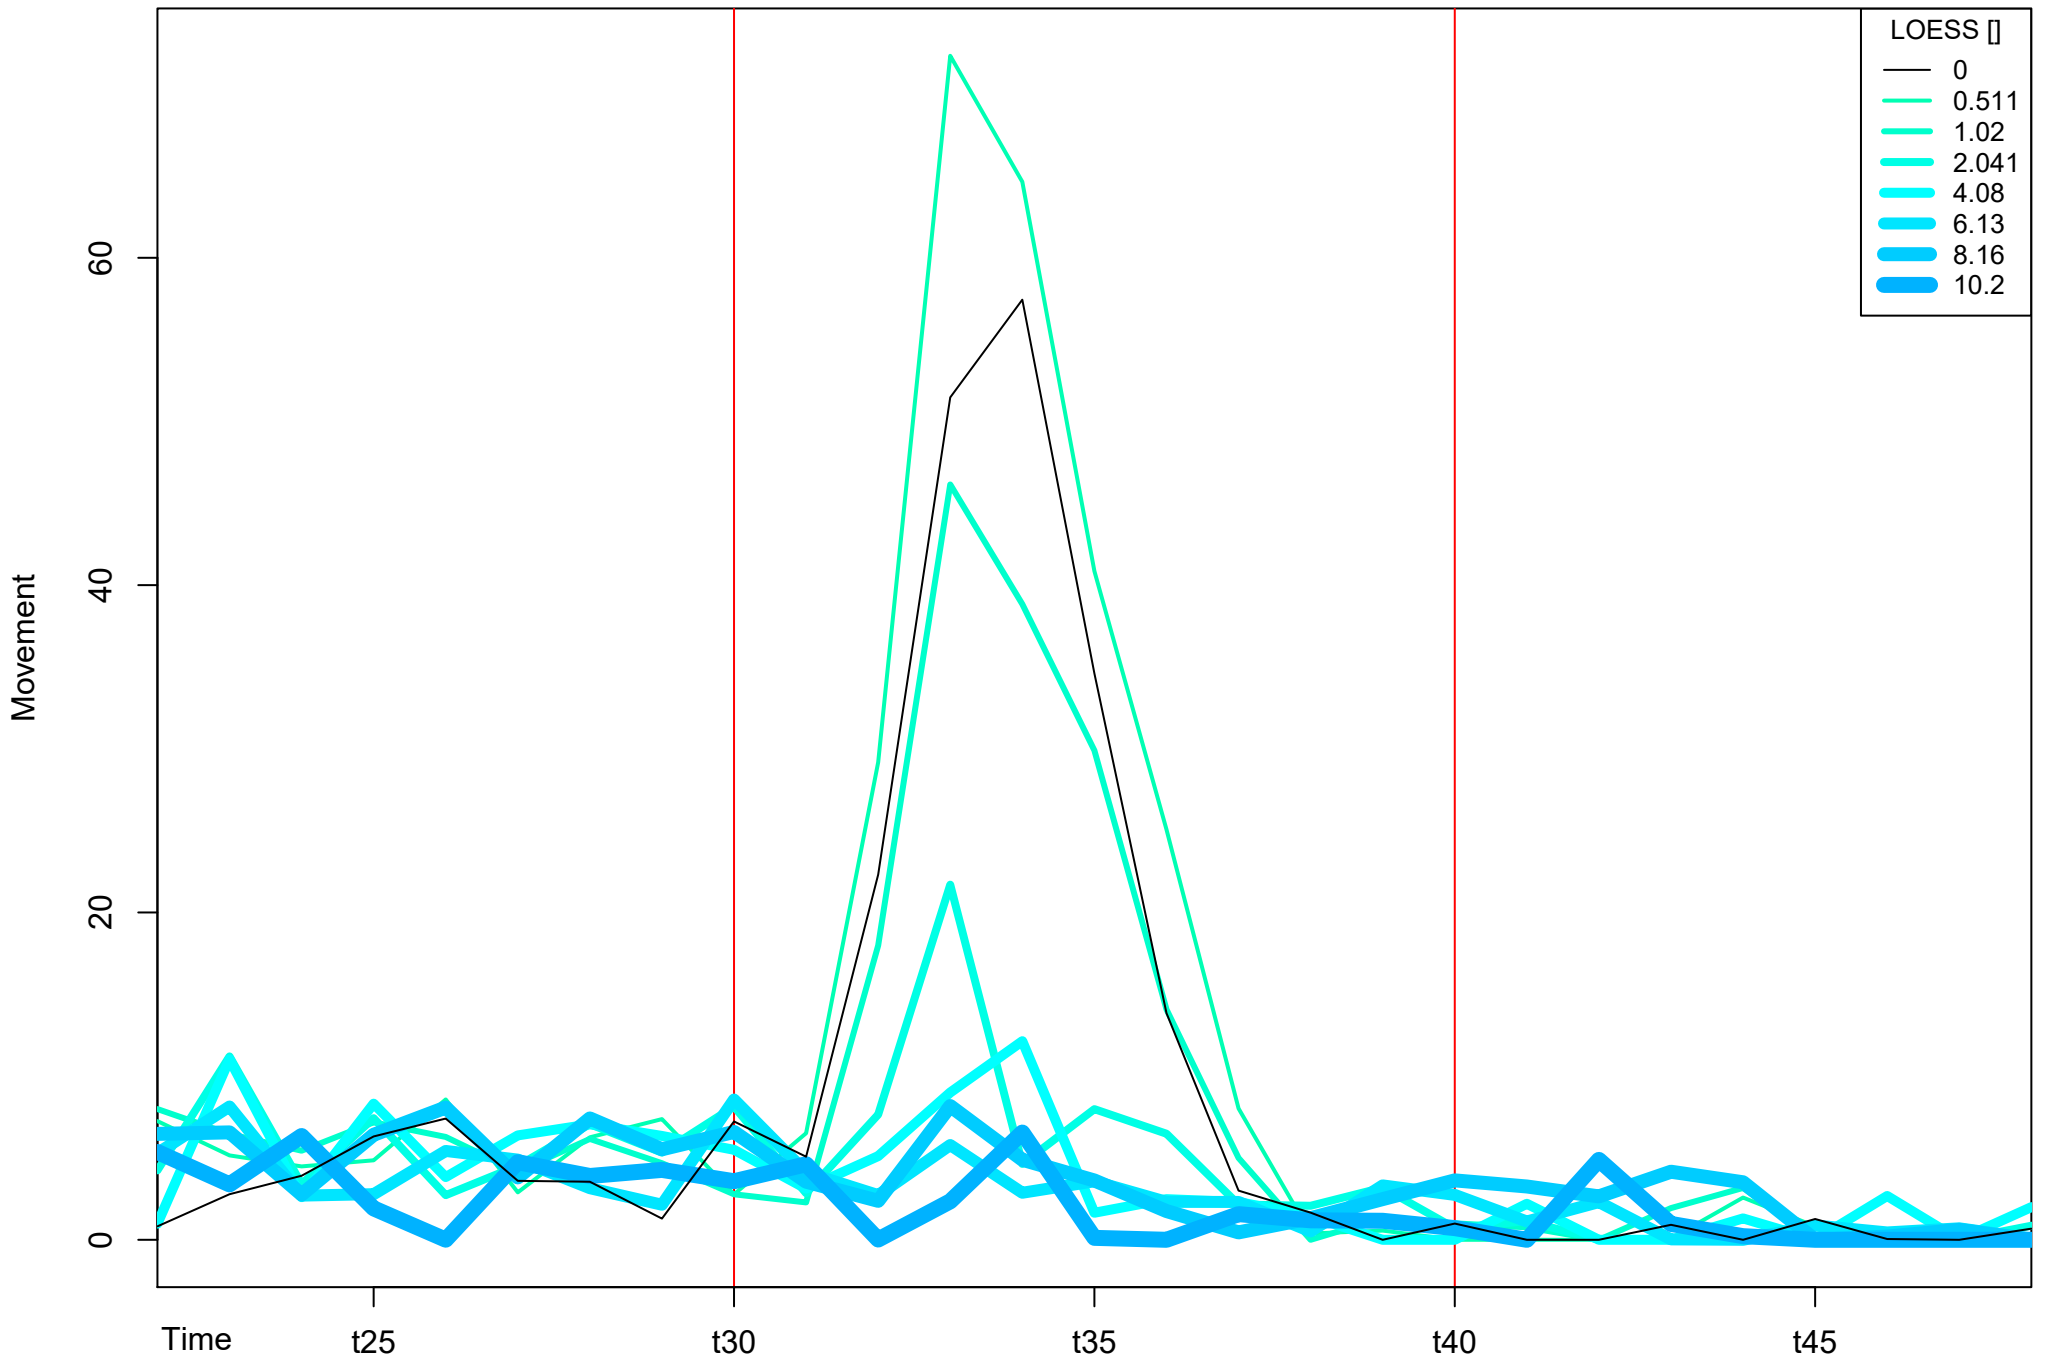

**Figure S9.** Movement versus time plots for zebrafish EPR for each chemical and mixture. Red lines delineate background, excitatory, and refractory periods.



**Table S6.** Embryonic photomotor response (EPR) compiled data for standard and chorion-on conditions. B = background; E = excitation; R = refractory. For significance column, 1 = significant, 0 = not significant.

| chemical.name | concentration (μM) | Interval | Movement.peak | Movement.sd | Movement.n | ks.stat     | ks.pval     | diff         | delta        | sig |
|---------------|--------------------|----------|---------------|-------------|------------|-------------|-------------|--------------|--------------|-----|
| AHTN          | 0                  | B        | 3.592234239   | 11.08448112 | 315        | 0           | 1           | 0            | 0            | 0   |
| AHTN          | 0                  | E        | 21.48596055   | 38.43747733 | 315        | 0           | 1           | 0            | 0            | 0   |
| AHTN          | 0                  | R        | 0.228097092   | 3.314125031 | 280        | 0           | 1           | 0            | 0            | 0   |
| AHTN          | 10                 | B        | 4.914847833   | 12.70615111 | 315        | 0.066666667 | 0.485805331 | 1.322613594  | 0.368186902  | 0   |
| AHTN          | 10                 | E        | 21.45158123   | 39.54982964 | 315        | 0.034920635 | 0.990716312 | -0.034379313 | -0.001600083 | 0   |
| AHTN          | 10                 | R        | 1.537233332   | 10.42573299 | 280        | 0.025       | 0.999993621 | 1.30913624   | 5.739381544  | 0   |
| AHTN          | 30                 | B        | 4.605114462   | 12.23277016 | 324        | 0.042592593 | 0.93409286  | 1.012880223  | 0.281963858  | 0   |
| AHTN          | 30                 | E        | 5.284020508   | 15.33081809 | 324        | 0.236684303 | 3.38E-08    | -16.20194004 | -0.754071013 | 1   |
| AHTN          | 30                 | R        | 0.542308712   | 4.464145627 | 288        | 0.017162698 | 1           | 0.31421162   | 1.377534529  | 0   |
| AHTN          | 50                 | B        | 4.738491264   | 11.19085184 | 306        | 0.092156863 | 0.143172114 | 1.146257025  | 0.319093063  | 0   |
| AHTN          | 50                 | E        | 2.949544973   | 8.628531669 | 306        | 0.259290383 | 1.73E-09    | -18.53641557 | -0.86272222  | 1   |
| AHTN          | 50                 | R        | 0.470409417   | 3.497790733 | 272        | 0.018592437 | 1           | 0.242312325  | 1.062320976  | 0   |
| AHTN          | 60                 | B        | 5.244157468   | 11.13466755 | 315        | 0.120634921 | 0.020425302 | 1.651923229  | 0.459859552  | 0   |
| AHTN          | 60                 | E        | 3.929949659   | 12.60836827 | 315        | 0.276190476 | 7.34E-11    | -17.55601089 | -0.817092205 | 1   |
| AHTN          | 60                 | R        | 0.926493923   | 5.779300716 | 280        | 0.032142857 | 0.998697677 | 0.698396831  | 3.061840138  | 0   |
| AHTN          | 70                 | B        | 4.855484375   | 10.29012908 | 297        | 0.116017316 | 0.032645129 | 1.263250136  | 0.351661404  | 0   |
| AHTN          | 70                 | E        | 1.531883912   | 5.456803484 | 297        | 0.308898509 | 4.28E-13    | -19.95407663 | -0.928703029 | 1   |
| AHTN          | 70                 | R        | 1.201879052   | 5.682355636 | 264        | 0.061038961 | 0.691977884 | 0.97378196   | 4.269155525  | 0   |
| AHTN          | 80                 | B        | 4.121863799   | 9.352289281 | 279        | 0.110803891 | 0.052871235 | 0.52962956   | 0.147437368  | 0   |
| AHTN          | 80                 | E        | 2.022741324   | 6.081573117 | 279        | 0.27014849  | 8.36E-10    | -19.46321922 | -0.905857533 | 1   |
| AHTN          | 80                 | R        | 1.214927634   | 6.800147385 | 248        | 0.053341014 | 0.848400899 | 0.986830542  | 4.326361786  | 0   |
| AHTN          | 100                | B        | 3.971147412   | 8.672994407 | 315        | 0.133333333 | 0.007395727 | 0.378913173  | 0.105481199  | 0   |
| AHTN          | 100                | E        | 1.208113261   | 5.398625965 | 315        | 0.320634921 | 1.72E-14    | -20.27784729 | -0.943771969 | 1   |
| AHTN          | 100                | R        | 0.810856864   | 4.317290452 | 280        | 0.05        | 0.875195794 | 0.582759772  | 2.554875939  | 0   |
| BBP           | 0                  | B        | 6.479689714   | 13.1465797  | 315        | 0           | 1           | 0            | 0            | 0   |
| BBP           | 0                  | E        | 16.74320678   | 26.45710722 | 315        | 0           | 1           | 0            | 0            | 0   |
| BBP           | 0                  | R        | 0.859452041   | 6.144433438 | 280        | 0           | 1           | 0            | 0            | 0   |
| BBP           | 2.25               | B        | 6.87538774    | 14.67559225 | 324        | 0.036419753 | 0.983894313 | 0.395698025  | 0.061067434  | 0   |
| BBP           | 2.25               | E        | 5.886904063   | 15.51490623 | 324        | 0.255467372 | 1.77E-09    | -10.85630272 | -0.648400444 | 1   |
| BBP           | 2.25               | R        | 0.887119682   | 7.518758416 | 288        | 0.011507937 | 1           | 0.027667642  | 0.032192188  | 0   |
| BBP           | 3                  | B        | 6.383569057   | 12.29287782 | 297        | 0.035594036 | 0.99024792  | -0.096120658 | -0.014834145 | 0   |
| BBP           | 3                  | E        | 3.907126886   | 12.1421408  | 297        | 0.291871092 | 9.77E-12    | -12.83607989 | -0.766644052 | 1   |
| BBP           | 3                  | R        | 1.106770784   | 6.428979859 | 264        | 0.021320346 | 0.999999979 | 0.247318743  | 0.287763286  | 0   |
| BBP           | 3.5                | B        | 7.467476216   | 13.58283923 | 306        | 0.06302521  | 0.5683867   | 0.987786502  | 0.152443488  | 0   |
| BBP           | 3.5                | E        | 3.364637257   | 10.30871153 | 306        | 0.28898226  | 1.10E-11    | -13.37856952 | -0.799044633 | 1   |
| BBP           | 3.5                | R        | 0.704018233   | 4.463320774 | 272        | 0.010714286 | 1           | -0.155433807 | -0.180852218 | 0   |
| BBP           | 4                  | B        | 7.484844275   | 13.46549097 | 315        | 0.088888889 | 0.165909354 | 1.005154561  | 0.155123872  | 0   |
| BBP           | 4                  | E        | 2.766548276   | 9.456435976 | 315        | 0.314285714 | 6.14E-14    | -13.9766585  | -0.834765925 | 1   |
| BBP           | 4                  | R        | 0.782412492   | 5.870696029 | 280        | 0.014285714 | 1           | -0.077039548 | -0.089637984 | 0   |



|     |      |   |             |             |     |             |             |              |              |   |
|-----|------|---|-------------|-------------|-----|-------------|-------------|--------------|--------------|---|
| BBP | 4.5  | B | 7.468309072 | 14.65310041 | 315 | 0.06031746  | 0.615432501 | 0.988619358  | 0.152572021  | 0 |
| BBP | 4.5  | E | 2.730378905 | 9.957339941 | 315 | 0.333333333 | 1.22E-15    | -14.01282787 | -0.836926167 | 1 |
| BBP | 4.5  | R | 0.497891751 | 5.193156246 | 280 | 0.017857143 | 1           | -0.36156029  | -0.420686987 | 0 |
| BBP | 5    | B | 5.557470203 | 11.89603334 | 306 | 0.048646125 | 0.856152922 | -0.922219511 | -0.142324641 | 0 |
| BBP | 5    | E | 3.327830064 | 11.74376257 | 306 | 0.307936508 | 3.29E-13    | -13.41537671 | -0.801242969 | 1 |
| BBP | 5    | R | 0.264086896 | 2.979613567 | 272 | 0.021218487 | 0.999999976 | -0.595365145 | -0.692726431 | 0 |
| BBP | 8    | B | 4.592014065 | 11.23174708 | 180 | 0.073809524 | 0.560572153 | -1.88767565  | -0.29132192  | 0 |
| BBP | 8    | E | 1.971330325 | 7.42940629  | 180 | 0.328571429 | 3.63E-11    | -14.77187645 | -0.882260886 | 1 |
| BBP | 8    | R | 0.800645423 | 7.782513657 | 160 | 0.026785714 | 0.999999571 | -0.058806618 | -0.068423385 | 0 |
| BHT | 0    | B | 3.878804243 | 11.84619925 | 306 | 0           | 1           | 0            | 0            | 0 |
| BHT | 0    | E | 24.56909242 | 41.37163012 | 306 | 0           | 1           | 0            | 0            | 0 |
| BHT | 0    | R | 0.008457158 | 0.139479017 | 272 | 0           | 1           | 0            | 0            | 0 |
| BHT | 1    | B | 4.530554356 | 13.11685096 | 306 | 0.032679739 | 0.996738369 | 0.651750113  | 0.168028617  | 0 |
| BHT | 1    | E | 28.20974774 | 39.26771406 | 306 | 0.104575163 | 0.070418328 | 3.640655315  | 0.148180293  | 0 |
| BHT | 1    | R | 0.292170789 | 3.303903665 | 272 | 0.011029412 | 1           | 0.283713631  | 33.54716128  | 0 |
| BHT | 2.54 | B | 4.365864496 | 12.34948754 | 324 | 0.033587509 | 0.99429185  | 0.487060253  | 0.125569692  | 0 |
| BHT | 2.54 | E | 23.51646861 | 37.77271043 | 324 | 0.035221496 | 0.989781516 | -1.052623809 | -0.042843414 | 0 |
| BHT | 2.54 | R | 0.098861919 | 1.676459663 | 288 | 0.003472222 | 1           | 0.090404761  | 10.6897335   | 0 |
| BHT | 6.45 | B | 4.9922567   | 13.74263098 | 324 | 0.033587509 | 0.99429185  | 1.113452457  | 0.287060751  | 0 |
| BHT | 6.45 | E | 17.99353211 | 34.20201143 | 324 | 0.085330428 | 0.201973668 | -6.575560315 | -0.267635458 | 0 |
| BHT | 6.45 | R | 0.354003995 | 3.546859726 | 288 | 0.017156863 | 1           | 0.345546837  | 40.85850735  | 0 |
| BHT | 16.4 | B | 4.680334871 | 13.11945341 | 315 | 0.033146592 | 0.99562075  | 0.801530628  | 0.206643743  | 0 |
| BHT | 16.4 | E | 23.99863618 | 37.37922381 | 315 | 0.053034547 | 0.775196727 | -0.57045624  | -0.02321845  | 0 |
| BHT | 16.4 | R | 0.638950796 | 6.171225631 | 280 | 0.010714286 | 1           | 0.630493639  | 74.55148246  | 0 |
| BHT | 35   | B | 4.953141228 | 12.0401046  | 324 | 0.056281772 | 0.701154408 | 1.074336985  | 0.276976335  | 0 |
| BHT | 35   | E | 22.15999759 | 36.34081261 | 324 | 0.035947712 | 0.987108925 | -2.409094834 | -0.09805388  | 0 |
| BHT | 35   | R | 0.233742157 | 2.830847153 | 288 | 0.006944444 | 1           | 0.225284999  | 26.63838247  | 0 |
| BHT | 74.8 | B | 4.737860564 | 13.12246137 | 315 | 0.03557423  | 0.989410592 | 0.859056321  | 0.221474523  | 0 |
| BHT | 74.8 | E | 21.39949759 | 35.35216418 | 315 | 0.051820728 | 0.798770587 | -3.16959483  | -0.129007404 | 0 |
| BHT | 74.8 | R | 0.560050855 | 4.834550891 | 280 | 0.017857143 | 1           | 0.551593698  | 65.22211385  | 0 |
| BHT | 100  | B | 4.002838303 | 11.37288873 | 315 | 0.029505135 | 0.999261105 | 0.12403406   | 0.031977396  | 0 |
| BHT | 100  | E | 15.5780836  | 29.41271636 | 315 | 0.11372549  | 0.036085543 | -8.991008822 | -0.365947943 | 0 |
| BHT | 100  | R | 1.087472048 | 7.75908644  | 280 | 0.035609244 | 0.994810796 | 1.07901489   | 127.5859973  | 0 |
| BP  | 0    | B | 3.655194573 | 10.75814831 | 306 | 0           | 1           | 0            | 0            | 0 |
| BP  | 0    | E | 27.69515756 | 44.41349847 | 306 | 0           | 1           | 0            | 0            | 0 |
| BP  | 0    | R | 0.165871955 | 2.116876849 | 272 | 0           | 1           | 0            | 0            | 0 |
| BP  | 20   | B | 5.398555754 | 12.64267663 | 324 | 0.078068264 | 0.292821493 | 1.743361181  | 0.476954413  | 0 |
| BP  | 20   | E | 16.7473773  | 29.57155197 | 324 | 0.111837328 | 0.039025727 | -10.94778026 | -0.395295829 | 0 |
| BP  | 20   | R | 0.792100824 | 6.370107259 | 288 | 0.017156863 | 1           | 0.626228869  | 3.77537521   | 0 |
| BP  | 40   | B | 3.778658785 | 11.22992355 | 315 | 0.040149393 | 0.963813131 | 0.123464212  | 0.03377774   | 0 |



|    |     |   |             |             |     |             |             |              |              |   |
|----|-----|---|-------------|-------------|-----|-------------|-------------|--------------|--------------|---|
| BP | 40  | E | 9.9393053   | 24.17197678 | 315 | 0.20140056  | 6.80E-06    | -17.75585226 | -0.641117575 | 1 |
| BP | 40  | R | 0.790085577 | 4.583586963 | 280 | 0.028361345 | 0.999888151 | 0.624213621  | 3.763225795  | 0 |
| BP | 50  | B | 4.919785348 | 12.20165758 | 324 | 0.081154684 | 0.251133918 | 1.264590776  | 0.345970851  | 0 |
| BP | 50  | E | 8.491940571 | 18.46887788 | 324 | 0.197167756 | 9.71E-06    | -19.20321699 | -0.693378146 | 1 |
| BP | 50  | R | 0.996229192 | 5.993321448 | 288 | 0.034313725 | 0.996550718 | 0.830357236  | 5.006013429  | 0 |
| BP | 60  | B | 4.246604377 | 11.15084118 | 297 | 0.041592395 | 0.956746136 | 0.591409805  | 0.161799815  | 0 |
| BP | 60  | E | 7.243879555 | 16.82514594 | 297 | 0.222519311 | 6.59E-07    | -20.451278   | -0.738442378 | 1 |
| BP | 60  | R | 2.177619461 | 8.180751609 | 264 | 0.098707665 | 0.146923012 | 2.011747506  | 12.12831609  | 0 |
| BP | 70  | B | 4.464883512 | 11.0769418  | 306 | 0.052287582 | 0.797010175 | 0.80968894   | 0.221517329  | 0 |
| BP | 70  | E | 6.369997028 | 14.93944507 | 306 | 0.22875817  | 2.22E-07    | -21.32516053 | -0.769996    | 1 |
| BP | 70  | R | 1.790205288 | 7.023721431 | 272 | 0.073529412 | 0.454008497 | 1.624333332  | 9.792694179  | 0 |
| BP | 80  | B | 3.626615872 | 9.788269006 | 297 | 0.022974847 | 0.999998364 | -0.0285787   | -0.007818654 | 0 |
| BP | 80  | E | 4.572196589 | 11.92012596 | 297 | 0.25103981  | 1.12E-08    | -23.12296097 | -0.834909891 | 1 |
| BP | 80  | R | 0.702417829 | 4.475380374 | 264 | 0.026737968 | 0.999979376 | 0.536545873  | 3.234699151  | 0 |
| BP | 100 | B | 2.415308148 | 8.294408012 | 306 | 0.04248366  | 0.945264713 | -1.239886425 | -0.339212154 | 0 |
| BP | 100 | E | 2.175245092 | 8.296539279 | 306 | 0.343137255 | 4.44E-16    | -25.51991247 | -0.921457566 | 1 |
| BP | 100 | R | 0.941058195 | 5.646253868 | 272 | 0.033088235 | 0.998362206 | 0.77518624   | 4.673401466  | 0 |
| BS | 0   | B | 2.084986428 | 8.774449899 | 315 | 0           | 1           | 0            | 0            | 0 |
| BS | 0   | E | 30.18573687 | 42.07117213 | 315 | 0           | 1           | 0            | 0            | 0 |
| BS | 0   | R | 0.305601944 | 1.68571079  | 280 | 0           | 1           | 0            | 0            | 0 |
| BS | 5   | B | 3.760126997 | 11.13496634 | 315 | 0.073015873 | 0.370570972 | 1.675140569  | 0.803429963  | 0 |
| BS | 5   | E | 17.65466496 | 30.67437898 | 315 | 0.174603175 | 0.000135028 | -12.5310719  | -0.415132218 | 0 |
| BS | 5   | R | 0.926106585 | 5.659940211 | 280 | 0.028571429 | 0.999847967 | 0.620504641  | 2.030434204  | 0 |
| BS | 10  | B | 4.300847139 | 11.73743075 | 306 | 0.10681606  | 0.057911707 | 2.215860711  | 1.062769849  | 0 |
| BS | 10  | E | 11.91583498 | 24.2450803  | 306 | 0.283940243 | 2.70E-11    | -18.26990189 | -0.605249492 | 1 |
| BS | 10  | R | 1.232830377 | 6.401546017 | 272 | 0.038130252 | 0.988060956 | 0.927228433  | 3.034105148  | 0 |
| BS | 14  | B | 3.621870465 | 10.77052221 | 288 | 0.118253968 | 0.029760317 | 1.536884037  | 0.737119444  | 0 |
| BS | 14  | E | 8.198979929 | 21.48808771 | 288 | 0.350694444 | 2.22E-16    | -21.98675694 | -0.728382316 | 1 |
| BS | 14  | R | 1.235453328 | 6.63290876  | 256 | 0.0359375   | 0.995232851 | 0.929851384  | 3.042688049  | 0 |
| BS | 18  | B | 4.112554249 | 10.79809309 | 306 | 0.152567694 | 0.001454908 | 2.02756782   | 0.97246092   | 1 |
| BS | 18  | E | 4.822175489 | 12.90683727 | 306 | 0.375443511 | 0           | -25.36356138 | -0.840249867 | 1 |
| BS | 18  | R | 0.607240101 | 3.574439833 | 272 | 0.019852941 | 0.999999998 | 0.301638156  | 0.987029572  | 0 |
| BS | 22  | B | 2.861345091 | 7.314234103 | 315 | 0.165079365 | 0.000374103 | 0.776358663  | 0.372356699  | 0 |
| BS | 22  | E | 0.862199581 | 5.228490655 | 315 | 0.511111111 | 0           | -29.32353728 | -0.971436855 | 1 |
| BS | 22  | R | 0.699714503 | 4.420357305 | 280 | 0.028571429 | 0.999847967 | 0.394112559  | 1.289627131  | 0 |
| BS | 30  | B | 0.688726168 | 2.748941856 | 315 | 0.073015873 | 0.370570972 | -1.39626026  | -0.669673548 | 0 |
| BS | 30  | E | 0.115534063 | 1.000749571 | 315 | 0.533333333 | 0           | -30.0702028  | -0.996172561 | 1 |
| BS | 30  | R | 0.477352919 | 4.01328821  | 280 | 0.025       | 0.999993621 | 0.171750975  | 0.562008776  | 0 |
| BS | 50  | B | 0.000678168 | 0.011508899 | 288 | 0.076190476 | 0.346858738 | -2.08430826  | -0.999674737 | 0 |
| BS | 50  | E | 0           | 0           | 288 | 0.568253968 | 0           | -30.18573687 | -1           | 1 |



|      |      |   |             |             |     |             |             |              |              |    |
|------|------|---|-------------|-------------|-----|-------------|-------------|--------------|--------------|----|
| BS   | 50   | R | 0.718943437 | 6.011746215 | 256 | 0.016183036 | 1           | 0.413341493  | 1.352548634  | 0  |
| DBP  | 0    | B | 5.827035352 | 13.53683716 | 306 | 0           | 1           | 0            | 0            | 0  |
| DBP  | 0    | E | 25.52281807 | 37.50485769 | 306 | 0           | 1           | 0            | 0            | 0  |
| DBP  | 0    | R | 0.192998801 | 2.991431961 | 272 | 0           | 1           | 0            | 0            | 0  |
| DBP  | 1    | B | 6.800206482 | 13.32723138 | 297 | 0.057239057 | 0.706728303 | 0.97317113   | 0.167009649  | 0  |
| DBP  | 1    | E | 13.0835267  | 25.45440845 | 297 | 0.188057041 | 4.69E-05    | -12.43929137 | -0.487379228 | 0  |
| DBP  | 1    | R | 0.391693397 | 3.703192965 | 264 | 0.007687166 | 1           | 0.198694596  | 1.029512076  | 0  |
| DBP  | 2    | B | 6.736455759 | 13.75442484 | 315 | 0.04659197  | 0.889035857 | 0.909420407  | 0.156069142  | 0  |
| DBP  | 2    | E | 11.34734666 | 23.45599672 | 315 | 0.213912232 | 1.35E-06    | -14.17547141 | -0.55540385  | 1  |
| DBP  | 2    | R | 0.098818899 | 1.649653305 | 280 | 0.006932773 | 1           | -0.094179902 | -0.4879818   | 0  |
| DBP  | 3    | B | 6.479749088 | 13.77029665 | 288 | 0.03125     | 0.998679984 | 0.652713736  | 0.11201472   | 0  |
| DBP  | 3    | E | 6.150610775 | 16.37909855 | 288 | 0.304534314 | 2.24E-12    | -19.37220729 | -0.759015217 | 1  |
| DBP  | 3    | R | 0.899081983 | 6.41891139  | 256 | 0.023897059 | 0.999999298 | 0.706083182  | 3.65848481   | 0  |
| DBP  | 4    | B | 6.571225657 | 14.38710875 | 288 | 0.03125     | 0.998679984 | 0.744190305  | 0.127713367  | 0  |
| DBP  | 4    | E | 4.065695508 | 12.80641621 | 288 | 0.337418301 | 4.22E-15    | -21.45712256 | -0.840703503 | 1  |
| DBP  | 4    | R | 0.15131629  | 2.34467702  | 256 | 0.004365809 | 1           | -0.041682511 | -0.215972904 | 0  |
| DBP  | 5    | B | 7.462866925 | 13.75983213 | 207 | 0.096618357 | 0.199263869 | 1.635831573  | 0.280731362  | 0  |
| DBP  | 5    | E | 4.429285237 | 17.54434778 | 207 | 0.354930378 | 6.17E-14    | -21.09353283 | -0.82645783  | 1  |
| DBP  | 5    | R | 1.460951816 | 7.73327671  | 184 | 0.034367008 | 0.999487711 | 1.267953015  | 6.569745552  | 0  |
| DBP  | 10   | B | 2.918507663 | 8.104751531 | 99  | 0.110814023 | 0.317300528 | -2.908527689 | -0.499143649 | 0  |
| DBP  | 10   | E | 2.933851787 | 11.57518749 | 99  | 0.379084967 | 9.21E-10    | -22.58896628 | -0.885049849 | 1  |
| DBP  | 10   | R | 0           | 0           | 88  | 0.007352941 | 1           | -0.192998801 | -1           | 0  |
| DBP  | 20   | B | NA          | NA          | NA  | NA          | NA          | NA           | NA           | NA |
| DBP  | 20   | E | NA          | NA          | NA  | NA          | NA          | NA           | NA           | NA |
| DBP  | 20   | R | NA          | NA          | NA  | NA          | NA          | NA           | NA           | NA |
| DEET | 0    | B | 8.139881354 | 12.81099008 | 315 | 0           | 1           | 0            | 0            | 0  |
| DEET | 0    | E | 18.01814643 | 28.02890321 | 315 | 0           | 1           | 0            | 0            | 0  |
| DEET | 0    | R | 0.375744029 | 3.576583051 | 280 | 0           | 1           | 0            | 0            | 0  |
| DEET | 1    | B | 8.341701959 | 12.94772573 | 306 | 0.03426704  | 0.993253786 | 0.201820604  | 0.024794047  | 0  |
| DEET | 1    | E | 23.65905196 | 32.52809817 | 306 | 0.100560224 | 0.086625421 | 5.640905529  | 0.313068026  | 0  |
| DEET | 1    | R | 7.98E-05    | 0.001315839 | 272 | 0.028466387 | 0.999879054 | -0.375664245 | -0.999787663 | 0  |
| DEET | 2.54 | B | 10.30039007 | 14.59809915 | 324 | 0.091093474 | 0.141155012 | 2.160508718  | 0.26542263   | 0  |
| DEET | 2.54 | E | 23.96978859 | 30.513542   | 324 | 0.117107584 | 0.025030303 | 5.951642157  | 0.330313786  | 0  |
| DEET | 2.54 | R | 0.31708126  | 3.152693065 | 288 | 0.018253968 | 1           | -0.058662769 | -0.156124287 | 0  |
| DEET | 6.45 | B | 8.878421521 | 13.38219787 | 306 | 0.044070962 | 0.923754053 | 0.738540167  | 0.090731073  | 0  |
| DEET | 6.45 | E | 20.15129922 | 28.48313752 | 306 | 0.056022409 | 0.714624691 | 2.13315279   | 0.118389136  | 0  |
| DEET | 6.45 | R | 1.052995856 | 7.296871938 | 272 | 0.018697479 | 1           | 0.677251827  | 1.802428712  | 0  |
| DEET | 16.4 | B | 8.304544063 | 12.50886555 | 297 | 0.042520443 | 0.945076539 | 0.164662709  | 0.020229129  | 0  |
| DEET | 16.4 | E | 20.60199724 | 29.17831587 | 297 | 0.081096681 | 0.267141566 | 2.583850814  | 0.143402698  | 0  |
| DEET | 16.4 | R | 0.293544151 | 4.294571743 | 264 | 0.017424242 | 1           | -0.082199878 | -0.218765627 | 0  |



|      |      |   |             |             |     |             |             |              |              |   |
|------|------|---|-------------|-------------|-----|-------------|-------------|--------------|--------------|---|
| DEET | 35   | B | 7.261525426 | 11.93374437 | 306 | 0.0643324   | 0.541714667 | -0.878355928 | -0.107907707 | 0 |
| DEET | 35   | E | 14.93098116 | 23.22216932 | 306 | 0.066293184 | 0.502600222 | -3.087165265 | -0.171336451 | 0 |
| DEET | 35   | R | 0           | 0           | 272 | 0.032142857 | 0.998842782 | -0.375744029 | -1           | 0 |
| DEET | 74.8 | B | 7.364222625 | 11.07558318 | 297 | 0.050505051 | 0.830360377 | -0.77565873  | -0.095291159 | 0 |
| DEET | 74.8 | E | 11.78502304 | 18.72327118 | 297 | 0.098701299 | 0.101729158 | -6.233123394 | -0.345935883 | 0 |
| DEET | 74.8 | R | 0.29847627  | 3.031761008 | 264 | 0.013203463 | 1           | -0.077267759 | -0.205639354 | 0 |
| DEET | 100  | B | 7.928034355 | 11.78998791 | 315 | 0.044444444 | 0.914797537 | -0.211847    | -0.026025809 | 0 |
| DEET | 100  | E | 8.018628493 | 13.77926173 | 315 | 0.155555556 | 0.000978906 | -9.999517937 | -0.55496929  | 1 |
| DEET | 100  | R | 7.75E-05    | 0.001296905 | 280 | 0.028571429 | 0.999847967 | -0.375666524 | -0.999793729 | 0 |
| DEHP | 0    | B | 4.355020571 | 10.63226359 | 315 | 0           | 1           | 0            | 0            | 0 |
| DEHP | 0    | E | 34.09984119 | 41.62974144 | 315 | 0           | 1           | 0            | 0            | 0 |
| DEHP | 0    | R | 0.538039462 | 4.331106012 | 280 | 0           | 1           | 0            | 0            | 0 |
| DEHP | 1    | B | 5.806946549 | 13.81006683 | 315 | 0.053968254 | 0.748621806 | 1.451925978  | 0.333391302  | 0 |
| DEHP | 1    | E | 34.60269152 | 43.38025555 | 315 | 0.041269841 | 0.951303736 | 0.502850329  | 0.014746413  | 0 |
| DEHP | 1    | R | 0.063708996 | 1.066055398 | 280 | 0.021428571 | 0.999999954 | -0.474330466 | -0.881590478 | 0 |
| DEHP | 3    | B | 6.099497245 | 13.46994801 | 324 | 0.075220459 | 0.326719911 | 1.744476674  | 0.400566805  | 0 |
| DEHP | 3    | E | 27.95956106 | 38.71738292 | 324 | 0.10952381  | 0.043341107 | -6.140280125 | -0.180067704 | 0 |
| DEHP | 3    | R | 0.990050727 | 9.391834695 | 288 | 0.011111111 | 1           | 0.452011265  | 0.840108016  | 0 |
| DEHP | 5    | B | 4.169412521 | 10.87354641 | 324 | 0.02292769  | 0.999996406 | -0.18560805  | -0.042619328 | 0 |
| DEHP | 5    | E | 28.08816119 | 40.79249571 | 324 | 0.1170194   | 0.025195926 | -6.011679994 | -0.176296422 | 0 |
| DEHP | 5    | R | 0.227487733 | 2.76122932  | 288 | 0.014484127 | 1           | -0.310551729 | -0.577191361 | 0 |
| DEHP | 10   | B | 4.88770174  | 12.48722001 | 324 | 0.027601411 | 0.99971608  | 0.532681169  | 0.122314272  | 0 |
| DEHP | 10   | E | 22.90822677 | 33.85965373 | 324 | 0.141798942 | 0.003247903 | -11.19161442 | -0.328201365 | 0 |
| DEHP | 10   | R | 0.386405385 | 4.298444615 | 288 | 0.011111111 | 1           | -0.151634077 | -0.281827054 | 0 |
| DEHP | 20   | B | 5.359263692 | 12.83367449 | 288 | 0.038988095 | 0.976197859 | 1.004243121  | 0.230594346  | 0 |
| DEHP | 20   | E | 31.44538755 | 40.89741883 | 288 | 0.074404762 | 0.375537701 | -2.654453635 | -0.077843578 | 0 |
| DEHP | 20   | R | 0.31984128  | 3.707630802 | 256 | 0.010379464 | 1           | -0.218198182 | -0.405543083 | 0 |
| DEHP | 40   | B | 3.90349397  | 10.85458712 | 315 | 0.034920635 | 0.990716312 | -0.451526601 | -0.103679556 | 0 |
| DEHP | 40   | E | 22.4847743  | 34.92801845 | 315 | 0.161904762 | 0.000518798 | -11.61506689 | -0.340619384 | 0 |
| DEHP | 40   | R | 0.406436058 | 4.511521631 | 280 | 0.007142857 | 1           | -0.131603404 | -0.244598051 | 0 |
| DEHP | 80   | B | 4.34510049  | 11.3935715  | 324 | 0.022839506 | 0.99999678  | -0.009920081 | -0.002277849 | 0 |
| DEHP | 80   | E | 25.44635184 | 36.93956159 | 324 | 0.128130511 | 0.010554735 | -8.653489349 | -0.253769198 | 0 |
| DEHP | 80   | R | 0.385350362 | 3.168043687 | 288 | 0.010714286 | 1           | -0.1526891   | -0.28378792  | 0 |
| DEP  | 0    | B | 6.224893924 | 11.70942577 | 306 | 0           | 1           | 0            | 0            | 0 |
| DEP  | 0    | E | 6.52545242  | 13.19231784 | 306 | 0           | 1           | 0            | 0            | 0 |
| DEP  | 0    | R | 1.01733185  | 5.812123317 | 272 | 0           | 1           | 0            | 0            | 0 |
| DEP  | 1    | B | 8.331658313 | 13.88786414 | 324 | 0.075889615 | 0.325026439 | 2.106764388  | 0.338441813  | 0 |
| DEP  | 1    | E | 9.849818643 | 19.42377252 | 324 | 0.074074074 | 0.35364751  | 3.324366223  | 0.50944609   | 0 |
| DEP  | 1    | R | 0.959533173 | 4.979614878 | 288 | 0.017361111 | 1           | -0.057798677 | -0.056813986 | 0 |
| DEP  | 2.54 | B | 10.42872372 | 16.30062656 | 324 | 0.125090777 | 0.014525409 | 4.203829793  | 0.675325531  | 0 |



|      |      |   |             |             |     |             |             |              |              |   |
|------|------|---|-------------|-------------|-----|-------------|-------------|--------------|--------------|---|
| DEP  | 2.54 | E | 17.33505458 | 26.17535746 | 324 | 0.21151053  | 1.53E-06    | 10.80960216  | 1.656529151  | 1 |
| DEP  | 2.54 | R | 1.336444168 | 7.417222008 | 288 | 0.013684641 | 1           | 0.319112318  | 0.313675737  | 0 |
| DEP  | 6.45 | B | 10.59135042 | 16.80205421 | 324 | 0.120733479 | 0.020348948 | 4.366456492  | 0.701450747  | 0 |
| DEP  | 6.45 | E | 21.26568658 | 31.35960879 | 324 | 0.219135802 | 5.46E-07    | 14.74023416  | 2.258883096  | 1 |
| DEP  | 6.45 | R | 1.134123627 | 9.868030742 | 288 | 0.016135621 | 1           | 0.116791777  | 0.114802046  | 0 |
| DEP  | 16.4 | B | 10.2919502  | 17.68468294 | 324 | 0.110021786 | 0.044300426 | 4.067056278  | 0.653353507  | 0 |
| DEP  | 16.4 | E | 27.31039454 | 40.87611438 | 324 | 0.293028322 | 3.66E-12    | 20.78494212  | 3.185210892  | 1 |
| DEP  | 16.4 | R | 0.662419877 | 4.627181596 | 288 | 0.027777778 | 0.999917096 | -0.354911973 | -0.348865489 | 0 |
| DEP  | 35   | B | 10.67329445 | 16.24575279 | 315 | 0.127917834 | 0.012444347 | 4.448400527  | 0.714614672  | 0 |
| DEP  | 35   | E | 25.09913808 | 35.88724178 | 315 | 0.255555556 | 3.13E-09    | 18.57368566  | 2.846344508  | 1 |
| DEP  | 35   | R | 0.727694217 | 8.006935028 | 280 | 0.0375      | 0.990144618 | -0.289637633 | -0.284703199 | 0 |
| DEP  | 74.8 | B | 8.7954694   | 14.83346867 | 315 | 0.099439776 | 0.092864336 | 2.570575475  | 0.412950888  | 0 |
| DEP  | 74.8 | E | 26.69477337 | 39.90361491 | 315 | 0.249112979 | 8.60E-09    | 20.16932095  | 3.09086936   | 1 |
| DEP  | 74.8 | R | 0.313584788 | 2.9507604   | 280 | 0.041071429 | 0.974085465 | -0.703747062 | -0.691757623 | 0 |
| DEP  | 100  | B | 7.281820651 | 13.9253103  | 324 | 0.06063907  | 0.609180227 | 1.056926726  | 0.169790319  | 0 |
| DEP  | 100  | E | 26.04816546 | 38.76652632 | 324 | 0.268518519 | 2.79E-10    | 19.52271304  | 2.991779234  | 1 |
| DEP  | 100  | R | 0.620297786 | 5.952656171 | 288 | 0.03125     | 0.9991886   | -0.397034064 | -0.390269964 | 0 |
| DIBP | 0    | B | 7.489457405 | 15.58252074 | 324 | 0           | 1           | 0            | 0            | 0 |
| DIBP | 0    | E | 17.66473102 | 29.87175984 | 324 | 0           | 1           | 0            | 0            | 0 |
| DIBP | 0    | R | 0.613214852 | 5.343170033 | 288 | 0           | 1           | 0            | 0            | 0 |
| DIBP | 2    | B | 6.366429713 | 13.8790918  | 315 | 0.042945326 | 0.929918724 | -1.123027692 | -0.149947804 | 0 |
| DIBP | 2    | E | 6.40459622  | 16.10499269 | 315 | 0.216666667 | 6.14E-07    | -11.2601348  | -0.637435961 | 1 |
| DIBP | 2    | R | 0.529203837 | 4.533406675 | 280 | 0.014781746 | 1           | -0.084011015 | -0.137000946 | 0 |
| DIBP | 4    | B | 6.499393651 | 14.80101248 | 315 | 0.046119929 | 0.886128892 | -0.990063754 | -0.132194323 | 0 |
| DIBP | 4    | E | 3.763020757 | 11.84310781 | 315 | 0.276984127 | 4.55E-11    | -13.90171027 | -0.786975485 | 1 |
| DIBP | 4    | R | 0.346137164 | 4.392596533 | 280 | 0.006845238 | 1           | -0.267077688 | -0.435536887 | 0 |
| DIBP | 5    | B | 5.417900412 | 12.4363934  | 306 | 0.06989833  | 0.425463317 | -2.071556994 | -0.276596405 | 0 |
| DIBP | 5    | E | 2.705723453 | 8.865906707 | 306 | 0.289215686 | 7.37E-12    | -14.95900757 | -0.84682906  | 1 |
| DIBP | 5    | R | 1.211448024 | 6.712639275 | 272 | 0.05249183  | 0.835547834 | 0.598233172  | 0.975568629  | 0 |
| DIBP | 6    | B | 5.633749437 | 12.56281095 | 315 | 0.069400353 | 0.425143955 | -1.855707968 | -0.247776023 | 0 |
| DIBP | 6    | E | 1.860807517 | 7.859836597 | 315 | 0.334126984 | 6.66E-16    | -15.80392351 | -0.894659731 | 1 |
| DIBP | 6    | R | 0.861390271 | 5.129402437 | 280 | 0.039781746 | 0.978189912 | 0.248175419  | 0.404712017  | 0 |
| DIBP | 8    | B | 5.575372853 | 12.75371305 | 288 | 0.065972222 | 0.520552213 | -1.914084553 | -0.255570524 | 0 |
| DIBP | 8    | E | 1.778609676 | 7.027123192 | 288 | 0.326388889 | 1.55E-14    | -15.88612135 | -0.899312949 | 1 |
| DIBP | 8    | R | 0.3612093   | 2.839406096 | 256 | 0.010416667 | 1           | -0.252005552 | -0.410958005 | 0 |
| DIBP | 10   | B | 6.546499226 | 14.34976872 | 252 | 0.049382716 | 0.879831288 | -0.94295818  | -0.125904739 | 0 |
| DIBP | 10   | E | 2.073946827 | 9.187858299 | 252 | 0.337301587 | 1.97E-14    | -15.5907842  | -0.88259392  | 1 |
| DIBP | 10   | R | 1.157633596 | 6.329110891 | 224 | 0.030753968 | 0.99976823  | 0.544418745  | 0.887810762  | 0 |
| DIBP | 15   | B | 2.49847303  | 8.909872439 | 162 | 0.145061728 | 0.021234639 | -4.990984375 | -0.66640133  | 0 |
| DIBP | 15   | E | 1.126194842 | 6.089401696 | 162 | 0.342592593 | 1.95E-11    | -16.53853618 | -0.936246137 | 1 |



|         |     |   |             |             |     |             |             |              |              |   |
|---------|-----|---|-------------|-------------|-----|-------------|-------------|--------------|--------------|---|
| DIBP    | 15  | R | 0.275637823 | 2.434819699 | 144 | 0.013888889 | 1           | -0.337577028 | -0.550503673 | 0 |
| DNP     | 0   | B | 6.954625356 | 16.65737162 | 324 | 0           | 1           | 0            | 0            | 0 |
| DNP     | 0   | E | 31.05575954 | 46.98938901 | 324 | 0           | 1           | 0            | 0            | 0 |
| DNP     | 0   | R | 1.294623449 | 8.546829333 | 288 | 0           | 1           | 0            | 0            | 0 |
| DNP     | 2   | B | 6.784764715 | 14.76568337 | 324 | 0.024691358 | 0.999970014 | -0.169860641 | -0.024424125 | 0 |
| DNP     | 2   | E | 34.19482487 | 49.88465637 | 324 | 0.067901235 | 0.443946011 | 3.139065325  | 0.101078363  | 0 |
| DNP     | 2   | R | 0.581718055 | 5.112207658 | 288 | 0.020833333 | 0.999999973 | -0.712905394 | -0.550666215 | 0 |
| DNP     | 10  | B | 7.820215968 | 17.73733267 | 315 | 0.041446208 | 0.946657439 | 0.865590613  | 0.12446258   | 0 |
| DNP     | 10  | E | 25.88369477 | 40.69274991 | 315 | 0.060934744 | 0.593475565 | -5.172064769 | -0.166541242 | 0 |
| DNP     | 10  | R | 0.225306989 | 3.081891369 | 280 | 0.03452381  | 0.995845176 | -1.06931646  | -0.825967165 | 0 |
| DNP     | 30  | B | 8.518799156 | 18.70310647 | 324 | 0.058641975 | 0.633246263 | 1.5641738    | 0.224911296  | 0 |
| DNP     | 30  | E | 34.31485372 | 49.49436726 | 324 | 0.067901235 | 0.443946011 | 3.259094179  | 0.104943309  | 0 |
| DNP     | 30  | R | 0.70175362  | 5.612251495 | 288 | 0.020833333 | 0.999999973 | -0.592869829 | -0.457947698 | 0 |
| DNP     | 50  | B | 6.591127448 | 15.08274537 | 324 | 0.027777778 | 0.999633292 | -0.363497907 | -0.052267072 | 0 |
| DNP     | 50  | E | 31.00873889 | 47.85589085 | 324 | 0.033950617 | 0.992163294 | -0.047020651 | -0.001514072 | 0 |
| DNP     | 50  | R | 0.476526413 | 3.877282105 | 288 | 0.020833333 | 0.999999973 | -0.818097036 | -0.631918908 | 0 |
| DNP     | 70  | B | 8.044670629 | 16.59843992 | 315 | 0.054144621 | 0.7372234   | 1.090045274  | 0.156736735  | 0 |
| DNP     | 70  | E | 29.1116895  | 43.51693211 | 315 | 0.033597884 | 0.993700176 | -1.944070047 | -0.06259934  | 0 |
| DNP     | 70  | R | 0.010308156 | 0.169895199 | 280 | 0.041369048 | 0.968293406 | -1.284315293 | -0.992037719 | 0 |
| DNP     | 80  | B | 6.127921323 | 14.80314582 | 315 | 0.041446208 | 0.946657439 | -0.826704032 | -0.118871109 | 0 |
| DNP     | 80  | E | 30.99109926 | 46.47630107 | 315 | 0.035097002 | 0.989313919 | -0.064660278 | -0.00208207  | 0 |
| DNP     | 80  | R | 1.125759231 | 8.296385409 | 280 | 0.016865079 | 1           | -0.168864218 | -0.130435007 | 0 |
| DNP     | 100 | B | 6.287615451 | 14.0447598  | 315 | 0.030599647 | 0.998305551 | -0.667009904 | -0.095908819 | 0 |
| DNP     | 100 | E | 25.26730515 | 41.91318835 | 315 | 0.07037037  | 0.40762035  | -5.78845439  | -0.186389078 | 0 |
| DNP     | 100 | R | 0.418526728 | 4.783644842 | 280 | 0.037797619 | 0.987295749 | -0.876096721 | -0.676719336 | 0 |
| G14 Mix | 0   | B | 6.058530694 | 15.69890937 | 288 | 0           | 1           | 0            | 0            | 0 |
| G14 Mix | 0   | E | 25.00783551 | 42.93051055 | 288 | 0           | 1           | 0            | 0            | 0 |
| G14 Mix | 0   | R | 1.010131944 | 7.462326778 | 256 | 0           | 1           | 0            | 0            | 0 |
| G14 Mix | 28  | B | 3.38998145  | 10.01453143 | 252 | 0.060515873 | 0.708625586 | -2.668549244 | -0.440461455 | 0 |
| G14 Mix | 28  | E | 1.630618156 | 7.745938403 | 252 | 0.314484127 | 5.70E-12    | -23.37721735 | -0.93479571  | 1 |
| G14 Mix | 28  | R | 1.306152313 | 6.328319453 | 224 | 0.044642857 | 0.971133153 | 0.296020369  | 0.293051191  | 0 |
| G14 Mix | 56  | B | 0.170810873 | 2.029364426 | 279 | 0.207997312 | 9.46E-06    | -5.887719821 | -0.971806552 | 1 |
| G14 Mix | 56  | E | 0.127563693 | 1.685642989 | 279 | 0.374775986 | 0           | -24.88027181 | -0.994899051 | 1 |
| G14 Mix | 56  | R | 0.000700044 | 0.003842055 | 248 | 0.03125     | 0.999684746 | -1.0094319   | -0.999306977 | 0 |
| G14 Mix | 63  | B | 0.000629025 | 0.003649574 | 207 | 0.21875     | 1.97E-05    | -6.057901669 | -0.999896175 | 1 |
| G14 Mix | 63  | E | 0.0008387   | 0.004193146 | 207 | 0.381944444 | 1.11E-15    | -25.00699681 | -0.999966462 | 1 |
| G14 Mix | 63  | R | 0.000825596 | 0.004162828 | 184 | 0.03125     | 0.999941857 | -1.009306348 | -0.999182685 | 0 |
| G14 Mix | 70  | B | 0.064522082 | 0.612272011 | 261 | 0.207255747 | 1.56E-05    | -5.994008612 | -0.98935021  | 1 |
| G14 Mix | 70  | E | 0.000415735 | 0.002980474 | 261 | 0.381944444 | 0           | -25.00741977 | -0.999983376 | 1 |
| G14 Mix | 70  | R | 0.001590187 | 0.008773331 | 232 | 0.03125     | 0.999774283 | -1.008541757 | -0.998425763 | 0 |



|         |     |   |             |             |     |             |             |              |              |    |
|---------|-----|---|-------------|-------------|-----|-------------|-------------|--------------|--------------|----|
| G14 Mix | 77  | B | 0.000344466 | 0.002717728 | 252 | 0.21875     | 5.19E-06    | -6.058186228 | -0.999943144 | 1  |
| G14 Mix | 77  | E | 0.032638205 | 0.507149727 | 252 | 0.37797619  | 0           | -24.9751973  | -0.998694881 | 1  |
| G14 Mix | 77  | R | 0.000193762 | 0.002045984 | 224 | 0.045758929 | 0.963850002 | -1.009938182 | -0.999808181 | 0  |
| G14 Mix | 84  | B | 0.000209675 | 0.002127945 | 207 | 0.219504831 | 1.82E-05    | -6.058321019 | -0.999965392 | 1  |
| G14 Mix | 84  | E | 0.00041935  | 0.002994653 | 207 | 0.381944444 | 1.11E-15    | -25.00741616 | -0.999983231 | 1  |
| G14 Mix | 84  | R | 0.000353827 | 0.002755832 | 184 | 0.038383152 | 0.9974704   | -1.009778117 | -0.999649722 | 0  |
| G14 Mix | 112 | B | NA          | NA          | NA  | NA          | NA          | NA           | NA           | NA |
| G14 Mix | 112 | E | NA          | NA          | NA  | NA          | NA          | NA           | NA           | NA |
| G14 Mix | 112 | R | NA          | NA          | NA  | NA          | NA          | NA           | NA           | NA |
| HHCb    | 0   | B | 4.387297772 | 12.29367037 | 324 | 0           | 1           | 0            | 0            | 0  |
| HHCb    | 0   | E | 26.93483813 | 42.39769681 | 324 | 0           | 1           | 0            | 0            | 0  |
| HHCb    | 0   | R | 0.273151258 | 2.814478057 | 288 | 0           | 1           | 0            | 0            | 0  |
| HHCb    | 10  | B | 3.024262884 | 8.896521235 | 324 | 0.049382716 | 0.824393461 | -1.363034888 | -0.310677542 | 0  |
| HHCb    | 10  | E | 0.883929859 | 6.522039638 | 324 | 0.419753086 | 0           | -26.05090827 | -0.967182656 | 1  |
| HHCb    | 10  | R | 0.332830036 | 2.945740482 | 288 | 0.006944444 | 1           | 0.059678778  | 0.218482531  | 0  |
| HHCb    | 14  | B | 0.264100521 | 2.280949652 | 324 | 0.138888889 | 0.003860908 | -4.123197251 | -0.939803374 | 1  |
| HHCb    | 14  | E | 0.200000958 | 1.730769507 | 324 | 0.447530864 | 0           | -26.73483717 | -0.992574637 | 1  |
| HHCb    | 14  | R | 7.54E-05    | 0.001278766 | 288 | 0.013888889 | 1           | -0.273075906 | -0.999724138 | 0  |
| HHCb    | 16  | B | 0.01011392  | 0.126670071 | 324 | 0.163580247 | 0.000343403 | -4.377183852 | -0.997694727 | 1  |
| HHCb    | 16  | E | 6.70E-05    | 0.001205632 | 324 | 0.472222222 | 0           | -26.93477115 | -0.999997513 | 1  |
| HHCb    | 16  | R | 0           | 0           | 288 | 0.013888889 | 1           | -0.273151258 | -1           | 0  |
| HHCb    | 20  | B | 0           | 0           | 306 | 0.172839506 | 0.00016504  | -4.387297772 | -1           | 1  |
| HHCb    | 20  | E | 0           | 0           | 306 | 0.475308642 | 0           | -26.93483813 | -1           | 1  |
| HHCb    | 20  | R | 0.004866857 | 0.078956534 | 272 | 0.013888889 | 1           | -0.268284401 | -0.982182557 | 0  |
| HHCb    | 24  | B | 6.70E-05    | 0.001205632 | 324 | 0.172839506 | 0.000125167 | -4.387230793 | -0.999984733 | 1  |
| HHCb    | 24  | E | 0.000133959 | 0.00170238  | 324 | 0.472222222 | 0           | -26.93470417 | -0.999995027 | 1  |
| HHCb    | 24  | R | 0           | 0           | 288 | 0.013888889 | 1           | -0.273151258 | -1           | 0  |
| HHCb    | 28  | B | 6.70E-05    | 0.001205632 | 324 | 0.172839506 | 0.000125167 | -4.387230793 | -0.999984733 | 1  |
| HHCb    | 28  | E | 6.70E-05    | 0.001205632 | 324 | 0.472222222 | 0           | -26.93477115 | -0.999997513 | 1  |
| HHCb    | 28  | R | 0           | 0           | 288 | 0.013888889 | 1           | -0.273151258 | -1           | 0  |
| HHCb    | 32  | B | 0           | 0           | 315 | 0.172839506 | 0.000143448 | -4.387297772 | -1           | 1  |
| HHCb    | 32  | E | 6.89E-05    | 0.001222734 | 315 | 0.472222222 | 0           | -26.93476924 | -0.999997442 | 1  |
| HHCb    | 32  | R | 0           | 0           | 280 | 0.013888889 | 1           | -0.273151258 | -1           | 0  |
| Lilial  | 0   | B | 2.559523743 | 10.18210875 | 315 | 0           | 1           | 0            | 0            | 0  |
| Lilial  | 0   | E | 27.15112334 | 44.48747661 | 315 | 0           | 1           | 0            | 0            | 0  |
| Lilial  | 0   | R | 0.02968439  | 0.366707095 | 280 | 0           | 1           | 0            | 0            | 0  |
| Lilial  | 20  | B | 4.548542642 | 11.72792821 | 315 | 0.082539683 | 0.233520535 | 1.989018899  | 0.777105079  | 0  |
| Lilial  | 20  | E | 20.70684602 | 36.63073681 | 315 | 0.073015873 | 0.370570972 | -6.444277319 | -0.23734846  | 0  |
| Lilial  | 20  | R | 0.982452824 | 5.389768451 | 280 | 0.039285714 | 0.982130802 | 0.952768435  | 32.09661545  | 0  |
| Lilial  | 40  | B | 4.344755571 | 11.31260253 | 315 | 0.111111111 | 0.0409358   | 1.785231829  | 0.697485942  | 0  |



|        |     |   |             |             |     |             |             |              |              |   |
|--------|-----|---|-------------|-------------|-----|-------------|-------------|--------------|--------------|---|
| Lilial | 40  | E | 12.96936934 | 28.18122428 | 315 | 0.161904762 | 0.000518798 | -14.181754   | -0.522326602 | 1 |
| Lilial | 40  | R | 0.402948397 | 4.757717118 | 280 | 0.010714286 | 1           | 0.373264008  | 12.57442089  | 0 |
| Lilial | 60  | B | 4.160948609 | 11.89671587 | 315 | 0.095238095 | 0.114843478 | 1.601424866  | 0.625672987  | 0 |
| Lilial | 60  | E | 5.998057871 | 15.95591027 | 315 | 0.250793651 | 4.97E-09    | -21.15306547 | -0.779086199 | 1 |
| Lilial | 60  | R | 1.274259121 | 7.531775314 | 280 | 0.046428571 | 0.923467842 | 1.244574732  | 41.92691015  | 0 |
| Lilial | 70  | B | 3.473186583 | 9.310588353 | 315 | 0.104761905 | 0.063037405 | 0.91366284   | 0.356965956  | 0 |
| Lilial | 70  | E | 3.607321846 | 9.832932985 | 315 | 0.273015873 | 1.27E-10    | -23.54380149 | -0.867139131 | 1 |
| Lilial | 70  | R | 1.004774365 | 5.445219293 | 280 | 0.039285714 | 0.982130802 | 0.975089976  | 32.84857771  | 0 |
| Lilial | 80  | B | 2.913277413 | 8.411562491 | 324 | 0.099029982 | 0.087193051 | 0.353753671  | 0.13821074   | 0 |
| Lilial | 80  | E | 4.788840542 | 14.20304921 | 324 | 0.25952381  | 9.06E-10    | -22.3622828  | -0.823622747 | 1 |
| Lilial | 80  | R | 1.152434243 | 5.605601028 | 288 | 0.058829365 | 0.709631041 | 1.122749853  | 37.82290529  | 0 |
| Lilial | 90  | B | 2.290300273 | 7.076234316 | 324 | 0.071252205 | 0.392066906 | -0.26922347  | -0.105184986 | 0 |
| Lilial | 90  | E | 2.660295357 | 8.444498455 | 324 | 0.324867725 | 4.55E-15    | -24.49082798 | -0.902018958 | 1 |
| Lilial | 90  | R | 1.698284127 | 6.984016489 | 288 | 0.083134921 | 0.280277991 | 1.668599738  | 56.21135437  | 0 |
| Lilial | 100 | B | 2.717013693 | 8.074467319 | 315 | 0.104761905 | 0.063037405 | 0.15748995   | 0.061530959  | 0 |
| Lilial | 100 | E | 2.166074055 | 6.889490159 | 315 | 0.333333333 | 1.22E-15    | -24.98504928 | -0.920221568 | 1 |
| Lilial | 100 | R | 0.827055379 | 4.085338355 | 280 | 0.042857143 | 0.959226548 | 0.797370989  | 26.86162667  | 0 |
| TPP    | 0   | B | 5.557163508 | 14.25877092 | 324 | 0           | 1           | 0            | 0            | 0 |
| TPP    | 0   | E | 28.64435944 | 42.17088029 | 324 | 0           | 1           | 0            | 0            | 0 |
| TPP    | 0   | R | 0.221911817 | 1.801217925 | 288 | 0           | 1           | 0            | 0            | 0 |
| TPP    | 2   | B | 6.37324226  | 14.90097536 | 324 | 0.070987654 | 0.387885061 | 0.816078752  | 0.146851672  | 0 |
| TPP    | 2   | E | 11.25813135 | 23.44326928 | 324 | 0.188271605 | 2.06E-05    | -17.38622808 | -0.606968647 | 1 |
| TPP    | 2   | R | 1.550971522 | 7.832007799 | 288 | 0.045138889 | 0.930938569 | 1.329059706  | 5.989134443  | 0 |
| TPP    | 3   | B | 5.881410996 | 14.19891814 | 324 | 0.040123457 | 0.956694152 | 0.324247488  | 0.05834766   | 0 |
| TPP    | 3   | E | 7.714106539 | 19.45113243 | 324 | 0.268518519 | 1.43E-10    | -20.9302529  | -0.730693697 | 1 |
| TPP    | 3   | R | 2.116488123 | 8.052692597 | 288 | 0.076388889 | 0.370138738 | 1.894576306  | 8.537518791  | 0 |
| TPP    | 4   | B | 5.695676468 | 15.77091854 | 324 | 0.024691358 | 0.999970014 | 0.13851296   | 0.024925119  | 0 |
| TPP    | 4   | E | 6.752882695 | 17.26979551 | 324 | 0.287037037 | 5.10E-12    | -21.89147674 | -0.764250874 | 1 |
| TPP    | 4   | R | 1.195761715 | 6.137194895 | 288 | 0.041666667 | 0.963945244 | 0.973849898  | 4.388454441  | 0 |
| TPP    | 5   | B | 5.827157765 | 14.16196656 | 324 | 0.027777778 | 0.999633292 | 0.269994257  | 0.048584904  | 0 |
| TPP    | 5   | E | 5.826287334 | 14.56634161 | 324 | 0.283950617 | 9.03E-12    | -22.8180721  | -0.79659914  | 1 |
| TPP    | 5   | R | 2.091320816 | 8.15236693  | 288 | 0.069444444 | 0.490980372 | 1.869408999  | 8.424107492  | 0 |
| TPP    | 6   | B | 4.192552173 | 10.94426153 | 306 | 0.062636166 | 0.567480787 | -1.364611336 | -0.245558968 | 0 |
| TPP    | 6   | E | 4.565731119 | 11.49571351 | 306 | 0.288307916 | 8.69E-12    | -24.07862832 | -0.840606276 | 1 |
| TPP    | 6   | R | 1.812784037 | 7.211206103 | 272 | 0.085784314 | 0.254677768 | 1.59087222   | 7.168938738  | 0 |
| TPP    | 8   | B | 2.003619516 | 8.306831067 | 306 | 0.099854757 | 0.086706478 | -3.553543993 | -0.639452841 | 0 |
| TPP    | 8   | E | 1.922629743 | 8.900912404 | 306 | 0.391067538 | 0           | -26.72172969 | -0.93287929  | 1 |
| TPP    | 8   | R | 0.291133808 | 1.817753011 | 272 | 0.030637255 | 0.999425379 | 0.069221991  | 0.311934678  | 0 |
| TPP    | 10  | B | 0.247809214 | 1.932511738 | 315 | 0.150352734 | 0.001461899 | -5.309354294 | -0.955407248 | 1 |
| TPP    | 10  | E | 0.330963402 | 3.00714304  | 315 | 0.452733686 | 0           | -28.31339603 | -0.988445774 | 1 |



|             |       |   |             |             |     |             |             |              |              |   |
|-------------|-------|---|-------------|-------------|-----|-------------|-------------|--------------|--------------|---|
| TPP         | 10    | R | 0.231739994 | 3.616285063 | 280 | 0.013789683 | 1           | 0.009828177  | 0.044288661  | 0 |
| ZF BMC Mix  | 0     | B | 3.851929134 | 11.90212155 | 324 | 0.043992349 | 0.699104976 | 0            | 0            | 0 |
| ZF BMC Mix  | 0     | E | 21.0463946  | 40.46656245 | 324 | 0.041644931 | 0.761176238 | 0            | 0            | 0 |
| ZF BMC Mix  | 0     | R | 0.364251947 | 3.60993859  | 288 | 0.007286776 | 1           | 0            | 0            | 0 |
| ZF BMC Mix  | 0.511 | B | 5.395541499 | 14.17186479 | 324 | 0.01551904  | 0.999999975 | 1.543612365  | 0.400737478  | 0 |
| ZF BMC Mix  | 0.511 | E | 27.50778375 | 44.34278232 | 324 | 0.113980177 | 0.002423073 | 6.46138915   | 0.307006937  | 0 |
| ZF BMC Mix  | 0.511 | R | 0.441562766 | 4.362423954 | 288 | 0.006602113 | 1           | 0.077310819  | 0.212245452  | 0 |
| ZF BMC Mix  | 1.02  | B | 5.637605279 | 15.74378088 | 324 | 0.017170927 | 0.999999154 | 1.785676144  | 0.463579698  | 0 |
| ZF BMC Mix  | 1.02  | E | 17.28388291 | 35.71031509 | 324 | 0.016431925 | 0.9999998   | -3.762511695 | -0.178772268 | 0 |
| ZF BMC Mix  | 1.02  | R | 0.733401342 | 6.457360655 | 288 | 0.010758998 | 1           | 0.369149395  | 1.013445222  | 0 |
| ZF BMC Mix  | 2.041 | B | 6.132060127 | 15.65624875 | 306 | 0.034014545 | 0.937560659 | 2.280130993  | 0.591945208  | 0 |
| ZF BMC Mix  | 2.041 | E | 6.524600862 | 18.45312818 | 306 | 0.134539262 | 0.000262689 | -14.52179374 | -0.689989617 | 1 |
| ZF BMC Mix  | 2.041 | R | 0.349855131 | 3.34696133  | 272 | 0.012116819 | 1           | -0.014396816 | -0.039524334 | 0 |
| ZF BMC Mix  | 4.08  | B | 5.8300391   | 15.76952618 | 324 | 0.022517823 | 0.999434807 | 1.978109965  | 0.513537476  | 0 |
| ZF BMC Mix  | 4.08  | E | 4.139807835 | 13.70227147 | 324 | 0.207529125 | 4.28E-10    | -16.90658677 | -0.803300854 | 1 |
| ZF BMC Mix  | 4.08  | R | 1.024034415 | 8.176518008 | 288 | 0.010416667 | 1           | 0.659782468  | 1.811335459  | 0 |
| ZF BMC Mix  | 6.13  | B | 4.061465899 | 11.91042203 | 315 | 0.028839705 | 0.984558601 | 0.209536764  | 0.054397876  | 0 |
| ZF BMC Mix  | 6.13  | E | 3.061549481 | 10.42933712 | 315 | 0.200827185 | 2.81E-09    | -17.98484512 | -0.854533304 | 1 |
| ZF BMC Mix  | 6.13  | R | 0.694521736 | 4.399647832 | 280 | 0.027892354 | 0.994847474 | 0.330269789  | 0.906706996  | 0 |
| ZF BMC Mix  | 8.16  | B | 5.750794927 | 15.09252687 | 297 | 0.023924693 | 0.999118742 | 1.898865793  | 0.492964882  | 0 |
| ZF BMC Mix  | 8.16  | E | 3.181628374 | 12.26402413 | 297 | 0.212832551 | 6.59E-10    | -17.86476623 | -0.848827867 | 1 |
| ZF BMC Mix  | 8.16  | R | 1.798585003 | 10.16035708 | 264 | 0.037798762 | 0.919537365 | 1.434333056  | 3.937749867  | 0 |
| ZF BMC Mix  | 10.2  | B | 3.770254698 | 12.67555672 | 270 | 0.060198226 | 0.394442943 | -0.081674436 | -0.021203515 | 0 |
| ZF BMC Mix  | 10.2  | E | 1.952642724 | 9.486176482 | 270 | 0.262702139 | 8.69E-14    | -19.09375188 | -0.907221985 | 1 |
| ZF BMC Mix  | 10.2  | R | 0.75900613  | 5.830946654 | 240 | 0.009389671 | 1           | 0.394754183  | 1.08373939   | 0 |
| ZF Equi-Mix | 0     | B | 3.756963935 | 11.99657045 | 306 | 0.048688074 | 0.716072931 | 0            | 0            | 0 |
| ZF Equi-Mix | 0     | E | 27.04234137 | 49.84618571 | 306 | 0.082883395 | 0.119613097 | 0            | 0            | 0 |
| ZF Equi-Mix | 0     | R | 0.644818384 | 6.796971819 | 272 | 0.034153879 | 0.983609603 | 0            | 0            | 0 |
| ZF Equi-Mix | 1.5   | B | 7.819801861 | 18.13592684 | 315 | 0.047296986 | 0.738090926 | 4.062837926  | 1.081415205  | 0 |
| ZF Equi-Mix | 1.5   | E | 9.862626447 | 24.10238216 | 315 | 0.080515298 | 0.133081017 | -17.17971492 | -0.635289478 | 0 |
| ZF Equi-Mix | 1.5   | R | 2.734142259 | 11.68984201 | 280 | 0.033178054 | 0.98670622  | 2.089323875  | 3.240174173  | 0 |
| ZF Equi-Mix | 3     | B | 6.308004211 | 16.34828265 | 324 | 0.026301664 | 0.998495687 | 2.551040276  | 0.67901644   | 0 |
| ZF Equi-Mix | 3     | E | 7.464742196 | 20.57570634 | 324 | 0.111379495 | 0.010158715 | -19.57759917 | -0.723960951 | 0 |
| ZF Equi-Mix | 3     | R | 2.290551424 | 11.16003997 | 288 | 0.027626812 | 0.998711653 | 1.64573304   | 2.55224274   | 0 |
| ZF Equi-Mix | 3.6   | B | 7.509149541 | 18.7198071  | 324 | 0.032742888 | 0.976414647 | 3.752185606  | 0.998728141  | 0 |
| ZF Equi-Mix | 3.6   | E | 7.778943898 | 19.56035578 | 324 | 0.106011809 | 0.016696948 | -19.26339747 | -0.712342072 | 0 |
| ZF Equi-Mix | 3.6   | R | 2.536651233 | 12.18459298 | 288 | 0.034269324 | 0.979344898 | 1.891832849  | 2.933900297  | 0 |
| ZF Equi-Mix | 4.2   | B | 6.663398179 | 17.55174606 | 324 | 0.025630703 | 0.999010047 | 2.906434244  | 0.773612495  | 0 |
| ZF Equi-Mix | 4.2   | E | 6.451542062 | 17.31071545 | 324 | 0.125603865 | 0.002417877 | -20.5907993  | -0.761428126 | 1 |
| ZF Equi-Mix | 4.2   | R | 3.191309868 | 11.69697069 | 288 | 0.053894928 | 0.641596766 | 2.546491484  | 3.949160797  | 0 |



|             |     |   |             |             |     |             |             |              |              |   |
|-------------|-----|---|-------------|-------------|-----|-------------|-------------|--------------|--------------|---|
| ZF Equi-Mix | 5.1 | B | 6.444004154 | 17.95542182 | 315 | 0.035656775 | 0.953177736 | 2.687040219  | 0.715215867  | 0 |
| ZF Equi-Mix | 5.1 | E | 6.704489512 | 17.85796532 | 315 | 0.115343915 | 0.007690569 | -20.33785185 | -0.75207437  | 1 |
| ZF Equi-Mix | 5.1 | R | 2.865125826 | 10.43163115 | 280 | 0.052898551 | 0.67606478  | 2.220307442  | 3.443306668  | 0 |
| ZF Equi-Mix | 6   | B | 4.199666737 | 14.59895158 | 315 | 0.069289165 | 0.268204439 | 0.442702802  | 0.117835255  | 0 |
| ZF Equi-Mix | 6   | E | 3.817998058 | 13.75469725 | 315 | 0.186979526 | 9.01E-07    | -23.22434331 | -0.858814072 | 1 |
| ZF Equi-Mix | 6   | R | 1.094447339 | 7.085309108 | 280 | 0.018426501 | 0.999999968 | 0.449628955  | 0.697295495  | 0 |
| ZF Equi-Mix | 7.5 | B | 4.095533888 | 14.27988813 | 306 | 0.06299138  | 0.390146272 | 0.338569953  | 0.090117967  | 0 |
| ZF Equi-Mix | 7.5 | E | 4.38467326  | 14.02419189 | 306 | 0.160935872 | 4.89E-05    | -22.65766811 | -0.837858963 | 1 |
| ZF Equi-Mix | 7.5 | R | 2.248726883 | 10.7670485  | 272 | 0.028239557 | 0.998648754 | 1.603908498  | 2.487380226  | 0 |



# AHTN

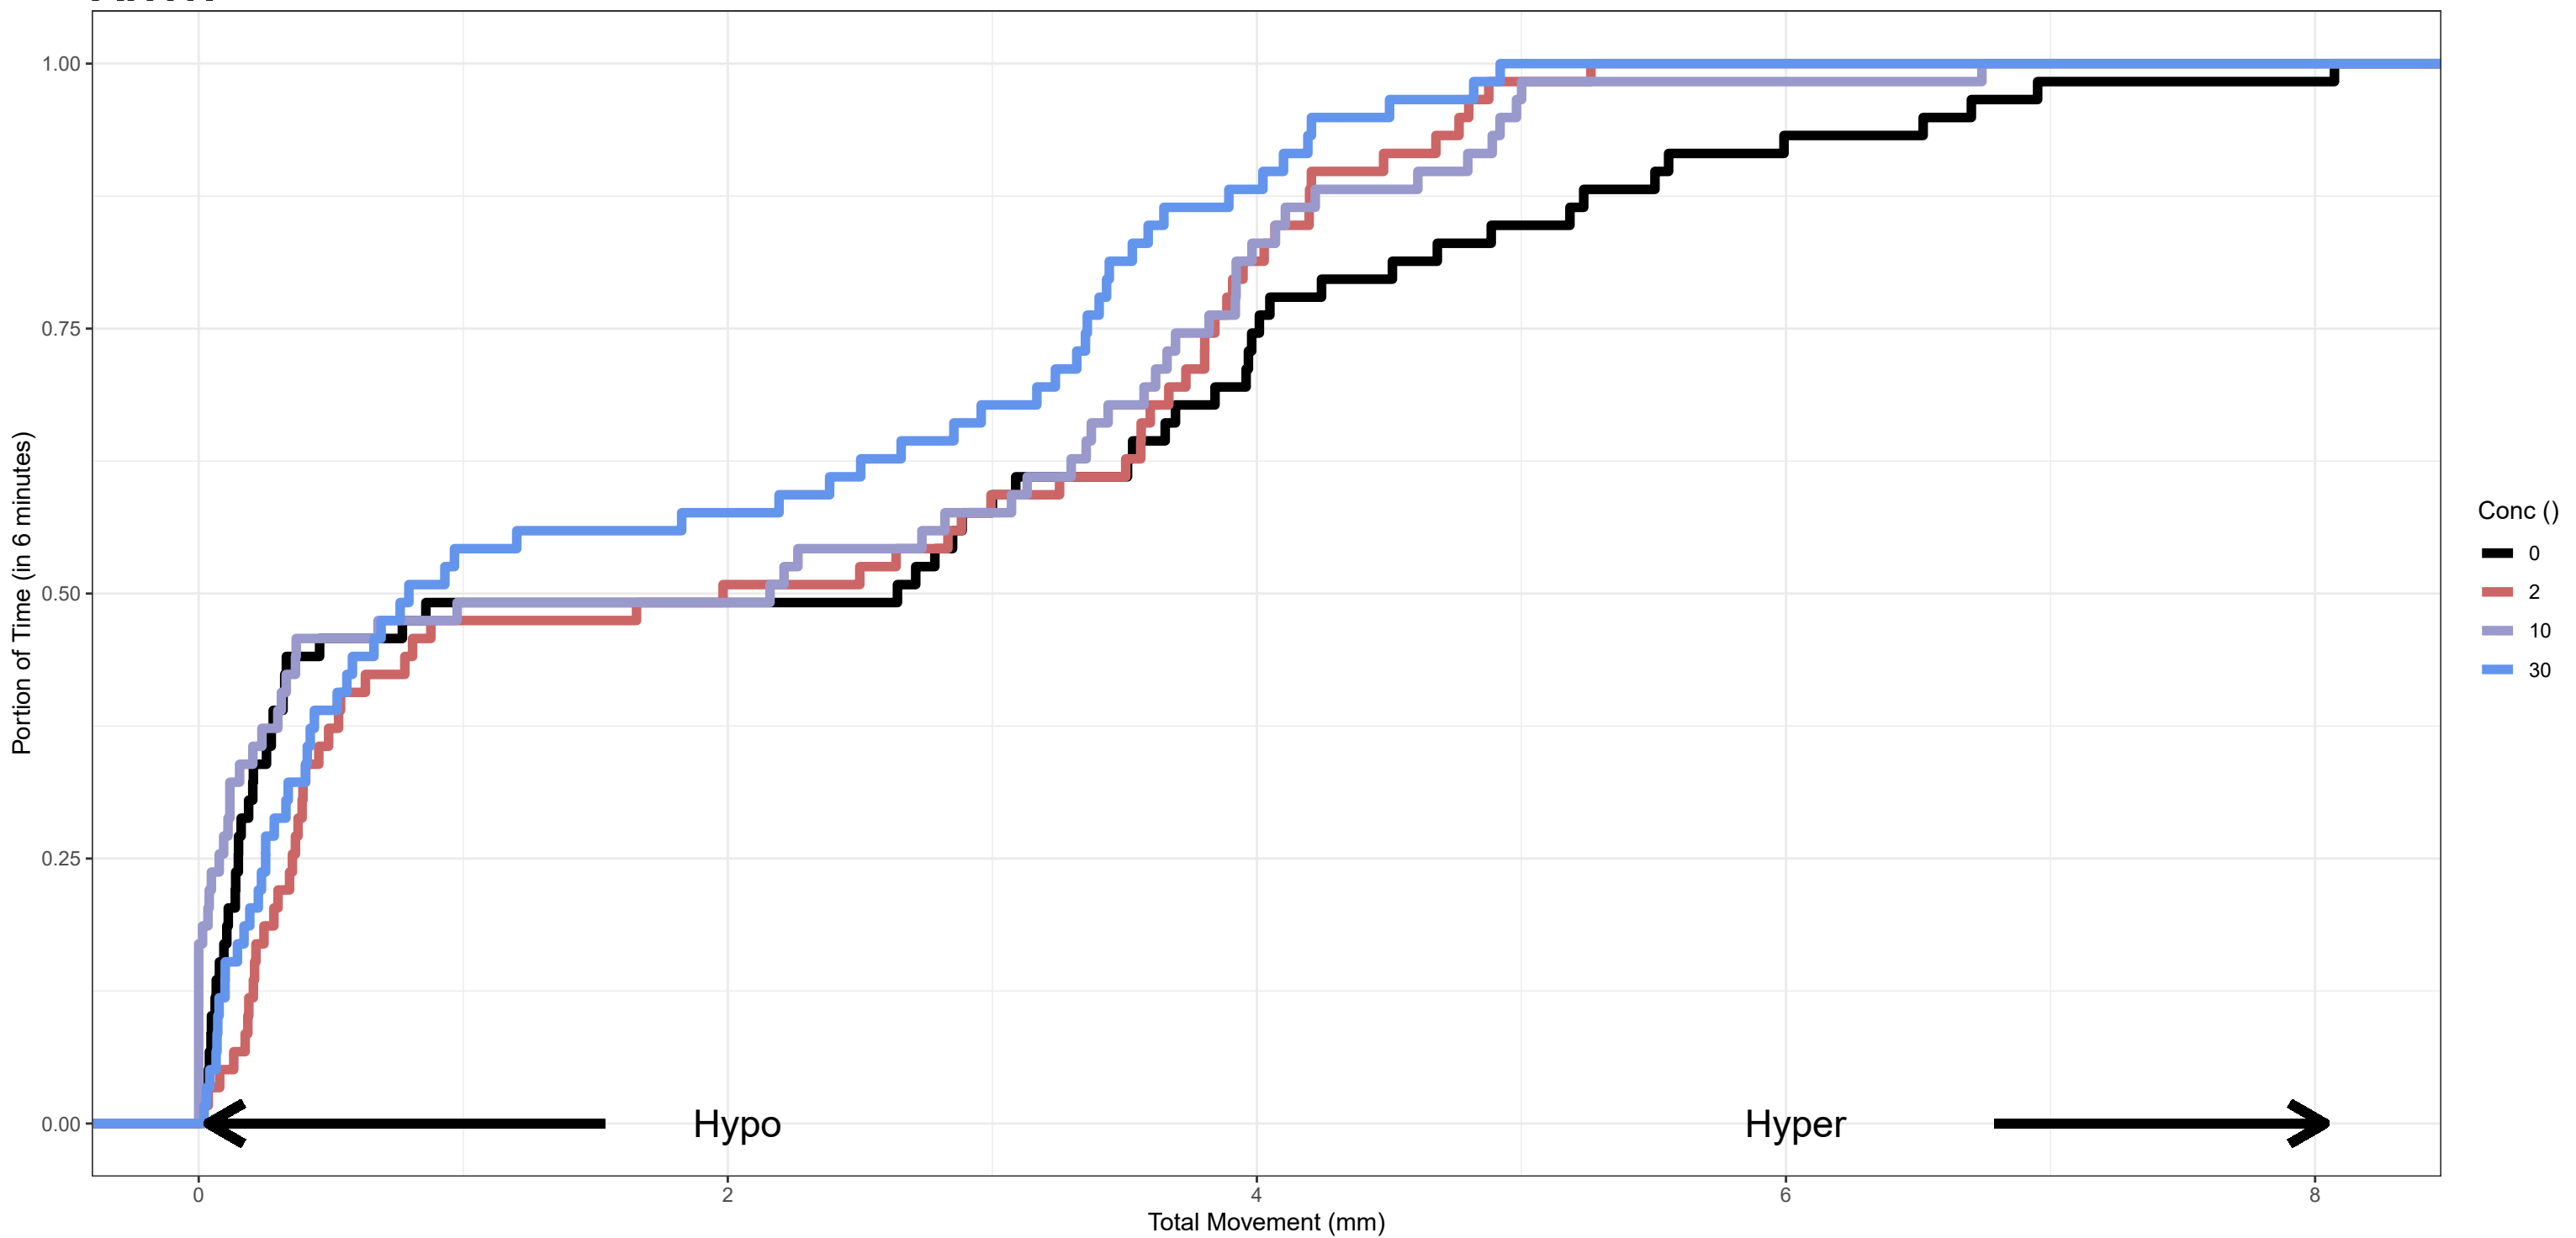



# BBP

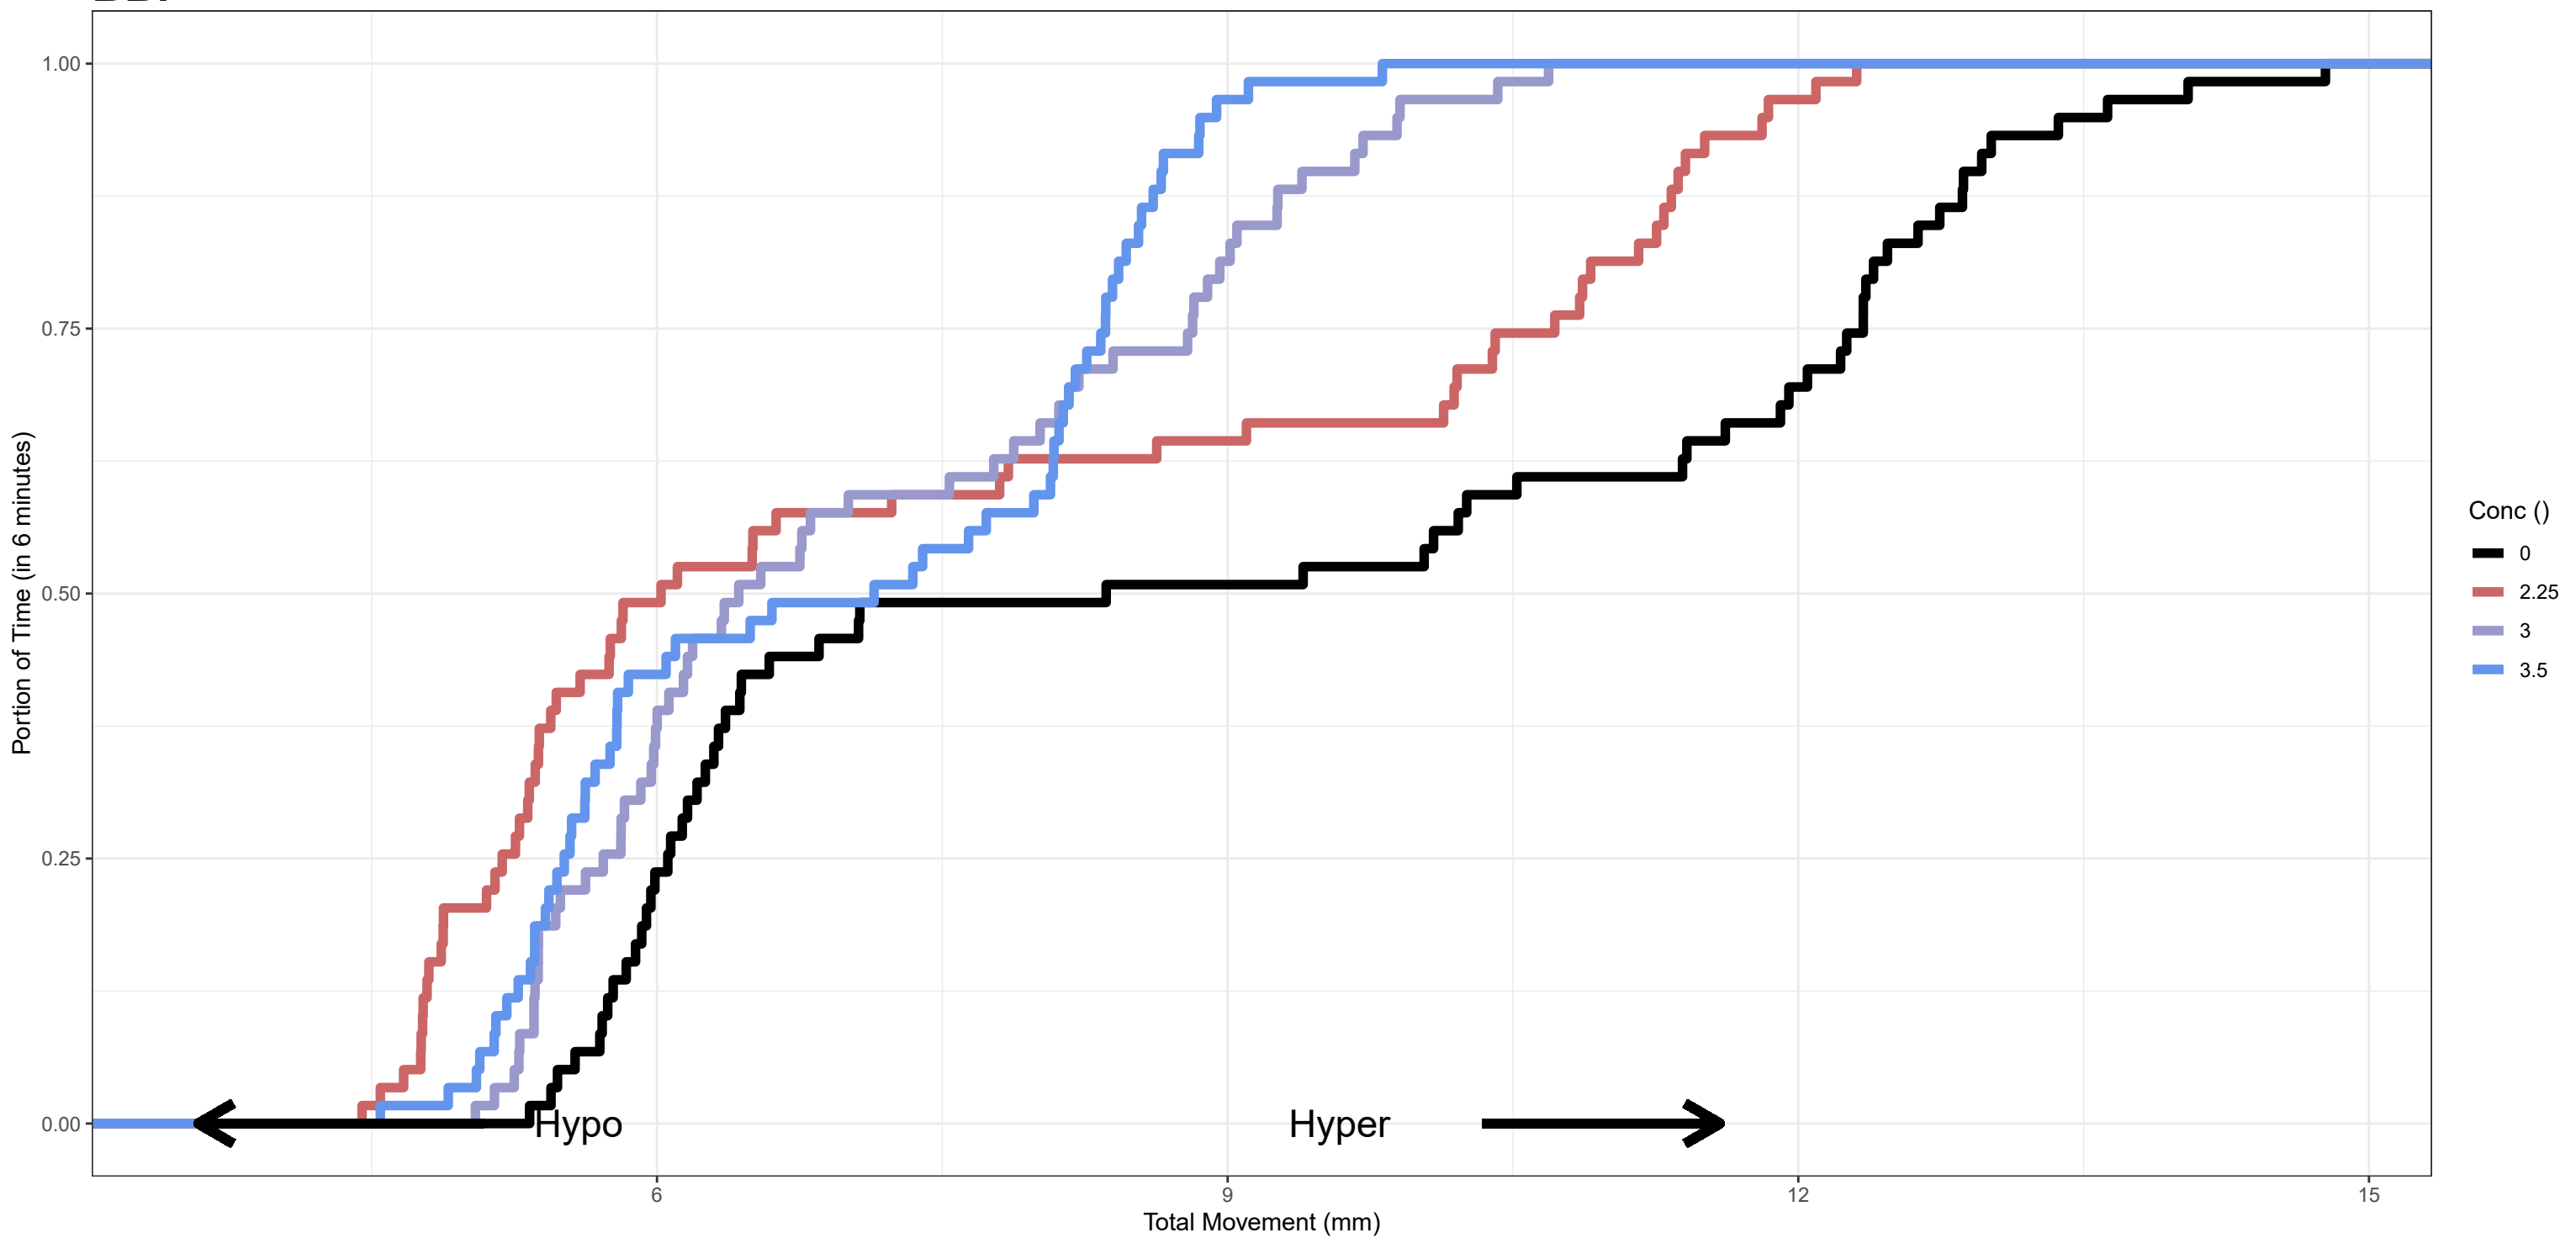



# BHT

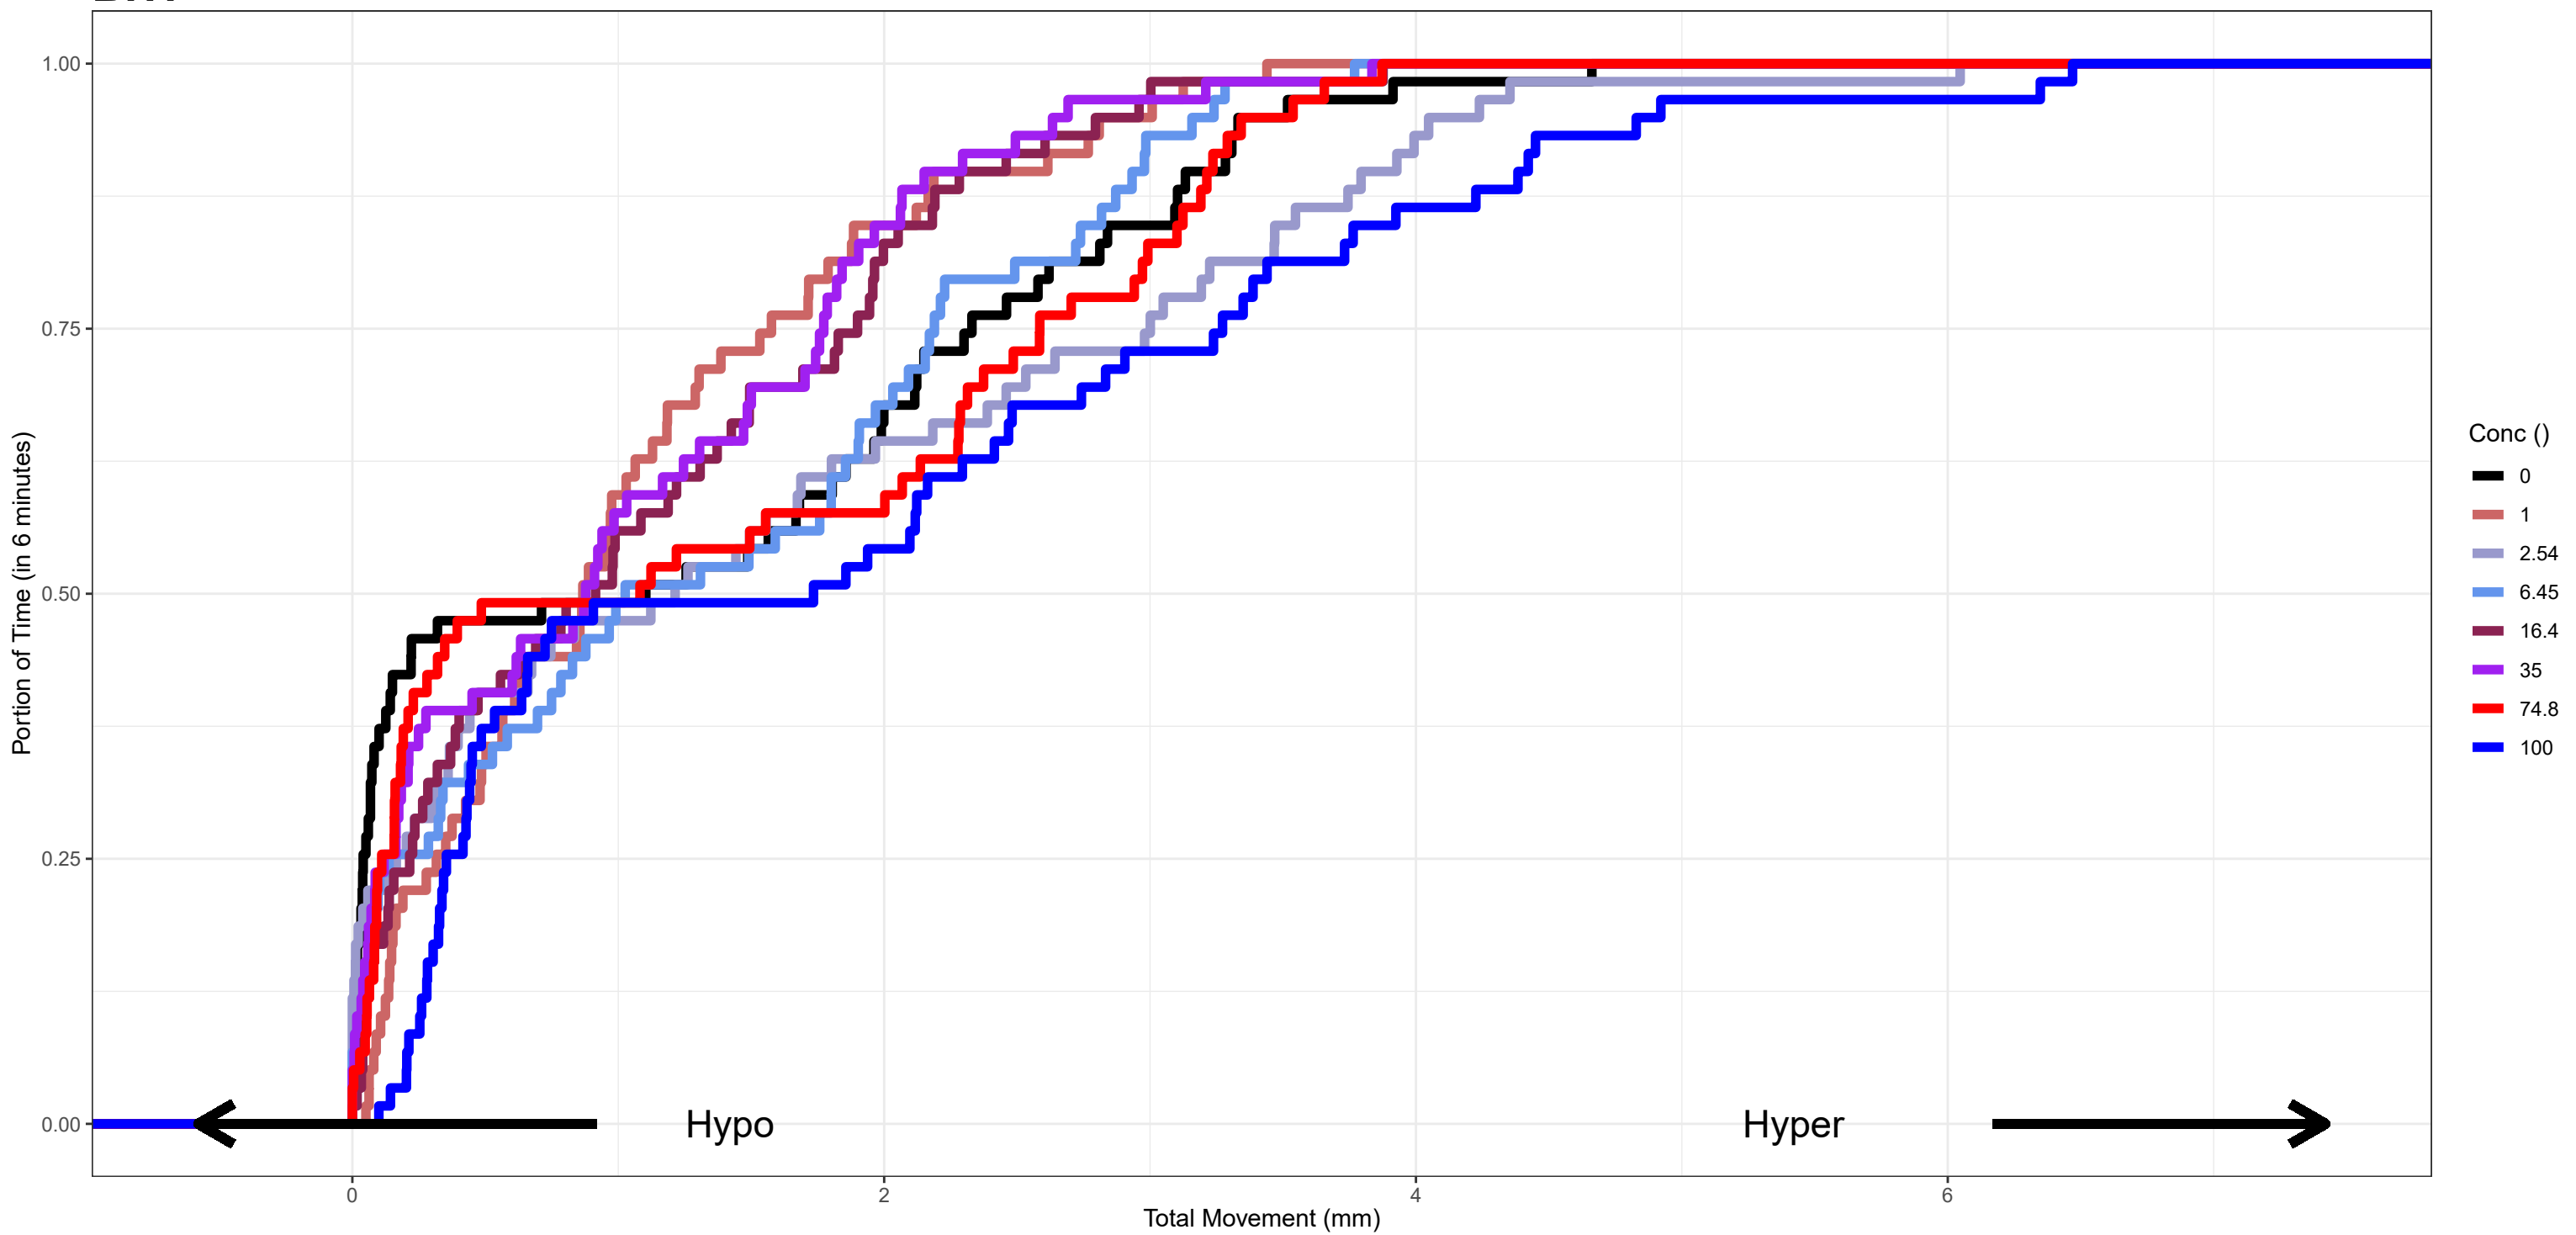



BP

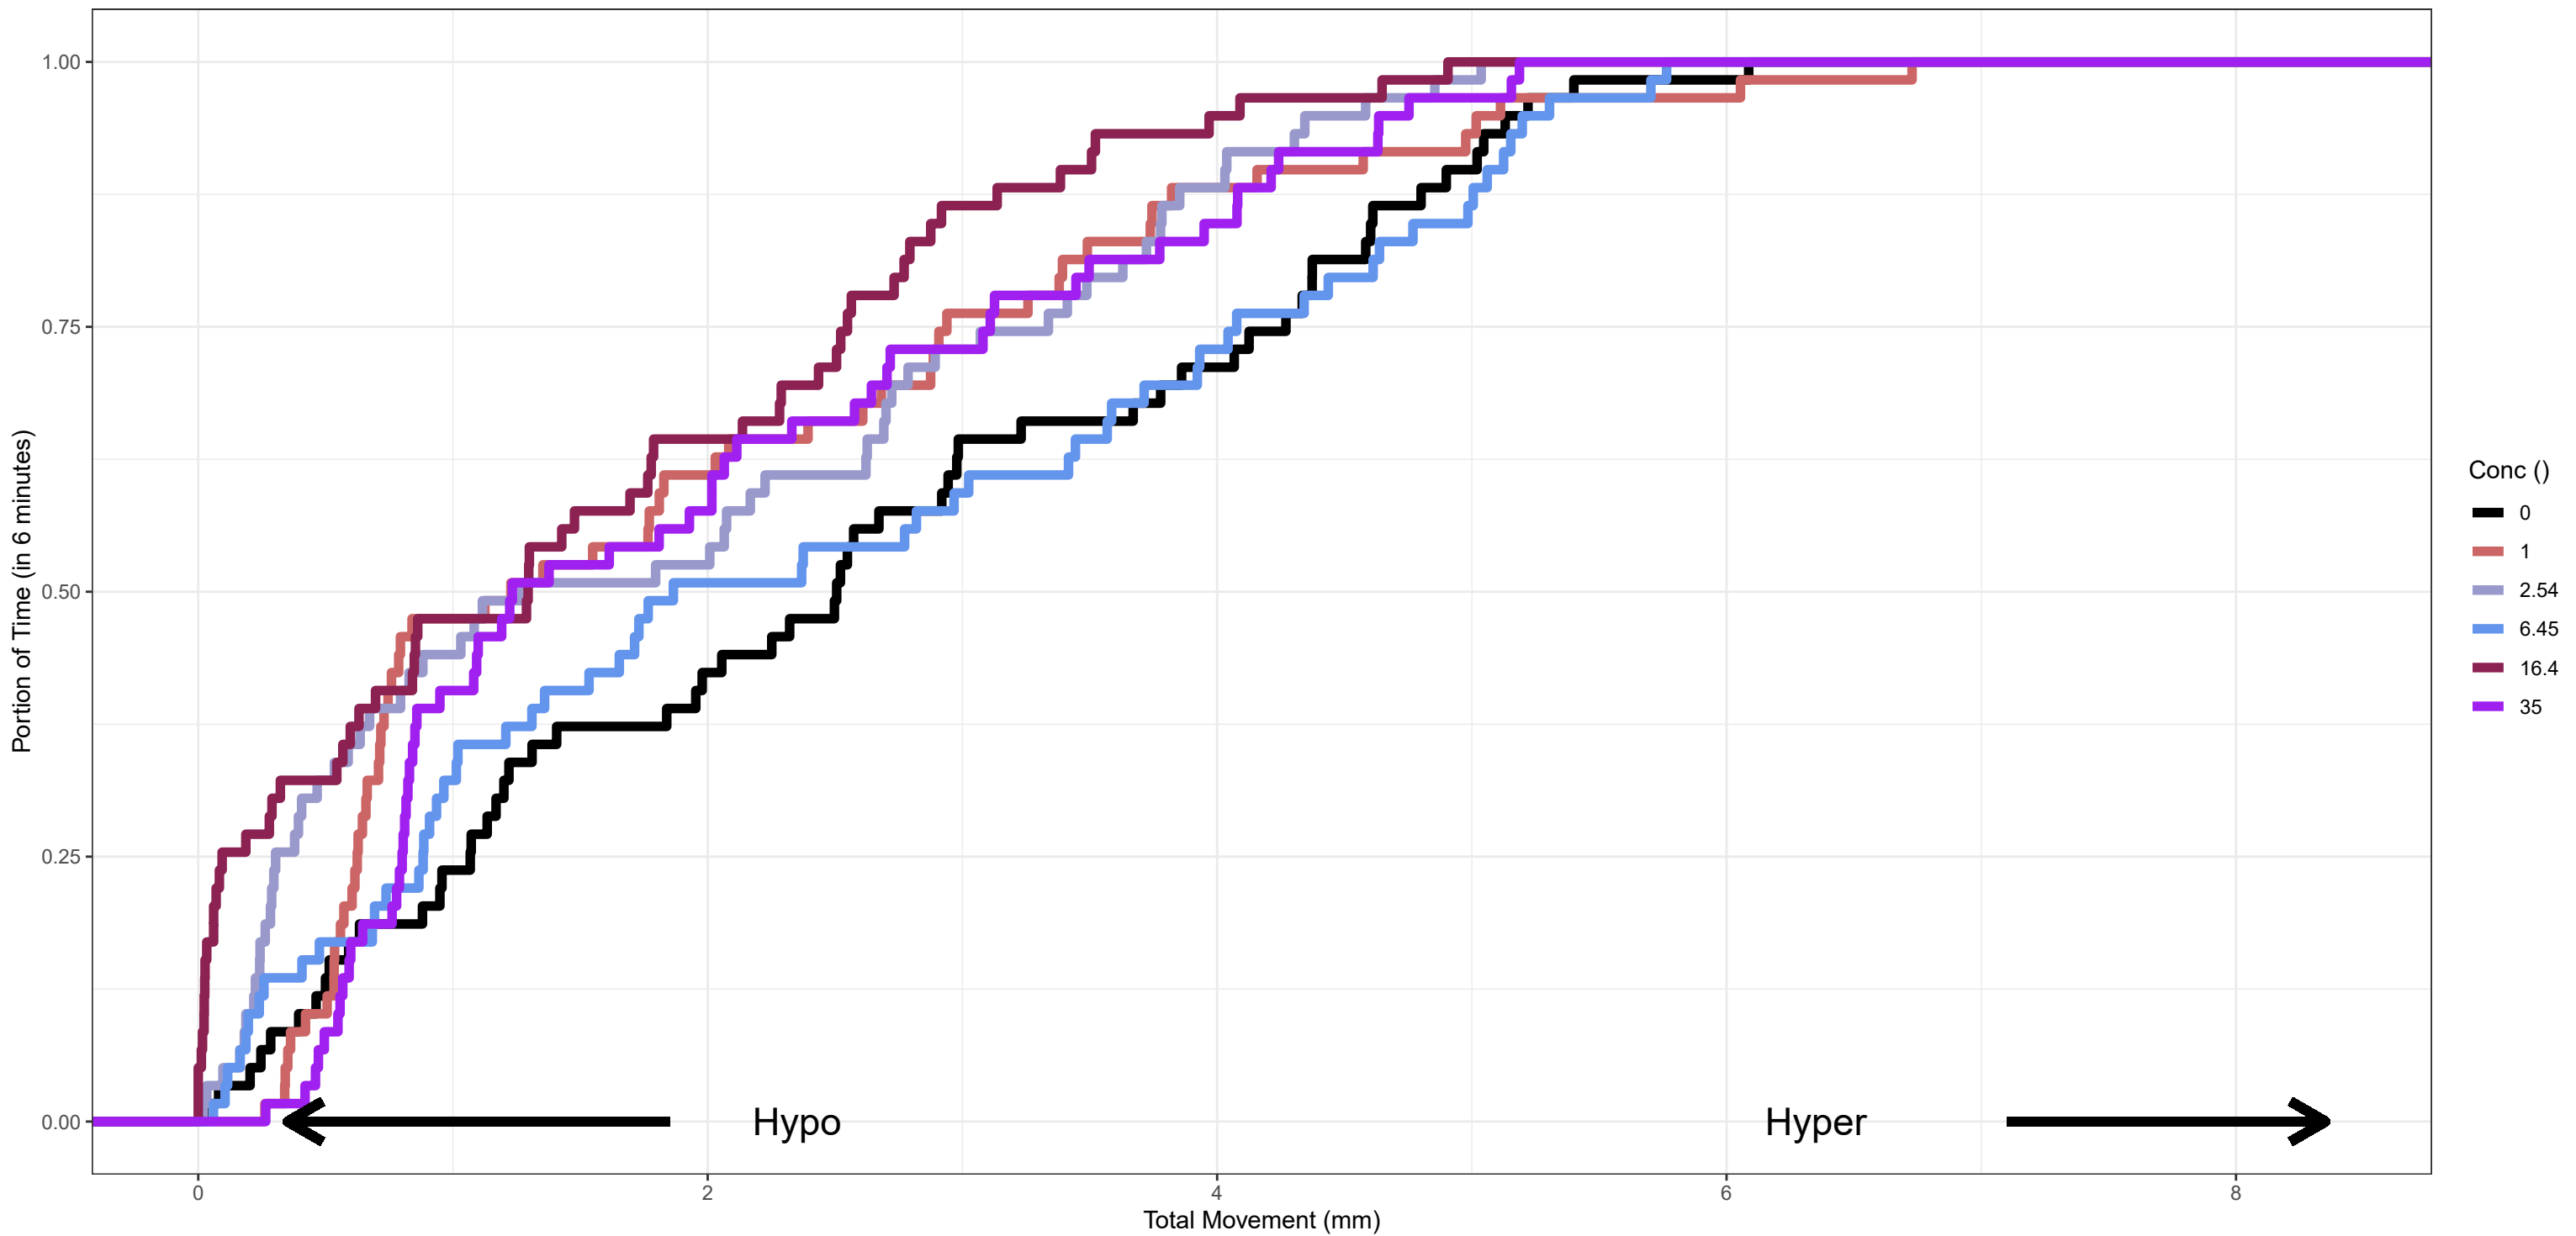



BS

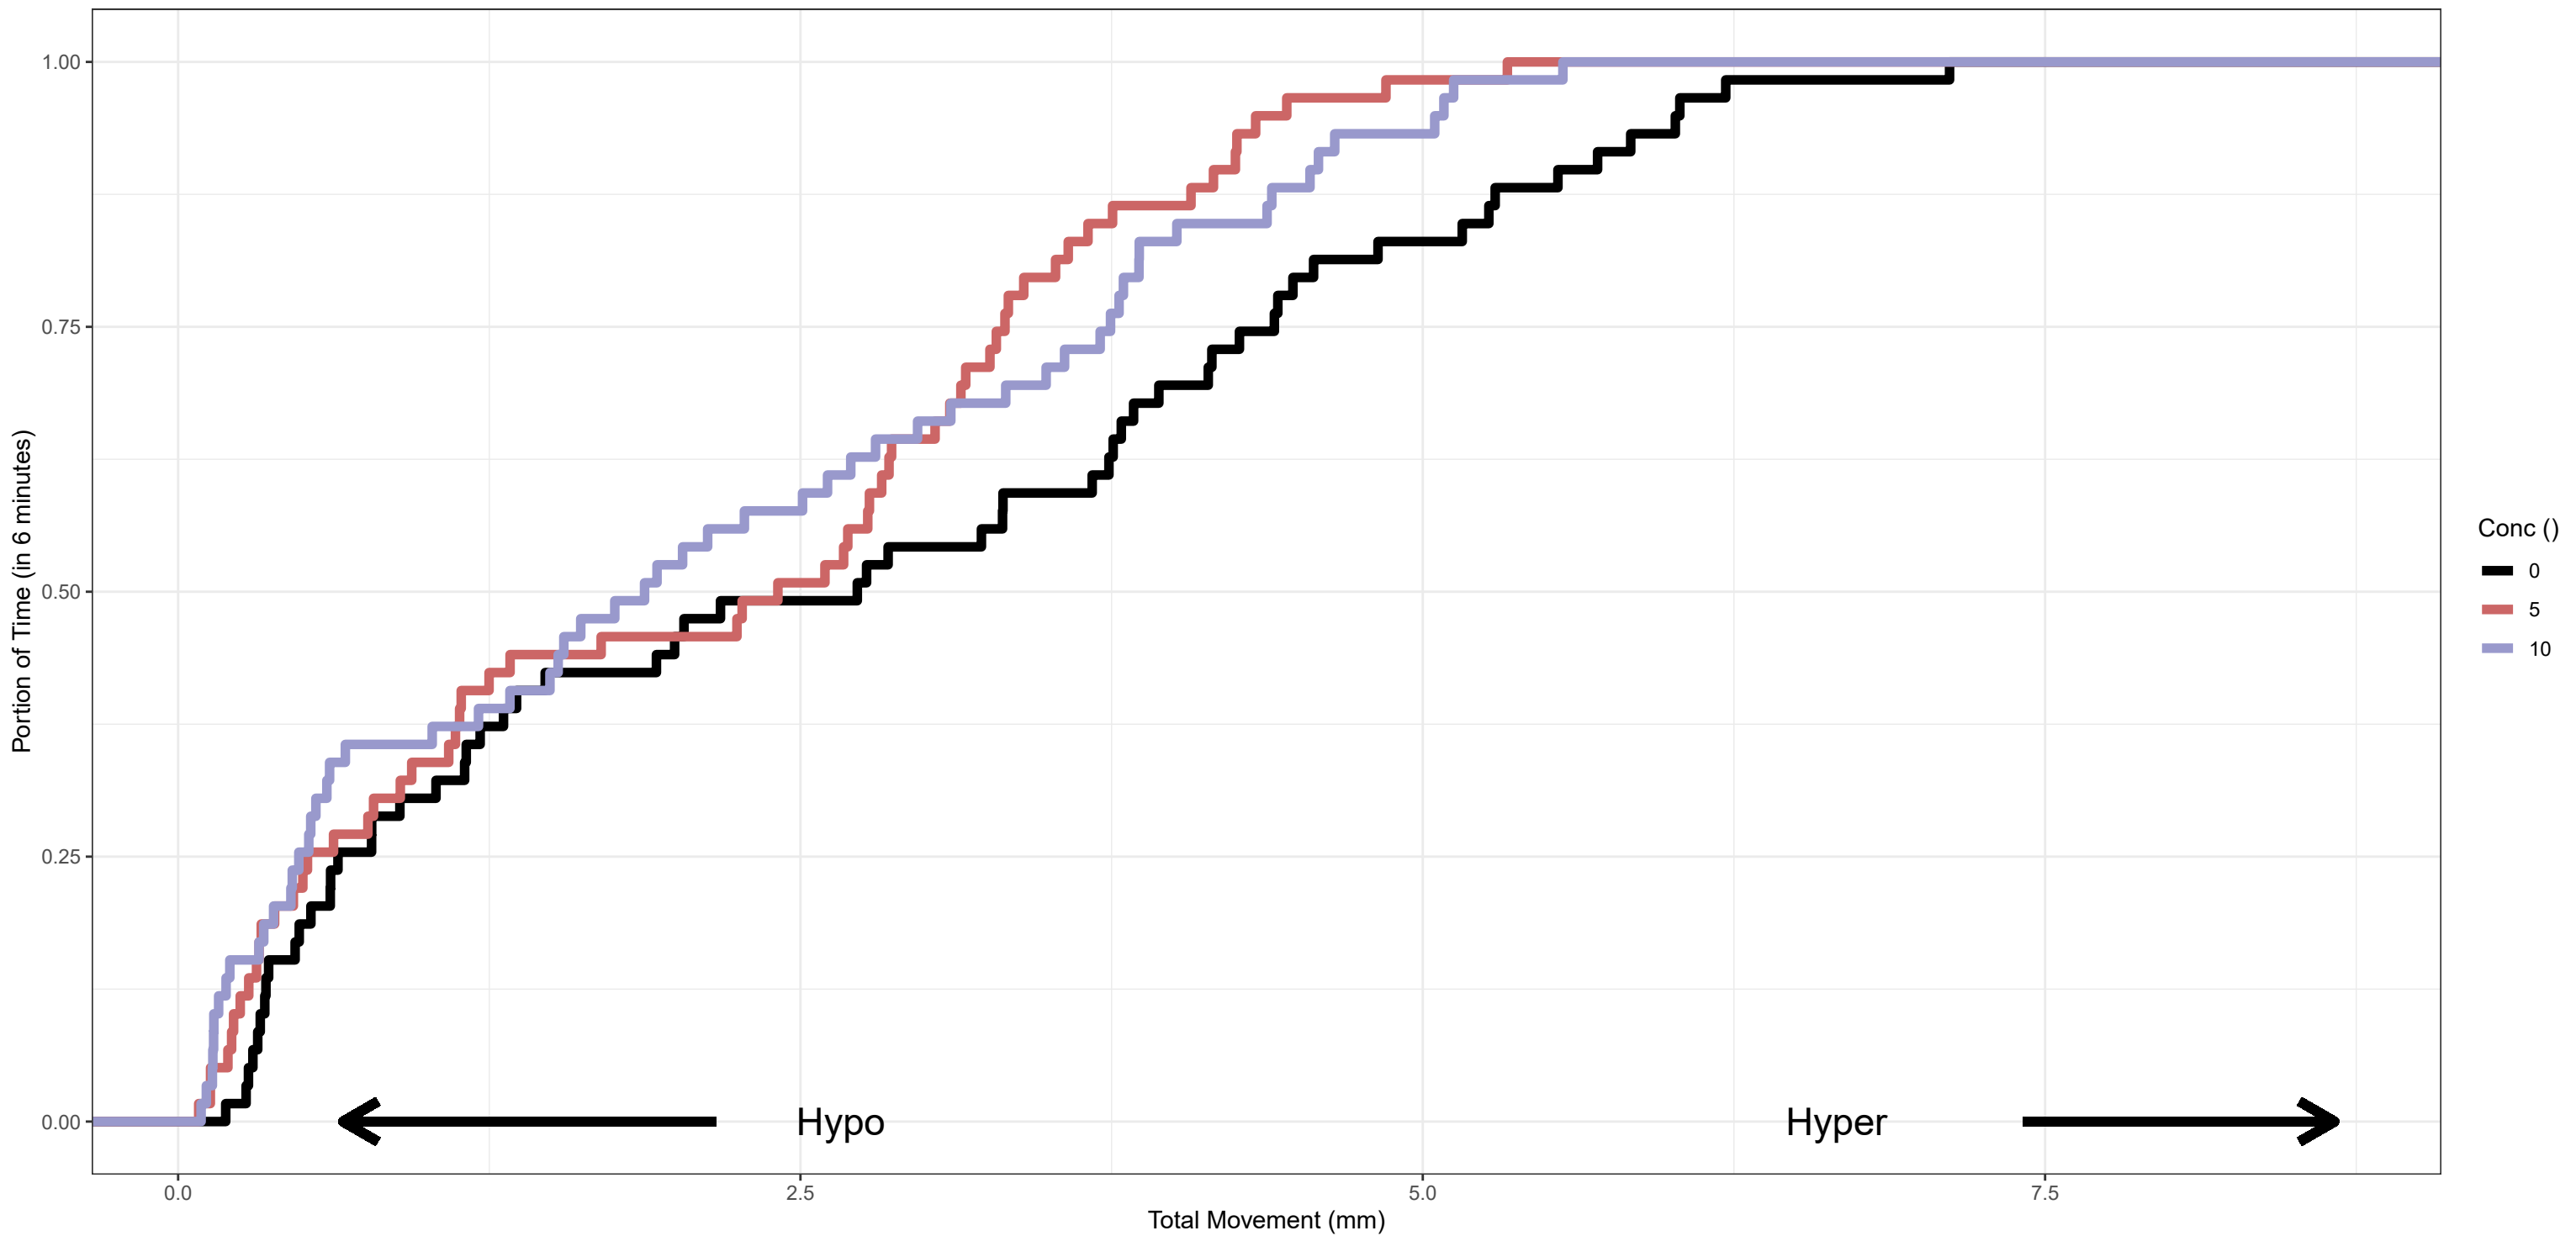



DBP

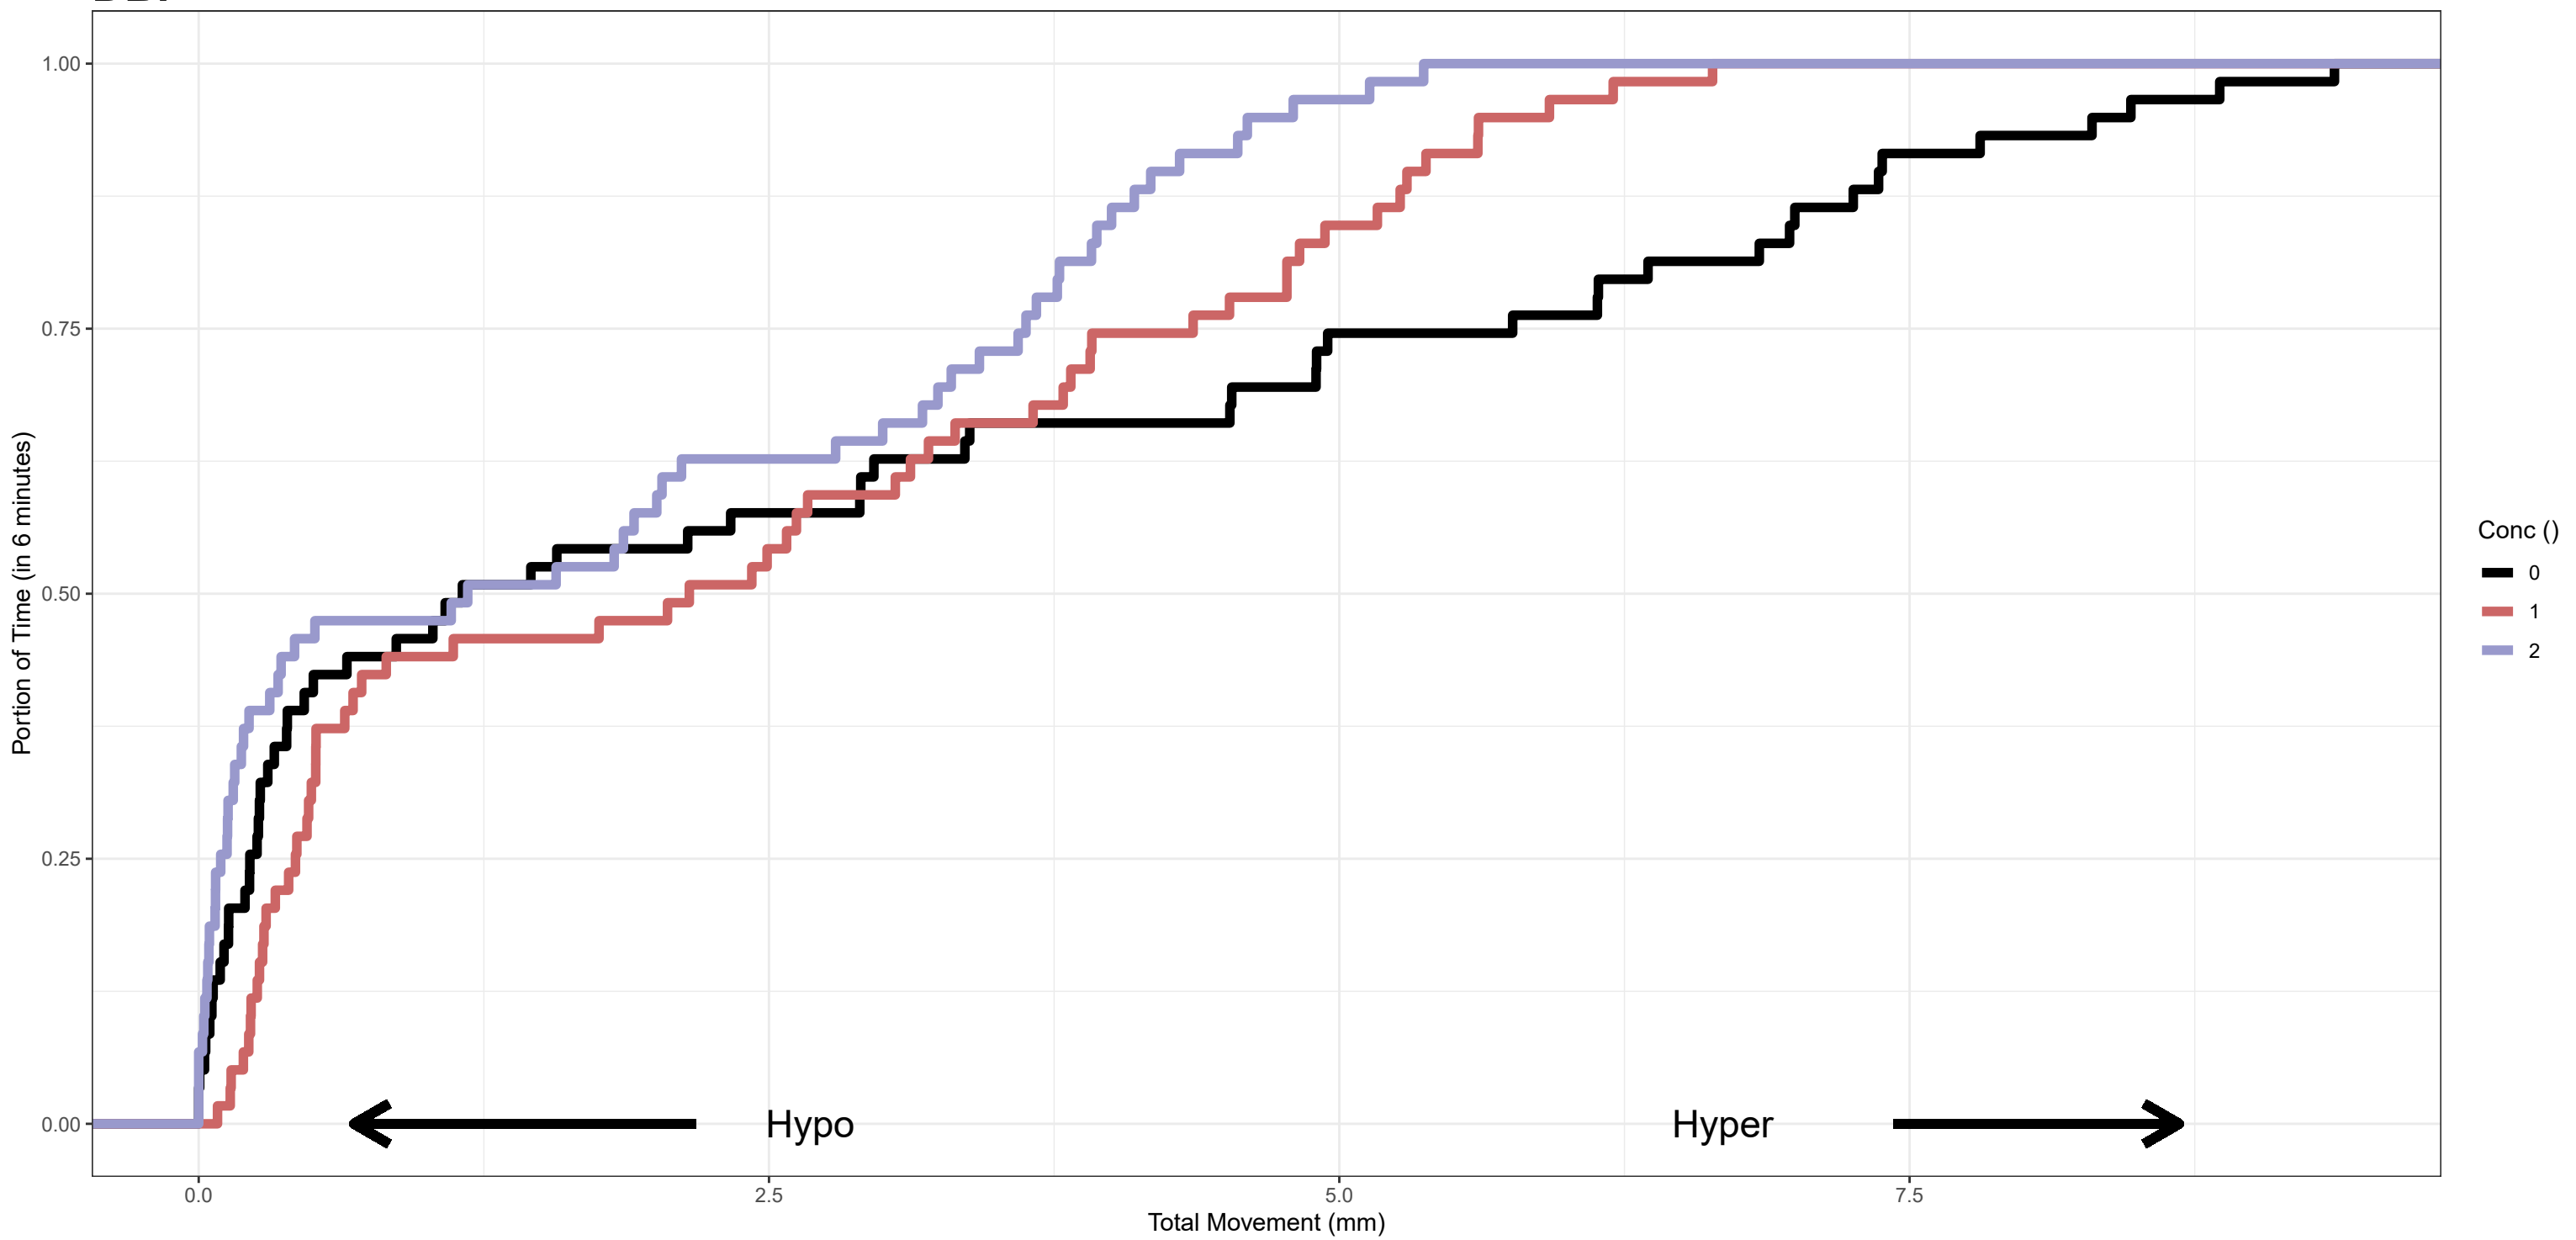



# DEET

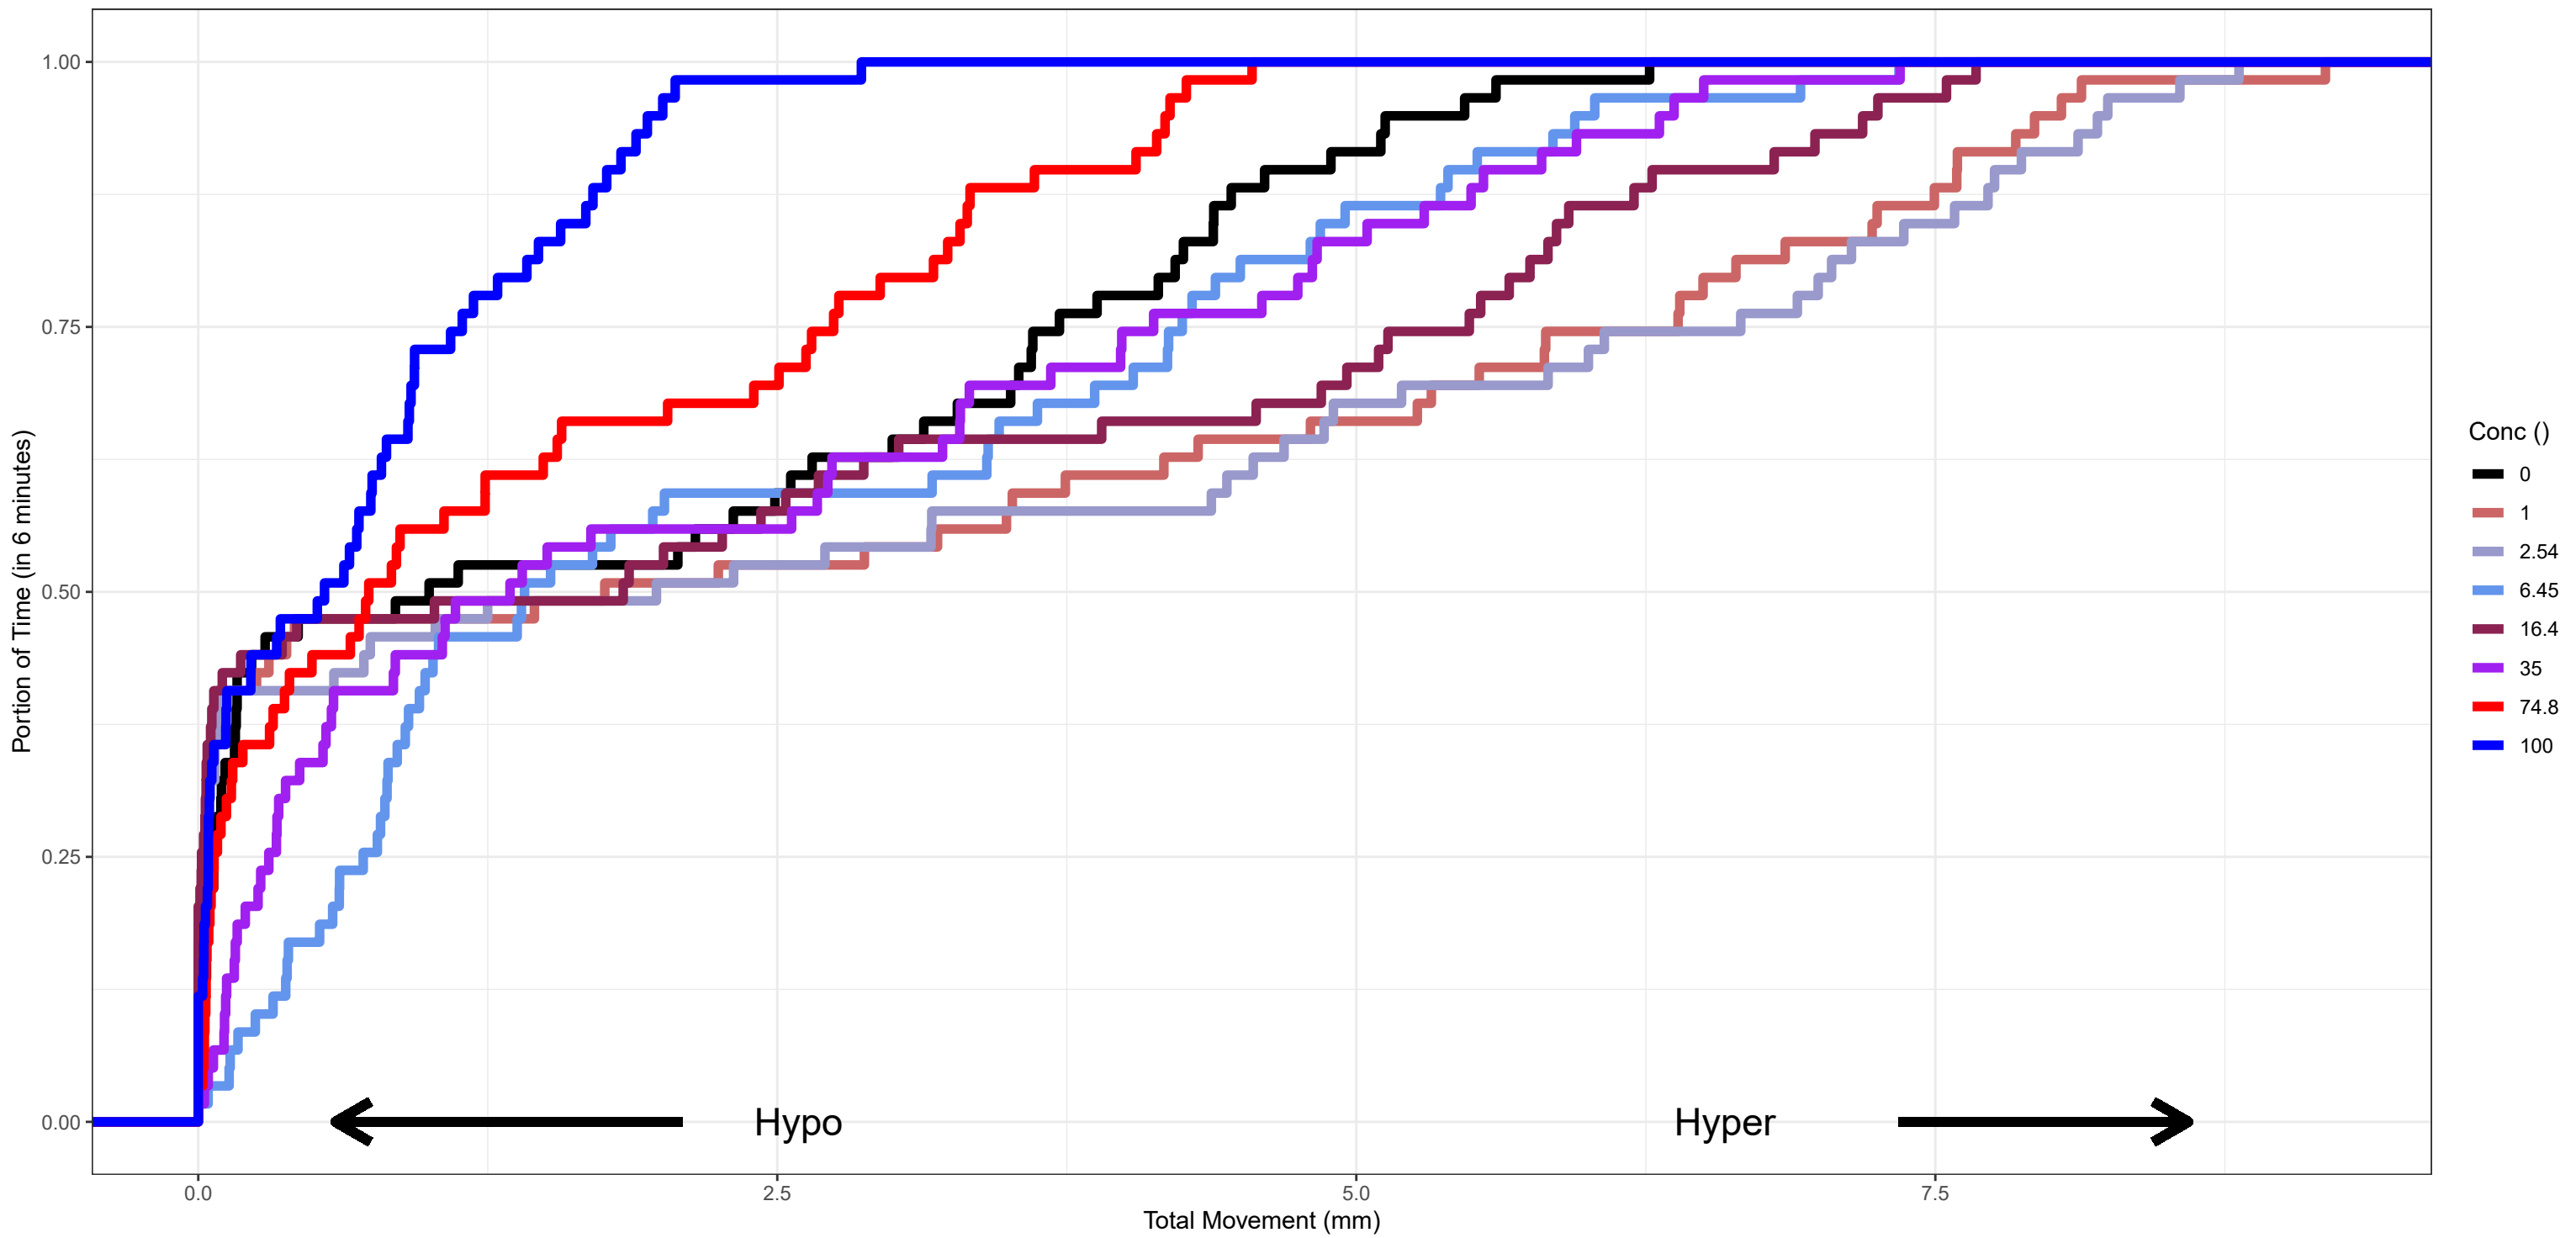



0  
1  
3  
5  
10  
20  
40  
80



DEP

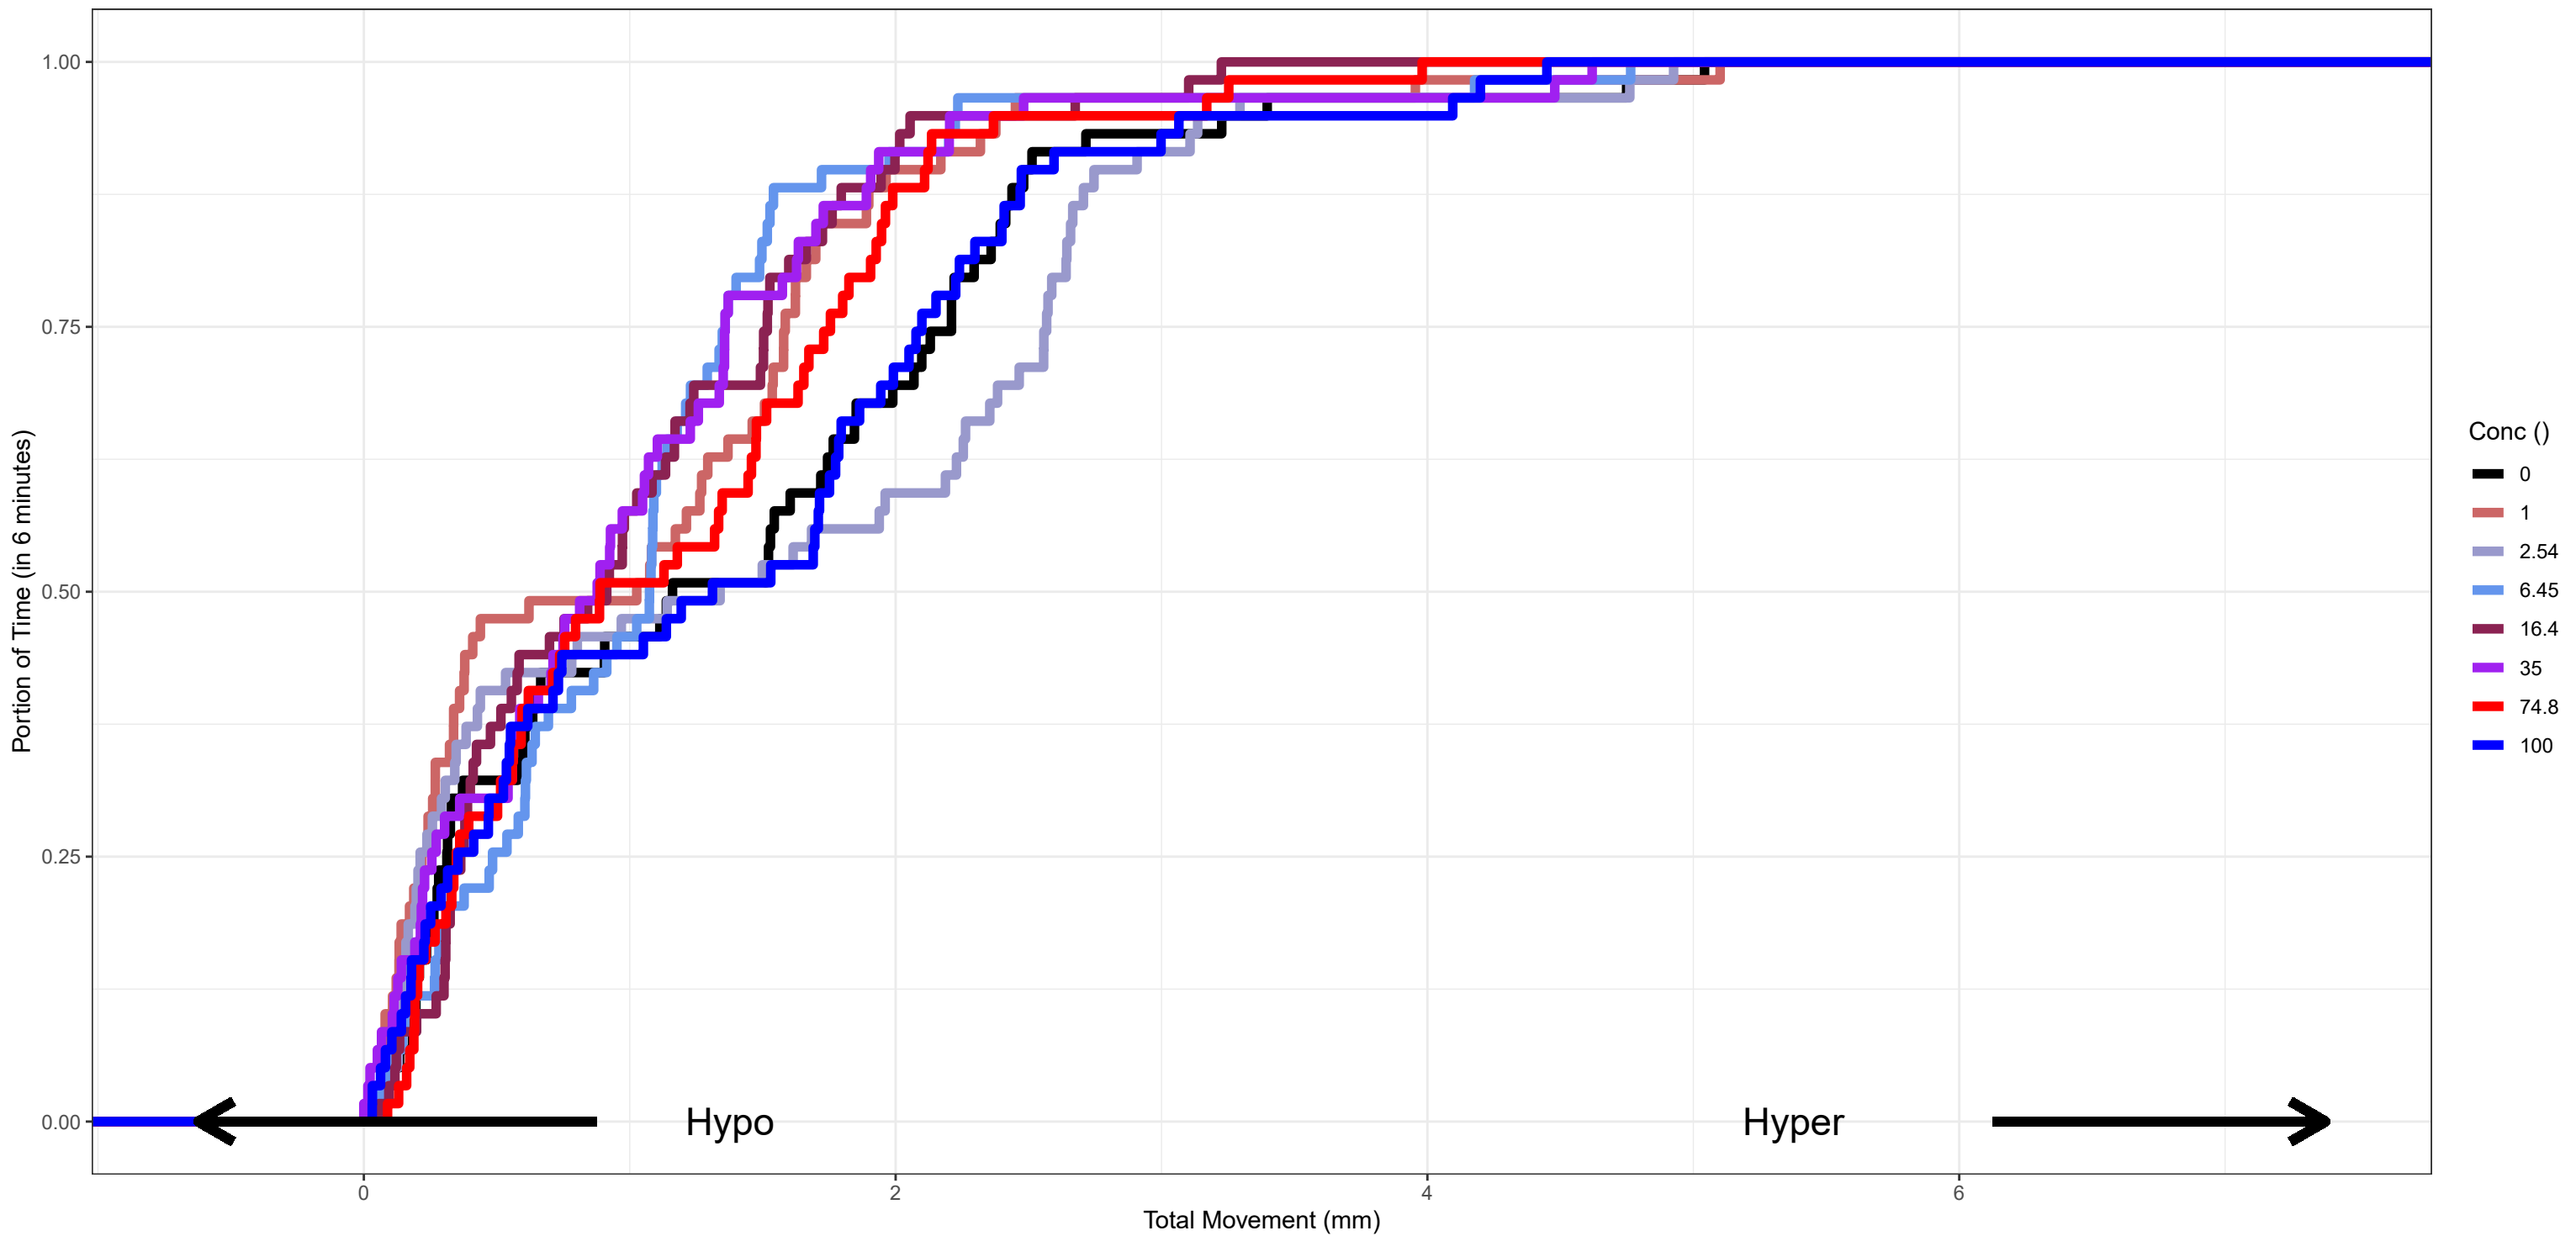



# DIBP

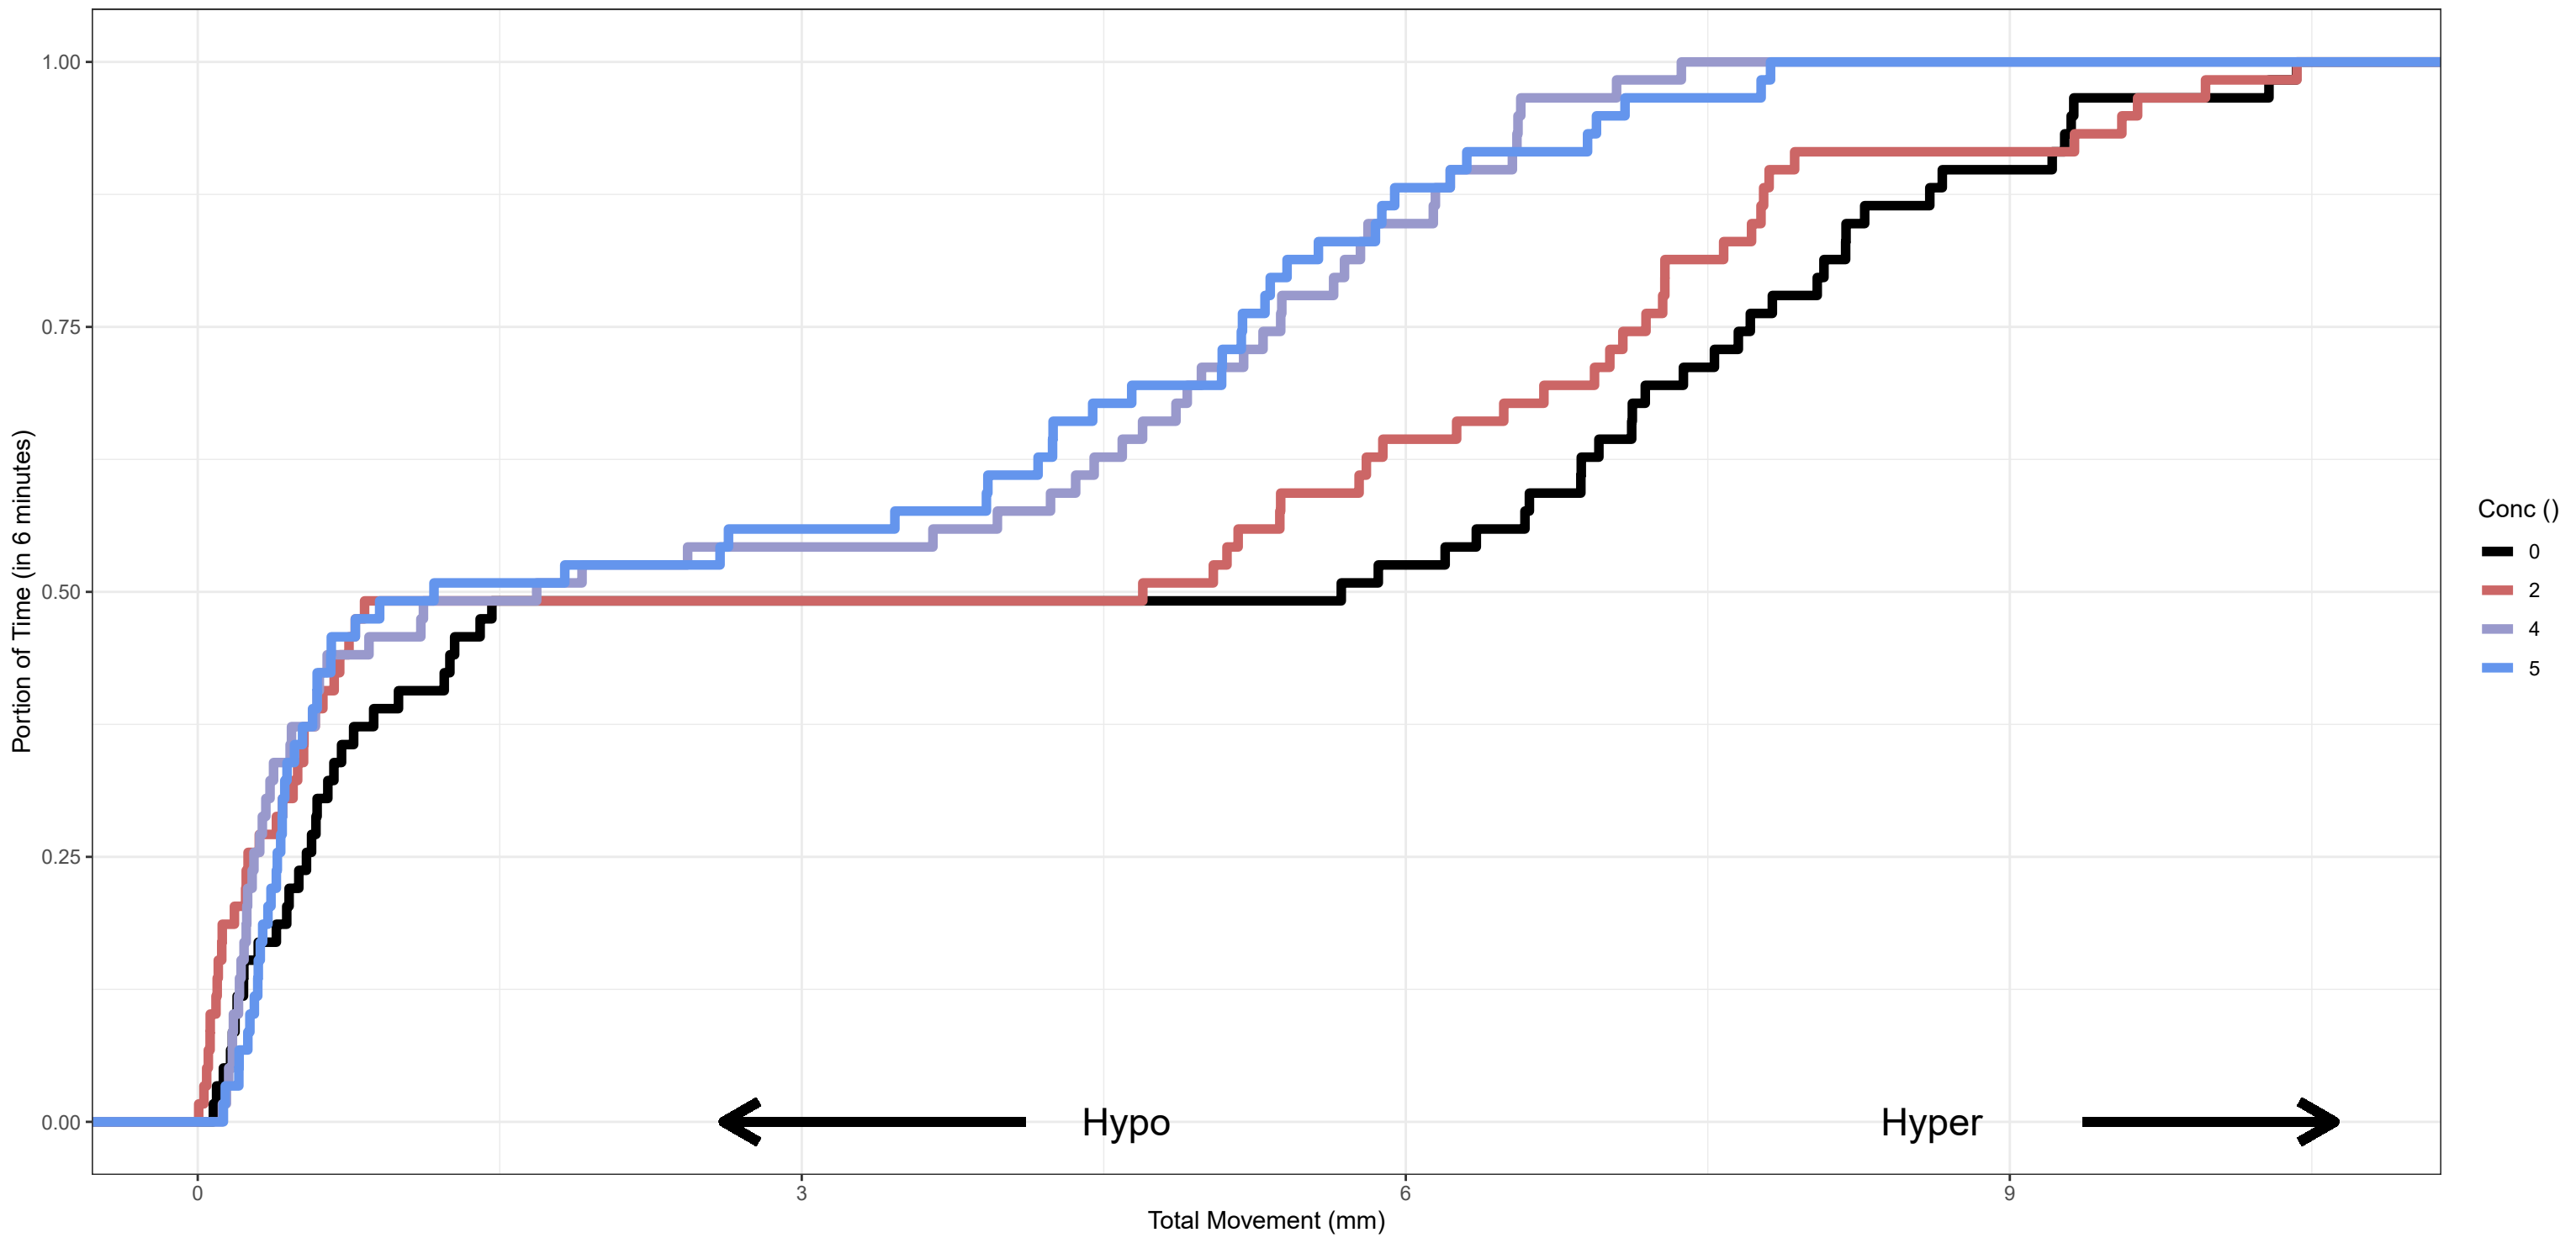



# DNP

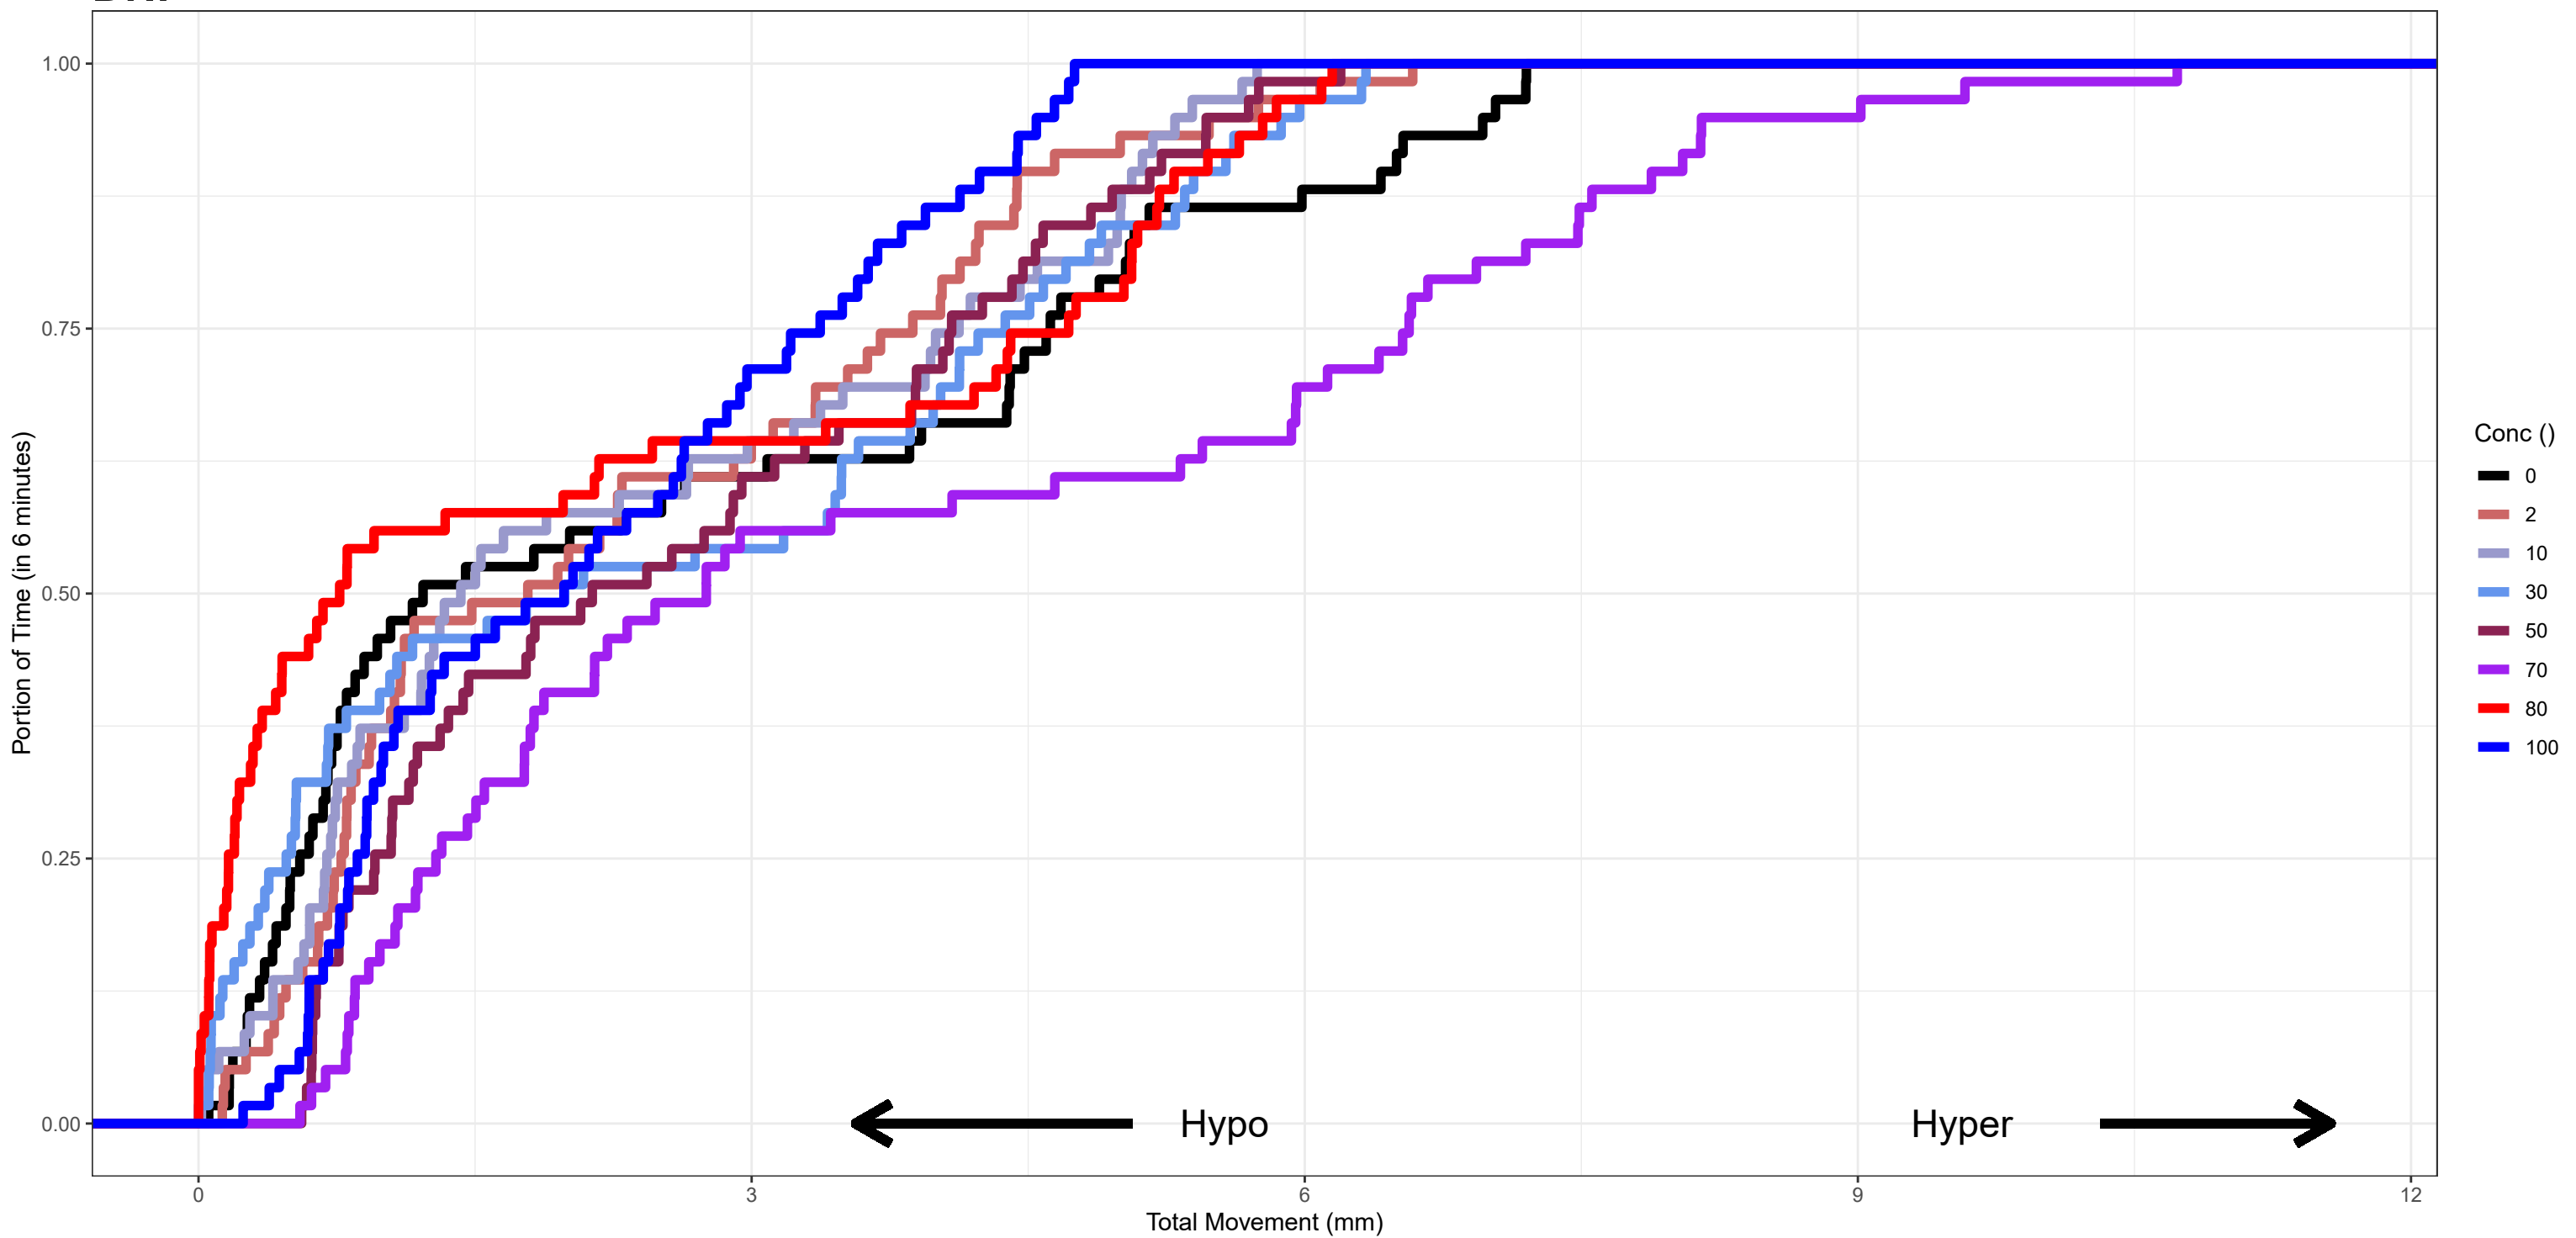



# HHCB

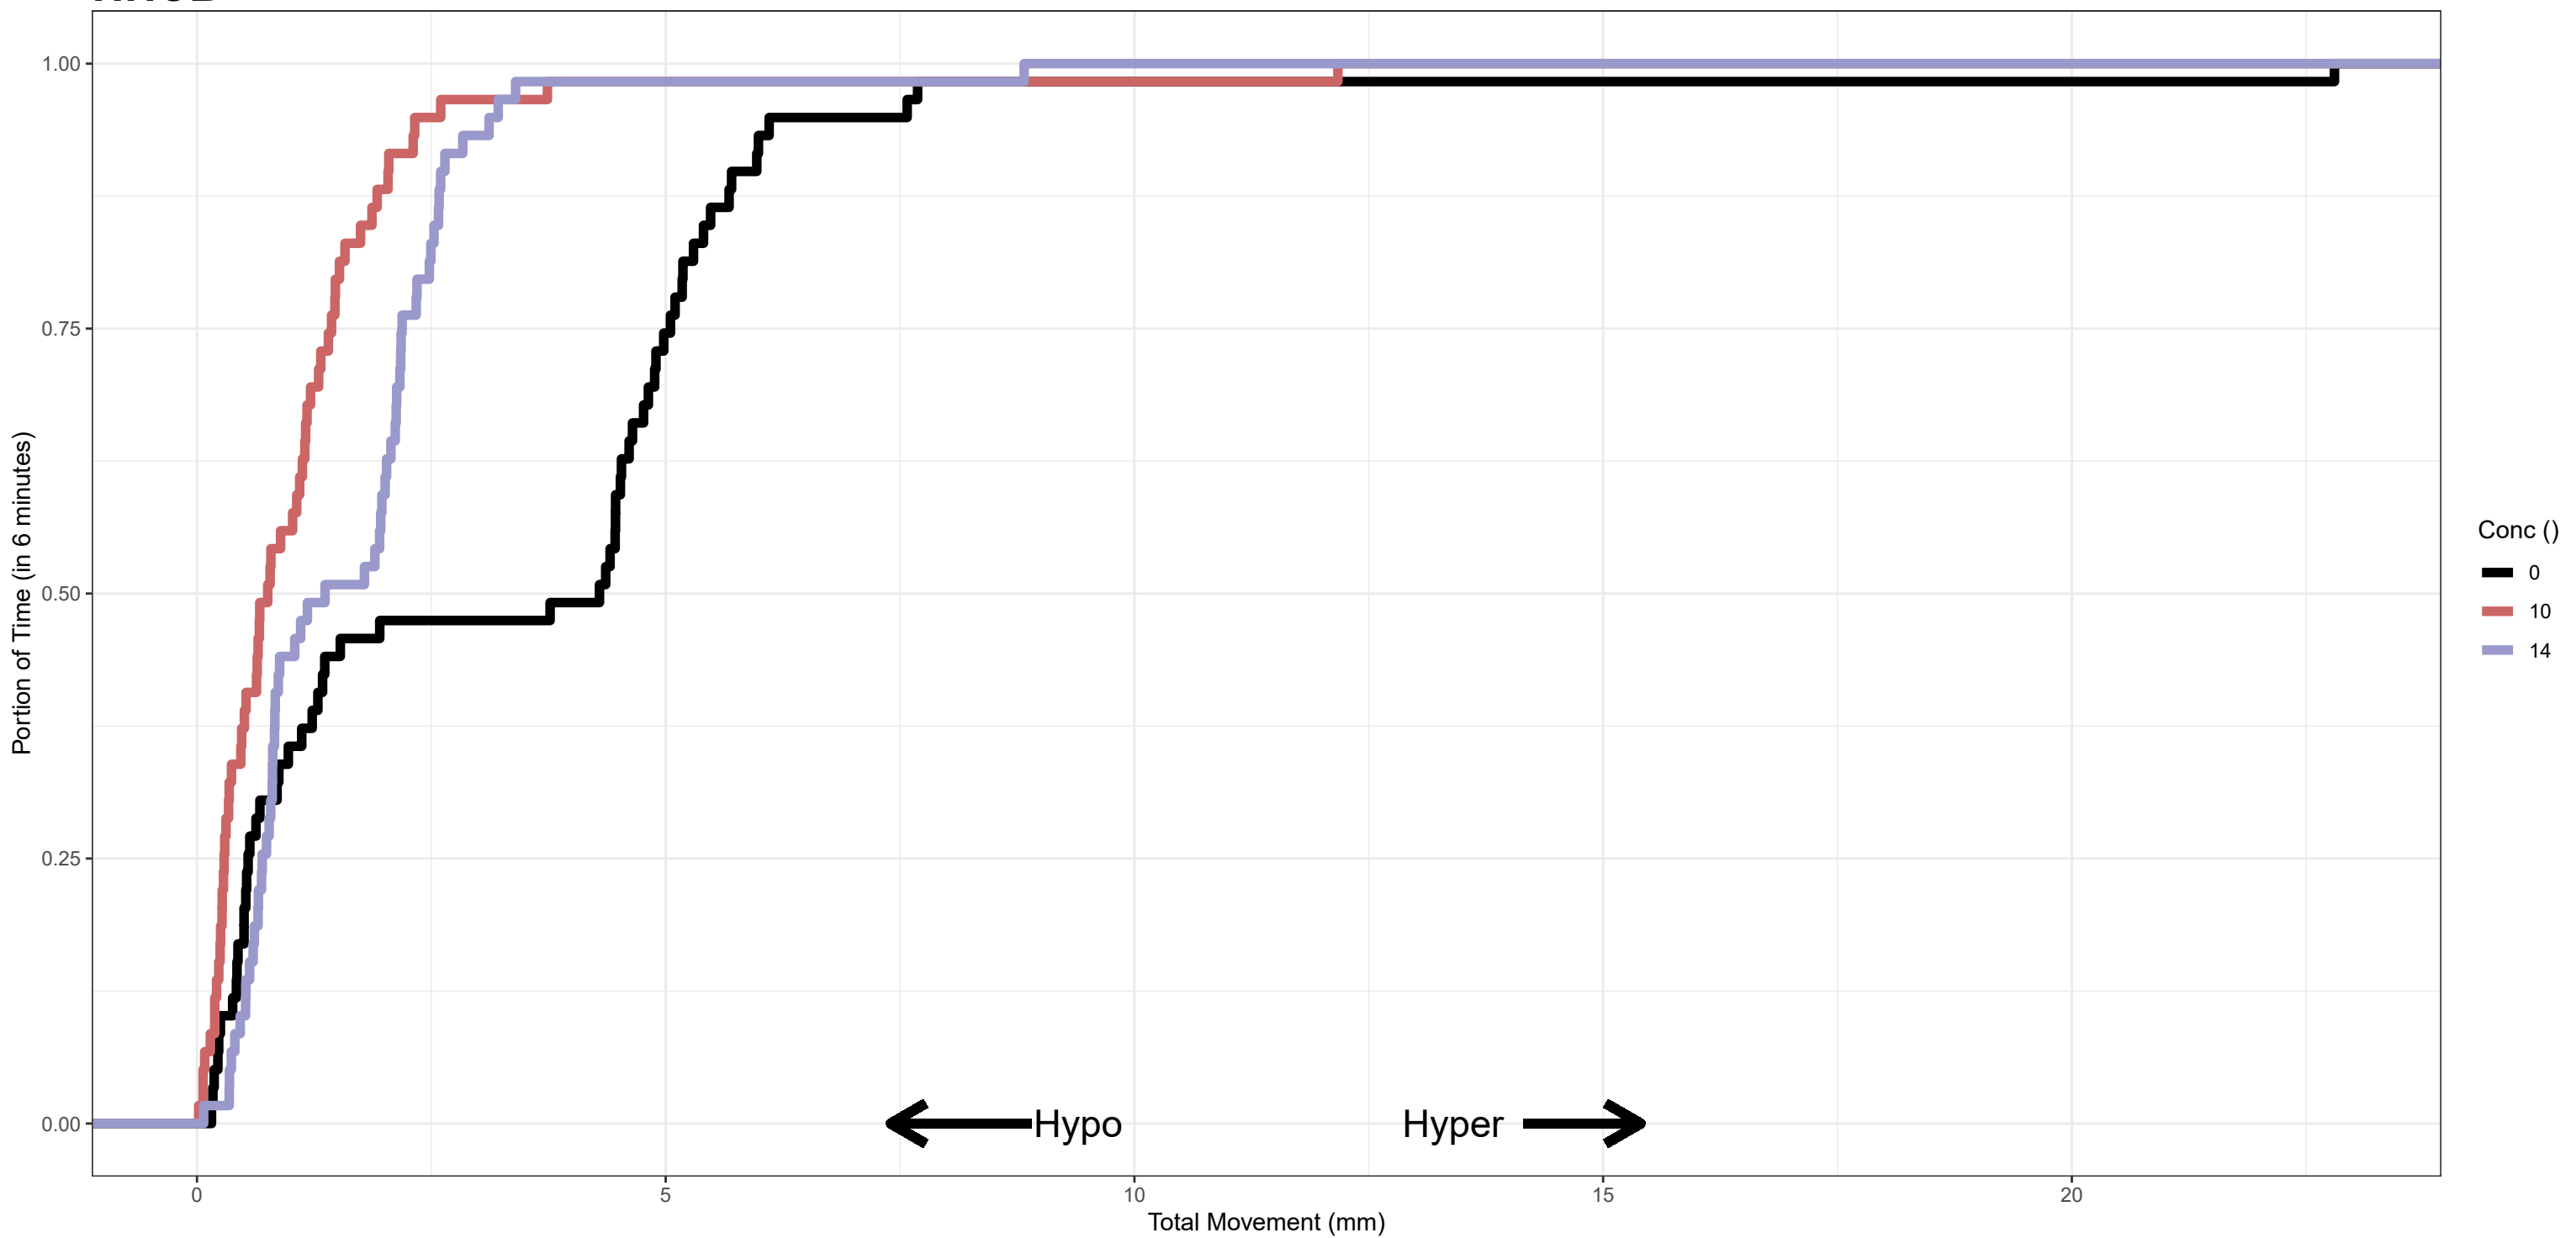



Lilial

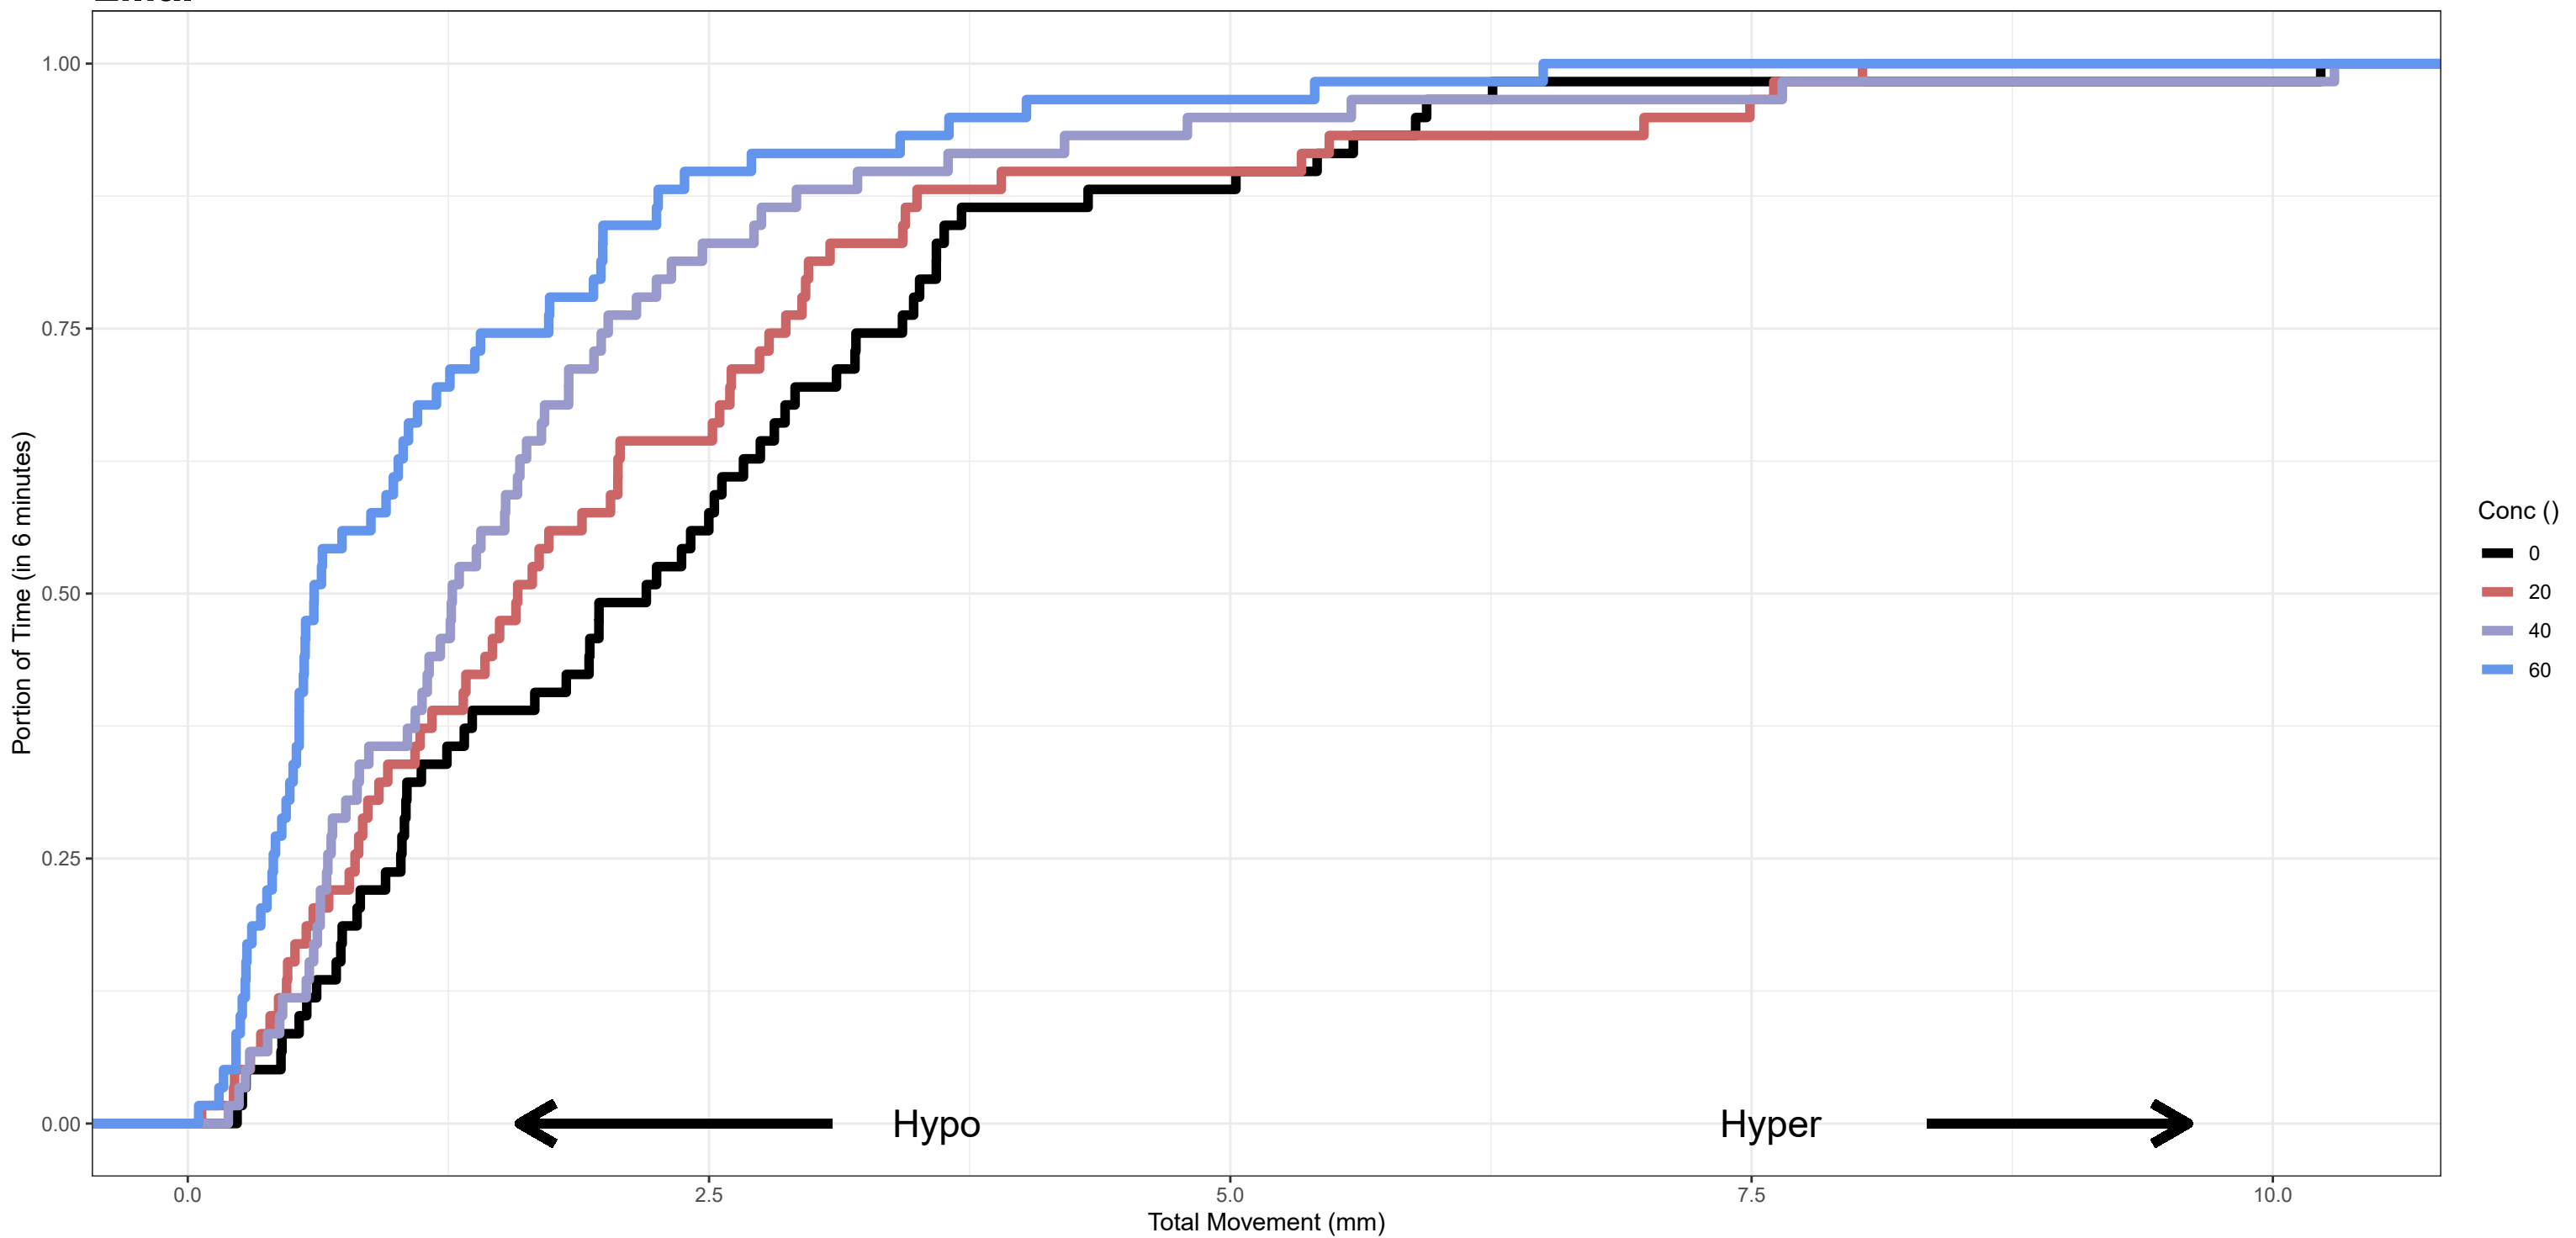



# TPP

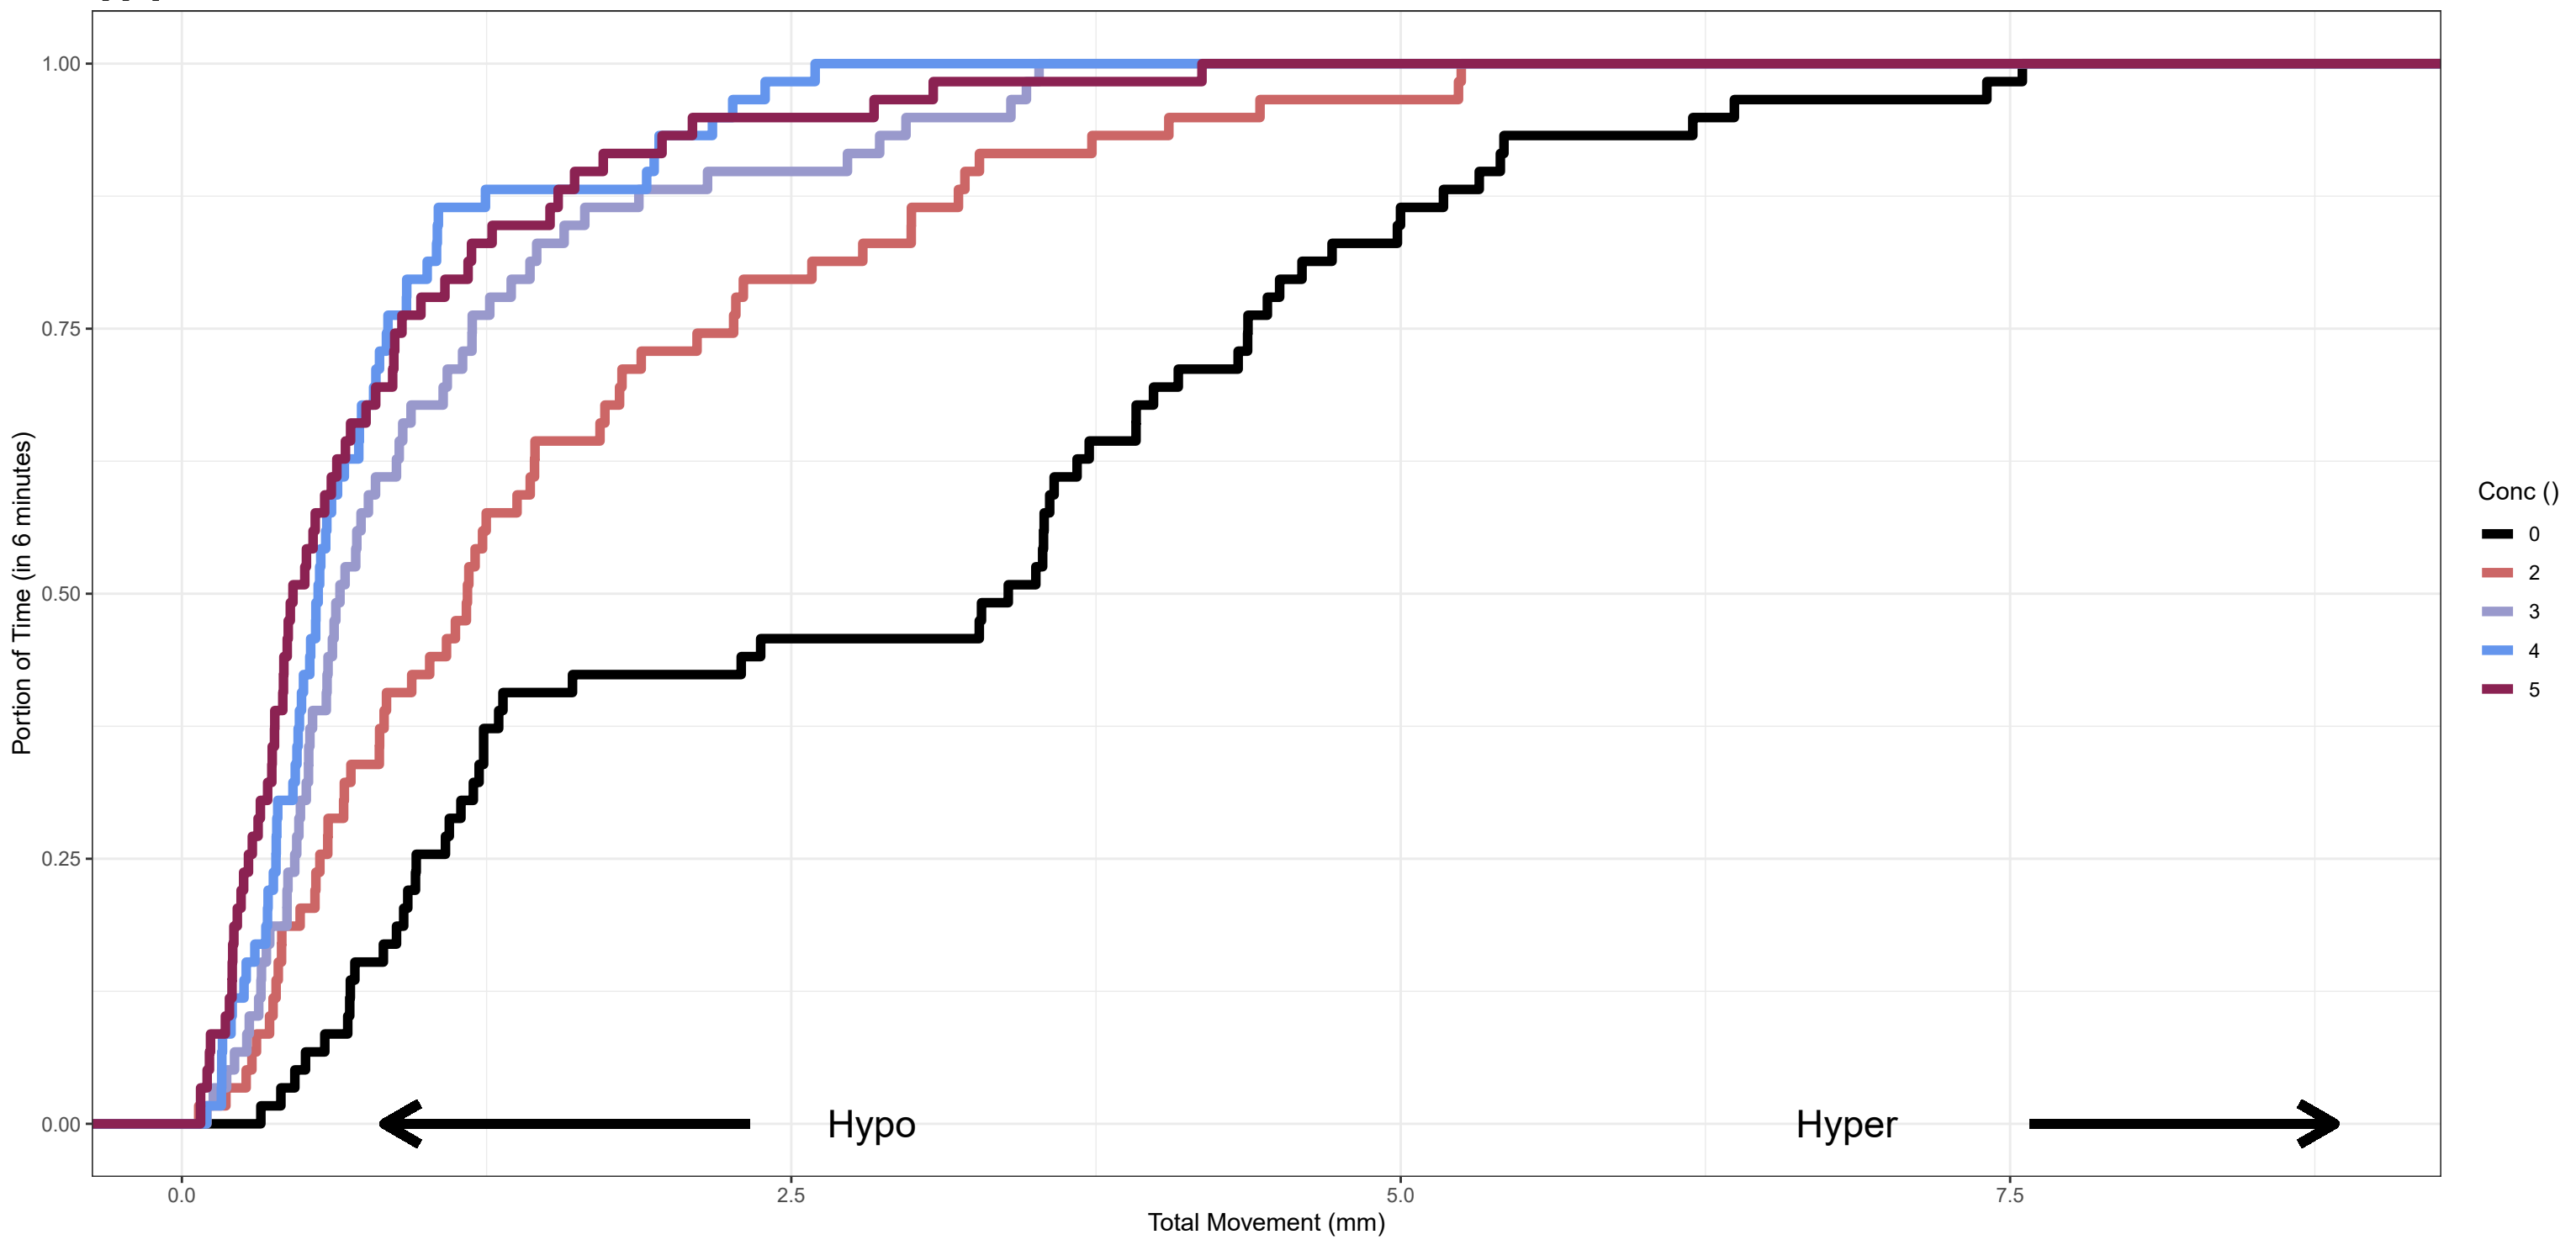



**G14 mix**

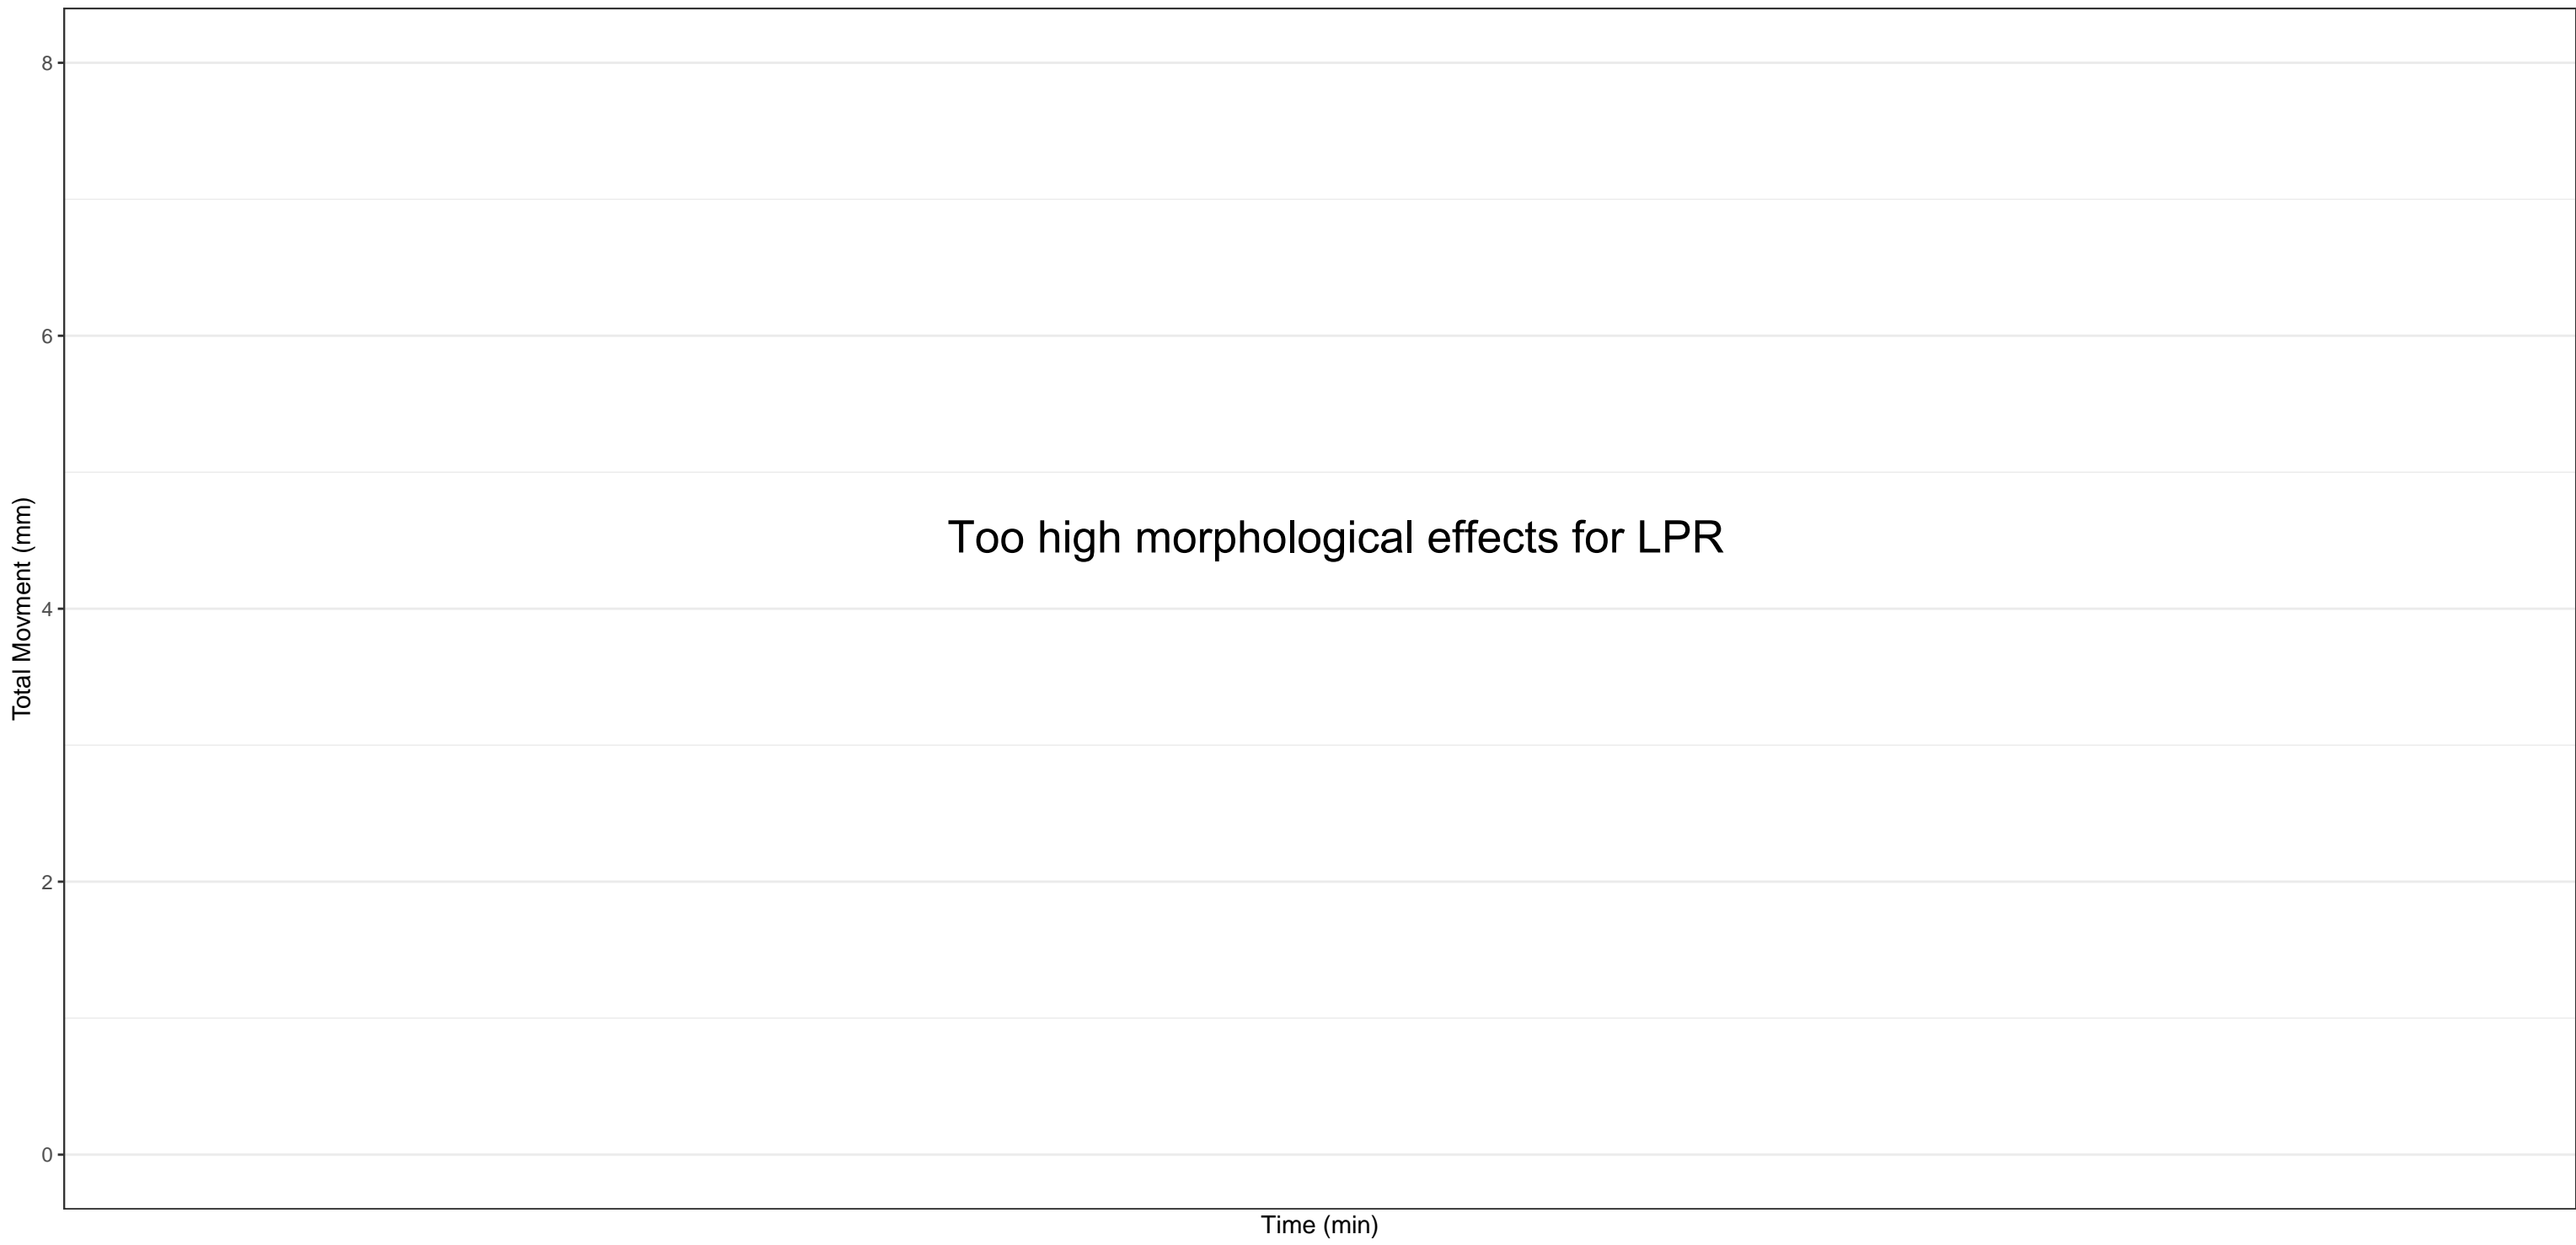



# ZF BMC Mix

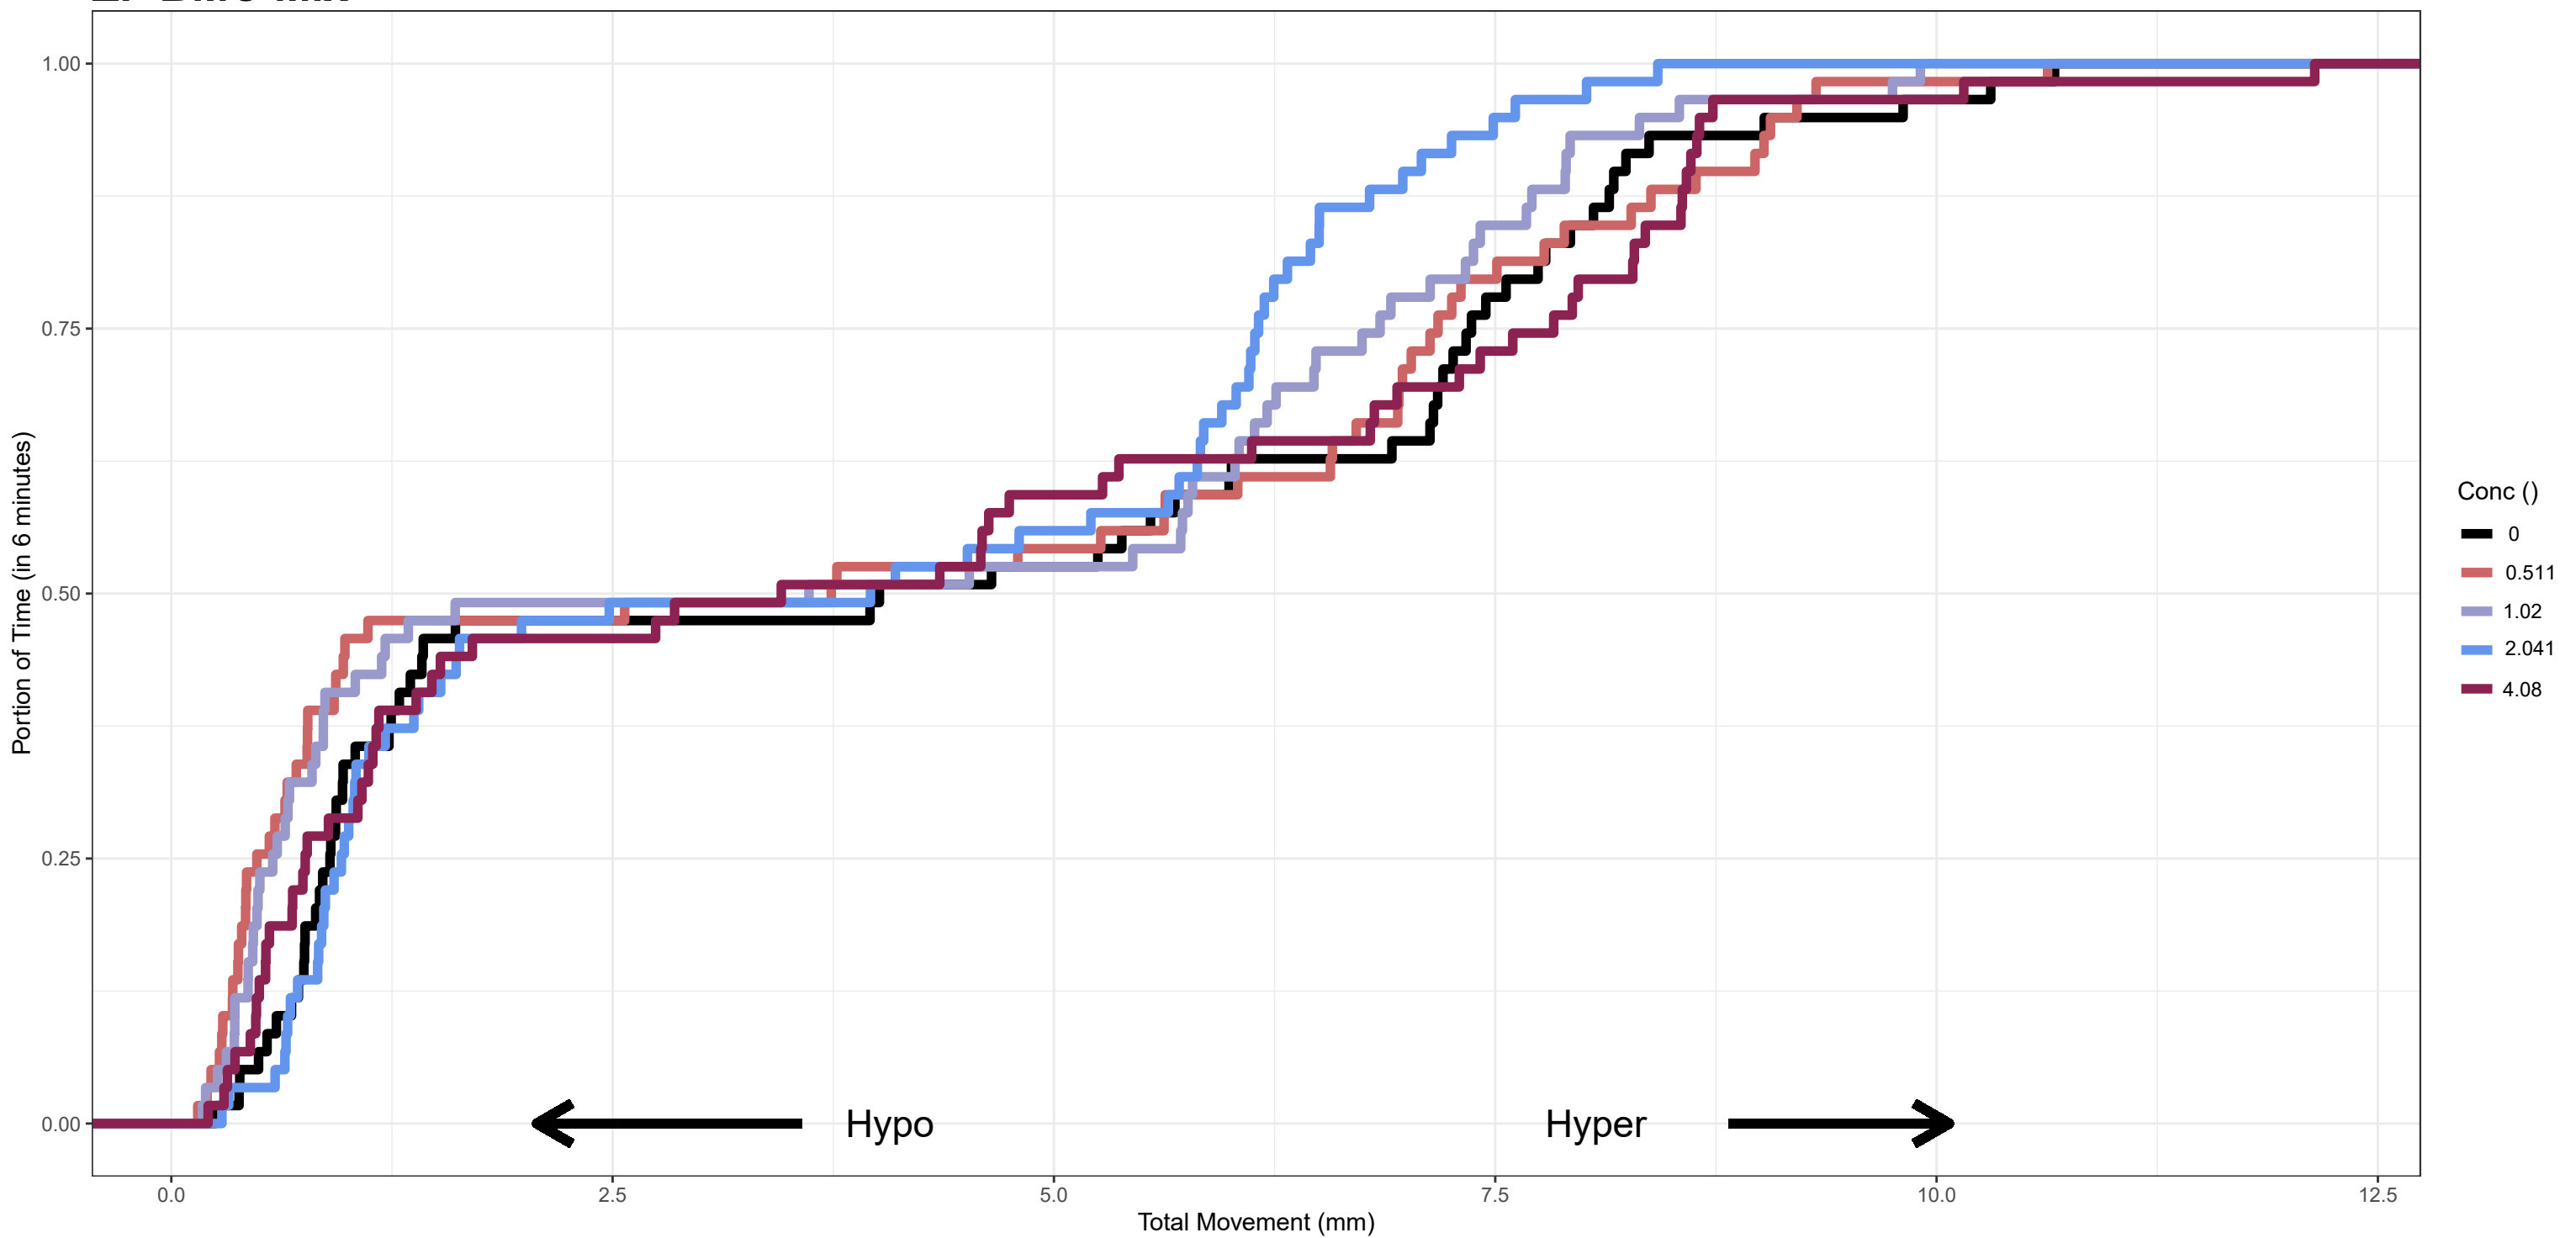



# ZF Equi-Mix

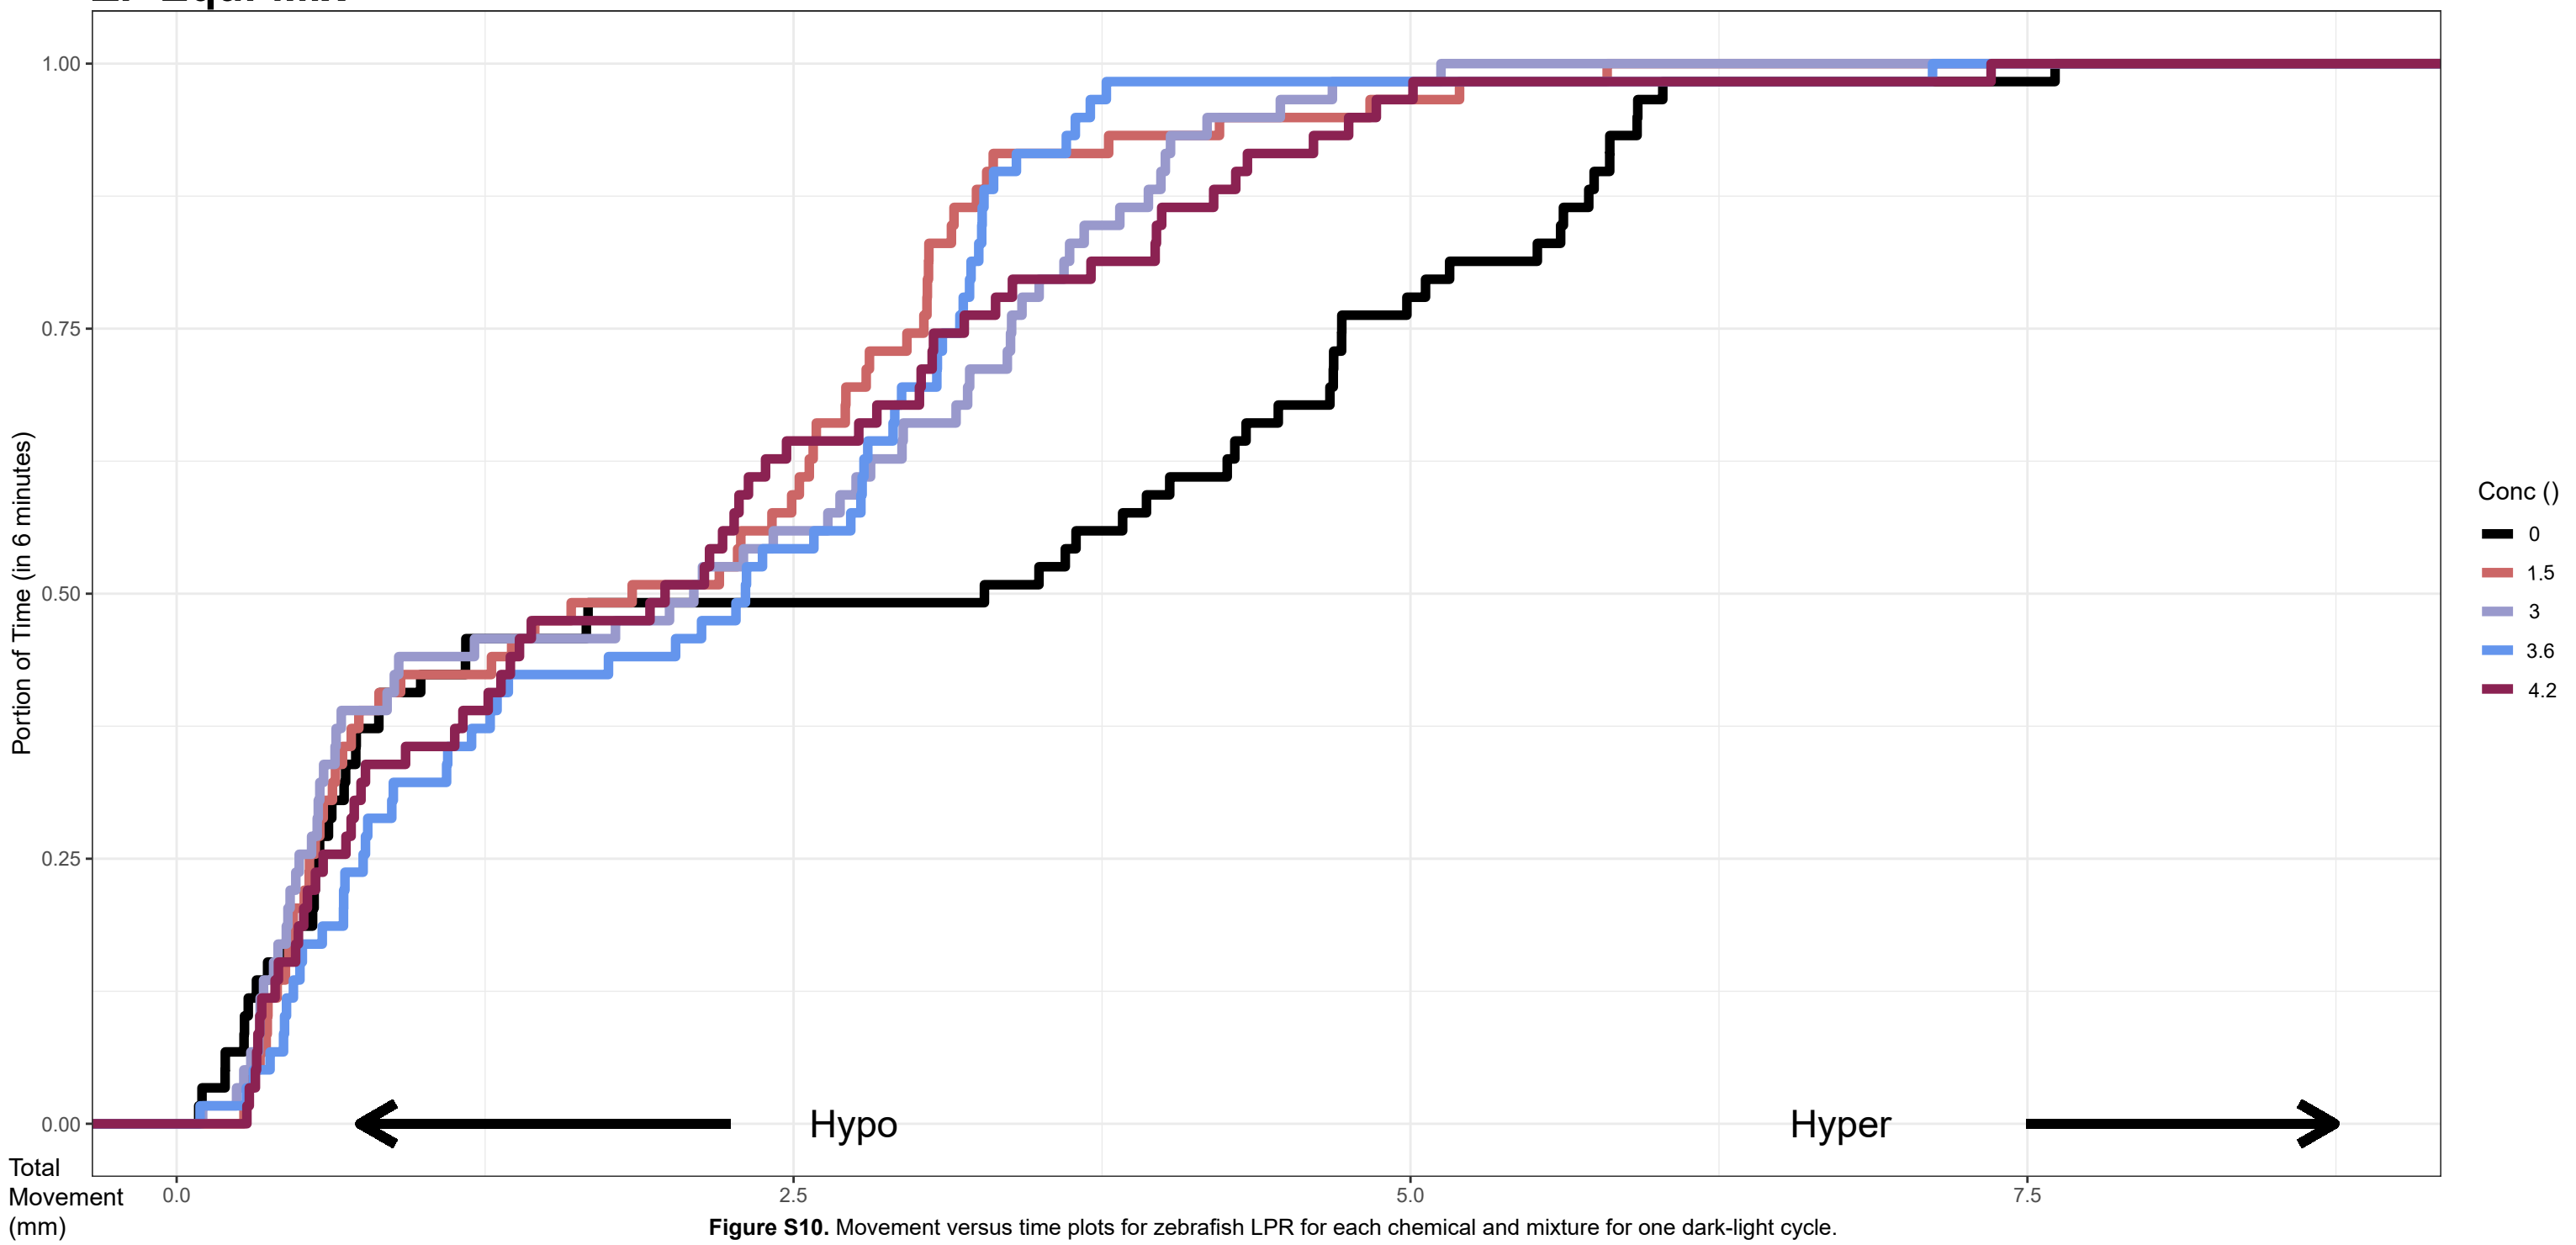



**Table S7.** Larval photomotor response (LPR) compiled data for all chemicals and mixtures tested in zebrafish.

| Chemical | Concentration (μM) | Phase | # viable animals | # total animals | % viable animals | More than 70% viable | AUC    | Pval  | RelativeRatio | Significance p<0.01 | Activity |
|----------|--------------------|-------|------------------|-----------------|------------------|----------------------|--------|-------|---------------|---------------------|----------|
| AHTN     | 0                  | Dark  | 11               | 12              | 0.92             | TRUE                 | 79.621 | 1     | 0             | NA                  | NA       |
| AHTN     | 10                 | Dark  | 11               | 12              | 0.92             | TRUE                 | 83.148 | 0.135 | 0.044         | NA                  | NA       |
| AHTN     | 30                 | Dark  | 12               | 12              | 1                | TRUE                 | 77.308 | 0.808 | -0.029        | NA                  | NA       |
| AHTN     | 50                 | Dark  | 10               | 12              | 0.83             | TRUE                 | 72.328 | 0.239 | -0.092        | NA                  | NA       |
| AHTN     | 60                 | Dark  | 7                | 12              | 0.58             | FALSE                | 74.801 | 0.239 | -0.061        | NA                  | NA       |
| AHTN     | 70                 | Dark  | 7                | 12              | 0.58             | FALSE                | NA     | NA    | NA            | NA                  | NA       |
| AHTN     | 80                 | Dark  | 4                | 12              | 0.33             | FALSE                | NA     | NA    | NA            | NA                  | NA       |
| AHTN     | 100                | Dark  | 1                | 12              | 0.08             | FALSE                | NA     | NA    | NA            | NA                  | NA       |
| AHTN     | 0                  | Light | 11               | 12              | 0.92             | TRUE                 | 23.087 | 1     | 0             | NA                  | NA       |
| AHTN     | 10                 | Light | 11               | 12              | 0.92             | TRUE                 | 28.799 | 0.564 | 0.247         | NA                  | NA       |
| AHTN     | 30                 | Light | 12               | 12              | 1                | TRUE                 | 26.598 | 0.945 | 0.152         | NA                  | NA       |
| AHTN     | 50                 | Light | 10               | 12              | 0.83             | TRUE                 | 26.629 | 0.064 | 0.153         | NA                  | NA       |
| AHTN     | 60                 | Light | 7                | 12              | 0.58             | FALSE                | 31.841 | 0.064 | 0.379         | NA                  | NA       |
| AHTN     | 70                 | Light | 7                | 12              | 0.58             | FALSE                | NA     | NA    | NA            | NA                  | NA       |
| AHTN     | 80                 | Light | 4                | 12              | 0.33             | FALSE                | NA     | NA    | NA            | NA                  | NA       |
| AHTN     | 100                | Light | 1                | 12              | 0.08             | FALSE                | NA     | NA    | NA            | NA                  | NA       |
| BBP      | 0                  | Dark  | 35               | 36              | 0.97             | TRUE                 | 52.512 | 1     | 0             | NA                  | NA       |
| BBP      | 2.25               | Dark  | 36               | 36              | 1                | TRUE                 | 72.301 | 0.015 | 0.377         | NA                  | NA       |
| BBP      | 3                  | Dark  | 32               | 36              | 0.89             | TRUE                 | 68.401 | 0.015 | 0.303         | NA                  | NA       |
| BBP      | 3.5                | Dark  | 31               | 36              | 0.86             | TRUE                 | 52.056 | 0.081 | -0.009        | NA                  | NA       |
| BBP      | 4                  | Dark  | 14               | 24              | 0.58             | FALSE                | 82.728 | 0.004 | 0.575         | NA                  | NA       |
| BBP      | 4.5                | Dark  | 10               | 24              | 0.42             | FALSE                | NA     | NA    | NA            | NA                  | NA       |
| BBP      | 5                  | Dark  | 5                | 24              | 0.21             | FALSE                | NA     | NA    | NA            | NA                  | NA       |
| BBP      | 8                  | Dark  | 0                | 24              | 0                | FALSE                | NA     | NA    | NA            | NA                  | NA       |
| BBP      | 0                  | Light | 35               | 36              | 0.97             | TRUE                 | 57.444 | 1     | 0             | NA                  | NA       |
| BBP      | 2.25               | Light | 36               | 36              | 1                | TRUE                 | 34.46  | 0.001 | -0.4          | YES                 | HYPO     |
| BBP      | 3                  | Light | 32               | 36              | 0.89             | TRUE                 | 57.926 | 0.012 | 0.008         | NA                  | NA       |
| BBP      | 3.5                | Light | 31               | 36              | 0.86             | TRUE                 | 40.229 | 0.02  | -0.3          | NA                  | NA       |
| BBP      | 4                  | Light | 14               | 24              | 0.58             | FALSE                | 75.329 | 0.003 | 0.311         | NA                  | NA       |
| BBP      | 4.5                | Light | 10               | 24              | 0.42             | FALSE                | NA     | NA    | NA            | NA                  | NA       |
| BBP      | 5                  | Light | 5                | 24              | 0.21             | FALSE                | NA     | NA    | NA            | NA                  | NA       |
| BBP      | 8                  | Light | 0                | 24              | 0                | FALSE                | NA     | NA    | NA            | NA                  | NA       |
| BHT      | 0                  | Dark  | 21               | 24              | 0.88             | TRUE                 | 83.127 | 1     | 0             | NA                  | NA       |
| BHT      | 1                  | Dark  | 20               | 24              | 0.83             | TRUE                 | 78.452 | 0.076 | -0.056        | NA                  | NA       |
| BHT      | 2.54               | Dark  | 23               | 24              | 0.96             | TRUE                 | 57.497 | 0.12  | -0.308        | NA                  | NA       |
| BHT      | 6.45               | Dark  | 23               | 24              | 0.96             | TRUE                 | 75.727 | 0.665 | -0.089        | NA                  | NA       |
| BHT      | 16.4               | Dark  | 23               | 24              | 0.96             | TRUE                 | 88.632 | 0.182 | 0.066         | NA                  | NA       |
| BHT      | 35                 | Dark  | 23               | 24              | 0.96             | TRUE                 | 74.97  | 0.182 | -0.098        | NA                  | NA       |
| BHT      | 74.8               | Dark  | 23               | 24              | 0.96             | TRUE                 | 74.595 | 0.378 | -0.103        | NA                  | NA       |
| BHT      | 100                | Dark  | 23               | 24              | 0.96             | TRUE                 | 70.236 | 0.016 | -0.155        | NA                  | NA       |
| BHT      | 0                  | Light | 21               | 24              | 0.88             | TRUE                 | 18.427 | 1     | 0             | NA                  | NA       |
| BHT      | 1                  | Light | 20               | 24              | 0.83             | TRUE                 | 8.053  | 0.355 | -0.563        | NA                  | NA       |
| BHT      | 2.54               | Light | 23               | 24              | 0.96             | TRUE                 | 28.55  | 0.916 | 0.549         | NA                  | NA       |
| BHT      | 6.45               | Light | 23               | 24              | 0.96             | TRUE                 | 24.025 | 0.355 | 0.304         | NA                  | NA       |
| BHT      | 16.4               | Light | 23               | 24              | 0.96             | TRUE                 | 7.004  | 0.068 | -0.62         | NA                  | NA       |
| BHT      | 35                 | Light | 23               | 24              | 0.96             | TRUE                 | 24.736 | 0.167 | 0.342         | NA                  | NA       |
| BHT      | 74.8               | Light | 23               | 24              | 0.96             | TRUE                 | 10.322 | 0     | -0.44         | YES                 | HYPO     |
| BHT      | 100                | Light | 23               | 24              | 0.96             | TRUE                 | 27.472 | 0     | 0.491         | YES                 | HYPER    |
| BP       | 0                  | Dark  | 31               | 36              | 0.86             | TRUE                 | 63.757 | 1     | 0             | NA                  | NA       |
| BP       | 20                 | Dark  | 33               | 36              | 0.92             | TRUE                 | 52.129 | 0.023 | -0.182        | NA                  | NA       |



|      |      |       |    |    |      |       |         |       |        |     |      |
|------|------|-------|----|----|------|-------|---------|-------|--------|-----|------|
| BP   | 40   | Dark  | 25 | 36 | 0.69 | FALSE | 50.563  | 0     | -0.207 | NA  | NA   |
| BP   | 50   | Dark  | 30 | 36 | 0.83 | TRUE  | 40.462  | 0     | -0.365 | YES | HYPO |
| BP   | 60   | Dark  | 22 | 36 | 0.61 | FALSE | 41.033  | 0     | -0.356 | NA  | NA   |
| BP   | 70   | Dark  | 27 | 36 | 0.75 | TRUE  | 6.368   | 0     | -0.9   | YES | HYPO |
| BP   | 80   | Dark  | 25 | 36 | 0.69 | FALSE | 17.655  | 0     | -0.723 | NA  | NA   |
| BP   | 100  | Dark  | 16 | 36 | 0.44 | FALSE | NA      | NA    | NA     | NA  | NA   |
| BP   | 0    | Light | 31 | 36 | 0.86 | TRUE  | 18.586  | 1     | 0      | NA  | NA   |
| BP   | 20   | Light | 33 | 36 | 0.92 | TRUE  | 17.547  | 0.21  | -0.056 | NA  | NA   |
| BP   | 40   | Light | 25 | 36 | 0.69 | FALSE | 3.107   | 0.21  | -0.833 | NA  | NA   |
| BP   | 50   | Light | 30 | 36 | 0.83 | TRUE  | 12.358  | 0.379 | -0.335 | NA  | NA   |
| BP   | 60   | Light | 22 | 36 | 0.61 | FALSE | 36.827  | 0.02  | 0.981  | NA  | NA   |
| BP   | 70   | Light | 27 | 36 | 0.75 | TRUE  | 21.409  | 0.379 | 0.152  | NA  | NA   |
| BP   | 80   | Light | 25 | 36 | 0.69 | FALSE | 24.142  | 0.49  | 0.299  | NA  | NA   |
| BP   | 100  | Light | 16 | 36 | 0.44 | FALSE | NA      | NA    | NA     | NA  | NA   |
| BS   | 0    | Dark  | 35 | 36 | 0.97 | TRUE  | 67.094  | 1     | 0      | NA  | NA   |
| BS   | 5    | Dark  | 33 | 36 | 0.92 | TRUE  | 59.228  | 0.001 | -0.117 | YES | HYPO |
| BS   | 10   | Dark  | 33 | 36 | 0.92 | TRUE  | 63.141  | 0.762 | -0.059 | NA  | NA   |
| BS   | 14   | Dark  | 21 | 36 | 0.58 | FALSE | NA      | NA    | NA     | NA  | NA   |
| BS   | 18   | Dark  | 9  | 36 | 0.25 | FALSE | NA      | NA    | NA     | NA  | NA   |
| BS   | 22   | Dark  | 1  | 36 | 0.03 | FALSE | NA      | NA    | NA     | NA  | NA   |
| BS   | 30   | Dark  | 0  | 36 | 0    | FALSE | NA      | NA    | NA     | NA  | NA   |
| BS   | 50   | Dark  | 0  | 36 | 0    | FALSE | NA      | NA    | NA     | NA  | NA   |
| BS   | 0    | Light | 35 | 36 | 0.97 | TRUE  | 29.607  | 1     | 0      | NA  | NA   |
| BS   | 5    | Light | 33 | 36 | 0.92 | TRUE  | 15.708  | 0.286 | -0.469 | NA  | NA   |
| BS   | 10   | Light | 33 | 36 | 0.92 | TRUE  | 38.52   | 0.013 | 0.301  | NA  | NA   |
| BS   | 14   | Light | 21 | 36 | 0.58 | FALSE | NA      | NA    | NA     | NA  | NA   |
| BS   | 18   | Light | 9  | 36 | 0.25 | FALSE | NA      | NA    | NA     | NA  | NA   |
| BS   | 22   | Light | 1  | 36 | 0.03 | FALSE | NA      | NA    | NA     | NA  | NA   |
| BS   | 30   | Light | 0  | 36 | 0    | FALSE | NA      | NA    | NA     | NA  | NA   |
| BS   | 50   | Light | 0  | 36 | 0    | FALSE | NA      | NA    | NA     | NA  | NA   |
| DBP  | 0    | Dark  | 31 | 36 | 0.86 | TRUE  | 114.433 | 1     | 0      | NA  | NA   |
| DBP  | 1    | Dark  | 29 | 36 | 0.81 | TRUE  | 79.579  | 0.001 | -0.305 | YES | HYPO |
| DBP  | 2    | Dark  | 33 | 36 | 0.92 | TRUE  | 55.486  | 0.036 | -0.515 | NA  | NA   |
| DBP  | 3    | Dark  | 22 | 36 | 0.61 | FALSE | 55.447  | 0     | -0.515 | NA  | NA   |
| DBP  | 4    | Dark  | 21 | 36 | 0.58 | FALSE | NA      | NA    | NA     | NA  | NA   |
| DBP  | 5    | Dark  | 9  | 36 | 0.25 | FALSE | NA      | NA    | NA     | NA  | NA   |
| DBP  | 10   | Dark  | 0  | 36 | 0    | FALSE | NA      | NA    | NA     | NA  | NA   |
| DBP  | 20   | Dark  | 0  | 36 | 0    | FALSE | NA      | NA    | NA     | NA  | NA   |
| DBP  | 0    | Light | 31 | 36 | 0.86 | TRUE  | 13.132  | 1     | 0      | NA  | NA   |
| DBP  | 1    | Light | 29 | 36 | 0.81 | TRUE  | 19.811  | 0.105 | 0.509  | NA  | NA   |
| DBP  | 2    | Light | 33 | 36 | 0.92 | TRUE  | 13.144  | 0.286 | 0.001  | NA  | NA   |
| DBP  | 3    | Light | 22 | 36 | 0.61 | FALSE | 13.806  | 0     | 0.051  | NA  | NA   |
| DBP  | 4    | Light | 21 | 36 | 0.58 | FALSE | NA      | NA    | NA     | NA  | NA   |
| DBP  | 5    | Light | 9  | 36 | 0.25 | FALSE | NA      | NA    | NA     | NA  | NA   |
| DBP  | 10   | Light | 0  | 36 | 0    | FALSE | NA      | NA    | NA     | NA  | NA   |
| DBP  | 20   | Light | 0  | 36 | 0    | FALSE | NA      | NA    | NA     | NA  | NA   |
| DEET | 0    | Dark  | 34 | 36 | 0.94 | TRUE  | 73.856  | 1     | 0      | NA  | NA   |
| DEET | 1    | Dark  | 33 | 36 | 0.92 | TRUE  | 63.092  | 0.002 | -0.146 | YES | HYPO |
| DEET | 2.54 | Dark  | 33 | 36 | 0.92 | TRUE  | 66.598  | 0.001 | -0.098 | YES | NA   |
| DEET | 6.45 | Dark  | 30 | 36 | 0.83 | TRUE  | 95.121  | 0.635 | 0.288  | NA  | NA   |
| DEET | 16.4 | Dark  | 31 | 36 | 0.86 | TRUE  | 67.903  | 0.512 | -0.081 | NA  | NA   |



|      |      |       |    |    |      |       |         |       |        |     |       |
|------|------|-------|----|----|------|-------|---------|-------|--------|-----|-------|
| DEET | 35   | Dark  | 31 | 36 | 0.86 | TRUE  | 97.11   | 0.95  | 0.315  | NA  | NA    |
| DEET | 74.8 | Dark  | 30 | 35 | 0.86 | TRUE  | 56.972  | 0.001 | -0.229 | YES | HYPO  |
| DEET | 100  | Dark  | 33 | 36 | 0.92 | TRUE  | 68.828  | 0     | -0.068 | YES | NA    |
| DEET | 0    | Light | 34 | 36 | 0.94 | TRUE  | 20.476  | 1     | 0      | NA  | NA    |
| DEET | 1    | Light | 33 | 36 | 0.92 | TRUE  | 53.37   | 0.032 | 1.607  | NA  | NA    |
| DEET | 2.54 | Light | 33 | 36 | 0.92 | TRUE  | 36.173  | 0.151 | 0.767  | NA  | NA    |
| DEET | 6.45 | Light | 30 | 36 | 0.83 | TRUE  | 9.817   | 0.003 | -0.521 | YES | HYPO  |
| DEET | 16.4 | Light | 31 | 36 | 0.86 | TRUE  | 9.283   | 0.002 | -0.547 | YES | HYPO  |
| DEET | 35   | Light | 31 | 36 | 0.86 | TRUE  | 44.441  | 0.005 | 1.17   | YES | HYPER |
| DEET | 74.8 | Light | 30 | 35 | 0.86 | TRUE  | 46.118  | 0.49  | 1.252  | NA  | NA    |
| DEET | 100  | Light | 33 | 36 | 0.92 | TRUE  | 39.142  | 0.49  | 0.912  | NA  | NA    |
| DEHP | 0    | Dark  | 33 | 36 | 0.92 | TRUE  | 64.393  | 1     | 0      | NA  | NA    |
| DEHP | 1    | Dark  | 35 | 36 | 0.97 | TRUE  | 53.69   | 0.515 | -0.166 | NA  | NA    |
| DEHP | 3    | Dark  | 36 | 36 | 1    | TRUE  | 79.732  | 0.515 | 0.238  | NA  | NA    |
| DEHP | 5    | Dark  | 35 | 36 | 0.97 | TRUE  | 80.529  | 0.015 | 0.251  | NA  | NA    |
| DEHP | 10   | Dark  | 35 | 36 | 0.97 | TRUE  | 80.761  | 0.762 | 0.254  | NA  | NA    |
| DEHP | 20   | Dark  | 32 | 36 | 0.89 | TRUE  | 63.7    | 0.081 | -0.011 | NA  | NA    |
| DEHP | 40   | Dark  | 35 | 36 | 0.97 | TRUE  | 66.57   | 0.116 | 0.034  | NA  | NA    |
| DEHP | 80   | Dark  | 35 | 36 | 0.97 | TRUE  | 75.097  | 0.015 | 0.166  | NA  | NA    |
| DEHP | 0    | Light | 33 | 36 | 0.92 | TRUE  | 42.629  | 1     | 0      | NA  | NA    |
| DEHP | 1    | Light | 35 | 36 | 0.97 | TRUE  | 31.816  | 0.013 | -0.254 | NA  | NA    |
| DEHP | 3    | Light | 36 | 36 | 1    | TRUE  | 29.494  | 0.614 | -0.308 | NA  | NA    |
| DEHP | 5    | Light | 35 | 36 | 0.97 | TRUE  | 55.708  | 0.151 | 0.307  | NA  | NA    |
| DEHP | 10   | Light | 35 | 36 | 0.97 | TRUE  | 47.498  | 0     | 0.114  | YES | HYPER |
| DEHP | 20   | Light | 32 | 36 | 0.89 | TRUE  | 5.095   | 0.74  | -0.88  | NA  | NA    |
| DEHP | 40   | Light | 35 | 36 | 0.97 | TRUE  | 16.551  | 0.072 | -0.612 | NA  | NA    |
| DEHP | 80   | Light | 35 | 36 | 0.97 | TRUE  | 5.699   | 0.005 | -0.866 | YES | HYPO  |
| DEP  | 0    | Dark  | 30 | 36 | 0.83 | TRUE  | 79.84   | 1     | 0      | NA  | NA    |
| DEP  | 1    | Dark  | 35 | 36 | 0.97 | TRUE  | 68.737  | 0.4   | -0.139 | NA  | NA    |
| DEP  | 2.54 | Dark  | 35 | 36 | 0.97 | TRUE  | 64.511  | 0.001 | -0.192 | YES | HYPO  |
| DEP  | 6.45 | Dark  | 35 | 36 | 0.97 | TRUE  | 52.704  | 0.305 | -0.34  | NA  | NA    |
| DEP  | 16.4 | Dark  | 36 | 36 | 1    | TRUE  | 77.055  | 0.009 | -0.035 | YES | NA    |
| DEP  | 35   | Dark  | 35 | 36 | 0.97 | TRUE  | 68.978  | 0.081 | -0.136 | NA  | NA    |
| DEP  | 74.8 | Dark  | 35 | 36 | 0.97 | TRUE  | 68.525  | 0.055 | -0.142 | NA  | NA    |
| DEP  | 100  | Dark  | 36 | 36 | 1    | TRUE  | 70.126  | 0.036 | -0.122 | NA  | NA    |
| DEP  | 0    | Light | 30 | 36 | 0.83 | TRUE  | 29.857  | 1     | 0      | NA  | NA    |
| DEP  | 1    | Light | 35 | 36 | 0.97 | TRUE  | 5.098   | 0.105 | -0.829 | NA  | NA    |
| DEP  | 2.54 | Light | 35 | 36 | 0.97 | TRUE  | 11.005  | 0.379 | -0.631 | NA  | NA    |
| DEP  | 6.45 | Light | 35 | 36 | 0.97 | TRUE  | 18.295  | 0.379 | -0.387 | NA  | NA    |
| DEP  | 16.4 | Light | 36 | 36 | 1    | TRUE  | 11.781  | 0.286 | -0.605 | NA  | NA    |
| DEP  | 35   | Light | 35 | 36 | 0.97 | TRUE  | 6.014   | 0.856 | -0.799 | NA  | NA    |
| DEP  | 74.8 | Light | 35 | 36 | 0.97 | TRUE  | 41.49   | 0.941 | 0.39   | NA  | NA    |
| DEP  | 100  | Light | 36 | 36 | 1    | TRUE  | 5.598   | 0.286 | -0.812 | NA  | NA    |
| DIBP | 0    | Dark  | 36 | 36 | 1    | TRUE  | 81.115  | 1     | 0      | NA  | NA    |
| DIBP | 2    | Dark  | 33 | 36 | 0.92 | TRUE  | 91.552  | 0.081 | 0.129  | NA  | NA    |
| DIBP | 4    | Dark  | 29 | 36 | 0.81 | TRUE  | 61.76   | 0.762 | -0.239 | NA  | NA    |
| DIBP | 5    | Dark  | 28 | 36 | 0.78 | TRUE  | 101.226 | 0.023 | 0.248  | NA  | NA    |
| DIBP | 6    | Dark  | 20 | 36 | 0.56 | FALSE | NA      | NA    | NA     | NA  | NA    |
| DIBP | 8    | Dark  | 5  | 36 | 0.14 | FALSE | NA      | NA    | NA     | NA  | NA    |
| DIBP | 10   | Dark  | 0  | 36 | 0    | FALSE | NA      | NA    | NA     | NA  | NA    |
| DIBP | 15   | Dark  | 0  | 36 | 0    | FALSE | NA      | NA    | NA     | NA  | NA    |



|         |     |       |    |    |      |       |         |       |        |     |       |
|---------|-----|-------|----|----|------|-------|---------|-------|--------|-----|-------|
| DIBP    | 0   | Light | 36 | 36 | 1    | TRUE  | 11.958  | 1     | 0      | NA  | NA    |
| DIBP    | 2   | Light | 33 | 36 | 0.92 | TRUE  | 4.563   | 0.008 | -0.618 | YES | HYPO  |
| DIBP    | 4   | Light | 29 | 36 | 0.81 | TRUE  | 30.116  | 0.286 | 1.518  | NA  | NA    |
| DIBP    | 5   | Light | 28 | 36 | 0.78 | TRUE  | 19.083  | 0.048 | 0.596  | NA  | NA    |
| DIBP    | 6   | Light | 20 | 36 | 0.56 | FALSE | NA      | NA    | NA     | NA  | NA    |
| DIBP    | 8   | Light | 5  | 36 | 0.14 | FALSE | NA      | NA    | NA     | NA  | NA    |
| DIBP    | 10  | Light | 0  | 36 | 0    | FALSE | NA      | NA    | NA     | NA  | NA    |
| DIBP    | 15  | Light | 0  | 36 | 0    | FALSE | NA      | NA    | NA     | NA  | NA    |
| DNP     | 0   | Dark  | 34 | 36 | 0.94 | TRUE  | 84.512  | 1     | 0      | NA  | NA    |
| DNP     | 2   | Dark  | 35 | 36 | 0.97 | TRUE  | 99.096  | 0.036 | 0.173  | NA  | NA    |
| DNP     | 10  | Dark  | 35 | 36 | 0.97 | TRUE  | 104.124 | 0.009 | 0.232  | YES | HYPER |
| DNP     | 30  | Dark  | 35 | 36 | 0.97 | TRUE  | 99.621  | 0.635 | 0.179  | NA  | NA    |
| DNP     | 50  | Dark  | 33 | 35 | 0.94 | TRUE  | 109.334 | 0.036 | 0.294  | NA  | NA    |
| DNP     | 70  | Dark  | 34 | 36 | 0.94 | TRUE  | 106.927 | 0.055 | 0.265  | NA  | NA    |
| DNP     | 80  | Dark  | 35 | 36 | 0.97 | TRUE  | 106.448 | 0.116 | 0.26   | NA  | NA    |
| DNP     | 100 | Dark  | 31 | 36 | 0.86 | TRUE  | 101.953 | 0     | 0.206  | YES | HYPER |
| DNP     | 0   | Light | 34 | 36 | 0.94 | TRUE  | 50.083  | 1     | 0      | NA  | NA    |
| DNP     | 2   | Light | 35 | 36 | 0.97 | TRUE  | 32.508  | 0.21  | -0.351 | NA  | NA    |
| DNP     | 10  | Light | 35 | 36 | 0.97 | TRUE  | 15.064  | 0.105 | -0.699 | NA  | NA    |
| DNP     | 30  | Light | 35 | 36 | 0.97 | TRUE  | 57.18   | 0     | 0.142  | YES | HYPER |
| DNP     | 50  | Light | 33 | 35 | 0.94 | TRUE  | 40.603  | 0.001 | -0.189 | YES | HYPO  |
| DNP     | 70  | Light | 34 | 36 | 0.94 | TRUE  | 8.08    | 0     | -0.839 | YES | HYPO  |
| DNP     | 80  | Light | 35 | 36 | 0.97 | TRUE  | 45.659  | 0     | -0.088 | YES | NA    |
| DNP     | 100 | Light | 31 | 36 | 0.86 | TRUE  | 13.421  | 0.001 | -0.732 | YES | HYPO  |
| G14 Mix | 0   | Dark  | 32 | 36 | 0.89 | TRUE  | 18.679  | 1     | 0      | NA  | NA    |
| G14 Mix | 28  | Dark  | 23 | 36 | 0.64 | FALSE | 13.906  | 0.002 | -0.338 | NA  | NA    |
| G14 Mix | 56  | Dark  | 14 | 36 | 0.39 | FALSE | NA      | NA    | NA     | NA  | NA    |
| G14 Mix | 63  | Dark  | 2  | 36 | 0.06 | FALSE | NA      | NA    | NA     | NA  | NA    |
| G14 Mix | 70  | Dark  | 4  | 36 | 0.11 | FALSE | NA      | NA    | NA     | NA  | NA    |
| G14 Mix | 77  | Dark  | 0  | 36 | 0    | FALSE | NA      | NA    | NA     | NA  | NA    |
| G14 Mix | 84  | Dark  | 0  | 36 | 0    | FALSE | NA      | NA    | NA     | NA  | NA    |
| G14 Mix | 112 | Dark  | 0  | 36 | 0    | FALSE | NA      | NA    | NA     | NA  | NA    |
| G14 Mix | 0   | Light | 32 | 36 | 0.89 | TRUE  | 14.487  | 1     | 0      | NA  | NA    |
| G14 Mix | 28  | Light | 23 | 36 | 0.64 | FALSE | 13.493  | 0.001 | -0.785 | NA  | NA    |
| G14 Mix | 56  | Light | 14 | 36 | 0.39 | FALSE | NA      | NA    | NA     | NA  | NA    |
| G14 Mix | 63  | Light | 2  | 36 | 0.06 | FALSE | NA      | NA    | NA     | NA  | NA    |
| G14 Mix | 70  | Light | 4  | 36 | 0.11 | FALSE | NA      | NA    | NA     | NA  | NA    |
| G14 Mix | 77  | Light | 0  | 36 | 0    | FALSE | NA      | NA    | NA     | NA  | NA    |
| G14 Mix | 84  | Light | 0  | 36 | 0    | FALSE | NA      | NA    | NA     | NA  | NA    |
| G14 Mix | 112 | Light | 0  | 36 | 0    | FALSE | NA      | NA    | NA     | NA  | NA    |
| HHCB    | 0   | Dark  | 35 | 36 | 0.97 | TRUE  | 83.837  | 1     | 0      | NA  | NA    |
| HHCB    | 10  | Dark  | 30 | 36 | 0.83 | TRUE  | 123.374 | 0     | 0.472  | YES | HYPER |
| HHCB    | 14  | Dark  | 28 | 36 | 0.78 | TRUE  | 77.473  | 0     | -0.076 | YES | NA    |
| HHCB    | 16  | Dark  | 25 | 36 | 0.69 | FALSE | 111.206 | 0     | 0.326  | NA  | NA    |
| HHCB    | 20  | Dark  | 10 | 36 | 0.28 | FALSE | NA      | NA    | NA     | NA  | NA    |
| HHCB    | 24  | Dark  | 0  | 36 | 0    | FALSE | NA      | NA    | NA     | NA  | NA    |
| HHCB    | 28  | Dark  | 0  | 36 | 0    | FALSE | NA      | NA    | NA     | NA  | NA    |
| HHCB    | 32  | Dark  | 0  | 36 | 0    | FALSE | NA      | NA    | NA     | NA  | NA    |
| HHCB    | 0   | Light | 35 | 36 | 0.97 | TRUE  | 36.368  | 1     | 0      | NA  | NA    |
| HHCB    | 10  | Light | 30 | 36 | 0.83 | TRUE  | 13.099  | 0.008 | -0.64  | YES | HYPO  |
| HHCB    | 14  | Light | 28 | 36 | 0.78 | TRUE  | 18.47   | 0.379 | -0.492 | NA  | NA    |



|            |       |       |    |    |      |       |        |       |        |     |       |
|------------|-------|-------|----|----|------|-------|--------|-------|--------|-----|-------|
| HHCB       | 16    | Light | 25 | 36 | 0.69 | FALSE | 13.351 | 0     | -0.633 | NA  | NA    |
| HHCB       | 20    | Light | 10 | 36 | 0.28 | FALSE | NA     | NA    | NA     | NA  | NA    |
| HHCB       | 24    | Light | 0  | 36 | 0    | FALSE | NA     | NA    | NA     | NA  | NA    |
| HHCB       | 28    | Light | 0  | 36 | 0    | FALSE | NA     | NA    | NA     | NA  | NA    |
| HHCB       | 32    | Light | 0  | 36 | 0    | FALSE | NA     | NA    | NA     | NA  | NA    |
| Lilial     | 0     | Dark  | 34 | 36 | 0.94 | TRUE  | 62.416 | 1     | 0      | NA  | NA    |
| Lilial     | 20    | Dark  | 35 | 36 | 0.97 | TRUE  | 36.487 | 0.164 | -0.415 | NA  | NA    |
| Lilial     | 40    | Dark  | 32 | 36 | 0.89 | TRUE  | 33.854 | 0     | -0.458 | YES | HYPO  |
| Lilial     | 60    | Dark  | 31 | 36 | 0.86 | TRUE  | 28.3   | 0     | -0.547 | YES | HYPO  |
| Lilial     | 70    | Dark  | 21 | 36 | 0.58 | FALSE | NA     | NA    | NA     | NA  | NA    |
| Lilial     | 80    | Dark  | 17 | 36 | 0.47 | FALSE | NA     | NA    | NA     | NA  | NA    |
| Lilial     | 90    | Dark  | 13 | 36 | 0.36 | FALSE | NA     | NA    | NA     | NA  | NA    |
| Lilial     | 100   | Dark  | 10 | 36 | 0.28 | FALSE | NA     | NA    | NA     | NA  | NA    |
| Lilial     | 0     | Light | 34 | 36 | 0.94 | TRUE  | 39.413 | 1     | 0      | NA  | NA    |
| Lilial     | 20    | Light | 35 | 36 | 0.97 | TRUE  | 1.694  | 0.105 | -0.957 | NA  | NA    |
| Lilial     | 40    | Light | 32 | 36 | 0.89 | TRUE  | 0.986  | 0.286 | -0.975 | NA  | NA    |
| Lilial     | 60    | Light | 31 | 36 | 0.86 | TRUE  | 27.062 | 0.005 | -0.313 | YES | HYPO  |
| Lilial     | 70    | Light | 21 | 36 | 0.58 | FALSE | NA     | NA    | NA     | NA  | NA    |
| Lilial     | 80    | Light | 17 | 36 | 0.47 | FALSE | NA     | NA    | NA     | NA  | NA    |
| Lilial     | 90    | Light | 13 | 36 | 0.36 | FALSE | NA     | NA    | NA     | NA  | NA    |
| Lilial     | 100   | Light | 10 | 36 | 0.28 | FALSE | NA     | NA    | NA     | NA  | NA    |
| TPP        | 0     | Dark  | 36 | 36 | 1    | TRUE  | 82.582 | 1     | 0      | NA  | NA    |
| TPP        | 2     | Dark  | 35 | 36 | 0.97 | TRUE  | 35.264 | 0     | -0.573 | YES | HYPO  |
| TPP        | 3     | Dark  | 36 | 36 | 1    | TRUE  | 43.229 | 0     | -0.477 | YES | HYPO  |
| TPP        | 4     | Dark  | 33 | 36 | 0.92 | TRUE  | 10.975 | 0     | -0.867 | YES | HYPO  |
| TPP        | 5     | Dark  | 29 | 36 | 0.81 | TRUE  | 17.859 | 0     | -0.784 | YES | HYPO  |
| TPP        | 6     | Dark  | 19 | 36 | 0.53 | FALSE | NA     | NA    | NA     | NA  | NA    |
| TPP        | 8     | Dark  | 12 | 36 | 0.33 | FALSE | NA     | NA    | NA     | NA  | NA    |
| TPP        | 10    | Dark  | 5  | 36 | 0.14 | FALSE | NA     | NA    | NA     | NA  | NA    |
| TPP        | 0     | Light | 36 | 36 | 1    | TRUE  | 8.733  | 1     | 0      | NA  | NA    |
| TPP        | 2     | Light | 35 | 36 | 0.97 | TRUE  | 9.54   | 0.032 | 0.092  | NA  | NA    |
| TPP        | 3     | Light | 36 | 36 | 1    | TRUE  | 24.324 | 0.105 | 1.785  | NA  | NA    |
| TPP        | 4     | Light | 33 | 36 | 0.92 | TRUE  | 10.169 | 0.005 | 0.164  | YES | HYPER |
| TPP        | 5     | Light | 29 | 36 | 0.81 | TRUE  | 1.125  | 0.002 | -0.871 | YES | HYPO  |
| TPP        | 6     | Light | 19 | 36 | 0.53 | FALSE | NA     | NA    | NA     | NA  | NA    |
| TPP        | 8     | Light | 12 | 36 | 0.33 | FALSE | NA     | NA    | NA     | NA  | NA    |
| TPP        | 10    | Light | 5  | 36 | 0.14 | FALSE | NA     | NA    | NA     | NA  | NA    |
| ZF BMC Mix | 0     | Dark  | 34 | 36 | 0.94 | TRUE  | 76.369 | 1     | 0      | NA  | NA    |
| ZF BMC Mix | 0.511 | Dark  | 29 | 36 | 0.81 | TRUE  | 84.237 | 0.515 | 0.103  | NA  | NA    |
| ZF BMC Mix | 1.02  | Dark  | 33 | 36 | 0.92 | TRUE  | 75.275 | 0.515 | -0.014 | NA  | NA    |
| ZF BMC Mix | 2.041 | Dark  | 30 | 36 | 0.83 | TRUE  | 76.86  | 0.054 | 0.006  | NA  | NA    |
| ZF BMC Mix | 4.08  | Dark  | 27 | 36 | 0.75 | TRUE  | 96.208 | 0.306 | 0.26   | NA  | NA    |
| ZF BMC Mix | 6.13  | Dark  | 17 | 36 | 0.47 | FALSE | NA     | NA    | NA     | NA  | NA    |
| ZF BMC Mix | 8.16  | Dark  | 8  | 36 | 0.22 | FALSE | NA     | NA    | NA     | NA  | NA    |
| ZF BMC Mix | 10.2  | Dark  | 1  | 36 | 0.03 | FALSE | NA     | NA    | NA     | NA  | NA    |
| ZF BMC Mix | 0     | Light | 34 | 36 | 0.94 | TRUE  | 29.774 | 1     | 0      | NA  | NA    |
| ZF BMC Mix | 0.511 | Light | 29 | 36 | 0.81 | TRUE  | 32.257 | 0.02  | 0.083  | NA  | NA    |
| ZF BMC Mix | 1.02  | Light | 33 | 36 | 0.92 | TRUE  | 5.942  | 0.048 | -0.8   | NA  | NA    |
| ZF BMC Mix | 2.041 | Light | 30 | 36 | 0.83 | TRUE  | 32.472 | 0.943 | 0.091  | NA  | NA    |
| ZF BMC Mix | 4.08  | Light | 27 | 36 | 0.75 | TRUE  | 21.587 | 0.151 | -0.275 | NA  | NA    |
| ZF BMC Mix | 6.13  | Light | 17 | 36 | 0.47 | FALSE | NA     | NA    | NA     | NA  | NA    |



|             |      |       |    |    |      |       |        |       |        |     |      |
|-------------|------|-------|----|----|------|-------|--------|-------|--------|-----|------|
| ZF BMC Mix  | 8.16 | Light | 8  | 36 | 0.22 | FALSE | NA     | NA    | NA     | NA  | NA   |
| ZF BMC Mix  | 10.2 | Light | 1  | 36 | 0.03 | FALSE | NA     | NA    | NA     | NA  | NA   |
| ZF Equi-Mix | 0    | Dark  | 34 | 36 | 0.94 | TRUE  | 75.27  | 1     | 0      | NA  | NA   |
| ZF Equi-Mix | 1.5  | Dark  | 33 | 36 | 0.92 | TRUE  | 66.803 | 0     | -0.112 | YES | HYPO |
| ZF Equi-Mix | 3    | Dark  | 34 | 36 | 0.94 | TRUE  | 61.908 | 0     | -0.178 | YES | HYPO |
| ZF Equi-Mix | 3.6  | Dark  | 29 | 36 | 0.81 | TRUE  | 69.203 | 0     | -0.081 | YES | NA   |
| ZF Equi-Mix | 4.2  | Dark  | 26 | 36 | 0.72 | TRUE  | 78.387 | 0     | 0.041  | YES | NA   |
| ZF Equi-Mix | 5.1  | Dark  | 19 | 36 | 0.53 | FALSE | NA     | NA    | NA     | NA  | NA   |
| ZF Equi-Mix | 6    | Dark  | 13 | 36 | 0.36 | FALSE | NA     | NA    | NA     | NA  | NA   |
| ZF Equi-Mix | 7.5  | Dark  | 3  | 33 | 0.09 | FALSE | NA     | NA    | NA     | NA  | NA   |
| ZF Equi-Mix | 0    | Light | 34 | 36 | 0.94 | TRUE  | 3.802  | 1     | 0      | NA  | NA   |
| ZF Equi-Mix | 1.5  | Light | 33 | 36 | 0.92 | TRUE  | 8.432  | 0.105 | 1.218  | NA  | NA   |
| ZF Equi-Mix | 3    | Light | 34 | 36 | 0.94 | TRUE  | 27.435 | 0.74  | 6.217  | NA  | NA   |
| ZF Equi-Mix | 3.6  | Light | 29 | 36 | 0.81 | TRUE  | 24.892 | 0.032 | 5.548  | NA  | NA   |
| ZF Equi-Mix | 4.2  | Light | 26 | 36 | 0.72 | TRUE  | 9.415  | 0.941 | 1.477  | NA  | NA   |
| ZF Equi-Mix | 5.1  | Light | 19 | 36 | 0.53 | FALSE | NA     | NA    | NA     | NA  | NA   |
| ZF Equi-Mix | 6    | Light | 13 | 36 | 0.36 | FALSE | NA     | NA    | NA     | NA  | NA   |
| ZF Equi-Mix | 7.5  | Light | 3  | 33 | 0.09 | FALSE | NA     | NA    | NA     | NA  | NA   |
